# Supplementary material for: Cathepsin A inhibition attenuates myocardial infarction-induced heart failure on the functional and proteomic levels
Source: J Transl Med. 2016 May 31;14:153. doi: 10.1186/s12967-016-0907-8 (PMC4888645; doi:10.1186/s12967-016-0907-8)
Supplement: Supplementary file 2 — 10.1186/s12967-016-0907-8 Overview of proteins that were identified and quantified in at least three of the four replicate experiments. [file 12967_2016_907_MOESM2_ESM.xlsx]

## Sheet: re-normalize
															104		0.00269081	0.000574891				107	23							0.142908	0.172152	0.549101	0.308242	0.15406	0.140164	0.163641	0.403466	0.0491236	0.0320519	-0.285938	0.164904
Uniprot ID	Name	Affected in "placebo / sham" according to "signfiance analysis of microarrays"	Replicate 1 , log2 (placebo / sham)	Replicate 2 , log2 (placebo / sham)	Replicate 3 , log2 (placebo / sham)	Replicate 4 , log2 (placebo / sham)	Replicate 1 , log2 (SAR / sham)	Replicate 2 , log2 (SAR / sham)	Replicate 3 , log2 (SAR / sham)	Replicate 4 , log2 (SAR / sham)	Replicate 1 , log2 (SAR / placebo)	Replicate 2 , log2 (SAR / placebo)	Replicate 3 , log2 (SAR / placebo)	Replicate 4 , log2 (SAR / placebo)	SAM affected	name	Average placebo	Average SAR	SEM placebo	SEM SAR	t test	delta > 0.58 upon SAR	SAR and placebo	delta	SAR inreases	SAR dampens	SAM from Mev			Fc 1 placebo	Fc 2 placebo	Fc 3 placebo	Fc 4 placebo	Fc 1 SAR	Fc 2 SAR	Fc 3 SAR	Fc 4 SAR	Fc 1 SAR/placebo	Fc 2 SAR/placebo	Fc 3 SAR / placebo	Fc 4 SAR / placebo
Q61768	Kinesin-1 heavy chain	no	-0.725896	-0.404322	-1.00213	-0.550692	0.382391	0.141801	0.373208	0.588793	0.911017	0.725569	1.23909	1.24316	0	Kinesin-1 heavy chain	-0.670759	0.371548	0.128533	0.0913325	0.000873285	1	1	-1.04231	0	1		Q9R1P1	Proteasome subunit beta type-3	-0.582987	-0.23217	-0.453024	-0.24245	0.536451	0.281965	0.536849	0.992259	0.960141	0.757621	0.953153	1.40806
Q9Z2I0	LETM1 and EF-hand domain-containing protein 1, mitochondrial	no	-0.915537	-1.02295		-0.87783	-0.230918	-0.448409		-0.398321	0.611349	0.0920115		0.544033	0	LETM1 and EF-hand domain-containing protein 1, mitochondrial	-0.938773	-0.359216	0.043474	0.0657583	0.00312263	1	1	-0.579557	0	1		Q9CZN7	Serine hydroxymethyltransferase	-0.772629	-0.850799		-0.569588	-0.0768584	-0.308244		0.00514517	0.660472	0.124063		0.708938
Q9D7G0	Ribose-phosphate pyrophosphokinase 1	no	0.0584746	-0.0713122	0.0945703		0.419606	0.633179	0.431003		0.393953	0.740256	0.35509		0	Ribose-phosphate pyrophosphokinase 1	0.0272443	0.494596	0.0503678	0.0693696	0.00713575	0	0	-0.467352	0	1		P62075	Mitochondrial import inner membrane translocase subunit Tim13	0.201383	0.10084	0.643671		0.573665	0.773343	0.594644		0.443076	0.772308	0.0691523
P52196	Thiosulfate sulfurtransferase;Sulfurtransferase	no	0.560635	0.669356	0.296168	0.225481	-0.113097	0.152275	-0.593858	-0.268356	-0.503392	-0.753354	-0.750618	-0.396436	0	Thiosulfate sulfurtransferase;Sulfurtransferase	0.43791	-0.205759	0.105612	0.155808	0.0173145	1	1	0.643669	1	0		Q00519	Xanthine dehydrogenase/oxidase;Xanthine dehydrogenase;Xanthine oxidase	0.703544	0.841508	0.845269	0.533723	0.0409626	0.29244	-0.430217	0.135111	-0.454269	-0.721302	-1.03656	-0.231532
Q9CQN1	Heat shock protein 75 kDa, mitochondrial	no	-0.0237514	0.559246	0.149562	0.370661	-0.370192	-0.184349	-0.592479	-0.0448458	-0.335006	-0.784926	-0.669067	-0.442246	0	Heat shock protein 75 kDa, mitochondrial	0.263929	-0.297966	0.127294	0.11865	0.0180575	0	0	0.561896	1	0		P63242	Eukaryotic translation initiation factor 5A-1;Eukaryotic translation initiation factor 5A-2	0.119157	0.731398	0.698663	0.678903	-0.216133	-0.0441843	-0.428838	0.35862	-0.285882	-0.752875	-0.955005	-0.277342
Q9D1P4	Cysteine and histidine-rich domain-containing protein 1	no	-0.403924	-0.152748	-0.326544	-0.491062	-0.0630708	-0.17832	-0.0880399	0.0235278	0.264238	0.0644799	0.132331	0.372938	0	Cysteine and histidine-rich domain-containing protein 1	-0.343569	-0.0764756	0.0719371	0.0415194	0.0249942	0	0	-0.267094	0	1		Q3TZ89	Protein transport protein Sec31B	-0.261016	0.0194044	0.222557	-0.182819	0.0909888	-0.0381553	0.0756011	0.426994	0.313362	0.0965318	-0.153607	0.537843
Q9WV35	Probable C->U-editing enzyme APOBEC-2	no	-0.687175	-0.682405	-0.210534	-0.512633	-0.118717	0.0255451	-0.110391	-0.231968	0.603569	0.59378	0.218044	0.324433	0	Probable C->U-editing enzyme APOBEC-2	-0.523187	-0.108883	0.111843	0.0526939	0.0258424	0	0	-0.414304	0	1		Q3U2G2	Heat shock 70 kDa protein 4	-0.544266	-0.510253	0.338567	-0.204391	0.0353423	0.16571	0.0532504	0.171498	0.652693	0.625831	-0.0678935	0.489337
Q9DCL9	Multifunctional protein ADE2;Phosphoribosylaminoimidazole-succinocarboxamide synthase;Phosphoribosylaminoimidazole carboxylase	no	-0.694874	-0.0979844	-0.800657	-0.783016	0.257692	0.406734	-0.195513	-0.257334	0.898505	0.215268	0.660894	0.400693	0	Multifunctional protein ADE2;Phosphoribosylaminoimidazole-succinocarboxamide synthase;Phosphoribosylaminoimidazole carboxylase	-0.594133	0.0528947	0.166993	0.164594	0.0328833	1	1	-0.647028	0	1		Q9QYR9	Acyl-coenzyme A thioesterase 2, mitochondrial	-0.551966	0.0741676	-0.251556	-0.474774	0.411752	0.546899	-0.0318724	0.146132	0.947629	0.24732	0.374956	0.565597
Q9JHR7	Insulin-degrading enzyme	no	0.315579	0.825109	0.661475	0.783821	0.446591	0.219603	0.121584	-0.343054	0.060705	-0.754972	-0.40135	-0.829924	0	Insulin-degrading enzyme	0.646496	0.111181	0.115647	0.166005	0.0426525	0	0	0.535315	1	0		Q9D0R2	Threonine--tRNA ligase, cytoplasmic	0.458487	0.997262	1.21058	1.09206	0.60065	0.359768	0.285225	0.0604124	0.109829	-0.72292	-0.687288	-0.66502
Q8CC13	AP-1 complex subunit beta-1;AP-2 complex subunit beta	no	0.313162	0.41666	-0.083179	0.0296983	0.277189	0.848426	0.532175	0.726931	0.161889	0.160142	1.12823	0.625868	0	AP-1 complex subunit beta-1;AP-2 complex subunit beta	0.169085	0.59618	0.117302	0.124692	0.0470043	0	0	-0.427095	0	1		Q8R4N0	Citrate lyase subunit beta-like protein, mitochondrial	0.45607	0.588812	0.465922	0.33794	0.431248	0.98859	0.695816	1.1304	0.211012	0.192194	0.842295	0.790772
Q3UPL0	Protein transport protein Sec31A	no	-0.0189773	-0.0210945	-0.127514	0.118752	0.261591	0.246021	0.107306	0.604578	0.341984	0.21113	0.399638	0.431745	0	Protein transport protein Sec31A	-0.0122085	0.304874	0.0504735	0.105748	0.049772	0	0	-0.317083	0	1		Q9WVE8	Protein kinase C and casein kinase substrate in neurons protein 2	0.123931	0.151058	0.421587	0.426994	0.41565	0.386186	0.270947	1.00804	0.391108	0.243181	0.1137	0.596649
Q91XF0	Pyridoxine-5-phosphate oxidase	no	0.330099	-0.161829	0.184513	0.198766	-0.0960895	-0.12428	-0.348279	-0.142554	-0.340433	-0.181188	-0.250502	-0.418437	0	Pyridoxine-5-phosphate oxidase	0.137888	-0.1778	0.105141	0.057624	0.0497872	0	0	0.315688	1	0		P48036	Annexin A5	0.473008	0.0103233	0.733615	0.507009	0.0579701	0.0158847	-0.184638	0.260912	-0.291309	-0.149137	-0.53644	-0.253532
P53994	Ras-related protein Rab-2A;Ras-related protein Rab-2B	no	0.0944106	0.699528	0.846071	0.606687	-0.540396	0.366127	-0.464107	0.141158	-0.729668	-0.218987	-1.40405	-0.553279	0	Ras-related protein Rab-2A;Ras-related protein Rab-2B	0.561674	-0.124305	0.163362	0.223531	0.0516393	1	1	0.685979	1	0		Q91YT0	NADH dehydrogenase [ubiquinone] flavoprotein 1, mitochondrial	0.237319	0.87168	1.39517	0.914929	-0.386336	0.506291	-0.300466	0.544624	-0.680544	-0.186935	-1.68999	-0.388374
P62821	Ras-related protein Rab-1A	no	0.303242		0.98027	0.597495	-0.320611		-0.14074	0.22733	-0.642718		-1.02424	-0.20977	0	Ras-related protein Rab-1A	0.627002	-0.0780072	0.195997	0.161257	0.0520209	1	1	0.705009	1	0	Q9D1H9	Q99JX3	Golgi reassembly-stacking protein 2	0.44615		1.52937	0.905737	-0.166551		0.0229004	0.630796	-0.593594		-1.31018	-0.0448658
Q6NZJ6	Eukaryotic translation initiation factor 4 gamma 1	no	-0.198635	0.142258	0.271793	1.04261	-0.263216	0.0166396	-0.839867	-0.828711	0.199047	-0.0768135	-0.735398	-1.82353	0	Eukaryotic translation initiation factor 4 gamma 1	0.314507	-0.478789	0.262194	0.213062	0.0589759	1	1	0.793296	1	0	Q3TLP8	E9QN99	Abhydrolase domain-containing protein 14B	-0.0557263	0.31441	0.820894	1.35085	-0.109157	0.156804	-0.676226	-0.425245	0.24817	-0.0447616	-1.02134	-1.65863
P06330	Ig heavy chain V region AC38 205.12;Ig heavy chain V region MOPC 104E;Ig heavy chain V region J558	no	2.02679		1.14243	0.0817005	-0.00506043		-1.13909	-1.07004	-1.97374		-2.51143	-0.987127	0	Ig heavy chain V region AC38 205.12;Ig heavy chain V region MOPC 104E;Ig heavy chain V region J558	1.08364	-0.738065	0.562269	0.367044	0.0627948	1	1	1.82171	1	0		D3YXK8	Eukaryotic translation initiation factor 1;Eukaryotic translation initiation factor 1b	2.1697		1.69153	0.389943	0.148999		-0.975453	-0.666575	-1.92462		-2.79736	-0.822222
P01837	Ig kappa chain C region	no	2.23116	0.796481	2.10801	0.295533	-0.159017	0.453299	-0.0435545	-0.128553	-2.33817	-0.323644	-2.1059	-0.37963	0	Ig kappa chain C region	1.3578	0.0305437	0.48037	0.14302	0.0650547	1	1	1.32725	1	0		Q8C6I2	Succinate dehydrogenase assembly factor 2, mitochondrial	2.37407	0.968633	2.65711	0.603775	-0.00495696	0.593463	0.120086	0.274913	-2.28905	-0.291592	-2.39183	-0.214726
Q3U3J1	2-oxoisovalerate dehydrogenase subunit alpha, mitochondrial	no	-0.0490778	-0.386152	-0.90737	0.0246924	0.971062	-0.406561	0.888288	1.03872	0.836217	-0.319271	1.55957	1.02052	0	2-oxoisovalerate dehydrogenase subunit alpha, mitochondrial	-0.329477	0.622876	0.212374	0.344522	0.0653861	1	1	-0.952354	0	1		Q9CR98	Protein FAM136A	0.0938305	-0.214	-0.358269	0.332935	1.12512	-0.266397	1.05193	1.44218	0.88534	-0.287219	1.27364	1.18542
Q61033	Lamina-associated polypeptide 2, isoforms alpha/zeta;Lamina-associated polypeptide 2, isoforms beta/delta/epsilon/gamma	no	-0.218702	-0.823192		-0.0399814	-0.940258	-1.09272		-1.31658	-0.851007	-0.17619		-0.698209	0	Lamina-associated polypeptide 2, isoforms alpha/zeta;Lamina-associated polypeptide 2, isoforms beta/delta/epsilon/gamma	-0.360625	-1.11652	0.236968	0.109283	0.0677013	1	1	0.755893	1	0		E9PX42	Glyceraldehyde-3-phosphate dehydrogenase	-0.0757937	-0.65104		0.268261	-0.786199	-0.952557		-0.91311	-0.801883	-0.144138		-0.533305
Q61937	Nucleophosmin	no	-1.01037	-0.875341		-0.597959	-1.24185	-1.29092		-1.04464	-0.157798	-0.281497		-0.484292	0	Nucleophosmin	-0.82789	-1.19247	0.121394	0.0752598	0.0753155	0	0	0.364582	1	0		P49442	Inositol polyphosphate 1-phosphatase	-0.867463	-0.703189		-0.289716	-1.0878	-1.15075		-0.641176	-0.108674	-0.249445		-0.319388
D3Z5N4	Glycogenin-1	no	-0.470293	-0.495119	-0.622904	-0.597959	-0.361821	-0.33589	0.180051	-0.320172	0.0971405	0.206123	0.929979	0.348991	0	Glycogenin-1	-0.546569	-0.209458	0.0375646	0.13012	0.0765766	0	0	-0.337111	0	1		Q8C845	EF-hand domain-containing protein D2	-0.327385	-0.322966	-0.0738032	-0.289716	-0.207761	-0.195726	0.343692	0.0832941	0.146264	0.238175	0.644041	0.513895
O35386	Phytanoyl-CoA dioxygenase, peroxisomal	no	0.16452	0.37481		-0.0969111	-0.691023	-0.102973		-0.924316	-1.07116	-0.379726		-0.735862	0	Phytanoyl-CoA dioxygenase, peroxisomal	0.147473	-0.572771	0.136441	0.244362	0.0786437	1	1	0.720244	1	0		Q62523	Zyxin	0.307428	0.546962		0.211331	-0.536964	0.0371919		-0.52085	-1.02204	-0.347674		-0.570957
P15626	Glutathione S-transferase Mu 2	no	0.128995	0.353324	-0.1666	0.267244	-0.408951	-0.185468	0.0692654	-0.128029	-0.591834	-0.551994	0.206948	-0.385485	0	Glutathione S-transferase Mu 2	0.145741	-0.163296	0.113905	0.0983898	0.0868546	0	0	0.309037	1	0		Q6ZQ38	Cullin-associated NEDD8-dissociated protein 1	0.271904	0.525476	0.382501	0.575486	-0.254892	-0.0453032	0.232906	0.275437	-0.54271	-0.519942	-0.0789903	-0.220581
Q9Z1Z2	Serine-threonine kinase receptor-associated protein	no	-0.0913274	-0.391367	-0.324444	-0.334971	-0.0788692	-0.026379	-0.131117	-0.237595	-0.0270753	0.155716	-0.0124687	0.271258	0	Serine-threonine kinase receptor-associated protein	-0.285527	-0.11849	0.0663795	0.0450922	0.0888875	0	0	-0.167037	0	1		Q2TPA8	Hydroxysteroid dehydrogenase-like protein 2	0.0515809	-0.219215	0.224658	-0.0267293	0.0751904	0.113785	0.032524	0.165871	0.0220482	0.187768	-0.298407	0.436162
Q9JKR6	Hypoxia up-regulated protein 1	no	0.745241	0.338326	0.416738		0.140488	0.215167	0.064716		-0.358304	-0.0234216	-0.417423		0	Hypoxia up-regulated protein 1	0.500102	0.140124	0.124642	0.0434319	0.088955	0	0	0.359978	1	0		P11404	Fatty acid-binding protein, heart	0.888149	0.510478	0.96584		0.294547	0.355332	0.228357		-0.309181	0.00863036	-0.703361
Q9CX34	Suppressor of G2 allele of SKP1 homolog	no	0.0521872	0.102028	-0.206547		-0.479472	-0.127049	-0.426127		-0.433048	0.251277	-0.339351		0	Suppressor of G2 allele of SKP1 homolog	-0.0174436	-0.344216	0.0956399	0.10967	0.089312	0	0	0.326772	1	0		Q5EBG6	Heat shock protein beta-6	0.195096	0.27418	0.342555		-0.325413	0.0131159	-0.262486		-0.383925	0.283329	-0.625289
A2BFF9	Cytoplasmic dynein 1 intermediate chain 2	no	-0.471108	-0.12023	-0.314477	-0.154122	0.0705981	0.320999	-0.158025	-0.151189	0.451577	0.506784	-0.541395	0.0758374	0	Cytoplasmic dynein 1 intermediate chain 2	-0.264984	0.0205959	0.080716	0.113342	0.090983	0	0	-0.28558	0	1	P19096	Q8VDG5	Phosphopantothenate--cysteine ligase	-0.328199	0.0519225	0.234624	0.154121	0.224658	0.461164	0.00561564	0.252277	0.5007	0.538836	-0.827333	0.240742
P61082	NEDD8-conjugating enzyme Ubc12	no	0.174512	-0.127777	0.104601	-0.125538	0.0326945	-0.287732	-0.369687	-0.305007	-0.168618	-0.229569	-0.487332	-0.338533	0	NEDD8-conjugating enzyme Ubc12	0.00644929	-0.232433	0.0781644	0.0901185	0.0930619	0	0	0.238882	1	0		Q5SXR6	Clathrin heavy chain 1	0.31742	0.0443747	0.653702	0.182704	0.186754	-0.147567	-0.206046	0.0984592	-0.119495	-0.197517	-0.77327	-0.173628
P61087	Ubiquitin-conjugating enzyme E2 K	no		0.673809	0.310232	0.692364		0.00131348	-0.889851	0.0366798		-0.453548	-1.04689	-0.619825	0	Ubiquitin-conjugating enzyme E2 K	0.558802	-0.283952	0.1244	0.303121	0.0931258	1	1	0.842754	1	0		Q9WUR2	Enoyl-CoA delta isomerase 2, mitochondrial		0.845961	0.859333	1.00061		0.141478	-0.72621	0.440146		-0.421496	-1.33282	-0.454921
Q9D2G2	Dihydrolipoyllysine-residue succinyltransferase component of 2-oxoglutarate dehydrogenase complex, mitochondrial	no	-0.769778	-0.806466	-0.702724	-0.895799	0.21264	-0.356029	-0.214965	-0.810438	1.16755	0.383707	0.564399	0.116764	0	Dihydrolipoyllysine-residue succinyltransferase component of 2-oxoglutarate dehydrogenase complex, mitochondrial	-0.793692	-0.292198	0.0402451	0.210846	0.0956316	0	0	-0.501494	0	1		Q8CDN6	Thioredoxin-like protein 1	-0.62687	-0.634314	-0.153623	-0.587557	0.3667	-0.215865	-0.0513244	-0.406972	1.21667	0.415759	0.278461	0.281669
P40936	Indolethylamine N-methyltransferase	no	-0.361926	0.0707222	-0.555318	-0.326164	-0.668076	-0.581542	-1.01605	-2.04038	-0.43254	-0.745431	-0.504172	-1.54554	0	Indolethylamine N-methyltransferase	-0.293172	-1.07651	0.131325	0.334728	0.096606	1	1	0.78334	1	0		Q921I1	Serotransferrin	-0.219018	0.242874	-0.00621696	-0.017922	-0.514017	-0.441377	-0.852407	-1.63691	-0.383416	-0.713379	-0.79011	-1.38063
Q6P9R2	Serine/threonine-protein kinase OSR1	no	-0.484135	-0.617773	-0.337217	-0.862291	-0.717812	-0.999021	-0.681474	-1.18218	-0.17531	-0.451713	-0.198773	-0.468198	0	Serine/threonine-protein kinase OSR1	-0.575354	-0.895122	0.111491	0.119122	0.097922	0	0	0.319768	1	0		Q9WVJ2	26S proteasome non-ATPase regulatory subunit 13	-0.341226	-0.445621	0.211884	-0.554049	-0.563753	-0.858856	-0.517833	-0.778713	-0.126187	-0.419662	-0.484711	-0.303294
Q91ZA3	Propionyl-CoA carboxylase alpha chain, mitochondrial	no	-0.184058	0.0160481	-0.900065	-1.05412	1.72952	0.0978866	0.0938525	-0.0320625	1.37784	0.00244548	1.13241	0.914867	0	Propionyl-CoA carboxylase alpha chain, mitochondrial	-0.53055	0.4723	0.262916	0.420158	0.0985296	1	1	-1.00285	0	1		D3YTT7	40S ribosomal protein SA	-0.0411499	0.1882	-0.350964	-0.745883	1.88358	0.238051	0.257493	0.371404	1.42696	0.0344974	0.846473	1.07977
Q3U111	Radixin	no	-0.769644	-1.37008	-0.795634	-1.1478	-0.820178	-0.873345	-0.436078	-0.52541	-0.16099	0.342459	0.539806	0.206822	0	Radixin	-1.02079	-0.663753	0.144886	0.10777	0.0993457	0	0	-0.357036	0	1		P97371	Proteasome activator complex subunit 1	-0.626736	-1.19793	-0.246532	-0.839557	-0.666118	-0.733181	-0.272437	-0.121944	-0.111867	0.374511	0.253868	0.371726
P03953	Complement factor D	no	0.567441	-0.026818		-0.217455	-0.30366	-0.498898		-0.756564	-0.719093	-0.511484		-0.560188	0	Complement factor D	0.107723	-0.519707	0.236355	0.131155	0.0994652	1	1	0.62743	1	0	F7CK47	A3KG59	Peptidase M20 domain-containing protein 2	0.710349	0.145334		0.0907875	-0.149601	-0.358734		-0.353097	-0.669969	-0.479432		-0.395284
Q99JY9	Actin-related protein 3	no	0.382559	0.499287	0.56979	0.789028	0.485358	1.09872	1.10228	1.54891	0.217273	0.473737	0.383009	0.806612	0	Actin-related protein 3	0.560166	1.05882	0.0854989	0.218428	0.102477	0	0	-0.498651	0	1		Q99LD8	N(G),N(G)-dimethylarginine dimethylaminohydrolase 2	0.525467	0.671439	1.11889	1.09727	0.639417	1.23889	1.26592	1.95238	0.266397	0.505789	0.0970714	0.971516
Q60936	Chaperone activity of bc1 complex-like, mitochondrial	no	0.502793	1.19145	0.638477	1.76679	0.138604	0.318578	-0.221843	0.942502	-0.252509	-0.720526	-0.222835	-0.729809	0	Chaperone activity of bc1 complex-like, mitochondrial	1.02488	0.29446	0.288684	0.243482	0.102642	1	1	0.730418	1	0		Q91X72	Hemopexin	0.645702	1.3636	1.18758	2.07503	0.292664	0.458743	-0.0582025	1.34597	-0.203386	-0.688474	-0.508773	-0.564905
Q9JKS4	LIM domain-binding protein 3	no	-1.11896	-1.29952	-0.628229	-1.04489	0.248663	-0.866734	-0.232018	-0.814133	1.00503	0.585435	0.347645	0.37552	0	LIM domain-binding protein 3	-1.0229	-0.416056	0.142008	0.264149	0.103849	1	1	-0.606844	0	1		Q61206	Platelet-activating factor acetylhydrolase IB subunit beta	-0.976049	-1.12737	-0.0791275	-0.736648	0.402722	-0.72657	-0.0683774	-0.410667	1.05415	0.617487	0.0617071	0.540424
Q5SW19	Protein KIAA0664	no	-0.0765091	0.170427	-1.20132	-0.898772	0.037882	0.763169	0.00923055	0.1404	0.164753	0.686211	1.12815	1.02103	0	Protein KIAA0664	-0.501544	0.23767	0.326558	0.177414	0.107942	1	1	-0.739214	0	1		P61082	NEDD8-conjugating enzyme Ubc12	0.0663992	0.342579	-0.652221	-0.59053	0.191942	0.903333	0.172872	0.543867	0.213876	0.718263	0.842214	1.18593
Q99KQ4	Nicotinamide phosphoribosyltransferase	no	0.47749	0.934905	-0.37214	0.181262	-0.199625	-0.132034	-0.337969	-0.551033	-0.667796	-0.96158	0.172683	-0.675855	0	Nicotinamide phosphoribosyltransferase	0.305379	-0.305165	0.273916	0.0924845	0.108382	1	1	0.610545	1	0		Q9D0K2	Succinyl-CoA:3-ketoacid-coenzyme A transferase 1, mitochondrial	0.620399	1.10706	0.176961	0.489504	-0.0455655	0.00813082	-0.174328	-0.147567	-0.618672	-0.929528	-0.113255	-0.51095
P61089	Ubiquitin-conjugating enzyme E2 N	no	0.191546	-0.471748	0.375911	0.254424	-0.0894527	-0.877246	-0.918243	-0.063062	-0.259636	-0.363461	-1.44436	-0.331796	0	Ubiquitin-conjugating enzyme E2 N	0.0875329	-0.487001	0.190313	0.237352	0.110177	1	1	0.574534	1	0		Q60994	Adiponectin	0.334454	-0.299596	0.925012	0.562666	0.0646069	-0.737081	-0.754602	0.340404	-0.210513	-0.331409	-1.7303	-0.166891
Q8BMS4	Hexaprenyldihydroxybenzoate methyltransferase, mitochondrial	no	-0.0877126	0.387767	-0.242839	-0.0264174	1.01343	0.397134	0.106589	0.322719	1.17368	0.105583	0.572583	0.465222	0	Hexaprenyldihydroxybenzoate methyltransferase, mitochondrial	0.00769963	0.459967	0.134626	0.194503	0.110436	0	0	-0.452268	0	1		P97352	Protein S100-A13	0.0551957	0.55992	0.306262	0.281825	1.16749	0.537299	0.27023	0.726186	1.2228	0.137635	0.286645	0.630126
Q9D0R2	Threonine--tRNA ligase, cytoplasmic	no		0.549031	0.0242734	0.800619		1.23619	0.706941	1.74233		0.53218	0.800338	1.05499	0	Threonine--tRNA ligase, cytoplasmic	0.457974	1.22849	0.228689	0.298916	0.114812	1	1	-0.770514	0	1		Q9WV35	Probable C->U-editing enzyme APOBEC-2		0.721183	0.573375	1.10886		1.37636	0.870582	2.1458		0.564232	0.5144	1.2199
Q9CQA3	Succinate dehydrogenase [ubiquinone] iron-sulfur subunit, mitochondrial	no	-0.0977449	0.132032	-0.867625	0.153856	0.209392	0.565194	0.200147	0.408133	0.241537	0.278637	0.946684	0.229829	0	Succinate dehydrogenase [ubiquinone] iron-sulfur subunit, mitochondrial	-0.16987	0.345716	0.239445	0.0874839	0.117123	0	0	-0.515587	0	1		Q9CQ75	NADH dehydrogenase [ubiquinone] 1 alpha subcomplex subunit 2	0.0451634	0.304184	-0.318524	0.462098	0.363451	0.705359	0.363788	0.811599	0.29066	0.310689	0.660746	0.394734
Q1XH17	Tripartite motif-containing protein 72	no	0.505925	0.442958	0.311901	0.211927	0.854068	0.400215	0.685798	0.462865	0.312757	-0.164978	0.386512	0.570011	0	Tripartite motif-containing protein 72	0.368178	0.600737	0.0659215	0.104335	0.117458	0	0	-0.232559	0	1	Q8CI94	P47811	Mitogen-activated protein kinase 14	0.648833	0.61511	0.861003	0.520169	1.00813	0.54038	0.849439	0.866331	0.361881	-0.132926	0.100574	0.734916
P10649	Glutathione S-transferase Mu 1	no	0.108902	0.23416	-0.36108	-0.0707015	-0.521252	-0.193415	-0.122678	-0.440778	-0.607215	-0.637735	0.226939	-0.322336	0	Glutathione S-transferase Mu 1	-0.0221801	-0.319531	0.129132	0.0957637	0.11798	0	0	0.297351	1	0		E9PZF0	Nucleoside diphosphate kinase;Nucleoside diphosphate kinase B	0.25181	0.406312	0.188021	0.237541	-0.367192	-0.0532504	0.0409626	-0.037312	-0.558092	-0.605683	-0.0589989	-0.157432
P0CG50	Polyubiquitin-C;Ubiquitin;Ubiquitin-related 1;Ubiquitin-related 2;Polyubiquitin-B;Ubiquitin;Ubiquitin-40S ribosomal protein S27a;Ubiquitin;40S ribosomal protein S27a;Ubiquitin-60S ribosomal protein L40;Ubiquitin;60S ribosomal protein L40	no	-0.0349526	0.061363	0.635687	-0.521869	-0.339813	-0.233184	-0.643355	-0.68644	-0.257451	-0.349515	-1.29054	-0.208149	0	Polyubiquitin-C;Ubiquitin;Ubiquitin-related 1;Ubiquitin-related 2;Polyubiquitin-B;Ubiquitin;Ubiquitin-40S ribosomal protein S27a;Ubiquitin;40S ribosomal protein S27a;Ubiquitin-60S ribosomal protein L40;Ubiquitin;60S ribosomal protein L40	0.035057	-0.475698	0.237437	0.111728	0.119024	0	0	0.510755	1	0		P50580	Proliferation-associated protein 2G4	0.107956	0.233515	1.18479	-0.213627	-0.185753	-0.0930192	-0.479714	-0.282973	-0.208328	-0.317463	-1.57648	-0.0432445
Q8C266	Ras-related protein Rab-5C;Ras-related protein Rab-5B;Ras-related protein Rab-5A	no	0.422396	0.631241	0.694751	0.250104	0.403326	0.423461	0.0899853	0.0533151	-0.152673	-0.232948	-0.691616	-0.0453489	0	Ras-related protein Rab-5C;Ras-related protein Rab-5B;Ras-related protein Rab-5A	0.499623	0.242522	0.101498	0.0990216	0.119784	0	0	0.257101	1	0		P31428	Dipeptidase 1	0.565305	0.803393	1.24385	0.558346	0.557386	0.563625	0.253626	0.456781	-0.10355	-0.200896	-0.977554	0.119555
P70195	Proteasome subunit beta type-7	no	-0.0543595	-0.265712	-0.19951	-0.242026	0.127728	-0.0279548	-0.156445	-0.125023	0.122724	0.0805815	0.06608	0.0693518	0	Proteasome subunit beta type-7	-0.190402	-0.0454238	0.0473702	0.0638673	0.122224	0	0	-0.144978	0	1		Q64152	Transcription factor BTF3	0.0885487	-0.0935602	0.349592	0.0662159	0.281787	0.11221	0.00719549	0.278444	0.171847	0.112633	-0.219858	0.234256
O88569	Heterogeneous nuclear ribonucleoproteins A2/B1	no	-0.231777	-0.766701	-0.327162	-0.432438	-0.0247107	-0.354662	-0.326505	0.0795908	0.223497	0.239852	0.237749	0.63733	0	Heterogeneous nuclear ribonucleoproteins A2/B1	-0.439519	-0.156572	0.116504	0.108504	0.126104	0	0	-0.282948	0	1		Q5SW19	Protein KIAA0664	-0.0888684	-0.594549	0.221939	-0.124196	0.129349	-0.214498	-0.162864	0.483057	0.27262	0.271904	-0.0481885	0.802235
O54724	Polymerase I and transcript release factor	no	-0.0597971	-0.211712	0.417772	-0.076473	0.119635	-0.423612	-0.746002	-0.512626	-0.201223	-0.285619	-1.16332	-0.15255	0	Polymerase I and transcript release factor	0.0174476	-0.390651	0.137708	0.183174	0.129037	0	0	0.408099	1	0		P15116	Cadherin-2	0.0831111	-0.0395595	0.966873	0.231769	0.273695	-0.283448	-0.582361	-0.10916	-0.152099	-0.253567	-1.44926	0.0123541
Q9Z1P6	NADH dehydrogenase [ubiquinone] 1 alpha subcomplex subunit 7	no	-0.840151	-2.09754	-2.16811	-0.345554	0.784715	-1.40073	-0.126048	-0.230391	1.71493	0.495219	1.60856	-0.0754061	0	NADH dehydrogenase [ubiquinone] 1 alpha subcomplex subunit 7	-1.36284	-0.243114	0.456099	0.44818	0.13051	1	1	-1.11972	0	1		F6XUP5	Ubiquitin-fold modifier 1	-0.697242	-1.92539	-1.61901	-0.037312	0.938775	-1.26057	0.037593	0.173075	1.76405	0.527271	1.32262	0.0894982
E9QK49	Eukaryotic peptide chain release factor GTP-binding subunit ERF3A;Eukaryotic peptide chain release factor GTP-binding subunit ERF3B	no	-0.449357	-0.984691	-0.6748	-1.06416	-0.227104	-0.539718	0.117197	-0.797871	0.263774	0.126027	0.693563	0.068493	0	Eukaryotic peptide chain release factor GTP-binding subunit ERF3A;Eukaryotic peptide chain release factor GTP-binding subunit ERF3B	-0.793251	-0.361874	0.142107	0.197778	0.13191	0	0	-0.431377	0	1		Q9CQR4	Acyl-coenzyme A thioesterase 13	-0.306448	-0.812539	-0.125699	-0.755913	-0.0730442	-0.399554	0.280838	-0.394404	0.312897	0.158079	0.407625	0.233397
Q9WVL0	Maleylacetoacetate isomerase	no	-0.196073	0.543168	-0.0299619	-0.0388342	-0.190926	0.0609473	-0.709886	-0.522357	-0.0157535	-0.509775	-0.545343	-0.554903	0	Maleylacetoacetate isomerase	0.0695748	-0.340556	0.162409	0.171525	0.133345	0	0	0.41013	1	0		Q8QZS1	3-hydroxyisobutyryl-CoA hydrolase, mitochondrial	-0.0531644	0.71532	0.519139	0.269408	-0.0368662	0.201112	-0.546245	-0.118891	0.0333701	-0.477723	-0.831281	-0.389999
Q8CHP8	Phosphoglycolate phosphatase	no		0.204674	0.0466888	-0.195019		0.525931	0.102996	0.379353		-0.199575	-0.06707	0.239127	0	Phosphoglycolate phosphatase	0.0187814	0.336093	0.116222	0.123992	0.135577	0	0	-0.317312	0	1		P16045	Galectin-1		0.376826	0.59579	0.113224		0.666095	0.266637	0.782819		-0.167523	-0.353008	0.404031
P31001	Desmin	no		-1.39508	-0.113899	-0.843001		0.0333827	0.203506	0.0824368		1.0996	0.611094	0.888902	0	Desmin	-0.783993	0.106442	0.37102	0.0505559	0.136006	1	1	-0.890435	0	1		O08795	Glucosidase 2 subunit beta		-1.22293	0.435202	-0.534759		0.173547	0.367147	0.485903		1.13166	0.325156	1.05381
P11352	Glutathione peroxidase 1	no	0.793456	1.15748	1.33295	0.288228	0.481277	0.803946	0.0354817	0.277193	-0.32909	-0.250734	-1.11753	-0.0389888	0	Glutathione peroxidase 1	0.89303	0.399474	0.23079	0.16272	0.136651	0	0	0.493555	1	0		Q8VDQ1	Prostaglandin reductase 2	0.936365	1.32963	1.88206	0.596471	0.635336	0.94411	0.199123	0.680659	-0.279967	-0.218682	-1.40347	0.125916
Q64339	Ubiquitin-like protein ISG15	no	0.970326	0.38509	1.3707		0.272259	0.368342	0.095059		-0.496786	0.0539166	-1.23894		0	Ubiquitin-like protein ISG15	0.908704	0.24522	0.286184	0.0800399	0.13793	1	1	0.663484	1	0		P14602	Heat shock protein beta-1	1.11323	0.557242	1.9198		0.426318	0.508506	0.2587		-0.447662	0.0859685	-1.52487
Q6W8Q3	Purkinje cell protein 4-like protein 1	no	-0.066486	-1.66026	-3.49552	-1.59524	0.375012	-1.53873	1.64454	-0.649692	0.418156	0.347569	5.00183	0.970368	0	Purkinje cell protein 4-like protein 1	-1.70438	-0.0422189	0.70147	0.684824	0.140939	1	1	-1.66216	0	1		Q9D4E6	Polyadenylate-binding protein 1	0.0764222	-1.4881	-2.94642	-1.287	0.529071	-1.39857	1.80818	-0.246226	0.46728	0.379621	4.71589	1.13527
Q8R2P8	Lysyl-tRNA synthetase;Lysine--tRNA ligase	no	-0.206408	0.115684	-0.0202298	0.73365	0.346946	0.75097	0.29904	1.09455	0.683623	0.0424535	0.405095	0.361165	0	Lysyl-tRNA synthetase;Lysine--tRNA ligase	0.155674	0.622876	0.203654	0.187059	0.14243	0	0	-0.467202	0	1		Q6A0C7	Ras-related protein Rab-21	-0.0634996	0.287836	0.528871	1.04189	0.501006	0.891134	0.462681	1.49802	0.732747	0.0745054	0.119157	0.526069
Q921I1	Serotransferrin	no	0.208381	0.676639	0.940134	0.526714	0.080319	0.411696	0.266109	0.384799	-0.162815	-0.276481	-0.679283	-0.164471	0	Serotransferrin	0.587967	0.285731	0.152677	0.0754214	0.144311	0	0	0.302236	1	0	F8VQ43	E9QA63	Microtubule-actin cross-linking factor 1	0.351289	0.848791	1.48924	0.834956	0.234379	0.55186	0.42975	0.788265	-0.113692	-0.244429	-0.965221	0.000432815
Q8C878	NEDD8-activating enzyme E1 catalytic subunit	no	-0.219036	-0.390871	-0.217969	-0.519254	0.0104693	0.185773	0.077345	-0.471931	0.207404	0.269302	0.147385	-0.0816569	0	NEDD8-activating enzyme E1 catalytic subunit	-0.336783	-0.0495859	0.073145	0.145341	0.145341	0	0	-0.287197	0	1	O89053	Q9CZ44	NSFL1 cofactor p47	-0.0761282	-0.218719	0.331132	-0.211012	0.164529	0.325937	0.240986	-0.0684644	0.256528	0.301354	-0.138553	0.0832474
Q8R5L1	Complement component 1 Q subcomponent-binding protein, mitochondrial	no	-0.167161	-0.556533	-0.877264	-0.307665	1.22545	-0.67293	0.395214	0.17883	1.51501	-0.339071	1.22147	0.395224	0	Complement component 1 Q subcomponent-binding protein, mitochondrial	-0.477156	0.281641	0.155781	0.390027	0.146312	1	1	-0.758797	0	1		Q8BVU5	ADP-ribose pyrophosphatase, mitochondrial	-0.0242524	-0.384381	-0.328163	0.000577203	1.37951	-0.532766	0.558855	0.582296	1.56413	-0.307019	0.935535	0.560128
P97372	Proteasome activator complex subunit 2	no	0.300486	-0.454058	1.04578		-0.100114	-1.43947	-0.705175		-0.381513	-0.915474	-1.55464		0	Proteasome activator complex subunit 2	0.297403	-0.748252	0.432969	0.387237	0.1471	1	1	1.04566	1	0		Q64442	Sorbitol dehydrogenase	0.443395	-0.281906	1.59488		0.0539454	-1.2993	-0.541534		-0.332389	-0.883422	-1.84058
Q91VI7	Ribonuclease inhibitor	no	-0.178739	-0.105075	0.566065	-0.13222	0.564028	0.335812	0.624794	0.077173	0.74681	0.2093	0.138384	0.0870268	0	Ribonuclease inhibitor	0.0375078	0.400452	0.176841	0.124423	0.149876	0	0	-0.362944	0	1		O70250	Phosphoglycerate mutase 2	-0.0358306	0.0670771	1.11517	0.176022	0.718088	0.475976	0.788435	0.480639	0.795933	0.241352	-0.147554	0.251931
P26645	Myristoylated alanine-rich C-kinase substrate	no	0.140539	-0.0777803	0.368216	0.0549546	0.34613	0.568963	0.532264	0.0469731	-0.0469611	0.723092	0.0815718	0.166113	0	Myristoylated alanine-rich C-kinase substrate	0.121482	0.373583	0.0937071	0.119297	0.15038	0	0	-0.2521	0	1		P97429	Annexin A4;Annexin	0.283448	0.0943718	0.917317	0.363197	0.50019	0.709127	0.695905	0.450439	0.00216244	0.755144	-0.204366	0.331017
Q06770	Corticosteroid-binding globulin	no	0.534713	-0.368759	1.7485	-0.233968	-0.313375	-0.620843	-0.293406	-0.787848	-0.833383	-0.48727	-2.0404	-0.13775	0	Corticosteroid-binding globulin	0.420122	-0.503868	0.485446	0.12073	0.151708	1	1	0.92399	1	0		E9Q616		0.677621	-0.196607	2.2976	0.074274	-0.159315	-0.480679	-0.129766	-0.384381	-0.784259	-0.455218	-2.32633	0.0271541
Q8K010	5-oxoprolinase	no	-0.294302	0.286988	-0.400492		0.682268	0.175358	0.190473		1.03718	0.117468	0.533622		0	5-oxoprolinase	-0.135936	0.349366	0.213672	0.166508	0.151955	0	0	-0.485302	0	1		Q99JI4	26S proteasome non-ATPase regulatory subunit 6	-0.151394	0.45914	0.148609		0.836328	0.315522	0.354114		1.08631	0.149519	0.247685
P39054	Dynamin-2;Dynamin-1;Dynamin-3	no	0.42668	1.26752	1.34543		0.429363	0.702197	-0.239359		-0.0153306	-0.40215	-1.40988		0	Dynamin-2;Dynamin-1;Dynamin-3	1.01321	0.2974	0.294126	0.279698	0.152758	1	1	0.715809	1	0		Q544X6	Ferrochelatase;Ferrochelatase, mitochondrial	0.569588	1.43968	1.89453		0.583423	0.842361	-0.0757176		0.033793	-0.370098	-1.69582
Q923D2	Flavin reductase (NADPH)	no	0.130309		0.348991	0.592395	0.0161219		-0.163497	0.260319	-0.108002		-0.866001	-0.352201	0	Flavin reductase (NADPH)	0.357232	0.0376481	0.133456	0.122818	0.153341	0	0	0.319584	1	0		Q99KJ8	Dynactin subunit 2	0.273218		0.898092	0.900637	0.170182		0.000144286	0.663785	-0.0588787		-1.15194	-0.187296
E9QP49	EH domain-binding protein 1-like protein 1	no	-1.14678	-0.935988	-0.512633	-0.68431	-0.290993	-0.553109	-0.588561	-0.732647	0.816795	0.595835	-0.177989	-0.158858	0	EH domain-binding protein 1-like protein 1	-0.819928	-0.541328	0.139381	0.0920327	0.15395	0	0	-0.2786	0	1		B9EIE8	LYR motif-containing protein 7	-1.00387	-0.763836	0.0364681	-0.376068	-0.136934	-0.412944	-0.42492	-0.329181	0.865919	0.627887	-0.463927	0.0060466
E9QPE4	Meiosis arrest female protein 1	no	-0.518274	-0.218154	-0.45419		-0.100531	0.49791	-0.198584		0.856612	0.389212	0.0421756		0	Meiosis arrest female protein 1	-0.396873	0.0662648	0.091254	0.217671	0.155329	0	0	-0.463137	0	1	Q91ZX7	F6SY09	Alpha-2-macroglobulin receptor-associated protein	-0.375366	-0.0460021	0.0949116		0.0535284	0.638074	-0.0349435		0.905736	0.421264	-0.243762
Q9D0I9	Arginine--tRNA ligase, cytoplasmic	no	-0.35227	0.866684	0.309914	0.0203377	0.723371	1.04046	0.264501	0.848176	0.515401	0.302631	0.0948254	0.562363	0	Arginine--tRNA ligase, cytoplasmic	0.211167	0.719127	0.25712	0.164978	0.155968	0	0	-0.507961	0	1		Q8CGA0	Protein phosphatase 1F	-0.209361	1.03884	0.859015	0.32858	0.87743	1.18063	0.428142	1.25164	0.564524	0.334683	-0.191112	0.727267
P19783	Cytochrome c oxidase subunit 4 isoform 1, mitochondrial	no	0.196457	0.906716	1.17878	0.958734	1.5543	1.01518	0.983079	1.36245	1.20632	-0.0488996	-0.292798	0.246847	0	Cytochrome c oxidase subunit 4 isoform 1, mitochondrial	0.810171	1.22875	0.212898	0.138392	0.158458	0	0	-0.418582	0	1		P10639	Thioredoxin	0.339365	1.07887	1.72788	1.26698	1.70836	1.15534	1.14672	1.76592	1.25544	-0.0168476	-0.578736	0.411752
P97384	Annexin A11;Annexin	no	-0.243562	0.110269	0.00720556	0.189101	-0.142564	0.00698978	-0.40783	-0.213144	0.0277092	-0.323079	-0.303048	-0.454255	0	Annexin A11;Annexin	0.0157534	-0.189137	0.0941189	0.0861384	0.159804	0	0	0.204891	1	0		D3Z5N4	Glycogenin-1	-0.100654	0.282421	0.556307	0.497343	0.0114957	0.147154	-0.244189	0.190322	0.0768327	-0.291027	-0.588986	-0.289351
Q91VD9	NADH-ubiquinone oxidoreductase 75 kDa subunit, mitochondrial	no	0.161603	0.826521	0.48434	0.409662	1.4803	1.0211	0.4108	0.7251	1.16045	0.181948	-0.147861	0.171265	0	NADH-ubiquinone oxidoreductase 75 kDa subunit, mitochondrial	0.470531	0.909326	0.137253	0.227482	0.160375	0	0	-0.438794	0	1		P07356	Annexin A2;Annexin	0.304511	0.998673	1.03344	0.717904	1.63436	1.16127	0.574441	1.12857	1.20958	0.214	-0.433799	0.336169
Q8K2B3	Succinate dehydrogenase [ubiquinone] flavoprotein subunit, mitochondrial	no	-0.230396	0.361571	-0.824643	-0.0375991	0.131283	0.494748	0.247677	0.210297	0.34857	0.258844	0.96914	0.281246	0	Succinate dehydrogenase [ubiquinone] flavoprotein subunit, mitochondrial	-0.182767	0.271001	0.246923	0.0784286	0.162679	0	0	-0.453768	0	1		P40336	Vacuolar protein sorting-associated protein 26A	-0.0874881	0.533723	-0.275542	0.270643	0.285343	0.634912	0.411318	0.613763	0.397693	0.290896	0.683202	0.44615
Q8C0M9	L-asparaginase	no	-0.53785	-0.828603	-1.00564	-1.42481	0.144599	-0.754356	0.38035	-1.01388	0.681103	-0.125531	1.24118	0.35101	0	L-asparaginase	-0.949226	-0.310823	0.185549	0.338642	0.163534	1	1	-0.638403	0	1		Q9DCL9	Multifunctional protein ADE2;Phosphoribosylaminoimidazole-succinocarboxamide synthase;Phosphoribosylaminoimidazole carboxylase	-0.394942	-0.656451	-0.456544	-1.11656	0.298658	-0.614192	0.543991	-0.610417	0.730227	-0.0934788	0.955238	0.515914
F8WGC2	Annexin;Annexin A7	no	0.122289	0.203176	1.04076	0.293977	0.0562046	-0.102839	-0.0495405	0.227553	-0.0456652	-0.395509	-1.00177	-0.113741	0	Annexin;Annexin A7	0.41505	0.0328445	0.211496	0.0728323	0.168432	0	0	0.382205	1	0		F7ABS0	SH3 domain-binding glutamic acid-rich protein	0.265197	0.375328	1.58986	0.602219	0.210264	0.0373251	0.1141	0.631019	0.00345838	-0.363457	-1.28771	0.0511633
P47199	Quinone oxidoreductase	no	0.162304	0.886652	-0.394907	0.189407	-0.332888	0.251007	-0.517976	-0.58476	-0.523736	-0.517612	-0.33484	-0.434121	0	Quinone oxidoreductase	0.210864	-0.296154	0.262435	0.190007	0.173413	0	0	0.507018	1	0		Q9D8N0	Elongation factor 1-gamma	0.305212	1.0588	0.154194	0.497649	-0.178829	0.391172	-0.354335	-0.181293	-0.474613	-0.48556	-0.620778	-0.269217
E9Q7Q3	0	no	0.929952		2.31565	0.569655	-0.287713		0.379459	0.543728	-1.19176		-1.9718	-0.00243637	0	0	1.27175	0.211825	0.532211	0.254231	0.17441	1	1	1.05993	1	0		Q7TMK9	Heterogeneous nuclear ribonucleoprotein Q	1.07286		2.86475	0.877897	-0.133654		0.5431	0.947195	-1.14264		-2.25773	0.162468
P50543	Protein S100-A11	no	1.15234	1.35551	2.41078	0.727219	-0.00936063	-0.235076	1.42507	1.11263	-0.19162	-0.35416	-0.282172	0.392089	0	Protein S100-A11	1.41146	0.573316	0.357899	0.409202	0.174939	1	1	0.838147	1	0		Q3TYK4	cAMP-dependent protein kinase type I-alpha regulatory subunit	1.29525	1.52766	2.95988	1.03546	0.144699	-0.0949116	1.58871	1.5161	-0.142497	-0.322108	-0.56811	0.556993
P06728	Apolipoprotein A-IV	no	0.21886	-0.0591626	1.03557	0.331989	-0.498818	-0.0329518	-0.0547485	0.322719	-0.57726	0.122142	-1.68787	0.290745	0	Apolipoprotein A-IV	0.381815	-0.0659497	0.232898	0.168239	0.174954	0	0	0.447765	1	0		Q9CQX8	28S ribosomal protein S36, mitochondrial	0.361768	0.11299	1.58467	0.640231	-0.344758	0.107213	0.108892	0.726186	-0.528136	0.154194	-1.97381	0.455649
P27546	Microtubule-associated protein 4;Microtubule-associated protein	no	-0.492805	-1.47438	0.00642046	-1.19912	0.283914	-0.531272	-0.0378576	-0.423382	0.925773	0.895996	0.0676753	0.761171	0	Microtubule-associated protein 4;Microtubule-associated protein	-0.789971	-0.177149	0.336448	0.18664	0.17596	1	1	-0.612822	0	1		O70475	UDP-glucose 6-dehydrogenase	-0.349897	-1.30223	0.555522	-0.890875	0.437973	-0.391108	0.125783	-0.0199154	0.974896	0.928048	-0.218263	0.926075
P01869	Ig gamma-1 chain C region, membrane-bound form;Ig gamma-1 chain C region secreted form	no	0.962569	2.13321	-0.354132	-0.492459	-0.931601	0.803086	-0.734084	-2.50639	-1.91388	-1.37736	-0.444119	-1.85396	0	Ig gamma-1 chain C region, membrane-bound form;Ig gamma-1 chain C region secreted form	0.562297	-0.842248	0.617814	0.676768	0.17663	1	1	1.40454	1	0		Q9CPP6	NADH dehydrogenase [ubiquinone] 1 alpha subcomplex subunit 5	1.10548	2.30536	0.19497	-0.184217	-0.777542	0.94325	-0.570443	-2.10293	-1.86475	-1.34531	-0.730057	-1.68905
Q80YD1	ATP-dependent RNA helicase SUPV3L1, mitochondrial	no	0.265586	1.05385		0.18668	-0.499789	0.20333		0.0688629	-0.729598	-0.716208		0.0754711	0	ATP-dependent RNA helicase SUPV3L1, mitochondrial	0.502039	-0.0758654	0.276845	0.215487	0.17912	1	1	0.577905	1	0		P38060	Hydroxymethylglutaryl-CoA lyase, mitochondrial	0.408494	1.226		0.494922	-0.34573	0.343494		0.472329	-0.680474	-0.684156		0.240375
E9PZ16	Basement membrane-specific heparan sulfate proteoglycan core protein;Endorepellin;LG3 peptide	no		0.0520135	-0.0932414	0.334014		0.537354	0.330006	1.46734		0.794873	0.588813	0.962201	0	Basement membrane-specific heparan sulfate proteoglycan core protein;Endorepellin;LG3 peptide	0.0975955	0.778234	0.125426	0.349715	0.182175	1	1	-0.680639	0	1	Q8BH59	A2A5Y6	Microtubule-associated protein;Microtubule-associated protein tau		0.224166	0.45586	0.642257		0.677518	0.493647	1.87081		0.826925	0.302875	1.12711
Q99MN9	Propionyl-CoA carboxylase beta chain, mitochondrial	no	0.198167	0.441059	-1.09135	-1.01709	1.64096	0.519216	-0.224866	0.0419548	1.3362	0.103877	0.924151	1.22135	0	Propionyl-CoA carboxylase beta chain, mitochondrial	-0.367304	0.494316	0.399966	0.412034	0.184206	1	1	-0.86162	0	1		P29699	Alpha-2-HS-glycoprotein	0.341075	0.613211	-0.542248	-0.708849	1.79502	0.659381	-0.0612249	0.445421	1.38532	0.135929	0.638213	1.38626
P61971	Nuclear transport factor 2	no	0.0352008	0.457572	-0.0359137	-0.168975	-0.305294	0.146122	-0.232941	-0.408219	-0.339903	-0.233761	-0.0935695	-0.0809761	0	Nuclear transport factor 2	0.0719711	-0.200083	0.135319	0.120874	0.185048	0	0	0.272054	1	0		P40142	Transketolase	0.178109	0.629724	0.513188	0.139267	-0.151234	0.286287	-0.0693005	-0.00475299	-0.29078	-0.201709	-0.379507	0.0839282
P12815	Programmed cell death protein 6	no	0.203396	0.432961	0.68681	-0.0813945	0.030665	0.36369	-0.178884	-0.268847	-0.114418	-0.140555	-1.01917	-0.156704	0	Programmed cell death protein 6	0.310443	-0.0133438	0.163722	0.140468	0.185166	0	0	0.323787	1	0	E9Q9F5	Q64726	Zinc-alpha-2-glycoprotein	0.346305	0.605113	1.23591	0.226848	0.184725	0.503855	-0.015243	0.13462	-0.0652948	-0.108503	-1.30511	0.0082
Q9WUR9	Adenylate kinase isoenzyme 4, mitochondrial	no	0.38296	0.859765	-0.478575		-0.383933	-0.188122	-1.85544		-0.804967	-1.03734	-1.58456		0	Adenylate kinase isoenzyme 4, mitochondrial	0.254717	-0.809166	0.39163	0.526184	0.185952	1	1	1.06388	1	0		P63085	Mitogen-activated protein kinase 1	0.525868	1.03192	0.0705267		-0.229873	-0.0479571	-1.6918		-0.755844	-1.00529	-1.87049
Q6P069	Sorcin	no	0.746176	0.578148	1.17021	0.552262	0.381496	0.538369	0.238535	0.785787	-0.227528	0.0533727	-0.844112	0.0628368	0	Sorcin	0.7617	0.486047	0.142794	0.11718	0.188072	0	0	0.275653	1	0		P12382	6-phosphofructokinase, liver type	0.889084	0.7503	1.71931	0.860504	0.535555	0.678534	0.402176	1.18925	-0.178404	0.0854246	-1.13005	0.227741
Q61207	Sulfated glycoprotein 1	no	0.401379	-0.667028	0.224051	-0.122292	-0.0876605	-1.00569	-0.27916	-0.633054	-0.760659	-0.322285	-0.730516	-0.143567	0	Sulfated glycoprotein 1	-0.0409725	-0.501391	0.235314	0.202528	0.189672	0	0	0.460418	1	0	Q8VBT1	B1AQZ0	Septin-8	0.544288	-0.494876	0.773152	0.18595	0.0663992	-0.865523	-0.115519	-0.229588	-0.711535	-0.290233	-1.01645	0.0213375
Q9CQW1	Synaptobrevin homolog YKT6	no	0.528838	0.940416	0.8049	1.02422	0.25215	0.342006	-0.93659	0.968703	-0.374139	-0.470046	-1.92122	0.123395	0	Synaptobrevin homolog YKT6	0.824593	0.156567	0.108445	0.39771	0.191782	1	1	0.668026	1	0		E9QPD4	Oxysterol-binding protein;Oxysterol-binding protein 1	0.671746	1.11257	1.354	1.33246	0.40621	0.48217	-0.772949	1.37217	-0.325015	-0.437995	-2.20716	0.288299
Q9WVQ5	Probable methylthioribulose-1-phosphate dehydratase	no	-0.225454	-0.38042	-0.749981	-0.747493	0.260617	-0.168168	-0.0717043	-0.696248	0.555992	0.172214	0.874838	0.0732711	0	Probable methylthioribulose-1-phosphate dehydratase	-0.525837	-0.168876	0.132523	0.198332	0.192224	0	0	-0.356961	0	1		Q9DCT2	NADH dehydrogenase [ubiquinone] iron-sulfur protein 3, mitochondrial	-0.0825453	-0.208268	-0.20088	-0.439251	0.414677	-0.0280033	0.0919367	-0.292782	0.605115	0.204266	0.5889	0.238175
Q8VEE1	LIM and cysteine-rich domains protein 1	no		1.2991	0.791803	0.170868		1.51901	1.18249	1.40391		0.0131115	0.253136	1.18752	0	LIM and cysteine-rich domains protein 1	0.753923	1.36847	0.326242	0.0987474	0.193374	1	1	-0.614549	0	1		P53994	Ras-related protein Rab-2A;Ras-related protein Rab-2B		1.47125	1.3409	0.47911		1.65918	1.34613	1.80738		0.0451634	-0.0328019	1.35242
P13707	Glycerol-3-phosphate dehydrogenase [NAD(+)], cytoplasmic	no	0.386063	0.821514	0.904917	-0.741629	0.120947	-0.105191	-0.410721	-0.871267	-0.235057	-0.688246	-1.27164	-0.260401	0	Glycerol-3-phosphate dehydrogenase [NAD(+)], cytoplasmic	0.342716	-0.316558	0.378924	0.214604	0.193541	1	1	0.659274	1	0		O88543	COP9 signalosome complex subunit 3	0.528971	0.993666	1.45402	-0.433387	0.275007	0.034973	-0.24708	-0.467801	-0.185934	-0.656194	-1.55758	-0.0954967
P08752	Guanine nucleotide-binding protein G(i) subunit alpha-2;Guanine nucleotide-binding protein G(i) subunit alpha-1;Guanine nucleotide-binding protein G(k) subunit alpha;Guanine nucleotide-binding protein G(o) subunit alpha	no	0.406514	0.751699	1.39598	0.684419	0.0977504	0.612418	0.15482	0.796088	-0.297814	-0.0111408	-1.23665	0.0472293	0	Guanine nucleotide-binding protein G(i) subunit alpha-2;Guanine nucleotide-binding protein G(i) subunit alpha-1;Guanine nucleotide-binding protein G(k) subunit alpha;Guanine nucleotide-binding protein G(o) subunit alpha	0.809654	0.415269	0.209234	0.171402	0.196943	0	0	0.394384	1	0		P18572	Basigin	0.549423	0.923851	1.94508	0.992661	0.25181	0.752583	0.318461	1.19955	-0.248691	0.0209111	-1.52259	0.212134
Q8BP40	Lysophosphatidic acid phosphatase type 6	no	-0.409641	0.0306689	-0.66728	-0.220831	-0.619819	-0.373562	-0.452639	-0.965648	-0.151666	-0.223527	0.236421	-0.752827	0	Lysophosphatidic acid phosphatase type 6	-0.316771	-0.602917	0.147592	0.131354	0.198352	0	0	0.286146	1	0		Q9DCT8	Cysteine-rich protein 2	-0.266732	0.202821	-0.118179	0.0874115	-0.465759	-0.233397	-0.288998	-0.562181	-0.102543	-0.191475	-0.0495166	-0.587923
P11404	Fatty acid-binding protein, heart	no	-0.841812	-1.58802	-0.758046	-1.34808	-1.06467	-1.90977	-1.28591	-2.24741	-0.200005	-0.249107	-0.601188	-0.857732	0	Fatty acid-binding protein, heart	-1.13399	-1.62694	0.199725	0.273469	0.200157	0	0	0.49295	1	0		P61148	Fibroblast growth factor 1	-0.698904	-1.41587	-0.208945	-1.03984	-0.91061	-1.7696	-1.12227	-1.84394	-0.150882	-0.217055	-0.887126	-0.692828
Q60597	2-oxoglutarate dehydrogenase, mitochondrial	no	-0.282605	0.647776	-0.680731	0.245925	0.505774	0.84103	0.0686515	0.493755	0.818931	0.18964	0.716759	0.205595	0	2-oxoglutarate dehydrogenase, mitochondrial	-0.0174084	0.477303	0.291853	0.158213	0.200993	0	0	-0.494711	0	1		E9Q3A4	Proteasome subunit alpha type;Proteasome subunit alpha type-2	-0.139697	0.819928	-0.131629	0.554167	0.659833	0.981195	0.232292	0.897221	0.868054	0.221692	0.430821	0.370499
Q64727	Vinculin	no	0.230601	-0.445489	0.451836	-0.243113	-0.235734	-0.535556	-0.129566	-0.48576	-0.255136	0.0509232	-0.607285	-0.158714	0	Vinculin	-0.00154146	-0.346654	0.207141	0.0976665	0.201858	0	0	0.345113	1	0		O55042	Alpha-synuclein;Beta-synuclein	0.373509	-0.273337	1.00094	0.0651287	-0.0816748	-0.395392	0.0340749	-0.0822938	-0.206013	0.0829751	-0.893223	0.00619029
Q91W90	Thioredoxin domain-containing protein 5	no	0.91201	-0.0928112	1.04745	0.188776	1.13259	0.735243	0.999471	0.99288	0.446879	0.174341	0.101874	0.895282	0	Thioredoxin domain-containing protein 5	0.513857	0.965045	0.276432	0.0830857	0.202179	0	0	-0.451188	0	1		Q9JK42	[Pyruvate dehydrogenase [lipoamide]] kinase isozyme 2, mitochondrial	1.05492	0.0793409	1.59655	0.497018	1.28665	0.875407	1.16311	1.39635	0.496002	0.206393	-0.184064	1.06019
O08804	0	no	0.0895069	0.174091	-0.307383	-0.0601685	0.238258	0.353315	-0.0763139	0.179392	0.151632	0.187163	0.175832	0.264417	0	0	-0.0259884	0.173663	0.105563	0.0908151	0.202698	0	0	-0.199651	0	1		O55137	Acyl-coenzyme A thioesterase 1	0.232415	0.346243	0.241718	0.248074	0.392317	0.493479	0.087327	0.582858	0.200755	0.219215	-0.110106	0.429321
P53395	Lipoamide acyltransferase component of branched-chain alpha-keto acid dehydrogenase complex, mitochondrial	no	0.0562143	1.01021	-1.34674	-0.626241	1.18491	0.316122	0.229665	0.678972	1.18169	-0.597234	1.54813	1.19214	0	Lipoamide acyltransferase component of branched-chain alpha-keto acid dehydrogenase complex, mitochondrial	-0.22664	0.602416	0.502005	0.217191	0.20272	1	1	-0.829056	0	1		P42208	Septin-2	0.199123	1.18236	-0.797639	-0.317999	1.33897	0.456286	0.393306	1.08244	1.23082	-0.565182	1.26219	1.35705
Q8VCT4	Carboxylesterase 1D	no	-0.887081	0.337627	-0.819918	-0.571517	-1.16803	-0.55668	-0.690529	-1.79276	-0.399094	-1.02185	0.0961918	-1.24402	0	Carboxylesterase 1D	-0.485222	-1.052	0.282554	0.279611	0.20382	0	0	0.566778	1	0		P80313	T-complex protein 1 subunit eta	-0.744173	0.509779	-0.270817	-0.263275	-1.01398	-0.416515	-0.526888	-1.38929	-0.349971	-0.989793	-0.189746	-1.07911
Q9DCX2	ATP synthase subunit d, mitochondrial	no	0.0119341	0.445834	0.223714	0.115865	2.09223	0.18684	0.519472	0.71357	1.91054	-0.0977845	0.505029	0.534914	0	ATP synthase subunit d, mitochondrial	0.199337	0.878027	0.092845	0.419089	0.203921	1	1	-0.67869	0	1		Q91YY4	ATP synthase mitochondrial F1 complex assembly factor 2	0.154842	0.617986	0.772815	0.424107	2.24629	0.327004	0.683113	1.11704	1.95966	-0.0657326	0.219091	0.699818
O08528	Hexokinase-2	no	-0.593012	0.108761	-0.362854	-0.532035	0.0532086	0.506941	-0.283339	-0.277059	0.653711	0.3797	0.112537	0.250097	0	Hexokinase-2	-0.344785	-6.20774e-05	0.158826	0.186383	0.210039	0	0	-0.344723	0	1		P20108	Thioredoxin-dependent peroxide reductase, mitochondrial	-0.450104	0.280913	0.186247	-0.223793	0.207268	0.647106	-0.119698	0.126407	0.702835	0.411752	-0.173401	0.415001
P59017	Bcl-2-like protein 13	no	0.467508	-0.814345	0.770112	-0.930235	-0.139419	-1.2078	-1.24791	-0.814024	-0.487274	-0.227139	-1.6417	0.0438626	0	Bcl-2-like protein 13	-0.12674	-0.85229	0.435496	0.256995	0.212381	1	1	0.72555	1	0		P09411	Phosphoglycerate kinase 1	0.610417	-0.642193	1.31921	-0.621993	0.014641	-1.06764	-1.08427	-0.410558	-0.438151	-0.195087	-1.92763	0.208767
Q9CRB6	Tubulin polymerization-promoting protein family member 3	no	0.414379	-0.195904	0.381295	-0.405313	-0.161407	-0.813992	0.166803	-0.746931	-0.453696	-0.137323	0.0911643	-0.0385921	0	Tubulin polymerization-promoting protein family member 3	0.0486143	-0.388882	0.206216	0.236193	0.213239	0	0	0.437496	1	0		Q9Z0S1	3(2),5-bisphosphate nucleotidase 1	0.557288	-0.0237521	0.930397	-0.0970714	-0.00734755	-0.673828	0.330444	-0.343465	-0.404573	-0.105272	-0.194774	0.126312
Q91VR2	ATP synthase subunit gamma, mitochondrial;ATP synthase gamma chain	no	0.17289	0.281168	-0.563441	0.307531	-0.473321	0.00180688	-1.41645	-0.0940352	-0.675236	-0.33629	-0.820715	-0.442753	0	ATP synthase subunit gamma, mitochondrial;ATP synthase gamma chain	0.0495372	-0.4955	0.206392	0.323668	0.213857	0	0	0.545037	1	0		Q9Z2U0	Proteasome subunit alpha type-7;Proteasome subunit alpha type-7-like	0.315798	0.45332	-0.0143393	0.615773	-0.319262	0.141971	-1.25281	0.309431	-0.626112	-0.304238	-1.10665	-0.277849
F8VPN4	0	no	-0.301289	0.416422	-0.572532	0.469992	0.0636674	0.655645	0.28906	0.737169	0.395438	0.166442	0.818405	0.303731	0	0	0.00314804	0.436385	0.260261	0.157895	0.21459	0	0	-0.433237	0	1		P14824	Annexin A6	-0.158381	0.588574	-0.0234311	0.778234	0.217727	0.795809	0.452701	1.14064	0.444561	0.198494	0.532467	0.468635
P49817	Caveolin-1;Caveolin	no	0.265695	0.888968	1.76278	1.61129	0.244181	0.490297	0.144603	1.26311	0.0848345	-0.239563	-1.7497	-0.239057	0	Caveolin-1;Caveolin	1.13218	0.535548	0.346067	0.253168	0.217788	1	1	0.596636	1	0		Q8VCT4	Carboxylesterase 1D	0.408603	1.06112	2.31188	1.91953	0.398241	0.630461	0.308244	1.66658	0.133958	-0.207511	-2.03564	-0.0741525
Q9CPV4	Glyoxalase domain-containing protein 4	no	-0.348205	-0.377294	-0.309092	-0.284254	-0.193414	-0.159795	-0.249704	-0.392169	0.0875928	0.075502	0.19095	-0.0961647	0	Glyoxalase domain-containing protein 4	-0.329711	-0.248771	0.0206109	0.0512713	0.217808	0	0	-0.0809407	0	1		P47934	Carnitine O-acetyltransferase	-0.205297	-0.205142	0.240009	0.0239883	-0.0393549	-0.0196308	-0.0860632	0.0112971	0.136716	0.107554	-0.094988	0.0687396
P56480	ATP synthase subunit beta, mitochondrial	no	-0.0158033	-0.929517	-0.88031	-0.964967	-1.45807	-1.17937	-0.489687	-1.42459	-1.42391	-0.185097	0.378416	-0.459979	0	ATP synthase subunit beta, mitochondrial	-0.697649	-1.13793	0.227944	0.224833	0.218233	0	0	0.44028	1	0		P61089	Ubiquitin-conjugating enzyme E2 N	0.127105	-0.757365	-0.331209	-0.656725	-1.30401	-1.03921	-0.326046	-1.02112	-1.37479	-0.153045	0.0924781	-0.295075
P49813	Tropomodulin-1	no	-0.56934	-1.62185	-0.708739		-1.81196	-1.24618	-1.56795		-0.992096	0.405815	-0.854601		0	Tropomodulin-1	-0.966641	-1.54203	0.330064	0.163841	0.218492	1	1	0.575386	1	0		F8WGL3	Cofilin-1	-0.426432	-1.44969	-0.159637		-1.6579	-1.10601	-1.4043		-0.942973	0.437867	-1.14054
Q9WUL7	ADP-ribosylation factor-like protein 3	no	-0.285437	0.164348	-0.228212	-0.119779	0.0712154	-0.0816013	0.206635	-0.00605611	0.347474	-0.169224	0.207039	-0.0882084	0	ADP-ribosylation factor-like protein 3	-0.11727	0.0475482	0.0999598	0.0615235	0.219365	0	0	-0.164818	0	1		Q62000	Mimecan	-0.142529	0.3365	0.320889	0.188463	0.225275	0.0585631	0.370276	0.39741	0.396598	-0.137172	-0.0788988	0.0766959
P20152	Vimentin	no	1.54742	0.401637	3.85532	0.690777	0.133176	0.388908	-0.286101	1.32769	-1.97062	-1.41212	-4.26021	0.832352	0	Vimentin	1.62379	0.390919	0.782611	0.34185	0.220588	1	1	1.23287	1	0		Q08879	Fibulin-1	1.69033	0.573789	4.40443	0.999019	0.287236	0.529073	-0.12246	1.73116	-1.9215	-1.38007	-4.54614	0.997256
P50462	Cysteine and glycine-rich protein 3	no	0.343961	-0.271515	-1.20527	-0.437459	0.423865	-0.404521	0.297573	0.180602	0.199411	0.0562253	1.66816	0.801969	0	Cysteine and glycine-rich protein 3	-0.392572	0.12438	0.318804	0.183163	0.221207	0	0	-0.516951	0	1		P63280	SUMO-conjugating enzyme UBC9	0.486869	-0.0993626	-0.656172	-0.129217	0.577924	-0.264356	0.461214	0.584068	0.248535	0.0882773	1.38223	0.966873
O70492	Sorting nexin-3	no	0.439455	-0.376543	0.719753	-0.0322811	-0.00480033	-0.478047	-0.5442	0.134272	-0.544127	-0.190175	-1.21636	0.183895	0	Sorting nexin-3	0.187596	-0.223194	0.243793	0.169182	0.221271	0	0	0.41079	1	0		P19157	Glutathione S-transferase P 1;Glutathione S-transferase P 2	0.582363	-0.204391	1.26885	0.275961	0.149259	-0.337882	-0.380559	0.537738	-0.495003	-0.158124	-1.5023	0.348799
P51125	Calpastatin	no	-0.271648	-1.44226	-0.420412	-0.980803	0.199151	-0.834911	0.0769787	-0.570953	0.298088	0.380025	0.192628	0.415724	0	Calpastatin	-0.778781	-0.282434	0.268737	0.249929	0.225214	0	0	-0.496348	0	1		P60766	Cell division control protein 42 homolog	-0.12874	-1.27011	0.128689	-0.672561	0.35321	-0.694747	0.24062	-0.167486	0.347212	0.412077	-0.0933095	0.580628
O54988	STE20-like serine/threonine-protein kinase	no	-0.299101	-0.457258		-1.2353	0.131283	0.631159		-0.675489	0.548193	0.321949		0.765265	0	STE20-like serine/threonine-protein kinase	-0.663888	0.0289842	0.289333	0.380649	0.22577	1	1	-0.692872	0	1		P57780	Alpha-actinin-4	-0.156193	-0.285106		-0.927062	0.285343	0.771323		-0.272023	0.597317	0.354001		0.93017
A3KGQ6	Actin-related protein 2/3 complex subunit 5;Actin-related protein 2/3 complex subunit 5-like protein	no	-0.658079	-0.778594		-0.33879	-0.248062	-0.589277		-0.102911	0.454429	0.368158		0.279233	0	Actin-related protein 2/3 complex subunit 5;Actin-related protein 2/3 complex subunit 5-like protein	-0.591821	-0.313417	0.131212	0.144154	0.227011	0	0	-0.278405	0	1		Q62425	NADH dehydrogenase [ubiquinone] 1 alpha subcomplex subunit 4	-0.515171	-0.606442		-0.0305479	-0.0940022	-0.449112		0.300555	0.503552	0.40021		0.444137
P97355	Spermine synthase	no		-0.510947	-1.0827	-0.226125		-0.514453	0.0493642	-0.013845		0.420122	0.893801	0.0634526	0	Spermine synthase	-0.60659	-0.159645	0.251853	0.17834	0.2286	0	0	-0.446946	0	1		Q9D1H9	Microfibril-associated glycoprotein 4		-0.338795	-0.533597	0.0821176		-0.374288	0.213005	0.389621		0.452174	0.607863	0.228357
Q9DCD0	6-phosphogluconate dehydrogenase, decarboxylating	no	0.410354	0.949209	0.742385	0.526869	0.306001	0.737176	0.138649	0.508989	-0.136152	-0.148994	-0.48938	-0.130688	0	6-phosphogluconate dehydrogenase, decarboxylating	0.657204	0.422704	0.119179	0.129307	0.231062	0	0	0.2345	1	0		Q07417	Short-chain specific acyl-CoA dehydrogenase, mitochondrial	0.553262	1.12136	1.29149	0.835111	0.460061	0.877341	0.30229	0.912456	-0.0870283	-0.116942	-0.775318	0.0342158
F8WIY0	Isocitrate dehydrogenase [NADP];Isocitrate dehydrogenase [NADP] cytoplasmic	no	0.148931	0.89177	0.0968771	0.392396	0.0852162	0.44583	-0.0287628	-0.188674	-0.157596	-0.282801	-0.187352	-0.500003	0	Isocitrate dehydrogenase [NADP];Isocitrate dehydrogenase [NADP] cytoplasmic	0.382494	0.0784024	0.181565	0.134742	0.231123	0	0	0.304091	1	0		Q3TML0	Protein disulfide-isomerase A6	0.291839	1.06392	0.645978	0.700638	0.239276	0.585994	0.134878	0.214793	-0.108472	-0.250749	-0.47329	-0.335099
Q64669	NAD(P)H dehydrogenase [quinone] 1	no	0.27717	1.01957	-0.312884	0.16623	-0.232532	0.432015	-0.732178	-0.26593	-0.521232	-0.484326	-0.543522	-0.563246	0	NAD(P)H dehydrogenase [quinone] 1	0.287521	-0.199656	0.27556	0.239454	0.231347	0	0	0.487178	1	0		F6VW30	14-3-3 protein theta	0.420078	1.19172	0.236217	0.474472	-0.0784723	0.572179	-0.568538	0.137537	-0.472109	-0.452274	-0.82946	-0.398342
Q9CQ54	NADH dehydrogenase [ubiquinone] 1 subunit C2	no	0.325414	0.73418		0.968173	1.79592	0.673538		1.21363	1.43295	-0.0568033		0.171151	0	NADH dehydrogenase [ubiquinone] 1 subunit C2	0.675922	1.2277	0.187821	0.324081	0.231459	0	0	-0.551776	0	1		Q8BKC5	Importin-5	0.468323	0.906332		1.27642	1.94998	0.813702		1.6171	1.48207	-0.0247513		0.336055
P10493	Nidogen-1	no	-0.874402	-0.933352	-0.615196	-0.596423	-0.965178	-0.367906	0.11589	-0.460327	-0.305703	0.495919	0.675725	0.0832662	0	Nidogen-1	-0.754843	-0.41938	0.0869664	0.221498	0.233087	0	0	-0.335463	0	1		F8VQ43	Laminin subunit alpha-2	-0.731494	-0.7612	-0.0660951	-0.288181	-0.811118	-0.227741	0.279531	-0.0568609	-0.25658	0.527971	0.389787	0.24817
P15105	Glutamine synthetase	no	0.532727	1.13624	2.1144	0.84514	0.293149	0.601136	0.0560697	1.35345	-0.316516	-0.398835	-2.20233	0.557999	0	Glutamine synthetase	1.15713	0.575951	0.342056	0.282163	0.239545	1	1	0.581177	1	0		Q9DCM2	Glutathione S-transferase kappa 1	0.675635	1.30839	2.6635	1.15338	0.447209	0.7413	0.219711	1.75692	-0.267392	-0.366783	-2.48827	0.722903
Q3U367	4-trimethylaminobutyraldehyde dehydrogenase	no	0.116997	0.642108	0.070077	0.227863	-0.250096	0.575487	-0.339223	-0.279655	-0.268528	-0.273578	-0.558391	-0.31027	0	4-trimethylaminobutyraldehyde dehydrogenase	0.264261	-0.0733717	0.13022	0.217079	0.240781	0	0	0.337633	1	0		Q60759	Glutaryl-CoA dehydrogenase, mitochondrial	0.259905	0.81426	0.619178	0.536106	-0.0960363	0.715652	-0.175582	0.123811	-0.219404	-0.241526	-0.844329	-0.145366
P58389	Serine/threonine-protein phosphatase 2A activator	no		0.307743	0.282938	0.125225		0.295721	-0.182271	-0.130995		0.0511954	-0.48091	-0.160583	0	Serine/threonine-protein phosphatase 2A activator	0.238635	-0.00584808	0.0571554	0.151509	0.243235	0	0	0.244483	1	0		Q08857	Platelet glycoprotein 4		0.479895	0.832039	0.433467		0.435885	-0.0186296	0.272472		0.0832474	-0.766848	0.00432164
P24369	Peptidyl-prolyl cis-trans isomerase B	no	-0.162561	-0.997775	0.0437266	-0.12858	-0.427996	-0.0107461	0.162206	0.928669	-0.226222	1.03055	0.497075	1.09156	0	Peptidyl-prolyl cis-trans isomerase B	-0.311298	0.163033	0.233238	0.283683	0.245719	0	0	-0.474331	0	1		Q06770	Corticosteroid-binding globulin	-0.0196529	-0.825623	0.592828	0.179662	-0.273936	0.129418	0.325847	1.33214	-0.177099	1.06261	0.211137	1.25647
O35855	Branched-chain-amino-acid aminotransferase, mitochondrial;Branched-chain-amino-acid aminotransferase	no	0.173122	0.917484	-0.263285	0.0298259	-0.195195	0.113179	-0.16799	-0.36199	-0.396761	-0.719991	0.0761094	-0.323978	0	Branched-chain-amino-acid aminotransferase, mitochondrial;Branched-chain-amino-acid aminotransferase	0.214287	-0.152999	0.251376	0.0985448	0.247032	0	0	0.367286	1	0		Q6PB66	Leucine-rich PPR motif-containing protein, mitochondrial	0.31603	1.08964	0.285816	0.338068	-0.0411351	0.253343	-0.00434903	0.0414765	-0.347637	-0.687939	-0.209829	-0.159074
Q9D8S4	Oligoribonuclease, mitochondrial	no	0.371391	-0.158192		-0.660323	-0.48418	-0.543105		-0.837814	-0.696139	-0.485353		-0.0860212	0	Oligoribonuclease, mitochondrial	-0.149041	-0.6217	0.297865	0.109388	0.249116	0	0	0.472659	1	0		Q9CPQ1	Cytochrome c oxidase subunit 6C	0.514299	0.0139605		-0.352081	-0.330121	-0.40294		-0.434348	-0.647016	-0.453301		0.0788831
Q8VDM4	26S proteasome non-ATPase regulatory subunit 2	no	-0.300275	0.364937	0.667323	0.606387	0.501933	0.566795	0.884735	0.666107	0.814181	0.338782	0.294281	-0.390183	0	26S proteasome non-ATPase regulatory subunit 2	0.334593	0.654892	0.221465	0.0837213	0.250266	0	0	-0.320299	0	1		Q9WV98	Mitochondrial import inner membrane translocase subunit Tim9	-0.157367	0.537089	1.21642	0.91463	0.655993	0.706959	1.04838	1.06957	0.863304	0.370834	0.00834347	-0.225278
P62075	Mitochondrial import inner membrane translocase subunit Tim13	no	-0.305756	-1.04628	-0.445973	-0.61252	-0.212908	-0.854652	0.490336	-0.176095	0.0150695	0.165184	1.00394	0.20905	0	Mitochondrial import inner membrane translocase subunit Tim13	-0.602632	-0.18833	0.160623	0.27467	0.251444	0	0	-0.414303	0	1		Q9Z1N5	Spliceosome RNA helicase Ddx39b;ATP-dependent RNA helicase DDX39A	-0.162848	-0.874128	0.103128	-0.304277	-0.0588486	-0.714487	0.653977	0.227371	0.0641931	0.197236	0.718	0.373954
Q9CVB6	Actin-related protein 2/3 complex subunit 2	no	-0.0413926	0.68469	0.877003	0.268384	0.19689	1.08587	0.993209	0.989239	0.169968	0.334648	0.11296	0.579257	0	Actin-related protein 2/3 complex subunit 2	0.447171	0.816303	0.206525	0.207674	0.254347	0	0	-0.369132	0	1		E9Q8I0	Complement factor H	0.101516	0.856842	1.4261	0.576626	0.35095	1.22604	1.15685	1.39271	0.219091	0.3667	-0.172978	0.744161
Q8BGQ7	Alanine--tRNA ligase, cytoplasmic	no	-0.344468	0.833543	0.231881	0.463573	0.424348	0.996913	0.562667	0.639704	0.768582	-0.0206994	0.229792	0.280081	0	Alanine--tRNA ligase, cytoplasmic	0.296132	0.655908	0.246871	0.122086	0.255758	0	0	-0.359776	0	1		Q99P30	Peroxisomal coenzyme A diphosphatase NUDT7	-0.20156	1.0057	0.780982	0.771815	0.578407	1.13708	0.726308	1.04317	0.817705	0.0113525	-0.0561461	0.444985
Q3UZG4	Aminoacyl tRNA synthase complex-interacting multifunctional protein 1;Endothelial monocyte-activating polypeptide 2	no	-0.462908	-1.36195	-0.474459	-0.92789	0.00969677	-1.23014	0.748012	-0.345294	0.428243	0.345905	1.1475	0.703308	0	Aminoacyl tRNA synthase complex-interacting multifunctional protein 1;Endothelial monocyte-activating polypeptide 2	-0.8068	-0.204431	0.214391	0.410783	0.255921	1	1	-0.60237	0	1	Q9JM14	P53996	Cellular nucleic acid-binding protein	-0.32	-1.18979	0.0746424	-0.619648	0.163756	-1.08997	0.911653	0.0581726	0.477367	0.377957	0.861558	0.868213
A2BIN1	Major urinary protein 6;Major urinary protein 2;Major urinary protein 1;Major urinary proteins 11 and 8	no	-2.46751	-2.94442	-2.38596	1.50759	-1.17016	-0.526203	-0.208462	1.83951	1.27494	2.58018	2.17413	0.190112	0	Major urinary protein 6;Major urinary protein 2;Major urinary protein 1;Major urinary proteins 11 and 8	-1.57257	-0.0163294	1.03408	0.650151	0.258111	1	1	-1.55624	0	1		Q8JZN5	Acyl-CoA dehydrogenase family member 9, mitochondrial	-2.3246	-2.77227	-1.83686	1.81583	-1.0161	-0.386038	-0.0448211	2.24298	1.32406	2.61224	1.88819	0.355016
Q9R111	Guanine deaminase	no	0.533088	0.736074	1.1885	0.476365	0.372911	0.562609	0.615324	0.473265	-0.214558	0.0114325	-1.11718	-0.11625	0	Guanine deaminase	0.733506	0.506027	0.161584	0.0531827	0.258535	0	0	0.227479	1	0	E9Q8T1	P35700	Peroxiredoxin-1	0.675997	0.908226	1.7376	0.784607	0.52697	0.702773	0.778965	0.876731	-0.165434	0.0434844	-1.40312	0.0486547
Q6A0C7	Ras-related protein Rab-21	no	0.215488	0.51059	0.238749	-0.503464	-0.355752	0.117985	-0.114289	-0.476875	-0.641173	-0.133294	-0.527105	0.297253	0	Ras-related protein Rab-21	0.115341	-0.207233	0.216872	0.132026	0.260294	0	0	0.322574	1	0		Q99JY0	Trifunctional enzyme subunit beta, mitochondrial;3-ketoacyl-CoA thiolase	0.358396	0.682742	0.78785	-0.195221	-0.201692	0.258149	0.049352	-0.0734089	-0.592049	-0.101242	-0.813043	0.462157
Q8BG05	Heterogeneous nuclear ribonucleoprotein A3	no	-0.360802	-0.14252	0.616457	0.279356	-0.33279	-0.237506	-0.576833	0.186583	-0.0742125	0.124862	-1.34741	0.123041	0	Heterogeneous nuclear ribonucleoprotein A3	0.0981227	-0.240136	0.217952	0.159177	0.260805	0	0	0.338259	1	0		Q9CQV8	14-3-3 protein beta/alpha;14-3-3 protein beta/alpha, N-terminally processed	-0.217893	0.0296322	1.16556	0.587598	-0.178731	-0.0973411	-0.413192	0.59005	-0.0250889	0.156914	-1.63335	0.287945
Q9Z2Y8	Proline synthase co-transcribed bacterial homolog protein	no	-0.162459	-0.38017	-0.632793	-0.268843	-0.308244	-0.445493	0.0247601	0.122279	-0.146193	0.141843	0.737373	0.250746	0	Proline synthase co-transcribed bacterial homolog protein	-0.361066	-0.151674	0.100892	0.134482	0.26283	0	0	-0.209392	0	1		Q91WU5	Arsenite methyltransferase	-0.0195505	-0.208018	-0.0836915	0.0393993	-0.154185	-0.305329	0.188401	0.525746	-0.0970697	0.173895	0.451435	0.41565
P46638	Ras-related protein Rab-11B;Ras-related protein Rab-11A	no	-0.111513	-0.604363	0.621465	-0.180385	-0.31841	-0.515232	-0.202833	-0.671541	-0.477359	0.139923	-0.846134	-0.389896	0	Ras-related protein Rab-11B;Ras-related protein Rab-11A	-0.0686992	-0.427004	0.254553	0.103934	0.262913	0	0	0.358305	1	0		Q8C243	Cathepsin D	0.0313951	-0.432211	1.17057	0.127857	-0.164351	-0.375067	-0.0391917	-0.268075	-0.428236	0.171975	-1.13207	-0.224992
P04247	Myoglobin	no	-1.117	0.985054	-1.00363	-0.764312	-1.00529	-0.237775	-1.9137	-1.8967	0.123492	-1.16355	-0.598177	-1.00512	0	Myoglobin	-0.474971	-1.26337	0.492195	0.402335	0.262947	1	1	0.788396	1	0	Q9D6S7	B1B1A8	Myosin light chain kinase, smooth muscle;Myosin light chain kinase, smooth muscle, deglutamylated form	-0.974092	1.15721	-0.454526	-0.45607	-0.851235	-0.0976109	-1.75006	-1.49324	0.172616	-1.1315	-0.884115	-0.840216
A2AGQ1	Myosin-binding protein C, cardiac-type	no	-1.10529	-0.715747	-0.581387	0.0709651	-1.00119	-0.00625742	0.139351	0.653746	0.113473	0.755548	0.666557	0.472752	0	Myosin-binding protein C, cardiac-type	-0.582864	-0.0535873	0.244622	0.346137	0.263184	0	0	-0.529277	0	1		E9QKG5	Protein PRRC2C	-0.962379	-0.543595	-0.0322854	0.379207	-0.847129	0.133907	0.302992	1.05721	0.162597	0.7876	0.380619	0.637657
Q9Z0J0	Epididymal secretory protein E1	no	0.788699		1.01367	0.0387163	-0.343773		0.590819	0.0299816	-0.947285		-0.649565	0.0900525	0	Epididymal secretory protein E1	0.613694	0.0923426	0.294733	0.271589	0.263625	0	0	0.521351	1	0	P10107	Q8C266	Ras-related protein Rab-5C;Ras-related protein Rab-5B;Ras-related protein Rab-5A	0.931607		1.56277	0.346958	-0.189713		0.75446	0.433448	-0.898162		-0.935503	0.254957
D3YVN7	Elongation factor Tu;Elongation factor Tu, mitochondrial	no	0.121568	0.153225	-0.762856	0.148302	0.00995417	0.14968	0.500842	0.279971	-0.075549	-0.196791	1.30514	0.0617275	0	Elongation factor Tu;Elongation factor Tu, mitochondrial	-0.0849404	0.235112	0.226079	0.104331	0.264629	0	0	-0.320052	0	1		Q9D6R2	Isocitrate dehydrogenase [NAD] subunit alpha, mitochondrial	0.264476	0.325377	-0.213755	0.456544	0.164014	0.289845	0.664483	0.683437	-0.0264254	-0.164739	1.0192	0.226632
Q9QYG0	Protein NDRG2	no	-1.14204	-1.34796	-0.578306	-0.842503	-0.581733	-0.921902	-0.0379899	-1.0119	0.456971	0.269887	0.666224	-0.192094	0	Protein NDRG2	-0.977704	-0.63838	0.168794	0.220525	0.270546	0	0	-0.339324	0	1		F6SJE0	Phosphatidylinositol transfer protein alpha isoform	-0.999135	-1.17581	-0.0292052	-0.534261	-0.427673	-0.781737	0.125651	-0.608431	0.506094	0.301939	0.380286	-0.0271898
P30115	Glutathione S-transferase A3;Glutathione S-transferase A1;Glutathione S-transferase;Glutathione S-transferase A2	no	0.848337	0.195859		-0.408143	0.121424	-0.773456		-0.45226	-0.601005	-1.08429		-0.115971	0	Glutathione S-transferase A3;Glutathione S-transferase A1;Glutathione S-transferase;Glutathione S-transferase A2	0.212018	-0.368097	0.362805	0.261735	0.270843	1	1	0.580115	1	0		Q6P9R2	Serine/threonine-protein kinase OSR1	0.991245	0.368011		-0.0999011	0.275484	-0.633292		-0.0487942	-0.551881	-1.05224		0.0489337
Q8K1M6	Dynamin-1-like protein	no	-0.175931	-0.145374	-0.0318759	0.231928	-0.0855952	-0.364081	-0.858312	0.0598045	0.0798296	-0.274124	-0.716054	0.0406133	0	Dynamin-1-like protein	-0.0303134	-0.312046	0.0927435	0.20221	0.270921	0	0	0.281733	1	0		P48428	Tubulin-specific chaperone A	-0.0330232	0.0267782	0.517225	0.54017	0.0684644	-0.223917	-0.694671	0.463271	0.128953	-0.242072	-1.00199	0.205518
D3YTN4	GTPase IMAP family member 4	no	-0.270135	0.122905	0.949048	0.392537	0.240784	-0.0659361	-0.618345	0.0860985	0.444626	-0.216313	-1.36919	0.00296743	0	GTPase IMAP family member 4	0.298589	-0.0893496	0.255968	0.187117	0.271002	0	0	0.387938	1	0		Q9JJW5	Myozenin-2	-0.127226	0.295057	1.49815	0.700779	0.394843	0.0742284	-0.454704	0.489565	0.49375	-0.184261	-1.65513	0.167872
P35505	Fumarylacetoacetase	no	0.108417	0.440419	-0.271355	-0.122144	-0.135425	0.304	-0.628165	-1.04159	-0.286494	-0.585288	-0.416648	-1.0235	0	Fumarylacetoacetase	0.0388343	-0.375294	0.154985	0.292527	0.271277	0	0	0.414129	1	0		P54071	Isocitrate dehydrogenase [NADP], mitochondrial	0.251325	0.612571	0.277747	0.186098	0.0186342	0.444164	-0.464524	-0.63812	-0.237371	-0.553236	-0.702585	-0.858593
Q3TJM2	Ubiquinone biosynthesis monooxygenase COQ6	no	0.55762	1.32432	-0.636114	0.537875	1.38884	0.923215	0.362628	1.46745	0.850129	-0.222078	0.511089	0.350304	0	Ubiquinone biosynthesis monooxygenase COQ6	0.445924	1.03553	0.404486	0.254427	0.271543	1	1	-0.589609	0	1		Q9D1E6	Tubulin-folding cofactor B	0.700528	1.49647	-0.0870129	0.846117	1.5429	1.06338	0.526269	1.87092	0.899253	-0.190026	0.225152	0.515208
Q3U1J4	DNA damage-binding protein 1	no	-0.00776745	0.523314	-0.202797	-0.191519	0.357914	0.916807	-0.18829	0.413664	0.244835	0.219637	0.238391	0.272004	0	DNA damage-binding protein 1	0.0303076	0.375024	0.170306	0.225949	0.272119	0	0	-0.344716	0	1		P56480	ATP synthase subunit beta, mitochondrial	0.135141	0.695466	0.346305	0.116723	0.511974	1.05697	-0.0246486	0.81713	0.293959	0.251689	-0.0475471	0.436908
A6H584	Collagen alpha-5(VI) chain;Collagen alpha-6(VI) chain	no	0.840259	-0.686552	3.12626		-0.08532	-1.1285	-0.431728		-0.77052	-0.525003	-3.3305		0	Collagen alpha-5(VI) chain;Collagen alpha-6(VI) chain	1.09332	-0.548517	1.10791	0.306751	0.273727	1	1	1.64184	1	0		Q91ZJ5	UTP--glucose-1-phosphate uridylyltransferase	0.983167	-0.5144	3.67536		0.0687396	-0.988339	-0.268087		-0.721397	-0.492951	-3.61644
P14069	Protein S100-A6	no	0.874444	0.255404	2.88439	0.795153	0.202422	-0.0233316	0.499385	1.00072	-0.594527	-0.503101	-2.19942	0.00219673	0	Protein S100-A6	1.20235	0.4198	0.5773	0.221251	0.27656	1	1	0.782548	1	0	Q9CX80	F8VQC7	Kinectin	1.01735	0.427557	3.43349	1.10339	0.356482	0.116833	0.663026	1.40419	-0.545403	-0.471049	-2.48536	0.167101
P31938	Dual specificity mitogen-activated protein kinase kinase 1;SH2 domain-containing protein 6	no	0.407894	0.677444	1.02015	0.628172	0.286361	0.653968	-0.448609	0.749114	-0.0473934	-0.234956	-1.45541	0.142291	0	Dual specificity mitogen-activated protein kinase kinase 1;SH2 domain-containing protein 6	0.683414	0.310208	0.126619	0.271904	0.277716	0	0	0.373206	1	0		P48787	Troponin I, cardiac muscle	0.550802	0.849596	1.56925	0.936414	0.440421	0.794132	-0.284968	1.15258	0.00173014	-0.202904	-1.74135	0.307195
Q9WTP7	GTP:AMP phosphotransferase, mitochondrial	no	0.0325205	0.822491	-0.221989	0.112095	-0.0216802	0.344769	-0.76354	-0.368626	-0.0384869	-0.496815	-0.566156	-0.492325	0	GTP:AMP phosphotransferase, mitochondrial	0.186279	-0.202269	0.223717	0.237094	0.27843	0	0	0.388549	1	0		Q8K0D5	Elongation factor G, mitochondrial	0.175429	0.994643	0.327112	0.420337	0.132379	0.484934	-0.599899	0.03484	0.0106367	-0.464763	-0.852094	-0.327421
Q9D6R2	Isocitrate dehydrogenase [NAD] subunit alpha, mitochondrial	no	0.036348	-0.487834	-0.186996	-0.292124	-0.229139	-0.833484	-0.152718	-0.677758	-0.296221	-0.416523	0.0389776	-0.375651	0	Isocitrate dehydrogenase [NAD] subunit alpha, mitochondrial	-0.232652	-0.473275	0.109202	0.166814	0.279765	0	0	0.240623	1	0	E9Q5D9	Q6P3Z7	Troponin T, cardiac muscle	0.179256	-0.315682	0.362105	0.0161181	-0.0750792	-0.69332	0.010923	-0.274292	-0.247097	-0.384471	-0.24696	-0.210747
Q3U2G2	Heat shock 70 kDa protein 4	no	-0.271002	-0.235379	-0.125362	-0.452027	-0.0583376	-0.239527	0.25255	-0.329299	0.123236	-0.00688127	0.295858	0.214828	0	Heat shock 70 kDa protein 4	-0.270942	-0.0936532	0.0678542	0.128424	0.281645	0	0	-0.177289	0	1		E9Q8T1		-0.128093	-0.0632269	0.423739	-0.143785	0.095722	-0.0993626	0.416191	0.0741676	0.172359	0.0251707	0.00992034	0.379732
P29595	NEDD8	no	-0.144944	-1.10187	-0.812678	-0.0773029	-0.347975	-1.38742	-0.833358	-1.16993	-0.301796	-0.0690218	0.234	-1.01728	0	NEDD8	-0.534198	-0.934673	0.251673	0.22635	0.281982	0	0	0.400474	1	0		Q8BYM8	Probable cysteine--tRNA ligase, mitochondrial	-0.00203565	-0.929715	-0.263577	0.230939	-0.193915	-1.24726	-0.669717	-0.766468	-0.252673	-0.0369699	-0.0519374	-0.852381
P48428	Tubulin-specific chaperone A	no	-0.22324		0.427336	-0.194722	-0.308822		-0.202433	-0.398582	-0.287736		-0.66134	-0.18406	0	Tubulin-specific chaperone A	0.00312451	-0.303279	0.212265	0.0566912	0.283293	0	0	0.306403	1	0		Q9CZ13	Cytochrome b-c1 complex subunit 1, mitochondrial	-0.0803319		0.976437	0.11352	-0.154763		-0.0387916	0.00488457	-0.238613		-0.947278	-0.0191557
P56399	Ubiquitin carboxyl-terminal hydrolase 5;Ubiquitin carboxyl-terminal hydrolase	no	-0.185202	0.118151	0.852093	0.104719	0.637129	0.101481	0.865847	0.581807	0.710714	0.0781776	0.14129	0.358858	0	Ubiquitin carboxyl-terminal hydrolase 5;Ubiquitin carboxyl-terminal hydrolase	0.222441	0.546566	0.221241	0.160594	0.284673	0	0	-0.324126	0	1	P51881	Q921H8	3-ketoacyl-CoA thiolase A, peroxisomal;3-ketoacyl-CoA thiolase B, peroxisomal	-0.0422934	0.290303	1.40119	0.412962	0.791189	0.241646	1.02949	0.985273	0.759838	0.110229	-0.144648	0.523763
Q9CY64	Biliverdin reductase A	no	0.0146528	0.178426	-0.260447	0.184323	0.0312995	0.0449489	-0.389999	-0.282215	-0.0867152	-0.165247	0.110323	-0.259137	0	Biliverdin reductase A	0.0292387	-0.148991	0.104259	0.110284	0.28487	0	0	0.17823	1	0		Q8CHP8	Phosphoglycolate phosphatase	0.157561	0.350578	0.288654	0.492566	0.185359	0.185113	-0.226358	0.121251	-0.0375916	-0.133195	-0.175615	-0.0942332
Q8C483	Serine--tRNA ligase, cytoplasmic	no	-0.00684815	0.195747	-0.0241349	0.148559	0.166945	0.181079	0.0245068	0.340634	0.11862	-0.178104	-0.0994182	0.219809	0	Serine--tRNA ligase, cytoplasmic	0.0783308	0.178291	0.0551311	0.064641	0.284977	0	0	-0.0999603	0	1		Q8BK30	NADH dehydrogenase [ubiquinone] flavoprotein 3, mitochondrial	0.13606	0.367899	0.524966	0.456801	0.321005	0.321243	0.188148	0.744101	0.167743	-0.146052	-0.385356	0.384713
P35486	Pyruvate dehydrogenase E1 component subunit alpha, somatic form, mitochondrial	no	0.00622095	0.632727	-0.0437184	0.352917	1.08839	0.579829	0.0366124	0.505491	1.10559	-0.0723115	0.0990521	0.115696	0	Pyruvate dehydrogenase E1 component subunit alpha, somatic form, mitochondrial	0.237037	0.552581	0.158666	0.215305	0.286441	0	0	-0.315544	0	1		Q8VDK1	Nitrilase homolog 1	0.149129	0.804879	0.505383	0.661159	1.24245	0.719994	0.200253	0.908957	1.15471	-0.0402595	-0.186886	0.2806
Q8C5H8	NAD kinase domain-containing protein 1	no	-0.19976	0.564669	-0.894061	0.349271	-0.490597	0.106265	-0.442085	-1.71811	-0.203678	-0.263635	0.307844	-2.1035	0	NAD kinase domain-containing protein 1	-0.04497	-0.63613	0.325577	0.385211	0.286766	1	1	0.59116	1	0		P28665	Murinoglobulin-1	-0.0568514	0.736821	-0.34496	0.657513	-0.336537	0.24643	-0.278444	-1.31464	-0.154554	-0.231583	0.0219061	-1.9386
Q9D967	Magnesium-dependent phosphatase 1	no		0.549031	0.891957	1.20881		0.497124	-1.19934	0.739939		-0.0196978	-1.93663	-0.488763	0	Magnesium-dependent phosphatase 1	0.883264	0.0125751	0.19051	0.609997	0.287358	1	1	0.870689	1	0		Q9WTR5	Cadherin-13		0.721183	1.44106	1.51705		0.637289	-1.0357	1.14341		0.0123541	-2.22257	-0.323859
Q7TQ48	Sarcalumenin	no	-0.00108315	-0.0551316	-0.679293	-0.210277	-0.568847	-0.486129	-0.424968	-0.280064	-0.610384	-0.453239	0.297004	-0.0879348	0	Sarcalumenin	-0.236446	-0.440002	0.154129	0.06092	0.288041	0	0	0.203556	1	0		Q9DC77	Small muscular protein	0.141825	0.11702	-0.130192	0.097965	-0.414787	-0.345964	-0.261327	0.123402	-0.56126	-0.421187	0.0110662	0.0769695
E9Q0S6	0	no	-0.554449	0.554249	0.59377	-0.237912	-0.665791	0.301901	-1.11161	-0.128762	0.0742778	-0.0107144	-1.66571	-0.0789357	0	0	0.0889144	-0.401067	0.287539	0.308663	0.289753	0	0	0.489981	1	0		Q8BH59	Calcium-binding mitochondrial carrier protein Aralar1	-0.411541	0.726401	1.14287	0.0703302	-0.511732	0.442066	-0.947974	0.274704	0.123401	0.0213375	-1.95165	0.0859685
Q9CR24	Nucleoside diphosphate-linked moiety X motif 8, mitochondrial	no	-0.340442	0.250542	-0.967181	-0.206582	-0.0520062	0.551149	-0.176524	-0.156403	0.15777	0.289876	0.548371	0.0855722	0	Nucleoside diphosphate-linked moiety X motif 8, mitochondrial	-0.315916	0.0415539	0.25126	0.172043	0.29042	0	0	-0.35747	0	1		P20152	Vimentin	-0.197534	0.422694	-0.41808	0.10166	0.102053	0.691313	-0.0128829	0.247063	0.206893	0.321928	0.262433	0.250476
P97371	Proteasome activator complex subunit 1	no	-0.0913274	-1.04289	0.0736418	-0.688528	-0.381566	-1.34468	-0.655922	-0.904166	-0.362547	-0.325994	-0.656979	-0.423623	0	Proteasome activator complex subunit 1	-0.437276	-0.821584	0.259906	0.204432	0.291613	0	0	0.384307	1	0		Q01730	Ras suppressor protein 1	0.0515809	-0.87074	0.622743	-0.380286	-0.227506	-1.20452	-0.492281	-0.5007	-0.313423	-0.293942	-0.942917	-0.258719
Q8CGC7	Bifunctional glutamate/proline--tRNA ligase;Glutamate--tRNA ligase;Proline--tRNA ligase	no	-0.317041	1.4695	0.31753	0.299616	0.621876	1.36611	0.56676	1.23369	1.06571	0.0736261	-0.172864	0.989226	0	Bifunctional glutamate/proline--tRNA ligase;Glutamate--tRNA ligase;Proline--tRNA ligase	0.4424	0.947108	0.372789	0.205777	0.29266	0	0	-0.504707	0	1		Q9WTX5	S-phase kinase-associated protein 1	-0.174133	1.64165	0.866631	0.607858	0.775935	1.50627	0.730401	1.63715	1.11483	0.105678	-0.458802	1.15413
Q91VA7	0	no	0.128278	0.783356	-0.383929	1.01084	-0.121112	0.187184	0.26643	-0.509412	-0.26144	-0.418105	0.568081	-1.63992	0	0	0.384636	-0.0442277	0.317217	0.176155	0.293671	0	0	0.428864	1	0		Q8BHD0	Ras-related protein Rab-39A;Ras-related protein Rab-6A;Ras-related protein Rab-6B	0.271187	0.955508	0.165172	1.31908	0.0329472	0.327348	0.430071	-0.105946	-0.212317	-0.386053	0.282143	-1.47501
Q7TPR4	Alpha-actinin-1	no	1.69386	-0.482725	1.92175		-0.788972	-0.708586	1.07392		-2.48681	0.516187	-0.625133		0	Alpha-actinin-1	1.0443	-0.141211	0.766339	0.60801	0.295429	1	1	1.18551	1	0		P48758	Carbonyl reductase [NADPH] 1	1.83677	-0.310573	2.47085		-0.634912	-0.568421	1.23756		-2.43768	0.548239	-0.911071
E9Q9M1	Cytosolic purine 5-nucleotidase	no		1.26639	0.199618	0.801397		1.32933	0.759774	1.62739		-0.0764267	0.670761	0.680847	0	Cytosolic purine 5-nucleotidase	0.755801	1.23883	0.308793	0.254513	0.296139	0	0	-0.483028	0	1		P10126	Elongation factor 1-alpha 1		1.43854	0.748719	1.10964		1.46949	0.923415	2.03085		-0.0443747	0.384823	0.845751
O88696	Putative ATP-dependent Clp protease proteolytic subunit, mitochondrial	no	-0.338904	0.00157404	-0.493906	0.0518775	-0.355603	-0.36099	-0.197639	-0.58476	0.0154834	-0.267774	0.166992	-0.525802	0	Putative ATP-dependent Clp protease proteolytic subunit, mitochondrial	-0.19484	-0.374748	0.132175	0.0795971	0.296967	0	0	0.179908	1	0		Q3V384	Lactation elevated protein 1	-0.195996	0.173726	0.0551957	0.36012	-0.201543	-0.220825	-0.0339978	-0.181293	0.0646069	-0.235722	-0.118946	-0.360897
Q7M6Y3	Phosphatidylinositol-binding clathrin assembly protein	no	0.40128	0.847633	1.19139	0.858455	0.0484521	0.683819	-0.118198	1.13141	-0.402353	-0.157987	-1.38951	0.277854	0	Phosphatidylinositol-binding clathrin assembly protein	0.824691	0.43637	0.162125	0.289012	0.29702	0	0	0.388321	1	0		Q8K0E8	Fibrinogen beta chain;Fibrinopeptide B;Fibrinogen beta chain	0.544189	1.01978	1.7405	1.1667	0.202512	0.823984	0.0454429	1.53487	-0.353229	-0.125935	-1.67544	0.442758
P00920	Carbonic anhydrase 2	no	0.219982	-0.0904314	0.570388	0.696324	-0.187319	0.382821	-0.377262	0.378782	-0.264603	0.561636	-0.825134	-0.34109	0	Carbonic anhydrase 2	0.349066	0.0492556	0.177809	0.195307	0.299989	0	0	0.29981	1	0		F8WIV2	Serpin B6	0.362891	0.0817206	1.11949	1.00457	-0.0332595	0.522986	-0.213621	0.782248	-0.215479	0.593688	-1.11107	-0.176185
B9EHC7	Calsequestrin;Calsequestrin-2	no	0.174743	1.26772	-1.32434	1.30087	1.39255	1.28437	0.0580506	2.10108	1.21295	-0.0736621	1.38476	0.694429	0	Calsequestrin;Calsequestrin-2	0.354747	1.20901	0.61782	0.424251	0.303104	1	1	-0.854266	0	1		P14094	Sodium/potassium-transporting ATPase subunit beta-1	0.317651	1.43987	-0.775243	1.60911	1.54661	1.42453	0.221692	2.50455	1.26207	-0.0416101	1.09882	0.859333
Q9DCT2	NADH dehydrogenase [ubiquinone] iron-sulfur protein 3, mitochondrial	no	0.111807	0.541984	0.85373	0.557327	1.5273	0.324579	0.845491	0.707949	1.6049	-0.229007	-0.110826	0.131994	0	NADH dehydrogenase [ubiquinone] iron-sulfur protein 3, mitochondrial	0.516212	0.85133	0.152702	0.250831	0.305924	0	0	-0.335118	0	1		P56380	Bis(5-nucleosyl)-tetraphosphatase [asymmetrical]	0.254715	0.714136	1.40283	0.865569	1.68136	0.464743	1.00913	1.11142	1.65402	-0.196955	-0.396764	0.296898
D3YW52	Alpha-2-macroglobulin;Alpha-2-macroglobulin 165 kDa subunit;Alpha-2-macroglobulin 35 kDa subunit	no	0.0624842	-0.00209896	0.674692	0.279399	0.201182	-0.11093	0.30687	-0.322753	0.0716264	-0.149213	-0.294135	-0.601512	0	Alpha-2-macroglobulin;Alpha-2-macroglobulin 165 kDa subunit;Alpha-2-macroglobulin 35 kDa subunit	0.253619	0.0185923	0.152723	0.144261	0.306168	0	0	0.235027	1	0		Q8C483	Serine--tRNA ligase, cytoplasmic	0.205393	0.170053	1.22379	0.587641	0.355242	0.0292347	0.470511	0.0807133	0.12075	-0.117161	-0.580073	-0.436607
Q9Z0X1	Apoptosis-inducing factor 1, mitochondrial	no	-0.265651	-0.329325	-0.259975	-0.254404	-0.351643	0.357179	0.147862	-0.367665	0.00412688	0.453272	0.434417	-0.181781	0	Apoptosis-inducing factor 1, mitochondrial	-0.277339	-0.0535667	0.0174802	0.181841	0.306572	0	0	-0.223772	0	1		Q61941	NAD(P) transhydrogenase, mitochondrial	-0.122743	-0.157173	0.289126	0.0538381	-0.197583	0.497343	0.311503	0.0358011	0.0532504	0.485324	0.148479	-0.0168769
P63242	Eukaryotic translation initiation factor 5A-1;Eukaryotic translation initiation factor 5A-2	no	-0.425873	-1.33559	-0.850865	-0.618815	-0.51392	-1.08044	-0.187351	-0.147421	-0.116352	0.481439	0.596394	0.544475	0	Eukaryotic translation initiation factor 5A-1;Eukaryotic translation initiation factor 5A-2	-0.807785	-0.482284	0.196213	0.215622	0.307271	0	0	-0.325501	0	1	E9QN70	B2RPU8	Coiled-coil-helix-coiled-coil-helix domain-containing protein 2, mitochondrial	-0.282965	-1.16343	-0.301764	-0.310573	-0.35986	-0.94028	-0.0237097	0.256046	-0.0672283	0.513491	0.310457	0.709379
O70400	PDZ and LIM domain protein 1	no	0.0345631	-1.24144	0.090594	-0.81332	0.309144	-0.653756	0.435391	-0.181675	0.472832	0.785981	0.334872	0.734349	0	PDZ and LIM domain protein 1	-0.482401	-0.0227239	0.326755	0.24891	0.308759	0	0	-0.459677	0	1		Q8BWT1	3-ketoacyl-CoA thiolase, mitochondrial	0.177471	-1.06929	0.639695	-0.505078	0.463204	-0.513592	0.599032	0.221791	0.521955	0.818033	0.0489337	0.899253
F7AA26	A-kinase anchor protein 2	no	-0.352553	-1.17093		-1.06176	0.259426	-0.987921		-0.29431	0.551146	0.645479		0.996984	0	A-kinase anchor protein 2	-0.861746	-0.340935	0.25654	0.360832	0.311145	0	0	-0.520812	0	1		F6Z0K0	Trans-1,2-dihydrobenzene-1,2-diol dehydrogenase	-0.209645	-0.998773		-0.753519	0.413486	-0.847756		0.109157	0.60027	0.677531		1.16189
P50580	Proliferation-associated protein 2G4	no	-0.106862	-1.38267	-0.717273	-0.431114	-0.743697	-0.556896	0.0638537	0.157538	-0.594	0.763881	0.71633	0.468666	0	Proliferation-associated protein 2G4	-0.659478	-0.2698	0.271397	0.223783	0.311837	0	0	-0.389678	0	1		P08003	Protein disulfide-isomerase A4	0.0360461	-1.21051	-0.168171	-0.122871	-0.589637	-0.416732	0.227495	0.561005	-0.544877	0.795933	0.430392	0.633571
Q8C6I2	Succinate dehydrogenase assembly factor 2, mitochondrial	no	-0.332358	-1.39841		-1.37209	-1.09252	-1.63806		-1.85015	-0.812637	-0.304994		-0.186709	0	Succinate dehydrogenase assembly factor 2, mitochondrial	-1.03429	-1.52691	0.351047	0.225659	0.313531	0	0	0.49262	1	0		Q3U3G8	Serine hydrolase-like protein	-0.18945	-1.22626		-1.06385	-0.938459	-1.49789		-1.44668	-0.763513	-0.272942		-0.0218044
P62960	Nuclease-sensitive element-binding protein 1	no	-0.69405	-1.08595		0.303227	1.57943	-0.740053		0.474855	2.20317	0.372524		0.158408	0	Nuclease-sensitive element-binding protein 1	-0.492258	0.438076	0.413519	0.669828	0.314713	1	1	-0.930334	0	1		P05202	Aspartate aminotransferase, mitochondrial	-0.551141	-0.913799		0.611469	1.73348	-0.599889		0.878321	2.2523	0.404576		0.323312
Q91V77	Protein S100-A1	no	-0.470619	-0.919325	-0.0387469	-0.45594	-0.651403	-0.904001	-0.375106	-0.937229	-0.313653	-0.106584	-0.286563	-0.558424	0	Protein S100-A1	-0.471157	-0.716935	0.17983	0.130596	0.314987	0	0	0.245777	1	0		Q9D3D9	ATP synthase subunit delta, mitochondrial	-0.32771	-0.747173	0.510354	-0.147697	-0.497343	-0.763836	-0.211465	-0.533763	-0.26453	-0.0745322	-0.572501	-0.39352
Q5XJY5	Coatomer subunit delta	no	-0.0748566	0.0419375	0.736183		-0.63116	0.0148072	0.126901		-0.5086	0.333081	-0.689317		0	Coatomer subunit delta	0.234421	-0.163151	0.253136	0.236232	0.315147	0	0	0.397572	1	0		Q3UEB3	Poly(U)-binding-splicing factor PUF60	0.0680517	0.21409	1.28528		-0.4771	0.154972	0.290542		-0.459477	0.365133	-0.975255
Q80X50	Ubiquitin-associated protein 2-like	no	-1.18089	-1.39168		-0.520002	-0.246308	-1.03973		-0.603971	1.01085	0.231463		-0.0726969	0	Ubiquitin-associated protein 2-like	-1.03085	-0.630002	0.262575	0.22941	0.315419	0	0	-0.400853	0	1		Q3UM45	Protein phosphatase 1 regulatory subunit 7	-1.03798	-1.21952		-0.21176	-0.0922479	-0.899562		-0.200504	1.05998	0.263515		0.0922074
Q58A65	C-Jun-amino-terminal kinase-interacting protein 4	no	-0.149082	0.234351		-0.665062	0.225118	0.328706		-0.0849425	0.35578	0.196182		0.543504	0	C-Jun-amino-terminal kinase-interacting protein 4	-0.193264	0.156294	0.260576	0.12427	0.316305	0	0	-0.349558	0	1		P63028	Translationally-controlled tumor protein	-0.00617352	0.406503		-0.35682	0.379177	0.468871		0.318524	0.404903	0.228234		0.708408
O08663	Methionine aminopeptidase 2	no	-0.285644	-1.07396	-1.0254	-0.43257	-0.284867	-0.226269	-0.821655	-0.411236	0.000785955	0.647192	0.0195525	0.312462	0	Methionine aminopeptidase 2	-0.704392	-0.436007	0.201837	0.134217	0.316588	0	0	-0.268385	0	1		Q91VB8	Hemoglobin subunit alpha	-0.142736	-0.901803	-0.476298	-0.124328	-0.130808	-0.0861043	-0.658014	-0.00776951	0.0499095	0.679244	-0.266385	0.477367
Q8BXK9	Chloride intracellular channel protein 5	no	0.121928	-0.0816563	-0.697838	0.112713	-0.353663	0.644045	-0.0640092	0.604288	-0.745407	0.986653	0.460472	1.01944	0	Chloride intracellular channel protein 5	-0.136213	0.207665	0.193003	0.247762	0.31793	0	0	-0.343878	0	1		Q8BFS6	Calcineurin-like phosphoesterase domain-containing protein 1	0.264837	0.0904957	-0.148737	0.420955	-0.199603	0.78421	0.0996318	1.00775	-0.696284	1.0187	0.174534	1.18434
Q99LC3	NADH dehydrogenase [ubiquinone] 1 alpha subcomplex subunit 10, mitochondrial	no	0.598063	1.2017	-0.117639	1.25415	1.66238	1.35151	0.212872	1.82281	0.870331	0.00806903	-0.0394388	0.428019	0	NADH dehydrogenase [ubiquinone] 1 alpha subcomplex subunit 10, mitochondrial	0.734067	1.26239	0.320555	0.363259	0.317949	0	0	-0.528324	0	1		Q8C1B7	Septin-11	0.740971	1.37385	0.431463	1.56239	1.81644	1.49167	0.376513	2.22627	0.919454	0.040121	-0.325377	0.592923
E9PX42	Glyceraldehyde-3-phosphate dehydrogenase	no		0.611585	0.308322	-0.672703		0.28912	2.19832	0.349554		-0.256218	1.68675	1.17907	0	Glyceraldehyde-3-phosphate dehydrogenase	0.0824018	0.945666	0.387569	0.626572	0.318165	1	1	-0.863264	0	1		Q9WTQ5	A-kinase anchor protein 12		0.783737	0.857424	-0.36446		0.429285	2.36197	0.75302		-0.224166	1.40081	1.34398
Q07113	Cation-independent mannose-6-phosphate receptor	no	-0.0896578	0.483269	-1.75506	1.72574	-0.435604	-0.4629	-0.571043	-1.74146	-0.23006	-0.587851	0.90126	-3.60196	0	Cation-independent mannose-6-phosphate receptor	0.091072	-0.802752	0.72266	0.314267	0.318685	1	1	0.893824	1	0		Q9CQ65	S-methyl-5-thioadenosine phosphorylase	0.0532504	0.655421	-1.20596	2.03398	-0.281544	-0.322736	-0.407402	-1.338	-0.180937	-0.555799	0.615322	-3.43706
Q61239	Protein farnesyltransferase/geranylgeranyltransferase type-1 subunit alpha	no	0.510977	0.0305858	0.0661268	-0.288809	0.59629	-0.0227214	0.686118	0.103276	-0.0422152	-0.207488	0.603126	0.536778	0	Protein farnesyltransferase/geranylgeranyltransferase type-1 subunit alpha	0.0797203	0.340741	0.164417	0.176325	0.320725	0	0	-0.26102	0	1		F7AWB4	UDP-N-acetylhexosamine pyrophosphorylase-like protein 1	0.653886	0.202738	0.615228	0.0194336	0.750349	0.117443	0.849759	0.506742	0.00690831	-0.175436	0.317188	0.701682
F6Z0K0	Trans-1,2-dihydrobenzene-1,2-diol dehydrogenase	no	-0.690439	0.524459	-0.455812	-0.442989	-1.04498	-0.132034	-0.431676	-0.960558	-0.130005	-0.536316	-0.034224	-0.484724	0	Trans-1,2-dihydrobenzene-1,2-diol dehydrogenase	-0.266195	-0.642312	0.269618	0.217595	0.321116	0	0	0.376117	1	0		P27546	Microtubule-associated protein 4;Microtubule-associated protein	-0.547531	0.696611	0.0932897	-0.134747	-0.89092	0.00813082	-0.268035	-0.557091	-0.0808812	-0.504264	-0.320162	-0.31982
Q8VBW6	NEDD8-activating enzyme E1 regulatory subunit	no	-0.444654	0.142814	-0.21625	-0.6584	-0.179589	0.159449	0.159556	-0.378407	0.391404	-0.0114253	0.133887	0.166916	0	NEDD8-activating enzyme E1 regulatory subunit	-0.294123	-0.0597476	0.171351	0.132931	0.32377	0	0	-0.234375	0	1		Q9JMA1	Ubiquitin carboxyl-terminal hydrolase 14;Ubiquitin carboxyl-terminal hydrolase	-0.301746	0.314966	0.332851	-0.350158	-0.0255294	0.299613	0.323197	0.0250596	0.440527	0.0206267	-0.152051	0.33182
P51660	Peroxisomal multifunctional enzyme type 2;(3R)-hydroxyacyl-CoA dehydrogenase;Enoyl-CoA hydratase 2	no	-0.119724	-0.226653	-0.710964	-0.0830313	-0.871062	-0.0919611	-0.918851	-0.339243	-0.679428	0.0582595	-0.0364591	-0.340568	0	Peroxisomal multifunctional enzyme type 2;(3R)-hydroxyacyl-CoA dehydrogenase;Enoyl-CoA hydratase 2	-0.285093	-0.555279	0.145189	0.202739	0.324287	0	0	0.270186	1	0		Q60692	Proteasome subunit beta type-6	0.0231843	-0.0545011	-0.161863	0.225211	-0.717003	0.0482033	-0.75521	0.0642235	-0.630305	0.0903115	-0.322397	-0.175664
Q9D0I6	WD repeat, SAM and U-box domain-containing protein 1	no	-0.275233	-0.117475	-1.18601		0.0645356	-0.00700122	-0.340527		0.369444	-0.0272989	0.867819		0	WD repeat, SAM and U-box domain-containing protein 1	-0.526239	-0.094331	0.333013	0.124818	0.32495	0	0	-0.431908	0	1		O88544	COP9 signalosome complex subunit 4	-0.132325	0.054677	-0.636907		0.218595	0.133163	-0.176887		0.418568	0.00475299	0.581881
Q9CYR0	Single-stranded DNA-binding protein, mitochondrial	no	-0.363169	-0.996472	-2.2337	-1.1616	-0.525538	-0.833038	0.0262785	-1.34058	-0.00549913	-0.0219883	2.31231	-0.107627	0	Single-stranded DNA-binding protein, mitochondrial	-1.18873	-0.668221	0.388502	0.286054	0.325555	0	0	-0.520514	0	1		P51667	Myosin regulatory light chain 2, ventricular/cardiac muscle isoform	-0.220261	-0.82432	-1.6846	-0.853357	-0.371478	-0.692874	0.189919	-0.937118	0.0436244	0.0100636	2.02637	0.057277
Q9CX56	26S proteasome non-ATPase regulatory subunit 8	no	-0.00737335	0.325375		-0.11591	0.290607	0.327648		0.108636	0.461838	0.214782		0.0720475	0	26S proteasome non-ATPase regulatory subunit 8	0.0673637	0.242297	0.132756	0.0676807	0.325799	0	0	-0.174933	0	1		P07724	Serum albumin	0.135535	0.497527		0.192332	0.444667	0.467813		0.512102	0.510962	0.246834		0.236952
Q9QYB1	Chloride intracellular channel protein 4	no	0.29176	-0.102216	0.171352	-0.489917	0.279327	0.0422451	0.490978	-0.0335734	0.0894288	0.00413493	0.145415	0.481351	0	Chloride intracellular channel protein 4	-0.0322551	0.194744	0.173395	0.119127	0.327081	0	0	-0.226999	0	1		Q3U3J1	2-oxoisovalerate dehydrogenase subunit alpha, mitochondrial	0.434668	0.0699364	0.720454	-0.181675	0.433387	0.18241	0.654619	0.369893	0.138552	0.0361869	-0.140523	0.646255
F6ZJB0	Ras GTPase-activating-like protein IQGAP1	no	0.133052	1.48579		0.591911	0.821424	1.74422		1.27294	0.743315	0.108596		0.378592	0	Ras GTPase-activating-like protein IQGAP1	0.736919	1.27953	0.397177	0.266408	0.328294	0	0	-0.542609	0	1		Q9CPU5	RNA-binding protein with multiple splicing	0.275961	1.65795		0.900153	0.975483	1.88438		1.67641	0.792439	0.140648		0.543496
Q91WK1	SPRY domain-containing protein 4	no	-0.114763	0.774653	-0.169702	0.430335	-0.404465	0.44919	-0.141309	-0.228747	-0.301504	-0.423356	0.0973432	-0.362984	0	SPRY domain-containing protein 4	0.230131	-0.0813327	0.226459	0.185112	0.329442	0	0	0.311463	1	0		Q8CG76	Aflatoxin B1 aldehyde reductase member 2	0.0281448	0.946805	0.379399	0.738577	-0.250406	0.589355	0.0223323	0.174719	-0.252381	-0.391304	-0.188595	-0.19808
O08553	Dihydropyrimidinase-related protein 2	no	0.484885	0.793491	0.900223	0.190038	0.605948	0.959238	0.652426	0.956913	0.208611	0.162161	-0.259149	0.708279	0	Dihydropyrimidinase-related protein 2	0.59216	0.793631	0.160376	0.0954158	0.330686	0	0	-0.201472	0	1	Q62000	Q9WUA2	Phenylalanine--tRNA ligase beta subunit	0.627794	0.965643	1.44932	0.498281	0.760008	1.0994	0.816067	1.36038	0.257735	0.194213	-0.545087	0.873183
Q8BMF4	Dihydrolipoyllysine-residue acetyltransferase component of pyruvate dehydrogenase complex, mitochondrial	no	-0.129839	-0.261243	0.277091	-0.564649	1.36059	-0.111195	0.322919	-0.399971	1.52454	0.126544	0.148639	0.196303	0	Dihydrolipoyllysine-residue acetyltransferase component of pyruvate dehydrogenase complex, mitochondrial	-0.16966	0.293087	0.174541	0.385598	0.333234	0	0	-0.462747	0	1		O35459	Delta(3,5)-Delta(2,4)-dienoyl-CoA isomerase, mitochondrial	0.0130691	-0.0890913	0.826193	-0.256407	1.51465	0.0289697	0.48656	0.00349556	1.57367	0.158596	-0.137299	0.361207
Q922D4	Serine/threonine-protein phosphatase 6 regulatory subunit 3	no	-0.0794054	0.285461	-0.105282		0.392403	0.626586	-0.0862613		0.476845	0.463746	0.00782682		0	Serine/threonine-protein phosphatase 6 regulatory subunit 3	0.0335911	0.310909	0.126156	0.209777	0.333239	0	0	-0.277318	0	1		P0CG50	Polyubiquitin-C;Ubiquitin;Ubiquitin-related 1;Ubiquitin-related 2;Polyubiquitin-B;Ubiquitin;Ubiquitin-40S ribosomal protein S27a;Ubiquitin;40S ribosomal protein S27a;Ubiquitin-60S ribosomal protein L40;Ubiquitin;60S ribosomal protein L40	0.0635029	0.457613	0.443819		0.546462	0.76675	0.0773797		0.525969	0.495798	-0.278111
P63073	Eukaryotic translation initiation factor 4E	no	0.072584	-0.553657	-0.488224	-0.634549	0.00879497	-0.288253	0.0196867	-0.488619	-0.0149078	0.24224	0.453039	-0.0514705	0	Eukaryotic translation initiation factor 4E	-0.400962	-0.187097	0.16066	0.123248	0.33414	0	0	-0.213864	0	1	P16110	Q99PL5	Ribosome-binding protein 1	0.215492	-0.381505	0.0608775	-0.326307	0.162855	-0.148088	0.183328	-0.0851526	0.0342158	0.274292	0.167101	0.113434
Q8K0D5	Elongation factor G, mitochondrial	no	-0.469569	0.592243	-0.434334	-0.289072	0.049079	0.462799	0.142855	-0.0630254	0.525608	-0.232235	0.479016	0.187289	0	Elongation factor G, mitochondrial	-0.150183	0.147927	0.250539	0.113079	0.336766	0	0	-0.29811	0	1	Q9CR62	Q8R1C9	Amyloid beta A4 precursor protein-binding family B member 3	-0.326661	0.764396	0.114767	0.0191704	0.203139	0.602964	0.306496	0.340441	0.574731	-0.200183	0.193078	0.352193
Q8R550	SH3 domain-containing kinase-binding protein 1	no	-0.359309	-1.14587		-0.853321	-0.720993	-1.16548		-1.57416	-0.164424	-0.0621408		-0.818191	0	SH3 domain-containing kinase-binding protein 1	-0.786168	-1.15354	0.229531	0.24636	0.336849	0	0	0.367376	1	0	P97449	Q9ES46	Beta-parvin	-0.216401	-0.973721		-0.545079	-0.566934	-1.02531		-1.17069	-0.115301	-0.0300888		-0.653287
E9QPX3	NADH dehydrogenase [ubiquinone] iron-sulfur protein 4, mitochondrial	no	-0.364447	-1.37391	-0.920449	-0.987215	0.1188	-1.23555	-0.389088	-0.667342	0.573245	0.139155	0.42331	0.170922	0	NADH dehydrogenase [ubiquinone] iron-sulfur protein 4, mitochondrial	-0.911506	-0.543295	0.207947	0.282364	0.337533	0	0	-0.368211	0	1		E9QA16		-0.221539	-1.20176	-0.371348	-0.678973	0.272859	-1.09538	-0.225447	-0.263876	0.622368	0.171207	0.137372	0.335826
Q9WUB3	Glycogen phosphorylase, muscle form;Phosphorylase	no	0.321342	2.03568	-0.312394	2.13893	1.45058	1.62772	1.53804	2.44358	1.16662	-0.377067	1.8671	0.218261	0	Glycogen phosphorylase, muscle form;Phosphorylase	1.04589	1.76498	0.61538	0.229073	0.337723	1	1	-0.719093	0	1		P56392	Cytochrome c oxidase subunit 7A1, mitochondrial	0.46425	2.20783	0.236707	2.44717	1.60464	1.76788	1.70168	2.84705	1.21574	-0.345015	1.58116	0.383165
Q9WTP6	Adenylate kinase 2, mitochondrial	no	0.121568	-0.686148	0.112466	-0.462696	-0.487703	-0.684254	-0.0236476	-0.850675	-0.605559	-0.153868	-0.273854	-0.197559	0	Adenylate kinase 2, mitochondrial	-0.228702	-0.51157	0.204755	0.178757	0.33882	0	0	0.282868	1	0		P09055	Integrin beta-1	0.264476	-0.513996	0.661567	-0.154454	-0.333643	-0.54409	0.139993	-0.447209	-0.556436	-0.121816	-0.559792	-0.0326543
P97315	Cysteine and glycine-rich protein 1	no	1.17069	0.951911	0.788953	0.171029	0.806452	1.02952	1.10306	1.13563	-0.250484	0.19495	0.216017	1.08975	0	Cysteine and glycine-rich protein 1	0.770645	1.01866	0.214625	0.074137	0.340581	0	0	-0.24802	0	1		Q8R1H0	Homeodomain-only protein	1.31359	1.12406	1.33805	0.479271	0.960512	1.16968	1.2667	1.5391	-0.20136	0.227002	-0.0699212	1.25466
Q8K1M3	cAMP-dependent protein kinase type II-alpha regulatory subunit	no	-0.431942	-0.147004	-0.201209	-0.485075	-0.235338	0.368896	-0.193671	-0.404908	0.312645	0.31584	-0.0829485	0.0437378	0	cAMP-dependent protein kinase type II-alpha regulatory subunit	-0.316308	-0.116255	0.083549	0.168044	0.341418	0	0	-0.200053	0	1		Q8R2P8	Lysyl-tRNA synthetase;Lysine--tRNA ligase	-0.289034	0.0251477	0.347892	-0.176833	-0.081278	0.50906	-0.0300299	-0.00144204	0.361768	0.347892	-0.368886	0.208642
Q3TYK4	cAMP-dependent protein kinase type I-alpha regulatory subunit	no	0.0751909	0.486728	0.0972458	0.405184	0.464837	0.930318	0.00281745	0.593363	0.217873	0.383058	-0.0408313	0.252152	0	cAMP-dependent protein kinase type I-alpha regulatory subunit	0.266087	0.497834	0.105269	0.191985	0.341665	0	0	-0.231747	0	1		Q64010	Adapter molecule crk	0.218099	0.65888	0.646347	0.713426	0.618896	1.07048	0.166458	0.99683	0.266996	0.41511	-0.326769	0.417056
Q8R0N6	Hydroxyacid-oxoacid transhydrogenase, mitochondrial	no		-1.58764	-1.07922	0.249319		-0.617324	0.435391	-0.134006		1.05833	1.64771	-0.149264	0	Hydroxyacid-oxoacid transhydrogenase, mitochondrial	-0.805846	-0.105313	0.547617	0.304231	0.341933	1	1	-0.700533	0	1		F8WJE0	SAM domain and HD domain-containing protein 1		-1.41549	-0.530114	0.557561		-0.477159	0.599032	0.26946		1.09038	1.36177	0.0156403
Q8R2Y2	Cell surface glycoprotein MUC18	no	0.33963	-0.735798	0.267294	-0.562352	-0.446182	-0.521005	-0.139889	-0.944188	-0.809823	0.0388869	-0.484277	-0.394574	0	Cell surface glycoprotein MUC18	-0.172807	-0.512816	0.277637	0.165747	0.342109	0	0	0.340009	1	0		Q9JM76	Actin-related protein 2/3 complex subunit 3	0.482538	-0.563646	0.816395	-0.25411	-0.292122	-0.38084	0.0237521	-0.540722	-0.7607	0.0709388	-0.770215	-0.22967
Q61599	Rho GDP-dissociation inhibitor 2	no	1.02143	0.208707	1.04697	-0.0308131	0.461168	0.191607	0.250603	0.0791674	-0.422488	-0.123516	-0.554898	-0.00993227	0	Rho GDP-dissociation inhibitor 2	0.561574	0.245637	0.277266	0.0801612	0.343258	0	0	0.315938	1	0		P62196	26S protease regulatory subunit 8	1.16434	0.380859	1.59608	0.277429	0.615228	0.331772	0.414244	0.482634	-0.373365	-0.0914637	-0.840836	0.154972
Q8BHD0	Ras-related protein Rab-39A;Ras-related protein Rab-6A;Ras-related protein Rab-6B	no	0.272959	0.626992		0.383607	-0.219958	0.488622		0.232477	-0.536967	-0.322232		-0.288684	0	Ras-related protein Rab-39A;Ras-related protein Rab-6A;Ras-related protein Rab-6B	0.427852	0.167047	0.104568	0.207149	0.343926	0	0	0.260805	1	0		Q91WD5	NADH dehydrogenase [ubiquinone] iron-sulfur protein 2, mitochondrial	0.415867	0.799144		0.691849	-0.0658988	0.628787		0.635943	-0.487844	-0.29018		-0.12378
P06801	NADP-dependent malic enzyme;Malic enzyme	no	0.47946	1.3957	0.895248	0.612083	0.561658	1.11492	-0.239267	0.52096	0.0490265	-0.500344	-1.34987	-0.186635	0	NADP-dependent malic enzyme;Malic enzyme	0.845623	0.489567	0.202827	0.278155	0.344415	0	0	0.356056	1	0		O55126	Protein NipSnap homolog 2	0.622368	1.56785	1.44435	0.920325	0.715718	1.25508	-0.0756264	0.924426	0.09815	-0.468292	-1.63581	-0.0217311
Q8C605	6-phosphofructokinase;6-phosphofructokinase type C	no	-0.0900751	0.405636	-0.291487	1.93788	0.662581	1.07033	1.07832	1.44545	0.759303	0.541226	1.32767	-0.478077	0	6-phosphofructokinase;6-phosphofructokinase type C	0.490489	1.06417	0.504206	0.159919	0.345392	1	1	-0.573684	0	1		F2Z456	NADH-cytochrome b5 reductase 3;NADH-cytochrome b5 reductase 3 membrane-bound form;NADH-cytochrome b5 reductase 3 soluble form	0.0528332	0.577789	0.257614	2.24612	0.816641	1.2105	1.24196	1.84892	0.808426	0.573278	1.04173	-0.313172
Q8VDK1	Nitrilase homolog 1	no	0.126963	0.927188	-0.211105	0.216569	-0.27144	0.194097	0.135017	-0.113868	-0.505667	-0.590802	0.264602	-0.205505	0	Nitrilase homolog 1	0.264904	-0.0140485	0.239195	0.108689	0.345699	0	0	0.278952	1	0		P28650	Adenylosuccinate synthetase isozyme 1	0.269871	1.09934	0.337996	0.524811	-0.11738	0.334262	0.298658	0.289598	-0.456544	-0.55875	-0.0213358	-0.0406008
P63254	Cysteine-rich protein 1	no	0.369875		-0.211447	-2.34478	1.99507		3.30703	-1.75022	1.66659		3.49519	0.581495	0	Cysteine-rich protein 1	-0.728785	1.18396	0.825241	1.51519	0.346338	1	1	-1.91274	0	1		F8WIT2	Annexin	0.512783		0.337654	-2.03654	2.14913		3.47067	-1.34676	1.71572		3.20925	0.746399
O88712	C-terminal-binding protein 1	no	-0.287684	-0.537061	-0.253848	-0.250385	-0.310606	-0.426927	-0.0883138	-0.0215921	0.00412688	0.166945	0.258631	0.321141	0	C-terminal-binding protein 1	-0.332244	-0.21186	0.0687884	0.0946354	0.346761	0	0	-0.120385	0	1		F6ZJB0	Ras GTPase-activating-like protein IQGAP1	-0.144776	-0.364909	0.295253	0.0578571	-0.156547	-0.286763	0.0753272	0.381874	0.0532504	0.198997	-0.0273074	0.486045
P45952	Medium-chain specific acyl-CoA dehydrogenase, mitochondrial	no	-0.321476	0.136528	-1.55023	-0.512132	0.478488	-0.0739032	-0.211024	-0.676326	0.785102	-0.197535	1.35681	-0.144989	0	Medium-chain specific acyl-CoA dehydrogenase, mitochondrial	-0.561827	-0.120691	0.356473	0.237714	0.348469	0	0	-0.441135	0	1	F2Z456	Q7TPR4	Alpha-actinin-1	-0.178567	0.30868	-1.00113	-0.20389	0.632547	0.0662612	-0.0473832	-0.272859	0.834226	-0.165483	1.07087	0.0199154
O35857	Mitochondrial import inner membrane translocase subunit TIM44	no	-0.434306	0.356525	-0.0896696	0.289734	-0.883136	0.0357765	-0.180547	0.00146939	-0.331773	-0.126455	-0.037235	-0.23968	0	Mitochondrial import inner membrane translocase subunit TIM44	0.030571	-0.256609	0.18348	0.214168	0.348701	0	0	0.28718	1	0		Q62426	Cystatin-B	-0.291398	0.528677	0.459432	0.597976	-0.729076	0.175941	-0.0169061	0.404936	-0.282649	-0.0944027	-0.323173	-0.0747753
Q00898	Alpha-1-antitrypsin 1-5	no	-0.121002	0.384623	1.17603	-0.417001	-0.690228	-0.213162	0.552077	-0.41725	-0.620595	-0.513759	-0.575117	0.0987311	0	Alpha-1-antitrypsin 1-5	0.255662	-0.192141	0.348575	0.266625	0.349476	0	0	0.447803	1	0		P23953	Carboxylesterase 1C	0.0219061	0.556775	1.72513	-0.108759	-0.536168	-0.0729976	0.715718	-0.0137839	-0.571472	-0.481707	-0.861054	0.263635
Q8K183	Pyridoxal kinase	no	0.257848	0.853143	0.80907	0.199874	0.146474	0.695641	0.196555	0.196171	-0.211568	0.0785786	-0.445628	0.205818	0	Pyridoxal kinase	0.529984	0.30871	0.174488	0.129512	0.350962	0	0	0.221273	1	0		Q9R0Y5	Adenylate kinase isoenzyme 1	0.400757	1.0253	1.35817	0.508116	0.300534	0.835806	0.360196	0.599637	-0.162444	0.110631	-0.731566	0.370722
P61202	COP9 signalosome complex subunit 2	no	-0.191082	0.523127	-0.525065	0.343412	0.147762	0.815176	-0.174734	0.7263	0.267949	0.00919111	0.18031	0.500125	0	COP9 signalosome complex subunit 2	0.0375979	0.378626	0.241203	0.23646	0.351655	0	0	-0.341028	0	1	Q6P3Z7	B7ZCI2	Nebulette	-0.0481735	0.695279	0.024036	0.651654	0.301822	0.95534	-0.0110936	1.12977	0.317072	0.041243	-0.105628	0.665029
Q91YT0	NADH dehydrogenase [ubiquinone] flavoprotein 1, mitochondrial	no	0.150227	-0.0871451	-0.330134	0.310386	0.747821	0.0416722	-0.172207	0.43918	0.502762	-0.0138451	0.275905	0.191465	0	NADH dehydrogenase [ubiquinone] flavoprotein 1, mitochondrial	0.0108333	0.264116	0.139947	0.205036	0.351904	0	0	-0.253283	0	1		Q8R3B1	1-phosphatidylinositol 4,5-bisphosphate phosphodiesterase delta-1	0.293135	0.0850069	0.218967	0.618628	0.901881	0.181837	-0.00856613	0.842646	0.551885	0.0182068	-0.0100327	0.356369
P60766	Cell division control protein 42 homolog	no		2.11895	1.03673	1.25095		1.38916	0.0691426	1.25107		-0.284278	-0.995168	0.0539388	0	Cell division control protein 42 homolog	1.46888	0.903123	0.330866	0.418891	0.351928	0	0	0.565753	1	0		Q8BGK2	[Protein ADP-ribosylarginine] hydrolase-like protein 1		2.2911	1.58583	1.5592		1.52932	0.232784	1.65454		-0.252226	-1.28111	0.218843
Q78IK2	Up-regulated during skeletal muscle growth protein 5	no	-0.260414		1.24025	1.07401	1.6981		0.745556	1.40194	1.79144		-0.191665	0.25862	0	Up-regulated during skeletal muscle growth protein 5	0.684616	1.28187	0.474946	0.281454	0.352981	1	1	-0.597251	0	1		Q8VE38	Oxidoreductase NAD-binding domain-containing protein 1	-0.117506		1.78935	1.38225	1.85216		0.909197	1.80541	1.84056		-0.477603	0.423524
Q4VAA2	Protein CDV3	no	-0.122851	-1.07981	-2.06059	-0.804551	-0.171126	-1.05664	0.371118	-1.06868	0.109343	0.0791131	2.56547	-0.0916325	0	Protein CDV3	-1.01695	-0.481332	0.401835	0.353418	0.356121	0	0	-0.535618	0	1		E9QLA0	Mitochondrial inner membrane protein	0.0200577	-0.90766	-1.51148	-0.496309	-0.0170666	-0.916477	0.534759	-0.665211	0.158466	0.111165	2.27953	0.0732718
Q8K1Z0	Ubiquinone biosynthesis protein COQ9, mitochondrial	no	-0.301644	-1.25941	-0.757712	-0.536106	-0.925038	-1.65148	-0.56621	-0.932438	-0.781096	-0.355442	0.231561	-0.309935	0	Ubiquinone biosynthesis protein COQ9, mitochondrial	-0.713718	-1.01879	0.204342	0.227554	0.357457	0	0	0.305073	1	0		D3YZD8	UPF0366 protein C11orf67 homolog	-0.158735	-1.08726	-0.208611	-0.227864	-0.770978	-1.51132	-0.402569	-0.528971	-0.731973	-0.32339	-0.0543773	-0.145031
Q9WTX5	S-phase kinase-associated protein 1	no	-0.116604	-1.04439	-0.320006	-0.683532	-0.0678194	-0.554841	0.131847	-0.591614	0.15414	0.300112	0.413967	0.426871	0	S-phase kinase-associated protein 1	-0.541133	-0.270607	0.204668	0.179566	0.359411	0	0	-0.270526	0	1		Q9CQ60	6-phosphogluconolactonase	0.0263043	-0.872238	0.229096	-0.37529	0.0862402	-0.414677	0.295488	-0.188148	0.203264	0.332164	0.128029	0.591775
P01027	Complement C3;Complement C3 beta chain;Complement C3 alpha chain;C3a anaphylatoxin;Complement C3b alpha chain;Complement C3c alpha chain fragment 1;Complement C3dg fragment;Complement C3g fragment;Complement C3d fragment;Complement C3f fragment;Complement C3c alpha chain fragment 2	no	-0.0920235	1.36084	1.1872	0.81315	0.287742	0.819434	0.555849	0.14019	0.451678	-0.675435	-0.633677	-0.688201	0	Complement C3;Complement C3 beta chain;Complement C3 alpha chain;C3a anaphylatoxin;Complement C3b alpha chain;Complement C3c alpha chain fragment 1;Complement C3dg fragment;Complement C3g fragment;Complement C3d fragment;Complement C3f fragment;Complement C3c alpha chain fragment 2	0.817292	0.450804	0.323928	0.149998	0.359664	0	0	0.366488	1	0		P11531	Dystrophin	0.0508847	1.53299	1.7363	1.12139	0.441802	0.959599	0.71949	0.543656	0.500802	-0.643383	-0.919615	-0.523297
E9QKG5	Protein PRRC2C	no	-1.6417		-0.0605862	-1.11155	-3.45565		-1.44973	-0.833216	-1.76926		-1.41105	0.287797	0	Protein PRRC2C	-0.937945	-1.91287	0.464609	0.791655	0.361035	1	1	0.97492	1	0	Q9D154	A2AMM0	Muscle-related coiled-coil protein	-1.49879		0.488515	-0.80331	-3.30159		-1.28609	-0.42975	-1.72014		-1.69698	0.452701
B7ZMP8	Muscular LMNA-interacting protein	no	-1.59087	-0.358653		1.44502	-1.10613	-1.4789		-1.02283	0.58547	-0.95604		-2.40911	0	Muscular LMNA-interacting protein	-0.168165	-1.20262	0.881545	0.140218	0.361237	1	1	1.03446	1	0	Q99LB4	Q9CX34	Suppressor of G2 allele of SKP1 homolog	-1.44796	-0.186501		1.75326	-0.952071	-1.33874		-0.619366	0.634593	-0.923988		-2.24421
Q91XE4	Aspartoacylase-2	no	-0.390125	0.195505	-0.930036	-0.180732	-0.561462	-0.180566	-0.591159	-1.23931	-0.27565	-0.416805	0.38166	-0.755541	0	Aspartoacylase-2	-0.326347	-0.643124	0.234883	0.219614	0.362769	0	0	0.316777	1	0		Q9CX80	Cytoglobin	-0.247217	0.367657	-0.380935	0.12751	-0.407402	-0.0404014	-0.427518	-0.835843	-0.226527	-0.384753	0.095722	-0.590636
P01873	Ig mu chain C region membrane-bound form;Ig mu chain C region secreted form	no	1.10228	0.70901	2.50602	0.000563168	0.227556	0.344749	0.470766	0.973978	-0.928639	-0.373845	-2.07793	0.863453	0	Ig mu chain C region membrane-bound form;Ig mu chain C region secreted form	1.07947	0.504262	0.527325	0.164257	0.362877	1	1	0.575208	1	0		Q8BMF4	Dihydrolipoyllysine-residue acetyltransferase component of pyruvate dehydrogenase complex, mitochondrial	1.24519	0.881162	3.05513	0.308805	0.381616	0.484913	0.634407	1.37744	-0.879515	-0.341793	-2.36387	1.02836
P38060	Hydroxymethylglutaryl-CoA lyase, mitochondrial	no	-0.185633	-0.02862	-0.492934	-0.537338	0.569455	-0.202977	0.00500105	-0.54947	0.658401	-0.107526	0.484683	0.0842377	0	Hydroxymethylglutaryl-CoA lyase, mitochondrial	-0.311131	-0.0444976	0.122401	0.234432	0.364212	0	0	-0.266633	0	1	P16015	E9QNX3	Eukaryotic translation initiation factor 4 gamma 3	-0.0427242	0.143532	0.0561673	-0.229096	0.723515	-0.0628125	0.168642	-0.146004	0.707525	-0.0754744	0.198745	0.249142
Q6IRU2	Tropomyosin alpha-4 chain	no	0.658582	-0.387396	1.50109	-0.00573133	-0.265583	-0.206012	0.118146	0.318454	-0.879532	0.237101	-1.24309	0.37413	0	Tropomyosin alpha-4 chain	0.441635	-0.00874885	0.414018	0.137853	0.365372	0	0	0.450384	1	0		Q61937	Nucleophosmin	0.80149	-0.215244	2.05019	0.302511	-0.111524	-0.065848	0.281787	0.72192	-0.830408	0.269153	-1.52903	0.539035
P15116	Cadherin-2	no	1.23399		0.90497	-0.421142	0.379603		0.198015	-0.78342	-0.923155		-0.632695	-0.153265	0	Cadherin-2	0.572607	-0.0686005	0.505871	0.361233	0.366235	1	1	0.641208	1	0		Q9CY64	Biliverdin reductase A	1.3769		1.45407	-0.1129	0.533663		0.361656	-0.379954	-0.874031		-0.918633	0.0116388
B2RPU8	Coiled-coil-helix-coiled-coil-helix domain-containing protein 2, mitochondrial	no	-0.230044	-0.789545	-0.288714	-0.779794	0.366488	-1.00545	-0.00828025	-0.126544	0.778045	-0.231738	0.309974	0.499214	0	Coiled-coil-helix-coiled-coil-helix domain-containing protein 2, mitochondrial	-0.522024	-0.193446	0.152123	0.29035	0.366626	0	0	-0.328578	0	1		Q924X2	Carnitine O-palmitoyltransferase 1, muscle isoform	-0.0871356	-0.617393	0.260387	-0.471552	0.520548	-0.865285	0.155361	0.276922	0.827169	-0.199686	0.024036	0.664119
Q6PB66	Leucine-rich PPR motif-containing protein, mitochondrial	no	0.0378761	0.77571	-0.738173	0.673636	0.725019	0.34938	0.187761	1.08153	0.674391	-0.411015	0.814409	0.362166	0	Leucine-rich PPR motif-containing protein, mitochondrial	0.187263	0.585922	0.348996	0.199887	0.369088	0	0	-0.398659	0	1		Q9Z1P6	NADH dehydrogenase [ubiquinone] 1 alpha subcomplex subunit 7	0.180784	0.947862	-0.189072	0.981879	0.879078	0.489544	0.351402	1.48499	0.723515	-0.378963	0.528471	0.52707
Q9QZV4	0	no	-0.710291	-1.58065	-1.22043	-0.661791	-0.99549	-1.36186	-0.298688	-0.0649422	-0.460818	0.172339	0.946319	0.362066	0	0	-1.04329	-0.680244	0.219195	0.301131	0.370722	0	0	-0.363044	0	1		P00493	Hypoxanthine-guanine phosphoribosyltransferase	-0.567383	-1.40849	-0.671324	-0.353549	-0.84143	-1.22169	-0.135047	0.338524	-0.411694	0.204391	0.660381	0.52697
P45591	Cofilin-2	no	-0.21056	-1.08342	-0.716851	-0.500941	-0.599893	-0.667735	-0.145149	-0.218615	-0.246674	0.563834	0.46863	0.234322	0	Cofilin-2	-0.627944	-0.407848	0.183871	0.132049	0.372112	0	0	-0.220095	0	1		Q9R0Q6	Actin-related protein 2/3 complex subunit 1A	-0.0676515	-0.91127	-0.16775	-0.192699	-0.445834	-0.527571	0.0184917	0.184851	-0.19755	0.595885	0.182692	0.399226
P62192	26S protease regulatory subunit 4	no	-0.628912	0.665328	0.68834	0.94901	0.682268	1.10777	0.912508	0.501244	1.3548	0.36345	0.464302	-0.318463	0	26S protease regulatory subunit 4	0.418441	0.800948	0.354994	0.132443	0.372332	0	0	-0.382507	0	1		P28654	Decorin	-0.486004	0.83748	1.23744	1.25725	0.836328	1.24794	1.07615	0.90471	1.40392	0.395502	0.178364	-0.153559
Q99L45	Eukaryotic translation initiation factor 2 subunit 2	no	-0.881606		-0.814602	-0.691407	-1.03655		-0.0622597	-0.284395	-0.234762		0.535323	0.538374	0	Eukaryotic translation initiation factor 2 subunit 2	-0.795872	-0.461068	0.0556986	0.2948	0.373893	0	0	-0.334803	0	1		Q99LB2	Dehydrogenase/reductase SDR family member 4	-0.738698		-0.265501	-0.383165	-0.882491		0.101381	0.119072	-0.185638		0.249385	0.703278
Q8BG32	26S proteasome non-ATPase regulatory subunit 11	no	-0.231301	0.39094	-0.325679	0.539795	0.514241	0.854277	-0.32707	0.632764	0.731439	0.281542	-0.312388	0.0224834	0	26S proteasome non-ATPase regulatory subunit 11	0.0934388	0.418553	0.217726	0.258336	0.374076	0	0	-0.325114	0	1		Q3TXS7	26S proteasome non-ATPase regulatory subunit 1	-0.0883928	0.563092	0.223423	0.848037	0.668301	0.994442	-0.16343	1.03623	0.780562	0.313594	-0.598326	0.187388
P62071	Ras-related protein R-Ras2	no	-0.00934475	0.287305	0.306171	0.170607	-0.497188	0.553037	-0.109001	-0.117531	-0.367198	0.341457	-0.568293	-0.277956	0	Ras-related protein R-Ras2	0.188684	-0.0426709	0.0724979	0.218223	0.376258	0	0	0.231355	1	0		Q02053	Ubiquitin-like modifier-activating enzyme 1	0.133564	0.459457	0.855272	0.478849	-0.343128	0.693201	0.0546401	0.285935	-0.318074	0.373509	-0.854231	-0.113052
Q9D051	Pyruvate dehydrogenase E1 component subunit beta, mitochondrial	no	-0.0385716	0.607543	-0.166157	-0.138254	1.01291	0.467782	-0.00297885	-0.0364603	1.0249	-0.101973	0.177217	0.106521	0	Pyruvate dehydrogenase E1 component subunit beta, mitochondrial	0.06614	0.360314	0.182533	0.246111	0.377073	0	0	-0.294174	0	1		P99029	Peroxiredoxin-5, mitochondrial	0.104337	0.779695	0.382944	0.169988	1.16697	0.607946	0.160662	0.367006	1.07403	-0.0699212	-0.108721	0.271426
O35215	D-dopachrome decarboxylase	no	-0.401264	-0.662106	-0.438872	-0.787162	-0.977303	-1.14865	-0.061722	-1.24946	-0.502148	-0.602859	0.278779	-0.544337	0	D-dopachrome decarboxylase	-0.572351	-0.859284	0.0918727	0.271723	0.378347	0	0	0.286933	1	0		Q9CX56	26S proteasome non-ATPase regulatory subunit 8	-0.258356	-0.489954	0.110229	-0.47892	-0.823243	-1.00849	0.101919	-0.845992	-0.453024	-0.570807	-0.00715906	-0.379432
Q8CJ53	Cdc42-interacting protein 4	no	0.335391		0.335301	0.369668	0.475787		-0.245774	0.115173	-0.114237		-0.427394	-0.190463	0	Cdc42-interacting protein 4	0.346787	0.115062	0.0114408	0.208297	0.381714	0	0	0.231725	1	0		P62814	V-type proton ATPase subunit B, brain isoform	0.478299		0.884402	0.67791	0.629846		-0.0821329	0.518639	-0.0651137		-0.713332	-0.0255588
D3YU59	LIM and calponin homology domains-containing protein 1	no	-0.48187	-1.21927		-1.29352	-0.217785	-0.740624		-1.01275	0.504925	0.437		0.422653	0	LIM and calponin homology domains-containing protein 1	-0.998222	-0.657053	0.259064	0.233259	0.383717	0	0	-0.341169	0	1		Q9JLZ3	Methylglutaconyl-CoA hydratase, mitochondrial	-0.338962	-1.04712		-0.985282	-0.0637258	-0.60046		-0.609282	0.554049	0.469052		0.587557
Q9JMA1	Ubiquitin carboxyl-terminal hydrolase 14;Ubiquitin carboxyl-terminal hydrolase	no	-0.240163	-0.446921	-0.320744	-0.464121	-0.212473	-0.0462853	-0.166587	-0.566965	-0.0560362	0.214174	0.0815885	-0.212586	0	Ubiquitin carboxyl-terminal hydrolase 14;Ubiquitin carboxyl-terminal hydrolase	-0.367987	-0.248077	0.0532627	0.111922	0.384628	0	0	-0.11991	0	1		Q8C5H8	NAD kinase domain-containing protein 1	-0.097255	-0.274769	0.228357	-0.155879	-0.0584129	0.0938791	-0.00294614	-0.163499	-0.00691261	0.246226	-0.204349	-0.0476813
P23953	Carboxylesterase 1C	no	0.269169	-0.669279	0.774211	-0.3904	-0.267798	-1.06358	0.351062	-0.706458	-0.42595	-0.269099	-0.36214	-0.375868	0	Carboxylesterase 1C	-0.00407477	-0.421693	0.325594	0.304678	0.385292	0	0	0.417619	1	0		Q91V64	Isochorismatase domain-containing protein 1	0.412077	-0.497127	1.32331	-0.0821575	-0.113739	-0.923415	0.514703	-0.302992	-0.376826	-0.237047	-0.648078	-0.210963
P47857	6-phosphofructokinase, muscle type	no	-0.402576	0.316238	-1.81642	0.834143	-0.721977	1.04564	-0.138045	1.75027	-0.310485	0.698349	1.76512	0.931695	0	6-phosphofructokinase, muscle type	-0.267155	0.483971	0.57531	0.559776	0.385545	1	1	-0.751126	0	1		Q9JK53	Prolargin	-0.259668	0.48839	-1.26732	1.14238	-0.567917	1.1858	0.0255958	2.15374	-0.261362	0.730401	1.47918	1.0966
A6ZI44	Fructose-bisphosphate aldolase;Fructose-bisphosphate aldolase A	no	-0.454397	0.0192075	-0.593104	-0.25067	-0.305117	-0.0197447	-0.0139913	-0.337386	0.120032	0.108596	0.590916	-0.0837011	0	Fructose-bisphosphate aldolase;Fructose-bisphosphate aldolase A	-0.319741	-0.16906	0.133078	0.0881224	0.386855	0	0	-0.150681	0	1		P08113	Endoplasmin	-0.311488	0.19136	-0.0440029	0.0575719	-0.151058	0.12042	0.14965	0.0660799	0.169155	0.140648	0.304978	0.0812032
O70433	Four and a half LIM domains protein 2	no	0.91319	0.644546	0.166089	-0.977087	1.15849	0.191045	1.14373	0.154201	0.190885	-0.449188	1.06154	1.11528	0	Four and a half LIM domains protein 2	0.186684	0.661866	0.417556	0.282581	0.38711	0	0	-0.475182	0	1		Q9JJU8	SH3 domain-binding glutamic acid-rich-like protein	1.0561	0.816698	0.71519	-0.668845	1.31255	0.331209	1.30737	0.557667	0.240009	-0.417136	0.775598	1.28018
Q8WTY4	Anamorsin	no	-0.470492	-1.38572	-0.816702	-1.38069	-0.00949113	-1.37473	0.128434	-1.11751	0.290584	0.155716	0.497947	0.259265	0	Anamorsin	-1.0134	-0.593325	0.2249	0.381572	0.38765	0	0	-0.420076	0	1		Q99PT1	Rho GDP-dissociation inhibitor 1	-0.327584	-1.21357	-0.267601	-1.07245	0.144568	-1.23456	0.292075	-0.714048	0.339707	0.187768	0.212009	0.42417
Q01730	Ras suppressor protein 1	no	0.226363	0.819504	0.387414	1.14389	-0.397053	0.93776	-0.3836	0.818056	-0.668549	0.0260567	-0.975182	-0.341416	0	Ras suppressor protein 1	0.644294	0.243791	0.208357	0.366932	0.388274	0	0	0.400503	1	0		Q91VA7		0.369271	0.991657	0.936515	1.45214	-0.242994	1.07792	-0.219959	1.22152	-0.619426	0.0581087	-1.26112	-0.176511
Q9D7J9	Enoyl-CoA hydratase domain-containing protein 3, mitochondrial	no	-0.582761	0.234485	-0.956407	-0.0158729	-0.810777	-0.127325	-0.554737	-1.09268	-0.0848802	-0.164582	0.376385	-0.797712	0	Enoyl-CoA hydratase domain-containing protein 3, mitochondrial	-0.330139	-0.646379	0.269814	0.204944	0.389131	0	0	0.31624	1	0		P47857	6-phosphofructokinase, muscle type	-0.439852	0.406637	-0.407306	0.292369	-0.656717	0.0128392	-0.391096	-0.68921	-0.0357566	-0.13253	0.090447	-0.632808
Q922B2	Aspartate--tRNA ligase, cytoplasmic	no	0.157508	0.981006	0.431582	0.450333	0.537743	0.916057	0.459008	0.888691	0.389169	-0.23469	0.0625472	0.357654	0	Aspartate--tRNA ligase, cytoplasmic	0.505107	0.700375	0.17217	0.117859	0.389951	0	0	-0.195267	0	1	F8WJE0	P83940	Transcription elongation factor B polypeptide 1	0.300417	1.15316	0.980683	0.758575	0.691802	1.05622	0.622649	1.29216	0.438293	-0.202638	-0.223391	0.522558
P16675	Lysosomal protective protein;Lysosomal protective protein 32 kDa chain;Lysosomal protective protein 20 kDa chain	no	0.618717	0.884849	0.760075	0.678517	0.576689	1.10589	0.722948	1.09369	-0.010266	0.308339	-0.128119	0.25991	0	Lysosomal protective protein;Lysosomal protective protein 32 kDa chain;Lysosomal protective protein 20 kDa chain	0.73554	0.874805	0.0575863	0.133306	0.390828	0	0	-0.139265	0	1	Q60931	P97449	Aminopeptidase N	0.761626	1.057	1.30918	0.986759	0.730749	1.24605	0.886589	1.49716	0.0388575	0.340391	-0.414057	0.424815
P70697	Uroporphyrinogen decarboxylase	no	0.422104		-0.000171442	0.800525	0.355586		-0.448468	0.30918	0.13395		-0.125871	-0.340894	0	Uroporphyrinogen decarboxylase	0.407486	0.0720991	0.231257	0.260628	0.390998	0	0	0.335387	1	0		Q3U367	4-trimethylaminobutyraldehyde dehydrogenase	0.565012		0.54893	1.10877	0.509645		-0.284827	0.712646	0.183074		-0.411809	-0.17599
Q3UER8	Fibrinogen gamma chain	no	-0.465648	1.79747	0.730073	1.08121	-0.422842	0.458205	0.565977	0.53959	-0.00633918	-1.40916	-0.446107	-0.581096	0	Fibrinogen gamma chain	0.785776	0.285233	0.472579	0.237136	0.392624	0	0	0.500543	1	0		E0CYV0	Protein-L-isoaspartate O-methyltransferase;Protein-L-isoaspartate(D-aspartate) O-methyltransferase	-0.32274	1.96962	1.27917	1.38945	-0.268782	0.598369	0.729618	0.943056	0.0427844	-1.37711	-0.732045	-0.416192
Q14BI5	0	no	0.150109	-0.270572	-0.847348	-0.934915	-1.4575	-0.29371	-0.485785	-1.01417	-1.60107	0.0484693	0.335569	-0.155987	0	0	-0.475681	-0.812789	0.255394	0.263403	0.393655	0	0	0.337108	1	0		Q91UZ5	Inositol monophosphatase 2	0.293017	-0.0984196	-0.298247	-0.626673	-1.30344	-0.153546	-0.322145	-0.6107	-1.55194	0.0805212	0.0496307	0.00891703
Q9CQ92	Mitochondrial fission 1 protein	no	-0.41866	-0.373284		-0.0570124	-0.779838	-0.534459		-0.159208	-0.396816	-0.039037		-0.0739154	0	Mitochondrial fission 1 protein	-0.282985	-0.491169	0.113743	0.180463	0.393796	0	0	0.208183	1	0		P97443	SET and MYND domain-containing protein 1	-0.275751	-0.201132		0.25123	-0.625779	-0.394295		0.244258	-0.347693	-0.0069851		0.0909888
Q6P8I4	PEST proteolytic signal-containing nuclear protein	no	-0.396011	-1.72049		-1.09843	0.147294	-0.982701		-0.878551	0.638922	0.766621		0.376214	0	PEST proteolytic signal-containing nuclear protein	-1.07164	-0.571319	0.382579	0.360562	0.395312	0	0	-0.500324	0	1		Q4VAA2	Protein CDV3	-0.253103	-1.54834		-0.790188	0.301354	-0.842536		-0.475085	0.688046	0.798673		0.541118
Q91VM9	Inorganic pyrophosphatase 2, mitochondrial	no	-0.5242	-0.486907	-0.959031	-0.976361	-0.162887	-0.536872	-0.462189	-0.990831	0.379341	-0.136268	0.615349	0.0776677	0	Inorganic pyrophosphatase 2, mitochondrial	-0.736625	-0.538195	0.133673	0.171152	0.398068	0	0	-0.19843	0	1		Q91V77	Protein S100-A1	-0.381291	-0.314755	-0.40993	-0.668119	-0.00882739	-0.396707	-0.298548	-0.587365	0.428464	-0.104217	0.329411	0.242572
B7ZCI2	Nebulette	no	-1.61868	-0.996553	-0.107405	-1.0899	-0.0331769	-0.663425	-0.943856	-0.80466	1.55253	0.394911	-0.927867	0.393167	0	Nebulette	-0.953135	-0.61128	0.313422	0.201023	0.399818	0	0	-0.341855	0	1		Q7TQ48	Sarcalumenin	-1.47578	-0.824401	0.441696	-0.781654	0.120883	-0.523261	-0.780215	-0.401194	1.60165	0.426963	-1.21381	0.558072
Q9D0M5	Dynein light chain 2, cytoplasmic;Dynein light chain 1, cytoplasmic	no	-0.477024	-0.672342	-0.729613	-0.925353	-0.495688	-0.840249	0.129141	-0.717409	-0.0580961	-0.342216	0.707848	0.200676	0	Dynein light chain 2, cytoplasmic;Dynein light chain 1, cytoplasmic	-0.701083	-0.481051	0.0922583	0.21553	0.400337	0	0	-0.220032	0	1		P63101	14-3-3 protein zeta/delta	-0.334116	-0.50019	-0.180512	-0.61711	-0.341629	-0.700085	0.292782	-0.313942	-0.00897258	-0.310164	0.42191	0.365581
P08113	Endoplasmin	no	0.778223	0.155142	1.55006	0.405184	0.466527	0.0411814	0.452999	0.682398	-0.278574	-0.128011	-1.14621	0.248148	0	Endoplasmin	0.722152	0.410776	0.304212	0.133937	0.400457	0	0	0.311376	1	0		Q8K3A0	Iron-sulfur cluster co-chaperone protein HscB, mitochondrial	0.921132	0.327294	2.09916	0.713426	0.620587	0.181346	0.61664	1.08586	-0.22945	-0.0959591	-1.43214	0.413052
Q9Z2I9	Succinyl-CoA ligase [ADP-forming] subunit beta, mitochondrial	no	-0.209351	-0.123039	-1.17557	1.53089	-0.33737	-0.528519	0.0623743	-1.61554	-0.1056	-0.34569	1.25819	-3.2291	0	Succinyl-CoA ligase [ADP-forming] subunit beta, mitochondrial	0.00573241	-0.604763	0.561577	0.358707	0.400839	1	1	0.610495	1	0		P14211	Calreticulin	-0.0664424	0.0491135	-0.626469	1.83913	-0.18331	-0.388355	0.226015	-1.21207	-0.0564762	-0.313638	0.972252	-3.06419
F6ZR71	NHL repeat-containing protein 2	no	-0.492695	0.121702		-0.814844	-0.473537	-0.543105		-1.16245	0.00426594	-0.286341		-0.283443	0	NHL repeat-containing protein 2	-0.395279	-0.726365	0.27471	0.218966	0.401785	0	0	0.331085	1	0		P24549	Retinal dehydrogenase 1	-0.349787	0.293854		-0.506602	-0.319478	-0.40294		-0.758985	0.0533895	-0.254289		-0.118539
P70404	Isocitrate dehydrogenase [NAD] subunit gamma 1, mitochondrial	no	0.360033	1.19413	-0.211333	0.714969	0.00802137	0.401286	-0.256843	0.611762	-0.366928	-0.763737	-0.167224	-0.168747	0	Isocitrate dehydrogenase [NAD] subunit gamma 1, mitochondrial	0.514449	0.191057	0.296195	0.194787	0.402058	0	0	0.323393	1	0		Q9CQ54	NADH dehydrogenase [ubiquinone] 1 subunit C2	0.502942	1.36628	0.337768	1.02321	0.162081	0.54145	-0.0932018	1.01523	-0.317804	-0.731685	-0.453162	-0.00384265
Q62425	NADH dehydrogenase [ubiquinone] 1 alpha subcomplex subunit 4	no	0.259159	0.512143	0.568594	0.880978	1.31806	0.354514	0.440146	1.11317	1.05044	0.0579884	-0.216015	0.404101	0	NADH dehydrogenase [ubiquinone] 1 alpha subcomplex subunit 4	0.555218	0.806473	0.127738	0.240529	0.402342	0	0	-0.251255	0	1		Q9QYG0	Protein NDRG2	0.402067	0.684295	1.1177	1.18922	1.47212	0.494678	0.603787	1.51664	1.09956	0.0900404	-0.501953	0.569005
Q9R0Q6	Actin-related protein 2/3 complex subunit 1A	no	0.0472641	1.16213	-0.521381	1.07807	0.327963	1.33421	0.518393	1.37314	0.337687	0.254356	0.911489	0.195966	0	Actin-related protein 2/3 complex subunit 1A	0.441521	0.888425	0.408972	0.271525	0.402745	0	0	-0.446903	0	1		P99026	Proteasome subunit beta type-4	0.190172	1.33428	0.0277203	1.38632	0.482022	1.47437	0.682034	1.7766	0.386811	0.286408	0.625551	0.36087
Q9JK53	Prolargin	no	1.23155	0.848657	-0.63015	1.46392	2.33461	2.19103	-0.918243	2.92861	1.16052	1.07436	-0.629644	0.732181	0	Prolargin	0.728493	1.634	0.470307	0.865597	0.403351	1	1	-0.905508	0	1		B8JJN0	Complement factor B;Complement factor B Ba fragment;Complement factor B Bb fragment	1.37445	1.02081	-0.081049	1.77216	2.48867	2.33119	-0.754602	3.33208	1.20964	1.10641	-0.915582	0.897085
P28650	Adenylosuccinate synthetase isozyme 1	no	-0.161085	0.288515	-0.663855	0.568568	-0.00194113	0.372679	0.450079	0.290528	0.103384	0.0118525	1.03817	-0.278346	0	Adenylosuccinate synthetase isozyme 1	0.00803601	0.277836	0.269707	0.0987839	0.403473	0	0	-0.2698	0	1		Q9D7X8	Gamma-glutamylcyclotransferase	-0.0181766	0.460668	-0.114754	0.876811	0.152118	0.512843	0.61372	0.693994	0.152508	0.0439044	0.752235	-0.113442
Q3URE1	Acyl-CoA synthetase family member 3, mitochondrial	no	-0.225927	0.551744	-0.589806	0.801802	-0.458476	0.0763706	-0.158313	-0.214033	-0.162019	-0.109245	0.659336	-0.87592	0	Acyl-CoA synthetase family member 3, mitochondrial	0.134453	-0.188613	0.325821	0.109775	0.404993	0	0	0.323066	1	0		P97315	Cysteine and glycine-rich protein 1	-0.083019	0.723896	-0.0407046	1.11004	-0.304416	0.216535	0.00532815	0.189434	-0.112896	-0.0771932	0.373398	-0.711016
F6ZM12	Acyl-CoA-binding protein	no	-0.411847	-1.44334	-0.0858973	-1.0867	-0.860807	-1.99906	-0.38651	-1.45804	-0.27248	-0.38081	-0.373101	-0.231966	0	Acyl-CoA-binding protein	-0.756947	-1.1761	0.309472	0.351143	0.405516	0	0	0.419157	1	0		P97493	Thioredoxin, mitochondrial	-0.268938	-1.27119	0.463204	-0.778461	-0.706747	-1.8589	-0.222869	-1.05457	-0.223357	-0.348758	-0.659039	-0.067062
P31428	Dipeptidase 1	no		-0.648378	0.301218	-0.0577163		-0.781803	-0.0958646	-0.487667		-0.155156	-0.445819	-0.57223	0	Dipeptidase 1	-0.134959	-0.455111	0.276832	0.198681	0.405681	0	0	0.320152	1	0		Q9WUM5	Succinyl-CoA ligase [ADP/GDP-forming] subunit alpha, mitochondrial		-0.476226	0.850319	0.250526		-0.641639	0.0677764	-0.0842003		-0.123104	-0.731757	-0.407325
Q9CQ75	NADH dehydrogenase [ubiquinone] 1 alpha subcomplex subunit 2	no	0.183399	0.913222	0.0774781	0.711513	1.23936	0.6577	0.258484	0.746583	0.993731	-0.106721	0.0263215	-0.0445523	0	NADH dehydrogenase [ubiquinone] 1 alpha subcomplex subunit 2	0.471403	0.725531	0.202275	0.201493	0.407687	0	0	-0.254128	0	1		Q80YD1	ATP-dependent RNA helicase SUPV3L1, mitochondrial	0.326307	1.08537	0.626579	1.01975	1.39342	0.797864	0.422125	1.15005	1.04286	-0.0746689	-0.259616	0.120352
Q8K0E8	Fibrinogen beta chain;Fibrinopeptide B;Fibrinogen beta chain	no	-0.392199	1.42539	0.614462	1.24654	-0.284804	0.334107	0.19453	0.920014	0.179233	-1.31053	-0.42763	-0.776285	0	Fibrinogen beta chain;Fibrinopeptide B;Fibrinogen beta chain	0.723548	0.290962	0.410578	0.248055	0.409037	0	0	0.432586	1	0		P29595	NEDD8	-0.249291	1.59754	1.16356	1.55478	-0.130745	0.474272	0.358171	1.32348	0.228357	-1.27848	-0.713568	-0.611381
Q9D8N0	Elongation factor 1-gamma	no	-0.186792	0.411938	0.288196	-0.0168972	-0.0366305	0.690988	0.200483	0.372098	0.154641	0.287103	-0.0507266	0.250746	0	Elongation factor 1-gamma	0.124111	0.306735	0.137329	0.153056	0.409057	0	0	-0.182624	0	1		P22599	Alpha-1-antitrypsin 1-2	-0.0438838	0.58409	0.837297	0.291345	0.117429	0.831153	0.364124	0.775565	0.203765	0.319155	-0.336664	0.41565
F8WH86	Transcription elongation factor B polypeptide 2	no	-0.17939	-0.672036	-0.242606	-1.05154	0.17581	-0.802461	0.162781	-0.546337	0.148993	0.126027	0.247369	-0.0601651	0	Transcription elongation factor B polypeptide 2	-0.536393	-0.252552	0.203621	0.249116	0.412903	0	0	-0.283842	0	1		D3YVN7	Elongation factor Tu;Elongation factor Tu, mitochondrial	-0.0364815	-0.499884	0.306496	-0.7433	0.32987	-0.662297	0.326422	-0.142871	0.198117	0.158079	-0.0385693	0.104739
E9Q3X0	Major vault protein	no		1.03935	1.20065	0.893699		2.06115	0.463966	2.53121		1.13531	-0.541523	1.65933	0	Major vault protein	1.04456	1.68544	0.0886469	0.62563	0.413669	1	1	-0.640877	0	1		Q9CR16	Peptidyl-prolyl cis-trans isomerase D		1.2115	1.74975	1.20194		2.20131	0.627607	2.93468		1.16736	-0.827461	1.82424
Q9DCZ1	GMP reductase 1	no	-0.0383033	0.11417	-0.416064	0.0782263	-0.412657	0.955132	-0.109696	0.511599	-0.382512	0.644757	0.368095	0.392775	0	GMP reductase 1	-0.0654928	0.236094	0.121303	0.307323	0.414059	0	0	-0.301587	0	1		P17742	Peptidyl-prolyl cis-trans isomerase A;Peptidyl-prolyl cis-trans isomerase	0.104605	0.286322	0.133037	0.386468	-0.258598	1.0953	0.0539454	0.915065	-0.333389	0.676809	0.0821575	0.55768
P35235	Tyrosine-protein phosphatase non-receptor type 11	no	-0.548914	0.287087	-0.561329	-0.80986	-0.158163	-0.179584	0.0704925	-0.420961	0.461737	0.0978246	0.450209	0.292743	0	Tyrosine-protein phosphatase non-receptor type 11	-0.408254	-0.172054	0.239444	0.100429	0.414164	0	0	-0.2362	0	1		P01837	Ig kappa chain C region	-0.406006	0.459239	-0.0122281	-0.501617	-0.00410306	-0.0394191	0.234133	-0.0174944	0.510861	0.129877	0.164271	0.457647
Q9JLV1	BAG family molecular chaperone regulator 3	no	-1.12733	-1.78625	-0.461367	-1.53801	-0.469205	-1.42266	-0.232639	-1.32734	0.58844	0.476681	0.449308	0.271897	0	BAG family molecular chaperone regulator 3	-1.22824	-0.862961	0.289484	0.300175	0.414802	0	0	-0.365277	0	1		Q922B1	O-acetyl-ADP-ribose deacetylase MACROD1	-0.984417	-1.6141	0.0877344	-1.22977	-0.315145	-1.2825	-0.0689978	-0.923872	0.637564	0.508733	0.16337	0.436802
Q8R4S0	Protein phosphatase 1 regulatory subunit 14C	no	-0.241584	-1.83545	-1.42017	-1.3332	-0.000383926	-1.55538	-0.03271	-1.35311	0.187093	0.260141	1.50118	0.200676	0	Protein phosphatase 1 regulatory subunit 14C	-1.2076	-0.735397	0.340141	0.417129	0.41536	0	0	-0.472205	0	1		Q62059	Versican core protein	-0.0986755	-1.6633	-0.871073	-1.02496	0.153676	-1.41522	0.130931	-0.949647	0.236217	0.292193	1.21524	0.365581
Q8R1C9	Amyloid beta A4 precursor protein-binding family B member 3	no	-0.654928	1.10377	0.0147403		-2.99221	1.27707	-1.76096		-1.45435	0.0166027	-1.7032		0	Amyloid beta A4 precursor protein-binding family B member 3	0.154529	-1.1587	0.512482	1.26869	0.416718	1	1	1.31323	1	0		Q8BWF0	Succinate-semialdehyde dehydrogenase, mitochondrial	-0.51202	1.27593	0.563841		-2.83815	1.41723	-1.59732		-1.40522	0.0486547	-1.98913
A3KMP2	Tetratricopeptide repeat protein 38	no	-0.0229546	0.965337	-0.847153	0.262822	-0.278547	0.179763	-0.57889	-0.441762	-0.254504	-0.41094	0.304999	-0.645201	0	Tetratricopeptide repeat protein 38	0.0895129	-0.279859	0.374955	0.165047	0.416843	0	0	0.369372	1	0		P45591	Cofilin-2	0.119954	1.13749	-0.298052	0.571064	-0.124487	0.319928	-0.415249	-0.0382958	-0.20538	-0.378888	0.0190613	-0.480297
Q921G7	Electron transfer flavoprotein-ubiquinone oxidoreductase, mitochondrial	no	0.347046	0.884489	0.0755145	0.993273	1.21085	0.836197	0.0696337	1.49758	0.670542	0.057175	0.0888011	0.286215	0	Electron transfer flavoprotein-ubiquinone oxidoreductase, mitochondrial	0.57508	0.903564	0.218362	0.309199	0.422419	0	0	-0.328483	0	1	P19324	Q64339	Ubiquitin-like protein ISG15	0.489954	1.05664	0.624616	1.30151	1.36491	0.976361	0.233275	1.90104	0.719665	0.0892269	-0.197137	0.451119
Q9WVE8	Protein kinase C and casein kinase substrate in neurons protein 2	no	-0.143817	-1.32161	-0.732362	-0.113171	-0.6905	-0.774293	0.127019	0.456488	-0.625599	0.360595	1.1296	0.497939	0	Protein kinase C and casein kinase substrate in neurons protein 2	-0.577739	-0.220321	0.285972	0.303681	0.424542	0	0	-0.357418	0	1		Q3UHX2	28 kDa heat- and acid-stable phosphoprotein	-0.000909215	-1.14945	-0.183261	0.195071	-0.53644	-0.634129	0.29066	0.859954	-0.576476	0.392647	0.843662	0.662844
Q3UKW2	Calmodulin;Calmodulin-like protein 3	no	0.320086	-0.976784	0.562331	-0.583964	-0.488303	-0.942399	0.0308244	-0.745224	-0.823552	-0.107496	-0.566599	-0.119182	0	Calmodulin;Calmodulin-like protein 3	-0.169583	-0.536276	0.365007	0.210654	0.425614	0	0	0.366693	1	0		Q9Z1Z2	Serine-threonine kinase receptor-associated protein	0.462995	-0.804632	1.11143	-0.275722	-0.334243	-0.802235	0.194465	-0.341758	-0.774429	-0.075444	-0.852537	0.0457225
Q9CPP6	NADH dehydrogenase [ubiquinone] 1 alpha subcomplex subunit 5	no	-0.075958	-0.929943	0.72674	-0.200299	1.1666	-0.585467	0.569713	0.0838923	1.09336	0.223509	-0.204457	0.122923	0	NADH dehydrogenase [ubiquinone] 1 alpha subcomplex subunit 5	-0.119865	0.308684	0.339284	0.371281	0.427127	0	0	-0.428549	0	1		P61161	Actin-related protein 2	0.0669503	-0.757791	1.27584	0.107943	1.32066	-0.445303	0.733354	0.487358	1.14248	0.255561	-0.490395	0.287827
Q9CXT8	Mitochondrial-processing peptidase subunit beta	no	-0.591003	0.410511	-0.672629	-0.0576477	0.0446859	0.557663	-0.25096	-0.191835	0.520076	0.149242	0.361265	-0.143425	0	Mitochondrial-processing peptidase subunit beta	-0.227692	0.0398884	0.252683	0.184029	0.42781	0	0	-0.267581	0	1		Q8VBT1	Beta-taxilin	-0.448095	0.582663	-0.123528	0.250594	0.198745	0.697827	-0.0873195	0.211632	0.569199	0.181293	0.0753272	0.0214797
Q9DAK9	14 kDa phosphohistidine phosphatase	no	-0.236834	-1.38534	-1.20209	-1.44778	-0.245954	-1.15951	0.230873	-1.44828	0.00468287	-0.0621408	1.28954	0.0483496	0	14 kDa phosphohistidine phosphatase	-1.06801	-0.655718	0.281921	0.391143	0.428444	0	0	-0.412294	0	1		P70349	Histidine triad nucleotide-binding protein 1	-0.0939253	-1.21319	-0.652992	-1.13953	-0.0918942	-1.01935	0.394514	-1.04481	0.0538064	-0.0300888	1.0036	0.213254
Q93092	Transaldolase	no	0.0468846	-0.605859	0.261136	-0.370087	-0.132153	-0.721564	-0.09614	-0.569796	-0.198692	-0.0355764	-0.334907	-0.200336	0	Transaldolase	-0.166981	-0.379913	0.196403	0.156709	0.430777	0	0	0.212932	1	0		Q9CPU0	Lactoylglutathione lyase	0.189793	-0.433707	0.810237	-0.0618453	0.0219061	-0.581399	0.067501	-0.16633	-0.149569	-0.00352444	-0.620845	-0.0354313
P27773	Protein disulfide-isomerase A3	no	0.302077	0.648541	1.17899	0.441815	0.484431	0.973996	0.809125	1.10063	0.17948	0.253291	-0.340308	0.65754	0	Protein disulfide-isomerase A3	0.642857	0.842046	0.192359	0.133307	0.431202	0	0	-0.19919	0	1		Q91VT4	Carbonyl reductase family member 4	0.444985	0.820693	1.72809	0.750057	0.638491	1.11416	0.972766	1.5041	0.228603	0.285343	-0.626246	0.822445
Q9CR16	Peptidyl-prolyl cis-trans isomerase D	no	-0.0206994	-0.0303241	0.268195	-0.199444	-0.43037	0.0724366	0.0416265	-0.17498	-0.126971	0.0701359	0.0131875	0.0461079	0	Peptidyl-prolyl cis-trans isomerase D	0.0044319	-0.122822	0.097029	0.11636	0.434134	0	0	0.127254	1	0		Q61233	Plastin-2	0.122209	0.141828	0.817296	0.108799	-0.27631	0.212601	0.205267	0.228486	-0.0778478	0.102188	-0.27275	0.211012
Q924X2	Carnitine O-palmitoyltransferase 1, muscle isoform	no	0.1602	1.35871	1.00534	1.55762	1.68654	1.33854	0.485469	2.13019	1.71348	0.0468311	-0.508595	0.507385	0	Carnitine O-palmitoyltransferase 1, muscle isoform	1.02047	1.41019	0.308657	0.348212	0.434821	0	0	-0.38972	0	1		P09103	Protein disulfide-isomerase	0.303109	1.53086	1.55444	1.86586	1.8406	1.47871	0.64911	2.53366	1.7626	0.0788831	-0.794532	0.67229
E0CYV0	Protein-L-isoaspartate O-methyltransferase;Protein-L-isoaspartate(D-aspartate) O-methyltransferase	no	-0.45721	0.409928	-0.213961	-0.0278199	-0.405049	0.0687134	-0.185899	-0.525675	-0.0626762	-0.275626	-0.00911928	-0.417336	0	Protein-L-isoaspartate O-methyltransferase;Protein-L-isoaspartate(D-aspartate) O-methyltransferase	-0.0722658	-0.261978	0.1832	0.130751	0.434859	0	0	0.189712	1	0		Q8R086	Sulfite oxidase, mitochondrial	-0.314302	0.58208	0.33514	0.280422	-0.250989	0.208878	-0.0222585	-0.122209	-0.0135527	-0.243574	-0.295057	-0.252432
E9PZD8	Ceruloplasmin	no	0.0611072	0.354903	0.413707	0.487567	0.134594	0.309684	0.220409	0.300411	-0.0732733	-0.00858368	-0.300251	-0.283475	0	Ceruloplasmin	0.329321	0.241274	0.0934326	0.0408177	0.435379	0	0	0.0880465	1	0		Q8K1M6	Dynamin-1-like protein	0.204015	0.527055	0.962808	0.795809	0.288654	0.449848	0.38405	0.703878	-0.0241498	0.0234682	-0.586189	-0.11857
Q8R1G2	Carboxymethylenebutenolidase homolog	no	0.151168	1.01621	-0.362347	0.0295524	-0.261288	0.141608	-0.185533	0.0797118	-0.278946	-0.783493	0.0282028	0.0306953	0	Carboxymethylenebutenolidase homolog	0.208647	-0.0563754	0.290628	0.0984834	0.440422	0	0	0.265022	1	0		Q91YI0	Argininosuccinate lyase	0.294077	1.18836	0.186754	0.337794	-0.107228	0.281772	-0.0218923	0.483178	-0.229822	-0.751441	-0.257735	0.1956
Q9WVJ2	26S proteasome non-ATPase regulatory subunit 13	no	-0.225408	0.0533285	0.305134	-0.000294332	0.331985	0.304059	-0.114428	0.106292	0.568175	0.402296	-0.404513	0.166113	0	26S proteasome non-ATPase regulatory subunit 13	0.0331901	0.156977	0.108916	0.103477	0.441557	0	0	-0.123787	0	1		Q9CWK8	Sorting nexin-2	-0.0824995	0.225481	0.854235	0.307948	0.486045	0.444223	0.0492126	0.509759	0.617298	0.434348	-0.690451	0.331017
Q9CQI6	Coactosin-like protein	no	1.19114	0.311228	2.33305	0.668034	0.688879	0.544014	1.08155	0.601013	-0.486805	0.0548677	-1.5384	-0.135769	0	Coactosin-like protein	1.12586	0.728864	0.441098	0.121278	0.441648	0	0	0.397001	1	0		Q02819	Nucleobindin-1	1.33405	0.48338	2.88215	0.976276	0.842939	0.684179	1.24519	1.00448	-0.437682	0.0869197	-1.82434	0.0291349
O35685	Nuclear migration protein nudC	no	-0.112219	-0.536276	0.241003	-0.298776	-0.411191	-0.522001	0.0859865	-0.601206	-0.341775	-0.331452	-0.0489604	-0.0901248	0	Nuclear migration protein nudC	-0.176567	-0.362103	0.16402	0.154362	0.441699	0	0	0.185536	1	0		O35685	Nuclear migration protein nudC	0.0306892	-0.364124	0.790105	0.00946622	-0.257132	-0.381837	0.249627	-0.19774	-0.292652	-0.299401	-0.334898	0.0747794
P14685	26S proteasome non-ATPase regulatory subunit 3	no	0.0480226	1.07798	0.614462	0.812836	0.87189	1.35916	0.278161	1.08752	0.768827	0.0741625	-0.151353	0.173092	0	26S proteasome non-ATPase regulatory subunit 3	0.638325	0.899181	0.218475	0.229757	0.442182	0	0	-0.260856	0	1		Q99KI0	Aconitate hydratase, mitochondrial	0.190931	1.25013	1.16356	1.12108	1.02595	1.49932	0.441802	1.49098	0.817951	0.106214	-0.437291	0.337996
P97352	Protein S100-A13	no	0.286092	-1.19	1.02553	-0.356339	-0.495195	-1.39246	0.0902274	-0.314414	-0.725719	-0.148744	-1.0201	-0.0172069	0	Protein S100-A13	-0.0586794	-0.52796	0.471069	0.313075	0.443013	0	0	0.469281	1	0		B8JJL8	Programmed cell death 6-interacting protein	0.429	-1.01785	1.57463	-0.0480967	-0.341135	-1.25229	0.253868	0.0890525	-0.676595	-0.116692	-1.30604	0.147697
P57759	Endoplasmic reticulum resident protein 29	no	0.0848328	-0.314761	0.436253	-0.112742	-0.290137	-0.728393	-0.0186809	0.26256	-0.284591	-0.461259	-0.364855	0.429358	0	Endoplasmic reticulum resident protein 29	0.0233958	-0.193663	0.159976	0.210951	0.445817	0	0	0.217058	1	0		Q9QZV4		0.227741	-0.142609	0.985355	0.1955	-0.136077	-0.588229	0.14496	0.666027	-0.235467	-0.429207	-0.650793	0.594262
Q62422	Osteoclast-stimulating factor 1	no	0.9578	0.510011	0.598596	0.0619304	0.17902	0.447195	0.496831	0.336363	-0.460089	0.0592078	-0.203991	0.350808	0	Osteoclast-stimulating factor 1	0.532084	0.364853	0.184208	0.0704414	0.445848	0	0	0.167232	1	0		Q9CQJ6	Density-regulated protein	1.10071	0.682164	1.1477	0.370173	0.33308	0.587359	0.660472	0.73983	-0.410965	0.0912598	-0.489929	0.515712
Q9CZ30	Obg-like ATPase 1	no	0.661889	0.617534	-0.688925	1.23678	0.650242	1.20863	-0.0898207	2.01488	0.231595	0.211983	0.524603	0.532514	0	Obg-like ATPase 1	0.45682	0.945984	0.407119	0.444586	0.448324	0	0	-0.489164	0	1		Q9JKS4	LIM domain-binding protein 3	0.804797	0.789686	-0.139824	1.54502	0.804301	1.34879	0.0738203	2.41835	0.280719	0.244034	0.238665	0.697418
Q8VCW8	Acyl-CoA synthetase family member 2, mitochondrial	no	-0.157816	0.787643	-0.658585	-0.0285556	-0.0743572	0.572198	-1.11309	-1.11143	0.0248338	-0.337965	-0.604314	-1.02656	0	Acyl-CoA synthetase family member 2, mitochondrial	-0.0143283	-0.431671	0.299863	0.414511	0.448724	0	0	0.417342	1	0		Q9WVL0	Maleylacetoacetate isomerase	-0.0149077	0.959795	-0.109483	0.279687	0.0797024	0.712362	-0.949449	-0.707966	0.0739573	-0.305913	-0.890252	-0.861657
P80313	T-complex protein 1 subunit eta	no	0.340766	0.808388	0.242671	0.256769	-0.108896	0.443342	-0.297405	0.717048	-0.55024	-0.202235	-0.466937	0.108671	0	T-complex protein 1 subunit eta	0.412149	0.188522	0.133843	0.236089	0.449331	0	0	0.223627	1	0	Q9CY58	E9PZ16	Basement membrane-specific heparan sulfate proteoglycan core protein;Endorepellin;LG3 peptide	0.483674	0.98054	0.791772	0.565012	0.0451634	0.583506	-0.133765	1.12051	-0.501116	-0.170183	-0.752875	0.273576
Q9CQ89	Protein CutA	no	-0.756693	-0.812125	-0.32432		-0.708058	-0.599806	0.658069		-0.159432	0.0992741	1.11871		0	Protein CutA	-0.631046	-0.216598	0.154196	0.438449	0.450296	0	0	-0.414448	0	1		Q91V16	LYR motif-containing protein 5	-0.613785	-0.639973	0.224781		-0.553998	-0.459641	0.82171		-0.110308	0.131326	0.832769
Q91Z53	Glyoxylate reductase/hydroxypyruvate reductase	no	-0.0828608	0.555204	-0.219461	-0.00288163	-0.254683	0.300158	-0.315307	-0.195539	-0.277762	-0.319606	-0.149791	-0.170035	0	Glyoxylate reductase/hydroxypyruvate reductase	0.0625001	-0.116343	0.170211	0.14097	0.450309	0	0	0.178843	1	0		P48722	Heat shock 70 kDa protein 4L	0.0600474	0.727356	0.32964	0.30536	-0.100623	0.440322	-0.151667	0.207928	-0.228638	-0.287554	-0.435729	-0.00513067
P12787	Cytochrome c oxidase subunit 5A, mitochondrial	no	0.23527	-0.853916		-0.154362	1.50719	-0.612548		0.144381	1.22469	0.0675798		0.354336	0	Cytochrome c oxidase subunit 5A, mitochondrial	-0.257669	0.34634	0.318636	0.620191	0.450322	1	1	-0.60401	0	1		P99028	Cytochrome b-c1 complex subunit 6, mitochondrial	0.378179	-0.681764		0.15388	1.66125	-0.472384		0.547847	1.27381	0.0996318		0.51924
Q64152	Transcription factor BTF3	no		-1.20559	-0.772694	-1.09358		-1.16058	-0.364404	-0.862793		0.178836	0.349027	0.362266	0	Transcription factor BTF3	-1.02396	-0.795925	0.129726	0.232254	0.451847	0	0	-0.228032	0	1		E9QLJ0	Cardiomyopathy-associated protein 5		-1.03344	-0.223593	-0.785341		-1.02041	-0.200763	-0.459327		0.210888	0.0630887	0.52717
P61205	ADP-ribosylation factor 3;ADP-ribosylation factor 1;ADP-ribosylation factor 2	no	0.15399	0.845382	0.946952	0.413297	-0.225451	0.690013	0.529054	0.481128	-0.327777	0.00708651	-0.437649	0.104009	0	ADP-ribosylation factor 3;ADP-ribosylation factor 1;ADP-ribosylation factor 2	0.589905	0.368686	0.185734	0.203021	0.452321	0	0	0.221219	1	0		Q01853	Transitional endoplasmic reticulum ATPase	0.296898	1.01753	1.49605	0.721539	-0.0713909	0.830178	0.692695	0.884594	-0.278654	0.0391384	-0.723587	0.268913
P48787	Troponin I, cardiac muscle	no	-0.500567	-1.65665	-1.30978	-0.146928	-1.21452	-0.862893	-0.436444	0.575907	-0.759549	0.806537	0.920996	0.636586	0	Troponin I, cardiac muscle	-0.903481	-0.484486	0.349649	0.387608	0.453096	0	0	-0.418994	0	1		P35235	Tyrosine-protein phosphatase non-receptor type 11	-0.357659	-1.4845	-0.760675	0.161314	-1.06046	-0.722728	-0.272803	0.979373	-0.710425	0.838589	0.635058	0.80149
P08228	Superoxide dismutase [Cu-Zn]	no	-0.431008	-1.58531	-0.481738	-0.998436	-0.961159	-1.70249	-0.585659	-1.41081	-0.543924	-0.00801593	-0.0677888	-0.435599	0	Superoxide dismutase [Cu-Zn]	-0.874124	-1.16503	0.2695	0.246053	0.455978	0	0	0.290905	1	0	B1AX58	O08807	Peroxiredoxin-4	-0.2881	-1.41316	0.0673633	-0.690194	-0.807099	-1.56233	-0.422018	-1.00734	-0.4948	0.024036	-0.353727	-0.270695
Q91YI0	Argininosuccinate lyase	no	-0.0236185		0.701679	1.40232	-0.705941		0.168523	1.02134	-0.752155		-0.558209	-0.259615	0	Argininosuccinate lyase	0.693462	0.161307	0.411655	0.498635	0.458291	0	0	0.532155	1	0		Q9CT10	Ran-binding protein 3	0.11929		1.25078	1.71057	-0.551881		0.332164	1.4248	-0.703032		-0.844147	-0.0947107
O35943	Frataxin, mitochondrial;Frataxin intermediate form;Frataxin mature form	no	-1.27682	-0.294759	-0.341958		-1.30443	-0.78817	-0.746736		-0.149932	-0.356362	-0.248976		0	Frataxin, mitochondrial;Frataxin intermediate form;Frataxin mature form	-0.637844	-0.946445	0.319776	0.179391	0.459163	0	0	0.308601	1	0		Q60597	2-oxoglutarate dehydrogenase, mitochondrial	-1.13391	-0.122606	0.207143		-1.15037	-0.648005	-0.583095		-0.100809	-0.324311	-0.534914
F8WIV2	Serpin B6	no	0.2165	0.273957	0.613109	-0.289744	0.276975	0.374409	0.670099	0.181078	0.102605	0.0634	0.0874111	0.463449	0	Serpin B6	0.203455	0.37564	0.186235	0.105789	0.459744	0	0	-0.172185	0	1		Q9D8S4	Oligoribonuclease, mitochondrial	0.359409	0.446109	1.16221	0.018498	0.431034	0.514573	0.83374	0.584544	0.151729	0.0954519	-0.198527	0.628354
Q61292	Laminin subunit beta-2	no	-1.22899	-1.78224	-0.215563	-0.602084	-1.35916	-0.933186	0.275397	-0.239326	-0.161785	1.00561	0.562256	0.335694	0	Laminin subunit beta-2	-0.957218	-0.564068	0.345288	0.362695	0.462335	0	0	-0.39315	0	1	P48962	Q9JM14	5(3)-deoxyribonucleotidase, cytosolic type	-1.08608	-1.61009	0.333538	-0.293841	-1.2051	-0.793022	0.439038	0.164141	-0.112662	1.03766	0.276318	0.500598
Q99KR3	Beta-lactamase-like protein 2	no	-0.0393772	0.742043	-0.49766	-0.260128	-0.320643	0.294589	-0.347279	-0.775192	-0.225619	-0.463747	0.200763	-0.496912	0	Beta-lactamase-like protein 2	-0.0137806	-0.287131	0.268755	0.220103	0.462404	0	0	0.273351	1	0		Q8BGC4	Zinc-binding alcohol dehydrogenase domain-containing protein 2	0.103531	0.914195	0.0514416	0.0481139	-0.166584	0.434754	-0.183638	-0.371726	-0.176495	-0.431696	-0.0851753	-0.332008
Q9D8U8	Sorting nexin-5	no	0.634459	-0.674177	1.12197		-0.188855	-0.709364	0.426027		-0.86605	-0.192786	-0.879141		0	Sorting nexin-5	0.360749	-0.157397	0.536259	0.328136	0.464996	0	0	0.518147	1	0		P14069	Protein S100-A6	0.777367	-0.502025	1.67107		-0.0347957	-0.569199	0.589668		-0.816926	-0.160734	-1.16508
Q02566	Myosin-6	no	-1.52772	-0.774989	-1.51937	-0.733702	-2.11827	-0.237236	-0.312954	-0.242362	-0.557547	0.505095	1.32135	0.353832	0	Myosin-6	-1.13895	-0.727704	0.222215	0.463843	0.465731	0	0	-0.411241	0	1		Q9Z1Q9	Valine--tRNA ligase	-1.38481	-0.602837	-0.970271	-0.425459	-1.96421	-0.0970714	-0.149313	0.161105	-0.508424	0.537147	1.03541	0.518737
P26041	Moesin	no	0.241141	-0.349113	-0.0307675	0.186741	-0.183456	0.0175727	0.165425	0.923557	-0.458076	0.545969	0.149258	0.699034	0	Moesin	0.0120005	0.230775	0.133938	0.24174	0.466766	0	0	-0.218774	0	1	Q00915	F7AA26	A-kinase anchor protein 2	0.38405	-0.176961	0.518334	0.494983	-0.0293966	0.157737	0.329066	1.32702	-0.408952	0.578021	-0.13668	0.863939
Q9CPX4	Ferritin;Ferritin light chain 1;Ferritin light chain 2	no	0.374317	0.909523	2.29225	1.0995	0.106568	0.868286	1.07337	1.14615	-0.502483	-0.338875	-1.26529	-0.0277943	0	Ferritin;Ferritin light chain 1;Ferritin light chain 2	1.1689	0.798595	0.404698	0.238058	0.467051	0	0	0.370303	1	0		Q9D1A2	Cytosolic non-specific dipeptidase	0.517225	1.08167	2.84135	1.40775	0.260628	1.00845	1.23701	1.54962	-0.45336	-0.306823	-1.55123	0.13711
Q9D1X0	Nucleolar protein 3	no	0.424832	-1.25492	-0.403098	-0.0691529	0.0972656	-0.925338	0.694977	0.374051	-0.17435	0.25542	0.927392	0.530466	0	Nucleolar protein 3	-0.325585	0.0602387	0.353384	0.350488	0.467672	0	0	-0.385824	0	1		Q9R1P4	Proteasome subunit alpha type-1;Proteasome subunit alpha type	0.56774	-1.08277	0.146004	0.239089	0.251325	-0.785174	0.858618	0.777517	-0.125227	0.287472	0.641454	0.69537
A2AMM0	Muscle-related coiled-coil protein	no		-0.497078	-1.56962	-1.04723		-0.0513728	-0.913431	-1.08055		0.26273	0.747257	-0.167634	0	Muscle-related coiled-coil protein	-1.03797	-0.681783	0.30965	0.318876	0.46786	0	0	-0.35619	0	1		P35385	Heat shock protein beta-7		-0.324926	-1.02052	-0.738984		0.0887916	-0.74979	-0.67708		0.294782	0.461319	-0.00272928
Q6P6M7	O-phosphoseryl-tRNA(Sec) selenium transferase	no	0.0520613	1.31834		0.461481	-0.269423	0.825338		0.0914966	-0.274672	-0.245924		-0.243834	0	O-phosphoseryl-tRNA(Sec) selenium transferase	0.610629	0.215804	0.373074	0.322084	0.468867	0	0	0.394825	1	0		Q9D1P4	Cysteine and histidine-rich domain-containing protein 1	0.19497	1.4905		0.769723	-0.115363	0.965503		0.494963	-0.225548	-0.213872		-0.0789293
P24472	Glutathione S-transferase A4	no	-0.138874	-1.32128	-0.953922	-1.18182	-0.713511	-1.83607	-0.575988	-1.80684	-0.563202	-0.322761	0.303432	-0.538755	0	Glutathione S-transferase A4	-0.898974	-1.2331	0.264436	0.340896	0.469812	0	0	0.334129	1	0		Q91Z53	Glyoxylate reductase/hydroxypyruvate reductase	0.00403388	-1.14913	-0.404821	-0.873577	-0.559452	-1.6959	-0.412347	-1.40338	-0.514079	-0.290709	0.0174944	-0.373851
Q8VDG5	Phosphopantothenate--cysteine ligase	no	-0.293149	1.65736	-0.526769		-0.35469	0.0727876	-0.746628		-0.29898	-1.61937	-0.284634		0	Phosphopantothenate--cysteine ligase	0.279147	-0.342844	0.692398	0.236619	0.469953	1	1	0.621991	1	0		O55023	Inositol monophosphatase 1	-0.150241	1.82951	0.0223323		-0.200631	0.212952	-0.582987		-0.249857	-1.58732	-0.570572
Q3V384	Lactation elevated protein 1	no	-0.582448	1.14161	0.0558241	0.635535	-0.118436	0.278976	-1.24199	0.635222	0.517545	-0.944236	-1.69361	-0.142714	0	Lactation elevated protein 1	0.312631	-0.111557	0.371774	0.407034	0.471034	0	0	0.424188	1	0		O55234	Proteasome subunit beta type-5	-0.439539	1.31376	0.604925	0.943777	0.0356239	0.419141	-1.07835	1.03869	0.566669	-0.912184	-1.97954	0.0221902
Q9CQV8	14-3-3 protein beta/alpha;14-3-3 protein beta/alpha, N-terminally processed	no	0.891942	-0.587694	0.612271	-0.44509	-0.0339732	-0.671633	0.0240002	-0.124463	-0.9226	-0.103261	-0.596048	0.420635	0	14-3-3 protein beta/alpha;14-3-3 protein beta/alpha, N-terminally processed	0.117857	-0.201517	0.371749	0.159655	0.473326	0	0	0.319374	1	0		Q923D2	Flavin reductase (NADPH)	1.03485	-0.415542	1.16137	-0.136848	0.120086	-0.531469	0.187641	0.279004	-0.873476	-0.071209	-0.881986	0.585539
Q8BMF3	NADP-dependent malic enzyme, mitochondrial	no	-0.23236	0.305792	-1.02532	0.416369	0.000393974	0.472054	-0.101105	0.212617	0.159144	-0.0487683	0.922667	-0.152121	0	NADP-dependent malic enzyme, mitochondrial	-0.133879	0.14599	0.329197	0.126824	0.473373	0	0	-0.279869	0	1		E9QKR0	Guanine nucleotide-binding protein subunit beta-4;Guanine nucleotide-binding protein G(I)/G(S)/G(T) subunit beta-1;Guanine nucleotide-binding protein G(I)/G(S)/G(T) subunit beta-2;Guanine nucleotide-binding protein G(I)/G(S)/G(T) subunit beta-3	-0.0894515	0.477944	-0.476217	0.724611	0.154454	0.612218	0.0625362	0.616083	0.208268	-0.0167164	0.636729	0.0127832
Q8C243	Cathepsin D	no	0.618632	-0.0803039	0.429461	0.290237	-0.068363	0.130966	0.318381	0.334173	-0.822122	0.219152	-0.0521666	0.0524506	0	Cathepsin D	0.314506	0.178789	0.147809	0.0944287	0.473397	0	0	0.135717	1	0		P04117	Fatty acid-binding protein, adipocyte	0.761541	0.0918481	0.978562	0.598479	0.0856966	0.27113	0.482022	0.737639	-0.772998	0.251204	-0.338104	0.217355
O08749	Dihydrolipoyl dehydrogenase, mitochondrial;Dihydrolipoyl dehydrogenase	no	-0.588113	-0.0873287	-1.05253	-0.616719	-0.271143	-0.247317	-0.205088	-0.853213	0.36512	-0.058022	0.87551	-0.268578	0	Dihydrolipoyl dehydrogenase, mitochondrial;Dihydrolipoyl dehydrogenase	-0.586172	-0.39419	0.19733	0.153616	0.473465	0	0	-0.191982	0	1	P42208	Q3TS19	Carbonic anhydrase 1	-0.445205	0.0848233	-0.503425	-0.308477	-0.117083	-0.107152	-0.0414468	-0.449746	0.414244	-0.0259701	0.589572	-0.103674
Q2TPA8	Hydroxysteroid dehydrogenase-like protein 2	no	-0.440534	-0.281981	-1.37964	-0.503968	-0.577276	-0.916184	-0.746974	-1.25531	-0.175578	-0.479439	0.628834	-0.552542	0	Hydroxysteroid dehydrogenase-like protein 2	-0.65153	-0.873935	0.247151	0.144728	0.473648	0	0	0.222405	1	0		P16110	Galectin-3	-0.297626	-0.109829	-0.830537	-0.195726	-0.423217	-0.77602	-0.583333	-0.851839	-0.126454	-0.447387	0.342896	-0.387638
F8VQC7	Kinectin	no	-1.60276	-1.44656	-0.125792		-0.951097	-0.76197	-0.180416		0.647939	0.978441	-0.572315		0	Kinectin	-1.05837	-0.631161	0.468465	0.231891	0.475035	0	0	-0.427212	0	1		Q8VEE1	LIM and cysteine-rich domains protein 1	-1.45985	-1.27441	0.423309		-0.797037	-0.621806	-0.0167747		0.697062	1.01049	-0.858253
Q8BGD9	Eukaryotic translation initiation factor 4B	no	-0.282668	-1.0782	-0.998339	-1.10567	-0.870327	-0.914498	-0.0602439	-0.768151	-0.602846	0.100985	0.808396	0.439642	0	Eukaryotic translation initiation factor 4B	-0.866218	-0.653305	0.195844	0.200048	0.475765	0	0	-0.212913	0	1		P61202	COP9 signalosome complex subunit 2	-0.13976	-0.906044	-0.449237	-0.797428	-0.716268	-0.774334	0.103397	-0.364685	-0.553723	0.133037	0.522458	0.604546
P50544	Very long-chain specific acyl-CoA dehydrogenase, mitochondrial	no	0.129832	0.604055	-0.0374308	0.895958	0.350001	0.823395	0.160594	1.24071	0.19625	0.199258	0.273593	0.347778	0	Very long-chain specific acyl-CoA dehydrogenase, mitochondrial	0.398103	0.643674	0.214463	0.24296	0.477715	0	0	-0.245571	0	1		Q9D1I5	Methylmalonyl-CoA epimerase, mitochondrial	0.27274	0.776207	0.51167	1.2042	0.504061	0.96356	0.324234	1.64417	0.245374	0.23131	-0.0123444	0.512682
P61027	Ras-related protein Rab-10	no	-0.120576	1.17305	0.887701	1.02088	-0.205623	0.938247	-0.0389158	0.970721	-0.114207	-0.257651	-1.29584	-0.278315	0	Ras-related protein Rab-10	0.740263	0.416107	0.292807	0.312759	0.47805	0	0	0.324156	1	0	Q9JJW5	A8DUK4		0.0223323	1.3452	1.4368	1.32912	-0.0515636	1.07841	0.124725	1.37419	-0.0650835	-0.225599	-1.58178	-0.113411
Q9DB20	ATP synthase subunit O, mitochondrial	no	-0.00370075	1.34333	-0.425038	1.41085	1.7075	1.23111	-0.379522	1.8634	1.533	-0.060227	0.198496	0.402349	0	ATP synthase subunit O, mitochondrial	0.58136	1.10562	0.467598	0.512989	0.4789	0	0	-0.524263	0	1		O70400	PDZ and LIM domain protein 1	0.139208	1.51548	0.124063	1.71909	1.86156	1.37127	-0.215881	2.26687	1.58212	-0.028175	-0.0874421	0.567253
P97429	Annexin A4;Annexin	no	0.581655	0.658333	0.687851	0.54954	0.20827	0.831719	0.311133	0.653986	-0.344128	0.0910845	-0.400793	0.00860693	0	Annexin A4;Annexin	0.619345	0.501277	0.0322831	0.145637	0.48171	0	0	0.118068	1	0		Q8R164	Valacyclovir hydrolase	0.724563	0.830485	1.23695	0.857783	0.36233	0.971884	0.474774	1.05745	-0.295004	0.123136	-0.686731	0.173511
Q9CU62	Structural maintenance of chromosomes protein 1A	no	0.0642349	0.242212	-0.0675957	0.565816	0.470743	0.407029	-0.056087	0.567286	0.584168	0.186543	0.0280821	0.021089	0	Structural maintenance of chromosomes protein 1A	0.201167	0.347243	0.137124	0.13842	0.481778	0	0	-0.146076	0	1		P55264	Adenosine kinase	0.207143	0.414364	0.481505	0.874058	0.624803	0.547194	0.107554	0.970752	0.633292	0.218595	-0.257856	0.185993
Q9DCT8	Cysteine-rich protein 2	no	1.0329	-0.679972	-1.75214	-0.589317	0.747666	-0.892314	0.405267	-0.212798	-0.461989	-0.300399	2.67853	0.18808	0	Cysteine-rich protein 2	-0.497131	0.0119553	0.57431	0.361038	0.486446	0	0	-0.509086	0	1		Q9WVA2	Mitochondrial import inner membrane translocase subunit Tim8 A;Putative mitochondrial import inner membrane translocase subunit Tim8 A-B	1.17581	-0.50782	-1.20304	-0.281075	0.901726	-0.752149	0.568908	0.190668	-0.412865	-0.268348	2.39259	0.352984
P84084	ADP-ribosylation factor 5	no	0.522303	1.07253	1.10552	0.634176	0.305687	1.02945	0.0255195	1.07131	-0.0256553	0.117468	-0.940403	0.0577767	0	ADP-ribosylation factor 5	0.833632	0.607991	0.149361	0.261876	0.489455	0	0	0.225641	1	0		Q9EQH3	Vacuolar protein sorting-associated protein 35	0.665211	1.24469	1.65462	0.942418	0.459746	1.16962	0.18916	1.47477	0.0234682	0.149519	-1.22634	0.222681
P24270	Catalase	no	0.0414354	0.0815008	-0.333112	0.487066	-0.289123	0.21977	-0.614494	0.194488	-0.222362	0.204165	-0.23508	-0.237797	0	Catalase	0.0692226	-0.12234	0.167678	0.201546	0.493395	0	0	0.191562	1	0		P70296	Phosphatidylethanolamine-binding protein 1;Hippocampal cholinergic neurostimulating peptide	0.184344	0.253653	0.215989	0.795308	-0.135063	0.359934	-0.450853	0.597955	-0.173238	0.236217	-0.521018	-0.0728924
E9QPD4	Oxysterol-binding protein;Oxysterol-binding protein 1	no	0.0829836	0.633912	0.101388	0.164407	-0.00454013	0.463128	0.490611	0.570173	-0.114086	-0.408728	0.707525	0.330689	0	Oxysterol-binding protein;Oxysterol-binding protein 1	0.245673	0.379843	0.130582	0.130122	0.494137	0	0	-0.13417	0	1		P59999	Actin-related protein 2/3 complex subunit 4	0.225892	0.806064	0.650489	0.472649	0.149519	0.603293	0.654252	0.973639	-0.0649628	-0.376676	0.421587	0.495593
E9Q447	Spectrin alpha chain, brain	no	-0.245451		0.622874	-0.441411	-0.587585		-0.332737	0.000113787	-0.311731		-0.938885	0.575462	0	Spectrin alpha chain, brain	-0.0213294	-0.306736	0.327031	0.170151	0.495076	0	0	0.285407	1	0		P68040	Guanine nucleotide-binding protein subunit beta-2-like 1	-0.102543		1.17197	-0.133169	-0.433526		-0.169096	0.40358	-0.262607		-1.22482	0.740366
B1AQF4	Dual specificity protein phosphatase 3	no	0.215713	0.471636	0.293274	0.0957387	0.110417	0.479993	-0.0691346	0.148415	-0.0725546	-0.0254307	-0.388445	0.059383	0	Dual specificity protein phosphatase 3	0.269091	0.167423	0.0787981	0.114481	0.495384	0	0	0.101668	1	0		Q8CHT0	Delta-1-pyrroline-5-carboxylate dehydrogenase, mitochondrial	0.358621	0.643788	0.842376	0.403981	0.264476	0.620157	0.0945064	0.551881	-0.0234311	0.00662125	-0.674383	0.224287
Q544X6	Ferrochelatase;Ferrochelatase, mitochondrial	no	0.496417	0.753288	-0.290401	1.09748	0.447066	0.973934	0.52037	1.11078	0.166244	0.262613	0.674624	0.0339669	0	Ferrochelatase;Ferrochelatase, mitochondrial	0.514195	0.763037	0.295109	0.164348	0.49643	0	0	-0.248842	0	1	Q60932	P10711	Transcription elongation factor A protein 1	0.639325	0.92544	0.2587	1.40572	0.601126	1.1141	0.684011	1.51424	0.215368	0.294665	0.388686	0.198871
P56213	FAD-linked sulfhydryl oxidase ALR	no	-0.690756		-1.09482	-0.880065	-0.222467		-0.164536	-1.32893	0.395332		0.821891	-0.423571	0	FAD-linked sulfhydryl oxidase ALR	-0.888547	-0.571979	0.11672	0.378847	0.496553	0	0	-0.316568	0	1		Q924D0	Reticulon-4-interacting protein 1, mitochondrial	-0.547847		-0.545719	-0.571822	-0.0684077		-0.000894759	-0.925468	0.444455		0.535953	-0.258667
P04117	Fatty acid-binding protein, adipocyte	no	-0.299358	-1.35618	-0.048809	-1.16407	-0.578031	-1.59028	-0.320123	-1.77631	-0.279961	-0.179206	-0.253812	-0.568923	0	Fatty acid-binding protein, adipocyte	-0.717104	-1.06619	0.320068	0.362152	0.497703	0	0	0.349081	1	0		Q8R123	FAD synthase;Molybdenum cofactor biosynthesis protein-like region;FAD synthase region	-0.15645	-1.18403	0.500292	-0.85583	-0.423971	-1.45012	-0.156482	-1.37284	-0.230838	-0.147154	-0.53975	-0.404019
Q91WU5	Arsenite methyltransferase	no	-0.537509	-1.15225	-0.569164	-1.18779	-0.622551	-0.937841	-0.208715	-0.957023	-0.0689813	0.129771	0.405493	0.0867845	0	Arsenite methyltransferase	-0.861679	-0.681533	0.178286	0.175268	0.498289	0	0	-0.180146	0	1		Q9EQ20	Methylmalonate-semialdehyde dehydrogenase [acylating], mitochondrial	-0.394601	-0.980098	-0.0200624	-0.879549	-0.468491	-0.797677	-0.0450741	-0.553557	-0.0198577	0.161823	0.119555	0.251689
Q9CR21	Acyl carrier protein, mitochondrial;Acyl carrier protein	no	-0.76644	-1.36201	-0.311782	-0.734238	-0.698957	-1.74556	-0.540317	-1.19324	0.0550789	-0.332394	-0.178168	-0.358258	0	Acyl carrier protein, mitochondrial;Acyl carrier protein	-0.793617	-1.04452	0.215928	0.271909	0.498447	0	0	0.250902	1	0		Q3UQY4	Acylpyruvase FAHD1, mitochondrial	-0.623532	-1.18986	0.237319	-0.425996	-0.544898	-1.6054	-0.376676	-0.789771	0.104203	-0.300342	-0.464106	-0.193354
Q9Z2U0	Proteasome subunit alpha type-7;Proteasome subunit alpha type-7-like	no	0.133052	0.109585	0.0495499	-0.0766594	0.134358	0.273508	-0.0278433	0.0639276	0.0251079	0.225924	0.0622609	0.208382	0	Proteasome subunit alpha type-7;Proteasome subunit alpha type-7-like	0.053882	0.110988	0.0469313	0.0635398	0.499183	0	0	-0.0571056	0	1	P10126	O70423	Membrane primary amine oxidase	0.275961	0.281737	0.598651	0.231583	0.288418	0.413672	0.135798	0.467394	0.0742315	0.257976	-0.223677	0.373286
P07724	Serum albumin	no	-0.00592945	-0.813051	0.703072	-0.0266454	-0.119421	-0.744331	0.104075	-0.43062	-0.0681332	0.128223	-0.552161	-0.36839	0	Serum albumin	-0.0356384	-0.297574	0.309708	0.184922	0.500943	0	0	0.261936	1	0		Q9DCS3	Trans-2-enoyl-CoA reductase, mitochondrial	0.136979	-0.640899	1.25217	0.281597	0.0346383	-0.604166	0.267715	-0.0271541	-0.0190096	0.160275	-0.838099	-0.203485
Q3TS19	Carbonic anhydrase 1	no	-0.0859086	-1.11529	-0.11262		0.408317	0.380957	-0.888276		0.449025	1.52949	-0.679226		0	Carbonic anhydrase 1	-0.437938	-0.0330008	0.338762	0.427711	0.501224	0	0	-0.404937	0	1		Q6W8Q3	Purkinje cell protein 4-like protein 1	0.0569996	-0.943134	0.436482		0.562377	0.521121	-0.724635		0.498149	1.56155	-0.965164
Q3TC72	Fumarylacetoacetate hydrolase domain-containing protein 2A	no	-0.398851	0.061838	-1.11467	-0.611351	-0.0587428	0.290481	-0.545515	-0.773296	0.397027	0.199872	0.779483	-0.165438	0	Fumarylacetoacetate hydrolase domain-containing protein 2A	-0.515758	-0.271768	0.244117	0.239439	0.502318	0	0	-0.24399	0	1		Q03734	Serine protease inhibitor A3M	-0.255942	0.23399	-0.565567	-0.303109	0.0953169	0.430645	-0.381874	-0.369829	0.44615	0.231924	0.493545	-0.000533933
Q9QZ23	NFU1 iron-sulfur cluster scaffold homolog, mitochondrial	no	-0.149372	-1.03878	-0.183185	-0.644983	-0.330587	-1.52675	-0.162343	-1.1055	-0.205928	-0.413945	0.152142	-0.27016	0	NFU1 iron-sulfur cluster scaffold homolog, mitochondrial	-0.504081	-0.781297	0.211059	0.322369	0.503048	0	0	0.277216	1	0	E9PWE8	Q922D4	Serine/threonine-protein phosphatase 6 regulatory subunit 3	-0.00646329	-0.866631	0.365916	-0.33674	-0.176528	-1.38659	0.00129788	-0.702037	-0.156804	-0.381893	-0.133796	-0.105256
E9QKI3	A-kinase anchor protein 1, mitochondrial	no	-1.23202	0.87847	-2.29146		-1.02021	-0.755675	-3.86114		0.223378	-1.53587	-1.40866		0	A-kinase anchor protein 1, mitochondrial	-0.881672	-1.87901	0.931697	0.994004	0.504879	1	1	0.997336	1	0		Q91ZA3	Propionyl-CoA carboxylase alpha chain, mitochondrial	-1.08911	1.05062	-1.74236		-0.866147	-0.61551	-3.6975		0.272501	-1.50381	-1.6946
Q8BGK2	[Protein ADP-ribosylarginine] hydrolase-like protein 1	no	0.70997	1.12082	0.348914	0.822882	0.669608	0.727403	0.435963	0.666077	0.0482176	-0.340732	0.0584317	-0.0172069	0	[Protein ADP-ribosylarginine] hydrolase-like protein 1	0.750646	0.624763	0.159502	0.0644842	0.505347	0	0	0.125883	1	0		Q9JKB1	Ubiquitin carboxyl-terminal hydrolase isozyme L3;Ubiquitin carboxyl-terminal hydrolase isozyme L4	0.852878	1.29297	0.898015	1.13112	0.823668	0.867568	0.599603	1.06954	0.0973411	-0.30868	-0.227506	0.147697
Q99PT1	Rho GDP-dissociation inhibitor 1	no	0.0496646	-0.106042	0.35902	-0.191394	-0.217092	-0.0322989	0.123122	-0.172392	-0.237159	-0.00957761	-0.338973	-0.000117972	0	Rho GDP-dissociation inhibitor 1	0.0278123	-0.0746651	0.121156	0.0767846	0.506464	0	0	0.102477	1	0		P32020	Non-specific lipid-transfer protein	0.192573	0.0661102	0.908121	0.116848	-0.0630323	0.107866	0.286763	0.231075	-0.188036	0.0224743	-0.624911	0.164786
P27612	Phospholipase A-2-activating protein	no	0.319353	1.11796	0.364927	0.425817	0.383783	0.753058	-0.109279	0.46642	0.261333	-0.268521	-0.490269	-0.0283191	0	Phospholipase A-2-activating protein	0.557014	0.373496	0.188249	0.179323	0.506797	0	0	0.183518	1	0		Q9D0M3	Cytochrome c1, heme protein, mitochondrial	0.462262	1.29011	0.914029	0.734059	0.537843	0.893223	0.0543624	0.869886	0.310457	-0.236469	-0.776207	0.136585
P09528	Ferritin heavy chain	no	-0.740666	-1.46252	-0.197812	-0.86925	-1.11841	-1.57152	-0.291025	-1.36405	-0.294099	-0.0807924	-0.285169	-0.382412	0	Ferritin heavy chain	-0.817561	-1.08625	0.25959	0.280784	0.508761	0	0	0.26869	1	0		P97355	Spermine synthase	-0.597758	-1.29036	0.351289	-0.561008	-0.964348	-1.43135	-0.127384	-0.960586	-0.244976	-0.0487405	-0.571107	-0.217507
Q8K4F5	Abhydrolase domain-containing protein 11	no	0.446951	0.549197	-0.612164	0.827471	-0.307137	0.199418	0.042252	0.291742	-0.761344	-0.563291	0.594648	-0.601199	0	Abhydrolase domain-containing protein 11	0.302864	0.0565688	0.315427	0.131719	0.510915	0	0	0.246295	1	0		O08553	Dihydropyrimidinase-related protein 2	0.589859	0.721349	-0.0630625	1.13571	-0.153078	0.339583	0.205893	0.695209	-0.71222	-0.531239	0.30871	-0.436295
P28665	Murinoglobulin-1	no	-0.676276	-0.935734	-0.224176	0.761028	-0.436481	-0.468197	0.489327	0.684329	0.287617	0.751195	0.783678	-0.0256968	0	Murinoglobulin-1	-0.268789	0.0672446	0.373427	0.30268	0.511765	0	0	-0.336034	0	1	F8WJI6	E9Q447	Spectrin alpha chain, brain	-0.533368	-0.763582	0.324926	1.06927	-0.282421	-0.328032	0.652968	1.0878	0.33674	0.783247	0.49774	0.139208
P97807	Fumarate hydratase, mitochondrial	no	-0.211225	-0.384784	-0.859659	-0.338084	-0.442318	-0.616702	-0.408036	-0.7982	-0.20596	-0.259102	0.618216	-0.448906	0	Fumarate hydratase, mitochondrial	-0.448438	-0.566314	0.141893	0.0897854	0.513585	0	0	0.117876	1	0		P50171	Estradiol 17-beta-dehydrogenase 8	-0.0683169	-0.212632	-0.310558	-0.0298416	-0.288258	-0.476537	-0.244395	-0.394734	-0.156836	-0.22705	0.332278	-0.284001
Q03265	ATP synthase subunit alpha, mitochondrial;ATP synthase subunit alpha	no	-0.626348	0.0731656	-0.835933	0.0855432	-0.104847	0.240751	-0.593528	-0.0234895	0.536127	0.222663	0.268842	-0.15972	0	ATP synthase subunit alpha, mitochondrial;ATP synthase subunit alpha	-0.325893	-0.120278	0.237862	0.174144	0.513894	0	0	-0.205615	0	1		Q9DBP5	UMP-CMP kinase	-0.48344	0.245318	-0.286832	0.393785	0.0492126	0.380916	-0.429887	0.379977	0.585251	0.254715	-0.0170959	0.00518438
P97927	Laminin subunit alpha-4	no	-0.30369	-1.46104	0.0593296	-0.403829	-0.648921	-0.705664	0.251469	0.146259	-0.368565	0.4178	-0.395207	0.277429	0	Laminin subunit alpha-4	-0.527308	-0.239214	0.326759	0.254099	0.513992	0	0	-0.288094	0	1		D3Z494		-0.160782	-1.28889	0.608431	-0.095587	-0.494861	-0.5655	0.41511	0.549726	-0.319442	0.449852	-0.681145	0.442333
B7ZCF1	26S protease regulatory subunit 6A	no	-0.708091	-0.0644576	0.7814	0.544217	0.22999	0.108766	1.05458	0.272414	0.921288	0.171713	0.317051	-0.568751	0	26S protease regulatory subunit 6A	0.138267	0.416438	0.333646	0.215522	0.514192	0	0	-0.278171	0	1	E9Q5W3	O35943	Frataxin, mitochondrial;Frataxin intermediate form;Frataxin mature form	-0.565182	0.107694	1.3305	0.852459	0.38405	0.24893	1.21822	0.675881	0.970412	0.203765	0.0311129	-0.403847
Q61035	Histidine--tRNA ligase, cytoplasmic	no	-0.10982	-0.0958717	-0.194085	-0.278389	-0.082297	0.212272	-0.0494072	-0.386151	0.127072	0.28131	0.24953	-0.109986	0	Histidine--tRNA ligase, cytoplasmic	-0.169541	-0.0763958	0.042273	0.122488	0.514957	0	0	-0.0931456	0	1		Q1XH17	Tripartite motif-containing protein 72	0.0330882	0.0762804	0.355016	0.0298531	0.0717627	0.352437	0.114234	0.0173148	0.176195	0.313362	-0.0364075	0.0549179
Q91YY4	ATP synthase mitochondrial F1 complex assembly factor 2	no	-0.222295	0.122746	-1.2634	-0.363299	-0.0174744	0.0909272	-0.424916	-0.449329	0.0142412	-0.0738551	0.941565	-0.328528	0	ATP synthase mitochondrial F1 complex assembly factor 2	-0.431563	-0.200198	0.295476	0.138656	0.515286	0	0	-0.231365	0	1		P52825	Carnitine O-palmitoyltransferase 2, mitochondrial	-0.0793866	0.294898	-0.714302	-0.0550568	0.136585	0.231092	-0.261275	-0.0458623	0.0633648	-0.0418032	0.655627	-0.163623
Q8R3Q6	Coiled-coil domain-containing protein 58	no	-0.448019	-1.17719	-0.433136	-1.14368	-0.717642	-1.68396	-0.317344	-1.58062	-0.325154	-0.410471	-0.00957958	-0.562124	0	Coiled-coil domain-containing protein 58	-0.800507	-1.07489	0.20794	0.332694	0.515315	0	0	0.274383	1	0		P09671	Superoxide dismutase [Mn], mitochondrial	-0.305111	-1.00504	0.115965	-0.835439	-0.563582	-1.54379	-0.153703	-1.17715	-0.276031	-0.378419	-0.295517	-0.39722
Q3THS6	S-adenosylmethionine synthase isoform type-2;S-adenosylmethionine synthase	no		0.836124	0.476849	0.0347399		0.63382	0.0265315	0.0325948		-0.131021	-0.160898	-0.237584	0	S-adenosylmethionine synthase isoform type-2;S-adenosylmethionine synthase	0.449238	0.230982	0.231751	0.201427	0.517169	0	0	0.218255	1	0		P52480	Pyruvate kinase isozymes M1/M2		1.00828	1.02595	0.342982		0.773985	0.190172	0.436061		-0.098969	-0.446836	-0.07268
P28654	Decorin	no	1.15469	1.20132	0.462967	0.451969	1.84208	1.35818	0.708676	0.421105	0.791158	0.158247	-0.211487	0.446457	0	Decorin	0.817739	1.08251	0.208232	0.320175	0.518163	0	0	-0.26477	0	1		P85094	Isochorismatase domain-containing protein 2A, mitochondrial	1.2976	1.37348	1.01207	0.760211	1.99614	1.49834	0.872317	0.824571	0.840282	0.190299	-0.497425	0.611361
Q9D1A2	Cytosolic non-specific dipeptidase	no	0.323745	0.701774	0.665272	0.747829	0.20726	0.823958	0.206077	0.68099	-0.0562971	-0.00744857	-0.514387	-0.00824887	0	Cytosolic non-specific dipeptidase	0.609655	0.479571	0.0967883	0.160241	0.518499	0	0	0.130084	1	0		P26350	Prothymosin alpha;Thymosin alpha	0.466653	0.873926	1.21437	1.05607	0.361319	0.964123	0.369718	1.08446	-0.00717357	0.0246034	-0.800324	0.156655
P14094	Sodium/potassium-transporting ATPase subunit beta-1	no	0.185584	-0.574219		0.64665	0.536402	-0.185468		0.927362	0.315561	0.283746		0.21083	0	Sodium/potassium-transporting ATPase subunit beta-1	0.0860049	0.426099	0.355934	0.325946	0.520163	0	0	-0.340094	0	1		P06745	Glucose-6-phosphate isomerase	0.328492	-0.402067		0.954893	0.690462	-0.0453032		1.33083	0.364685	0.315798		0.375735
P11499	Heat shock protein HSP 90-beta	no	0.123968	0.0249185	0.321244	-0.225819	-0.0729927	-0.0451455	0.0887748	-0.0657994	-0.199685	0.00834951	-0.189898	0.128702	0	Heat shock protein HSP 90-beta	0.0610779	-0.0237907	0.113746	0.0379831	0.521565	0	0	0.0848686	1	0		Q9CR68	Cytochrome b-c1 complex subunit Rieske, mitochondrial;Cytochrome b-c1 complex subunit 11	0.266877	0.197071	0.870345	0.0824231	0.081067	0.0950189	0.252416	0.337667	-0.150561	0.0404014	-0.475836	0.293606
P12382	6-phosphofructokinase, liver type	no	-0.071832	1.06609	-0.599768	0.99434	-0.353812	1.20764	0.360924	1.92664	-0.103186	0.164933	0.85251	0.842579	0	6-phosphofructokinase, liver type	0.347206	0.785347	0.409056	0.496545	0.522143	0	0	-0.43814	0	1		P56213	FAD-linked sulfhydryl oxidase ALR	0.0710762	1.23824	-0.0506668	1.30258	-0.199752	1.3478	0.524565	2.3301	-0.0540627	0.196985	0.566572	1.00748
Q80W21	Glutathione S-transferase Mu 7	no	-0.224644		-1.51213	-0.200408	-0.248139		-0.124783	-0.552335	-0.433745		1.29342	-0.660477	0	Glutathione S-transferase Mu 7	-0.645726	-0.308419	0.433257	0.12705	0.522832	0	0	-0.337307	0	1		Q9CZS1	Aldehyde dehydrogenase X, mitochondrial	-0.0817359		-0.963026	0.107834	-0.0940793		0.0388575	-0.148869	-0.384621		1.00748	-0.495573
Q03734	Serine protease inhibitor A3M	no	-0.389235		0.235068	0.448138	-0.035567		-0.0382542	-0.214296	-0.00242301		-0.0685633	-0.706375	0	Serine protease inhibitor A3M	0.09799	-0.0960391	0.251258	0.0591335	0.523786	0	0	0.194029	1	0		Q9CQ62	2,4-dienoyl-CoA reductase, mitochondrial	-0.246327		0.784169	0.75638	0.118493		0.125387	0.18917	0.0467006		-0.354501	-0.541471
P22599	Alpha-1-antitrypsin 1-2	no	-0.40912	-0.357257	0.127256	0.169401	-0.473375	-0.321076	-0.0492739	-0.122711	-0.00717972	0.209178	-0.331671	-0.344011	0	Alpha-1-antitrypsin 1-2	-0.11743	-0.241609	0.154041	0.0962463	0.524388	0	0	0.124179	1	0		P70695	Fructose-1,6-bisphosphatase isozyme 2	-0.266212	-0.185105	0.676358	0.477643	-0.319316	-0.180912	0.114367	0.280755	0.0419438	0.24123	-0.617609	-0.179106
P32921	Tryptophan--tRNA ligase, cytoplasmic;T1-TrpRS;T2-TrpRS	no	-0.0130318	1.43692	0.254704	0.0659451	-0.273774	0.764465	-0.0843482	0.228402	-0.0863006	-0.4848	-0.218715	-0.174095	0	Tryptophan--tRNA ligase, cytoplasmic;T1-TrpRS;T2-TrpRS	0.436133	0.158686	0.338289	0.226921	0.52471	0	0	0.277447	1	0		Q64669	NAD(P)H dehydrogenase [quinone] 1	0.129877	1.60907	0.803806	0.374187	-0.119714	0.904629	0.0792927	0.631869	-0.0371771	-0.452748	-0.504653	-0.0091903
Q99PL5	Ribosome-binding protein 1	no	0.178558	-0.868947	0.802245	-1.00984	0.0112414	-0.322602	0.494182	0.216647	-0.0165995	0.697131	-0.435292	1.0148	0	Ribosome-binding protein 1	-0.224495	0.0998669	0.43289	0.172109	0.525278	0	0	-0.324362	0	1		P63330	Serine/threonine-protein phosphatase 2A catalytic subunit alpha isoform;Serine/threonine-protein phosphatase 2A catalytic subunit beta isoform	0.321466	-0.696795	1.35135	-0.701593	0.165301	-0.182438	0.657823	0.620113	0.032524	0.729183	-0.72123	1.1797
Q3TML0	Protein disulfide-isomerase A6	no		0.78554	0.683989	0.978766		0.777024	0.644209	2.08003		-0.0406326	-0.00938478	1.18881	0	Protein disulfide-isomerase A6	0.816098	1.16709	0.0864557	0.45808	0.52548	0	0	-0.350991	0	1	Q149B8	Q6PHQ9			0.957692	1.23309	1.28701		0.917188	0.807849	2.4835		-0.00858066	-0.295323	1.35372
Q9CWK8	Sorting nexin-2	no	0.270361	-0.55587		-0.682419	-0.205818	0.109178		-0.17623	-0.437762	0.244028		0.64862	0	Sorting nexin-2	-0.322643	-0.0909567	0.298744	0.100431	0.526332	0	0	-0.231686	0	1		Q9CRB6	Tubulin polymerization-promoting protein family member 3	0.413269	-0.383718		-0.374177	-0.051758	0.249342		0.227236	-0.388639	0.27608		0.813525
Q60668	Heterogeneous nuclear ribonucleoprotein D0	no	0.179828	-0.754804	0.455364	0.0655711	0.785092	-0.35814	0.177776	0.275899	0.758066	0.31652	-0.482359	0.184008	0	Heterogeneous nuclear ribonucleoprotein D0	-0.0135105	0.220157	0.260287	0.234251	0.529666	0	0	-0.233667	0	1		D3YW52	Alpha-2-macroglobulin;Alpha-2-macroglobulin 165 kDa subunit;Alpha-2-macroglobulin 35 kDa subunit	0.322736	-0.582652	1.00446	0.373813	0.939151	-0.217975	0.341417	0.679365	0.80719	0.348572	-0.768297	0.348912
P63158	High mobility group protein B1	no	-0.241321	-1.50271	-0.958571	-0.800454	-0.691044	-1.35155	0.00807825	-0.442745	-0.555353	0.291722	0.976579	0.20034	0	High mobility group protein B1	-0.875764	-0.619315	0.259504	0.283742	0.529797	0	0	-0.256449	0	1		P30115	Glutathione S-transferase A3;Glutathione S-transferase A1;Glutathione S-transferase;Glutathione S-transferase A2	-0.0984129	-1.33056	-0.40947	-0.492212	-0.536984	-1.21139	0.171719	-0.0392789	-0.50623	0.323774	0.690641	0.365245
A2AFQ2	3-hydroxyacyl-CoA dehydrogenase type-2	no	0.422494	0.483701	-1.52939	0.495705	0.0402796	0.541814	-0.166862	0.981268	-0.359556	0.0738943	1.41245	0.456245	0	3-hydroxyacyl-CoA dehydrogenase type-2	-0.0318713	0.349125	0.499429	0.257934	0.531201	0	0	-0.380996	0	1		Q91VF2	Histamine N-methyltransferase	0.565402	0.655853	-0.980284	0.803947	0.194339	0.681978	-0.00322079	1.38473	-0.310433	0.105946	1.12651	0.621149
Q9R1P0	Proteasome subunit alpha type-4;Proteasome subunit alpha type	no	0.103561	0.437951	-0.145288	-0.326164	0.108133	0.47104	-0.00996525	0.0316777	-0.000468905	0.124733	0.00140962	0.226534	0	Proteasome subunit alpha type-4;Proteasome subunit alpha type	0.0175148	0.150221	0.165527	0.1097	0.532421	0	0	-0.132707	0	1		Q61247	Alpha-2-antiplasmin	0.246469	0.610103	0.403813	-0.017922	0.262193	0.611204	0.153676	0.435144	0.0486547	0.156785	-0.284528	0.391438
Q6ZQ38	Cullin-associated NEDD8-dissociated protein 1	no	0.305041	1.1064		0.107007	0.642289	1.05575		0.541616	0.437436	0.0875035		0.228732	0	Cullin-associated NEDD8-dissociated protein 1	0.506148	0.746551	0.30552	0.157307	0.534698	0	0	-0.240403	0	1		P62821	Ras-related protein Rab-1A	0.447949	1.27855		0.415249	0.796349	1.19591		0.945082	0.48656	0.119555		0.393636
Q8VDQ1	Prostaglandin reductase 2	no	-0.346078	0.183789	-1.0872	-0.622533	-0.342112	0.237936	-0.266912	-0.644696	-0.0626616	-0.0270113	0.382335	-0.153695	0	Prostaglandin reductase 2	-0.468004	-0.253946	0.265672	0.183161	0.534737	0	0	-0.214058	0	1		P05132	cAMP-dependent protein kinase catalytic subunit alpha;cAMP-dependent protein kinase catalytic subunit beta	-0.20317	0.355941	-0.538094	-0.31429	-0.188052	0.378101	-0.103271	-0.24123	-0.0135381	0.0050406	0.0963968	0.0112093
Q3TXS7	26S proteasome non-ATPase regulatory subunit 1	no	-0.113632	0.20593		0.993842	0.846084	0.472098		0.518553	0.956923	0.379483		-0.278893	0	26S proteasome non-ATPase regulatory subunit 1	0.362046	0.612245	0.329092	0.117686	0.53499	0	0	-0.250199	0	1	Q9DC77	Q9Z0X1	Apoptosis-inducing factor 1, mitochondrial	0.0292761	0.378082		1.30208	1.00014	0.612263		0.922019	1.00605	0.411535		-0.113988
O35864	COP9 signalosome complex subunit 5	no	-0.053817	0.0319314	0.00445586	0.172236	0.041414	0.282027	-0.203589	0.442391	-0.00703957	0.0506507	-0.0616444	0.0974085	0	COP9 signalosome complex subunit 5	0.0387016	0.140561	0.0479668	0.14124	0.535207	0	0	-0.101859	0	1		P80314	T-complex protein 1 subunit beta	0.0890913	0.204084	0.553557	0.480478	0.195474	0.422192	-0.039948	0.845858	0.042084	0.0827026	-0.347582	0.262313
E9Q5J9	0	no	-0.293838	-1.89933	0.687238		-1.8261	-1.40055	-0.146859		-1.44844	0.580631	-0.799804		0	0	-0.501977	-1.1245	0.753896	0.504021	0.535282	1	1	0.622525	1	0		P08752	Guanine nucleotide-binding protein G(i) subunit alpha-2;Guanine nucleotide-binding protein G(i) subunit alpha-1;Guanine nucleotide-binding protein G(k) subunit alpha;Guanine nucleotide-binding protein G(o) subunit alpha	-0.150929	-1.72718	1.23634		-1.67204	-1.26039	0.0167816		-1.39931	0.612683	-1.08574
Q9CQJ6	Density-regulated protein	no	-0.426927	-1.46027	-0.659316	-1.58086	-0.52748	-1.03205	-0.0358756	-1.43345	-0.0817926	0.413675	0.498694	0.170007	0	Density-regulated protein	-1.03184	-0.757214	0.287181	0.303581	0.535517	0	0	-0.274631	0	1		P31938	Dual specificity mitogen-activated protein kinase kinase 1;SH2 domain-containing protein 6	-0.284019	-1.28812	-0.110215	-1.27262	-0.373421	-0.891886	0.127765	-1.02998	-0.0326691	0.445727	0.212756	0.334911
Q8C7G9	0	no	-0.161509	0.424646	0.285529	-0.925917	-0.107219	-0.411471	0.0714735	-0.914934	0.0438956	-0.824809	-0.403489	0.00437943	0	0	-0.0943126	-0.340538	0.304094	0.215861	0.536157	0	0	0.246225	1	0		P56391	Cytochrome c oxidase subunit 6B1	-0.0186003	0.596798	0.83463	-0.617675	0.0468402	-0.271306	0.235114	-0.511468	0.0930192	-0.792757	-0.689427	0.169284
Q91UZ5	Inositol monophosphatase 2	no	-0.514816		-1.62304	-0.334546	-0.802092		-0.987752	-1.67214	-0.00410002		0.587174	-1.60255	0	Inositol monophosphatase 2	-0.824135	-1.15399	0.402829	0.264558	0.536818	0	0	0.32986	1	0		Q61166	Microtubule-associated protein RP/EB family member 1	-0.371908		-1.07394	-0.0263043	-0.648033		-0.824111	-1.26867	0.0450235		0.301237	-1.43764
Q9DC61	Mitochondrial-processing peptidase subunit alpha	no	-0.538476	0.298337	-0.692586	-0.0148654	-0.212683	0.433388	-0.231066	-0.195789	0.30871	0.0507869	0.443887	-0.0641958	0	Mitochondrial-processing peptidase subunit alpha	-0.236898	-0.0515372	0.229923	0.161802	0.536852	0	0	-0.18536	0	1	Q8BHN3	A2AGQ1	Myosin-binding protein C, cardiac-type	-0.395568	0.470489	-0.143484	0.293377	-0.0586232	0.573553	-0.0674248	0.207678	0.357833	0.0828389	0.157949	0.100709
P63038	60 kDa heat shock protein, mitochondrial	no	-0.324761	-1.53829	-0.65459	-0.742483	-0.628352	-1.65239	-0.435137	-1.62732	-0.250915	-0.111637	0.207862	-0.849083	0	60 kDa heat shock protein, mitochondrial	-0.815032	-1.0858	0.257306	0.322347	0.53701	0	0	0.270769	1	0		P07759	Serine protease inhibitor A3K	-0.181853	-1.36614	-0.105489	-0.434241	-0.474292	-1.51223	-0.271496	-1.22385	-0.201792	-0.0795847	-0.0780763	-0.684179
Q8CDN6	Thioredoxin-like protein 1	no	-0.401282	-1.2129	-0.239459	-0.471483	-0.253369	-0.805284	-0.0502071	-0.508474	0.126816	0.418011	0.0214081	0.0379836	0	Thioredoxin-like protein 1	-0.581282	-0.404333	0.216072	0.163249	0.53945	0	0	-0.176949	0	1		Q9JMH6	Thioredoxin reductase 1, cytoplasmic	-0.258373	-1.04075	0.309642	-0.163241	-0.099309	-0.66512	0.113434	-0.105008	0.17594	0.450063	-0.26453	0.202888
Q6P8J7	Creatine kinase S-type, mitochondrial	no	-0.051784	0.084221	-0.902717	-0.381103	-0.529276	-0.101714	-0.0738716	0.135697	-0.484911	-0.111317	0.860766	0.529486	0	Creatine kinase S-type, mitochondrial	-0.312846	-0.142291	0.219549	0.139452	0.540512	0	0	-0.170555	0	1		Q8C7G9		0.0911243	0.256373	-0.353616	-0.0728604	-0.375216	0.0384508	0.0897694	0.539163	-0.435788	-0.0792646	0.574828	0.69439
Q61578	NADPH:adrenodoxin oxidoreductase, mitochondrial	no	-0.229446	1.25661	-0.597051	0.426729	-0.114781	0.543551	-0.368423	-0.422243	0.154516	-0.55158	0.281227	-0.877881	0	NADPH:adrenodoxin oxidoreductase, mitochondrial	0.21421	-0.0904739	0.406892	0.221718	0.542065	0	0	0.304684	1	0		Q8VCT3	Aminopeptidase B	-0.0865381	1.42876	-0.0479498	0.734971	0.0392789	0.683715	-0.204782	-0.0187766	0.20364	-0.519528	-0.00471089	-0.712977
P19157	Glutathione S-transferase P 1;Glutathione S-transferase P 2	no	-0.23365	-0.507063	-0.858854	-0.509123	-0.672554	-0.872998	-0.356764	-0.636004	-0.485926	-0.283419	0.491831	-0.0788	0	Glutathione S-transferase P 1;Glutathione S-transferase P 2	-0.527173	-0.63458	0.128095	0.10625	0.543342	0	0	0.107408	1	0		Q07113	Cation-independent mannose-6-phosphate receptor	-0.0907415	-0.334911	-0.309753	-0.200881	-0.518494	-0.732834	-0.193123	-0.232538	-0.436803	-0.251367	0.205893	0.0861043
Q91ZE0	Trimethyllysine dioxygenase, mitochondrial	no	0.202034	0.755234	-0.92226	0.169722	-0.0533511	0.64191	0.0296892	0.630665	-0.120333	-0.0454299	0.747781	0.459618	0	Trimethyllysine dioxygenase, mitochondrial	0.0511826	0.312228	0.351199	0.187876	0.543635	0	0	-0.261046	0	1	Q5SXR6	Q9D8W5	26S proteasome non-ATPase regulatory subunit 12	0.344942	0.927387	-0.373159	0.477964	0.100709	0.782075	0.19333	1.03413	-0.071209	-0.0133779	0.461843	0.624522
Q9WTQ5	A-kinase anchor protein 12	no	0.0593528	-0.493734	0.377885	-0.919226	0.34562	-0.0705006	0.157132	-0.516633	0.243658	0.361254	-0.11524	0.362166	0	A-kinase anchor protein 12	-0.24393	-0.0210952	0.288251	0.185797	0.54383	0	0	-0.222835	0	1		Q9WV32	Actin-related protein 2/3 complex subunit 1B	0.202261	-0.321582	0.926986	-0.610984	0.49968	0.0696638	0.320773	-0.113167	0.292782	0.393306	-0.401178	0.52707
Q64737	Trifunctional purine biosynthetic protein adenosine-3;Phosphoribosylamine--glycine ligase;Phosphoribosylformylglycinamidine cyclo-ligase;Phosphoribosylglycinamide formyltransferase	no	-0.44925	-0.295288	-0.251382	-0.359266	-0.241517	-0.304436	0.451116	-0.632931	0.154266	-0.0149853	0.593133	-0.232888	0	Trifunctional purine biosynthetic protein adenosine-3;Phosphoribosylamine--glycine ligase;Phosphoribosylformylglycinamidine cyclo-ligase;Phosphoribosylglycinamide formyltransferase	-0.338796	-0.181942	0.0429663	0.227799	0.544164	0	0	-0.156854	0	1	Q9DC69	Q8R016	Bleomycin hydrolase	-0.306341	-0.123136	0.29772	-0.051024	-0.0874575	-0.164271	0.614757	-0.229465	0.203389	0.0170666	0.307195	-0.0679842
Q8K2C6	NAD-dependent protein deacylase sirtuin-5, mitochondrial	no	0.0325205	0.345289	-0.383029	-0.336528	-0.12083	0.04797	-0.316253	-0.487939	-0.166645	-0.448552	0.00495482	-0.286972	0	NAD-dependent protein deacylase sirtuin-5, mitochondrial	-0.0854369	-0.219263	0.171038	0.116439	0.544793	0	0	0.133826	1	0		Q7TSV4	Phosphoglucomutase-2	0.175429	0.517441	0.166073	-0.0282862	0.0332292	0.188134	-0.152612	-0.0844725	-0.117521	-0.4165	-0.280983	-0.122067
P51667	Myosin regulatory light chain 2, ventricular/cardiac muscle isoform	no	-0.627317	-1.55537		-0.600435	-0.147869	-1.10386		-0.702476	0.39151	0.321497		-0.12254	0	Myosin regulatory light chain 2, ventricular/cardiac muscle isoform	-0.927708	-0.651402	0.313928	0.27715	0.545951	0	0	-0.276306	0	1		Q64727	Vinculin	-0.484409	-1.38322		-0.292193	0.00619029	-0.963696		-0.29901	0.440633	0.353549		0.0423642
F6SJE0	Phosphatidylinositol transfer protein alpha isoform	no	0.249079	0.741037	0.821342	0.986497	0.203211	0.818593	0.548294	0.696956	-0.179679	0.001882	-0.335883	-0.301156	0	Phosphatidylinositol transfer protein alpha isoform	0.699489	0.566763	0.158592	0.133191	0.545973	0	0	0.132725	1	0		Q8BZA9	Probable fructose-2,6-bisphosphatase TIGAR	0.391988	0.913189	1.37044	1.29474	0.35727	0.958757	0.711935	1.10042	-0.130555	0.0339339	-0.621821	-0.136252
F6SY09	Alpha-2-macroglobulin receptor-associated protein	no	-0.00304595	-0.97571	-0.0791111		-1.05888	-1.02808	0.0731885		-1.02921	-0.0662418	0.10415		0	Alpha-2-macroglobulin receptor-associated protein	-0.352622	-0.671256	0.312317	0.372329	0.548857	0	0	0.318634	1	0		O35857	Mitochondrial import inner membrane translocase subunit TIM44	0.139862	-0.803558	0.46999		-0.904818	-0.887915	0.236829		-0.980085	-0.0341898	-0.181788
P16332	Methylmalonyl-CoA mutase, mitochondrial	no	-0.505901	0.0128135	-0.694036	-0.283682	-0.910586	-0.245977	-0.248112	-0.629111	-0.178668	-0.356471	0.447116	-0.408001	0	Methylmalonyl-CoA mutase, mitochondrial	-0.367701	-0.508446	0.152054	0.161488	0.549227	0	0	0.140745	1	0		Q9CPV4	Glyoxalase domain-containing protein 4	-0.362993	0.184966	-0.144935	0.0245605	-0.756526	-0.105812	-0.0844714	-0.225645	-0.129545	-0.324419	0.161178	-0.243096
P97450	ATP synthase-coupling factor 6, mitochondrial	no	-0.413656	-1.2371	-0.379689	-0.420475	0.887604	-1.26786	-0.283151	-0.507937	1.35622	-0.025718	0.194566	0.035349	0	ATP synthase-coupling factor 6, mitochondrial	-0.612731	-0.292837	0.208315	0.446326	0.54949	0	0	-0.319894	0	1		Q61033	Lamina-associated polypeptide 2, isoforms alpha/zeta;Lamina-associated polypeptide 2, isoforms beta/delta/epsilon/gamma	-0.270747	-1.06495	0.169412	-0.112233	1.04166	-1.1277	-0.11951	-0.104471	1.40534	0.00633395	-0.0913715	0.200253
Q8BKZ9	Pyruvate dehydrogenase protein X component, mitochondrial	no	-0.245792	-0.700923	-0.501144	-1.07632	0.573556	-0.656482	-0.290473	-1.11866	0.764401	0.120196	0.176828	0.00373773	0	Pyruvate dehydrogenase protein X component, mitochondrial	-0.631045	-0.373014	0.175225	0.358137	0.550039	0	0	-0.258031	0	1		Q9D020	Cytosolic 5-nucleotidase 3	-0.102884	-0.528771	0.0479571	-0.768078	0.727615	-0.516318	-0.126832	-0.71519	0.813525	0.152248	-0.10911	0.168642
Q9EQP2	EH domain-containing protein 4	no	-0.0542238	1.03864	0.646499	1.20678	-0.0913853	1.51219	0.625963	2.32812	0.0441662	0.510057	0.114375	1.07962	0	EH domain-containing protein 4	0.709426	1.09372	0.280308	0.526161	0.550088	0	0	-0.384297	0	1		P61979	Heterogeneous nuclear ribonucleoprotein K	0.0886844	1.2108	1.1956	1.51503	0.0626743	1.65236	0.789604	2.73159	0.0932897	0.542109	-0.171563	1.24452
Q06890	Clusterin;Clusterin beta chain;Clusterin alpha chain	no	0.333422	-0.233168	1.80108	0.641876	0.169022	-0.40428	0.944515	0.5284	-0.362941	0.0311749	-0.959397	-0.193609	0	Clusterin;Clusterin beta chain;Clusterin alpha chain	0.635804	0.309414	0.428609	0.285829	0.553055	0	0	0.32639	1	0		E9QP49	EH domain-binding protein 1-like protein 1	0.47633	-0.0610158	2.35019	0.950118	0.323082	-0.264116	1.10816	0.931866	-0.313818	0.0632269	-1.24534	-0.0287048
Q9DCW4	Electron transfer flavoprotein subunit beta	no	-0.57975	-0.804979	-1.02912	-0.937529	-0.618285	-1.13597	-0.597206	-1.75221	-0.00998512	-0.253154	0.410266	-0.7039	0	Electron transfer flavoprotein subunit beta	-0.837844	-1.02592	0.0975597	0.27227	0.553115	0	0	0.188075	1	0	E9QKR0	Q8BG05	Heterogeneous nuclear ribonucleoprotein A3	-0.436842	-0.632827	-0.480015	-0.629287	-0.464226	-0.99581	-0.433565	-1.34874	0.0391384	-0.221102	0.124328	-0.538995
Q8BH95	Enoyl-CoA hydratase, mitochondrial	no	-0.42923	-0.591799	-0.696799	-0.950343	-0.252766	-0.62981	-0.150429	-1.04529	0.158145	-0.0891133	0.600808	-0.125064	0	Enoyl-CoA hydratase, mitochondrial	-0.667043	-0.519574	0.109301	0.203303	0.553334	0	0	-0.147469	0	1		P70460	Vasodilator-stimulated phosphoprotein	-0.286322	-0.419647	-0.147698	-0.642101	-0.0987063	-0.489646	0.0132121	-0.641823	0.207268	-0.0570614	0.31487	0.0398403
Q9EPB4	Apoptosis-associated speck-like protein containing a CARD	no	0.126604	-0.174314	0.798565	-0.69185	-0.538907	-0.807194	1.08835	-1.17788	-0.739668	-0.689292	0.270141	-0.463098	0	Apoptosis-associated speck-like protein containing a CARD	0.0147511	-0.358908	0.311168	0.499887	0.553481	0	0	0.37366	1	0		P62827	GTP-binding nuclear protein Ran	0.269512	-0.00216244	1.34767	-0.383607	-0.384847	-0.667029	1.25199	-0.774418	-0.690544	-0.657241	-0.0157971	-0.298194
P80314	T-complex protein 1 subunit beta	no	0.495027	0.512722	0.449022	0.53951	-0.0247107	0.4294	-0.437158	1.13396	-0.645747	-0.19532	-0.844017	0.742909	0	T-complex protein 1 subunit beta	0.49907	0.275372	0.0190239	0.336482	0.554024	0	0	0.223698	1	0		Q91XH5	Sepiapterin reductase	0.637935	0.684874	0.998123	0.847752	0.129349	0.569565	-0.273518	1.53742	-0.596623	-0.163268	-1.12996	0.907814
Q6WVG3	BTB/POZ domain-containing protein KCTD12	no	0.112895		0.200905	-0.393395	0.0871705		0.161515	0.0623327	-0.0630549		-0.173003	0.543239	0	BTB/POZ domain-containing protein KCTD12	-0.0265318	0.103673	0.185183	0.0297967	0.556262	0	0	-0.130205	0	1		Q922B2	Aspartate--tRNA ligase, cytoplasmic	0.255803		0.750006	-0.0851526	0.24123		0.325156	0.465799	-0.0139313		-0.458941	0.708143
P63005	Platelet-activating factor acetylhydrolase IB subunit alpha	no	0.304089	0.847399	0.223376	0.305234	0.360744	0.774112	0.565542	0.409881	-0.0754168	-0.130527	0.259454	0.117239	0	Platelet-activating factor acetylhydrolase IB subunit alpha	0.420024	0.52757	0.143741	0.093053	0.556813	0	0	-0.107545	0	1		F8WH86	Transcription elongation factor B polypeptide 2	0.446997	1.01955	0.772477	0.613476	0.514804	0.914276	0.729183	0.813347	-0.0262933	-0.0984747	-0.0264843	0.282143
Q9D4E6	Polyadenylate-binding protein 1	no	0.176594	-0.0431914	1.58565	0.613066	0.0182998	0.0498615	0.0308244	1.11061	-0.202041	0.0118525	-1.37675	0.61633	0	Polyadenylate-binding protein 1	0.583029	0.3024	0.360958	0.269483	0.557996	0	0	0.280629	1	0		E9Q0H7	Prolyl endopeptidase	0.319502	0.128961	2.13475	0.921308	0.172359	0.190026	0.194465	1.51408	-0.152917	0.0439044	-1.66269	0.781234
Q91V41	Ras-related protein Rab-14	no		0.649535	0.88097	0.317937		1.19288	-0.142446	-0.163304		0.0181363	-0.875167	-0.229958	0	Ras-related protein Rab-14	0.616147	0.29571	0.163389	0.448625	0.558419	0	0	0.320438	1	0		D3Z576	Filamin-C		0.821687	1.43007	0.626179		1.33304	0.0211954	0.240162		0.0501883	-1.16111	-0.0650533
Q76MZ3	Serine/threonine-protein phosphatase 2A 65 kDa regulatory subunit A alpha isoform	no	-0.15716	0.0709271	0.407773	-0.336953	0.130455	0.299121	0.128552	-0.115578	0.306344	0.144399	-0.229109	0.0881168	0	Serine/threonine-protein phosphatase 2A 65 kDa regulatory subunit A alpha isoform	-0.00385313	0.110637	0.160594	0.0853487	0.559119	0	0	-0.11449	0	1		P07901	Heat shock protein HSP 90-alpha	-0.0142518	0.243079	0.956874	-0.0287106	0.284514	0.439285	0.292193	0.287888	0.355467	0.176451	-0.515047	0.253021
Q7TMK9	Heterogeneous nuclear ribonucleoprotein Q	no	0.348073	0.169367	0.88999	1.33904	1.83399	0.496272	-0.00672665	1.75252	1.62271	0.370234	-1.05538	0.453522	0	Heterogeneous nuclear ribonucleoprotein Q	0.686618	1.01901	0.266017	0.458949	0.559442	0	0	-0.332394	0	1		P19221	Prothrombin;Activation peptide fragment 1;Activation peptide fragment 2;Thrombin light chain;Thrombin heavy chain	0.490981	0.341519	1.43909	1.64729	1.98805	0.636436	0.156914	2.15598	1.67184	0.402286	-1.34132	0.618427
P52825	Carnitine O-palmitoyltransferase 2, mitochondrial	no	0.45078	1.2822	0.437856	1.49022	0.116888	1.29264	-0.27802	1.30937	-0.354966	-0.140819	-0.831912	-0.213063	0	Carnitine O-palmitoyltransferase 2, mitochondrial	0.915264	0.610219	0.275209	0.406904	0.56049	0	0	0.305045	1	0		Q01279	Epidermal growth factor receptor	0.593688	1.45435	0.986957	1.79847	0.270947	1.43281	-0.114379	1.71284	-0.305842	-0.108767	-1.11785	-0.0481586
P56391	Cytochrome c oxidase subunit 6B1	no	0.160434	-1.72993	-2.0803	-0.514385	0.183594	-1.62451	-0.785862	-0.334589	0.12771	0.146312	1.7803	0.138321	0	Cytochrome c oxidase subunit 6B1	-1.04105	-0.640341	0.522457	0.383201	0.560986	0	0	-0.400704	0	1		Q06890	Clusterin;Clusterin beta chain;Clusterin alpha chain	0.303342	-1.55778	-1.5312	-0.206143	0.337654	-1.48434	-0.622221	0.0688768	0.176833	0.178364	1.49436	0.303225
Q9CWJ9	Bifunctional purine biosynthesis protein PURH;Phosphoribosylaminoimidazolecarboxamide formyltransferase;IMP cyclohydrolase	no	0.224463	0.598235	0.130593	0.513317	0.0471979	0.674781	-0.200344	0.392042	-0.192831	0.0543242	-0.269056	-0.19598	0	Bifunctional purine biosynthesis protein PURH;Phosphoribosylaminoimidazolecarboxamide formyltransferase;IMP cyclohydrolase	0.366652	0.228419	0.112206	0.19207	0.562442	0	0	0.138233	1	0		Q99LX0	Protein DJ-1	0.367371	0.770387	0.679694	0.821559	0.201258	0.814945	-0.0367035	0.795509	-0.143707	0.0863761	-0.554994	-0.0310761
O70250	Phosphoglycerate mutase 2	no	-0.122566	0.561043	-0.451221	-0.00548223	-0.173903	0.131453	-0.242433	-0.317143	-0.0988194	-0.327304	0.351786	-0.279611	0	Phosphoglycerate mutase 2	-0.00455646	-0.150506	0.21082	0.0984323	0.562611	0	0	0.14595	1	0		Q9CY58	Plasminogen activator inhibitor 1 RNA-binding protein	0.0203421	0.733195	0.0978804	0.30276	-0.0198431	0.271618	-0.0787922	0.0863236	-0.0496959	-0.295252	0.065848	-0.114707
Q91VK1	Basic leucine zipper and W2 domain-containing protein 2	no	-0.181626	-0.0765783	-0.558785		-0.515105	-0.333873	-0.284986		-0.263699	-0.526263	0.861734		0	Basic leucine zipper and W2 domain-containing protein 2	-0.27233	-0.377988	0.146403	0.069996	0.563345	0	0	0.105658	1	0		Q9CPY7	Cytosol aminopeptidase	-0.0387175	0.0955737	-0.0096841		-0.361046	-0.193709	-0.121345		-0.214575	-0.494211	0.575796
O70251	Elongation factor 1-beta	no	-0.363926	-1.63274	-0.140933	-1.16726	-0.377147	-1.15316	0.183458	-0.846861	0.110118	0.483358	0.387319	0.253771	0	Elongation factor 1-beta	-0.826213	-0.548428	0.347624	0.291513	0.563468	0	0	-0.277785	0	1		E9QJT5	Acylphosphatase;Acylphosphatase-1	-0.221018	-1.46059	0.408168	-0.859015	-0.223087	-1.013	0.347099	-0.443395	0.159242	0.51541	0.101381	0.418676
Q8R2Q4	Ribosome-releasing factor 2, mitochondrial	no	0.112049	0.538958	-0.188568	0.268298	0.241771	0.542184	-0.311914	-0.4131	0.00815347	-0.150513	-0.391834	-0.692957	0	Ribosome-releasing factor 2, mitochondrial	0.182684	0.0147353	0.151954	0.22721	0.564645	0	0	0.167949	1	0		Q3URE1	Acyl-CoA synthetase family member 3, mitochondrial	0.254957	0.71111	0.360533	0.57654	0.395831	0.682349	-0.148273	-0.00963388	0.057277	-0.118461	-0.677772	-0.528053
P35385	Heat shock protein beta-7	no	-0.376966	-1.10436	1.05767	-0.505227	-0.0161627	-0.757651	0.642064	0.575651	0.320929	0.383923	-0.486666	0.419192	0	Heat shock protein beta-7	-0.232221	0.110975	0.458252	0.325148	0.566091	0	0	-0.343197	0	1		B9EHC7	Calsequestrin;Calsequestrin-2	-0.234058	-0.932212	1.60677	-0.196985	0.137897	-0.617487	0.805705	0.979117	0.370053	0.415975	-0.772604	0.584097
Q3THK7	GMP synthase [glutamine-hydrolyzing]	no	-0.655422	0.0817587	-0.0766134	-0.521994	-0.415629	0.261775	0.0153605	-0.440638	0.250004	0.123438	0.112456	0.150546	0	GMP synthase [glutamine-hydrolyzing]	-0.293068	-0.144783	0.175844	0.171227	0.567875	0	0	-0.148285	0	1		Q62422	Osteoclast-stimulating factor 1	-0.512514	0.253911	0.472488	-0.213752	-0.261569	0.40194	0.179001	-0.0371714	0.299127	0.15549	-0.173482	0.31545
P70296	Phosphatidylethanolamine-binding protein 1;Hippocampal cholinergic neurostimulating peptide	no	-0.0403174	-1.42983	-0.89115	-1.14344	-0.143566	-1.28447	0.0719636	-1.06339	-0.268797	0.1528	0.855332	0.102691	0	Phosphatidylethanolamine-binding protein 1;Hippocampal cholinergic neurostimulating peptide	-0.876183	-0.604866	0.299561	0.33454	0.568102	0	0	-0.271317	0	1		Q9D0M5	Dynein light chain 2, cytoplasmic;Dynein light chain 1, cytoplasmic	0.102591	-1.25767	-0.342049	-0.835197	0.0104934	-1.14431	0.235604	-0.659925	-0.219673	0.184852	0.569394	0.267596
F6XUP5	Ubiquitin-fold modifier 1	no	0.381356	-1.19761	0.560928	-0.800659	-0.247923	-0.882774	-0.0953142	-1.02771	-0.543802	0.201836	-0.288431	-0.281831	0	Ubiquitin-fold modifier 1	-0.263995	-0.56343	0.433649	0.230256	0.571009	0	0	0.299434	1	0		E9PXE5	Dystonin	0.524264	-1.02545	1.11003	-0.492417	-0.0938637	-0.74261	0.0683268	-0.624241	-0.494678	0.233888	-0.574369	-0.116927
Q8BGC4	Zinc-binding alcohol dehydrogenase domain-containing protein 2	no	0.00504965	0.454628	-0.74955	0.414559	-0.244187	0.197211	-0.499868	-0.097446	-0.147598	-0.186205	0.31691	-0.317741	0	Zinc-binding alcohol dehydrogenase domain-containing protein 2	0.0311718	-0.161073	0.279361	0.145518	0.57104	0	0	0.192244	1	0		Q99KR3	Beta-lactamase-like protein 2	0.147958	0.62678	-0.200448	0.722801	-0.0901271	0.337375	-0.336227	0.30602	-0.0984747	-0.154153	0.0309717	-0.152837
E9PV24	0	no	-1.18962	1.25645	0.55228	0.999581	-0.542623	0.0920283	0.323228	0.294408	0.63057	-1.32697	-0.462785	-0.719686	0	0	0.404673	0.0417603	0.550984	0.201471	0.571425	0	0	0.362913	1	0		F8VQJ3	Laminin subunit gamma-1	-1.04671	1.4286	1.10138	1.30782	-0.388563	0.232193	0.486869	0.697874	0.679694	-1.29492	-0.748723	-0.554782
E9Q3A4	Proteasome subunit alpha type;Proteasome subunit alpha type-2	no	0.443688	0.902152	0.110001	0.666616	0.267312	0.581589	0.119095	0.64889	-0.0694787	0.0150676	-0.113088	0.122923	0	Proteasome subunit alpha type;Proteasome subunit alpha type-2	0.530614	0.404222	0.168574	0.126281	0.572078	0	0	0.126393	1	0		P13707	Glycerol-3-phosphate dehydrogenase [NAD(+)], cytoplasmic	0.586597	1.0743	0.659103	0.974858	0.421372	0.721754	0.282736	1.05236	-0.0203551	0.0471196	-0.399026	0.287827
Q6PHQ9	0	no	0.521393		0.148495	0.365151	1.05271		0.14763	0.395176	0.684144		-0.258876	0.0328354	0	0	0.345013	0.531838	0.108116	0.270061	0.572356	0	0	-0.186825	0	1		O54988	STE20-like serine/threonine-protein kinase	0.664301		0.697596	0.673394	1.20677		0.311271	0.798642	0.733267		-0.544813	0.19774
O55234	Proteasome subunit beta type-5	no	0.334769	0.402818	-0.277078	0.640734	0.596204	0.601691	-0.222084	0.854303	0.0770564	0.320142	0.189933	0.0339669	0	Proteasome subunit beta type-5	0.275311	0.457528	0.195461	0.234399	0.572985	0	0	-0.182217	0	1		O09174	Alpha-methylacyl-CoA racemase	0.477677	0.574971	0.272023	0.948976	0.750263	0.741855	-0.0584429	1.25777	0.12618	0.352193	-0.0960054	0.198871
Q9CR68	Cytochrome b-c1 complex subunit Rieske, mitochondrial;Cytochrome b-c1 complex subunit 11	no	-0.834268	-1.65443	-1.74796	-0.267063	-0.305951	-1.23366	-1.45118	-0.430195	0.439289	0.236382	0.409207	-0.00514597	0	Cytochrome b-c1 complex subunit Rieske, mitochondrial;Cytochrome b-c1 complex subunit 11	-1.12593	-0.855245	0.352249	0.285879	0.573426	0	0	-0.270685	0	1		Q9D154	Leukocyte elastase inhibitor A	-0.69136	-1.48228	-1.19886	0.0411796	-0.151891	-1.09349	-1.28754	-0.0267293	0.488412	0.268434	0.123269	0.159758
Q9EQ20	Methylmalonate-semialdehyde dehydrogenase [acylating], mitochondrial	no	-0.292029	0.10215	-0.912725	-0.539797	-0.391736	-0.377239	-0.39758	-1.16117	-0.141894	-0.410227	0.443628	-0.620102	0	Methylmalonate-semialdehyde dehydrogenase [acylating], mitochondrial	-0.4106	-0.581932	0.213267	0.193127	0.573483	0	0	0.171332	1	0		Q3TC72	Fumarylacetoacetate hydrolase domain-containing protein 2A	-0.149121	0.274303	-0.363624	-0.231555	-0.237677	-0.237074	-0.233939	-0.757706	-0.0927709	-0.378175	0.157691	-0.455198
Q99LP6	GrpE protein homolog 1, mitochondrial	no	-0.224003	-1.30064	-0.176372	-1.25767	-0.554056	-1.80073	-0.234577	-1.52965	-0.38324	-0.368425	-0.0455072	-0.289171	0	GrpE protein homolog 1, mitochondrial	-0.739671	-1.02975	0.311746	0.376706	0.575411	0	0	0.290081	1	0	A2A5Y6	E9QPU9	Cordon-bleu protein-like 1	-0.0810948	-1.12849	0.372729	-0.949423	-0.399997	-1.66056	-0.0709362	-1.12618	-0.334116	-0.336373	-0.331445	-0.124267
O88342	WD repeat-containing protein 1	no	0.602716	0.887042	0.321717	0.49757	0.237928	1.13011	0.355599	1.2953	-0.36131	0.169707	0.165895	0.640966	0	WD repeat-containing protein 1	0.577261	0.754734	0.118415	0.267631	0.575985	0	0	-0.177473	0	1		O35386	Phytanoyl-CoA dioxygenase, peroxisomal	0.745625	1.05919	0.870818	0.805812	0.391988	1.27028	0.51924	1.69876	-0.312187	0.201759	-0.120043	0.80587
Q9D020	Cytosolic 5-nucleotidase 3	no	-0.105877	-0.665594	-0.540327	-0.900017	-0.304333	-0.832056	-0.435346	-1.30473	-0.224022	-0.317987	0.100267	-0.310653	0	Cytosolic 5-nucleotidase 3	-0.552954	-0.719116	0.166628	0.225142	0.576471	0	0	0.166162	1	0		Q62261	Spectrin beta chain, brain 1	0.0370308	-0.493442	0.00877379	-0.591775	-0.150273	-0.691891	-0.271705	-0.901263	-0.174898	-0.285935	-0.185671	-0.145749
Q9ERE7	LDLR chaperone MESD	no	-0.374796	-0.31659	0.205188	-0.652048	-0.225072	-0.809191	-0.00220475	-0.724702	0.0255189	-0.0577429	-0.386099	-0.15112	0	LDLR chaperone MESD	-0.284562	-0.440292	0.178901	0.194768	0.577586	0	0	0.155731	1	0		Q80XN0	D-beta-hydroxybutyrate dehydrogenase, mitochondrial	-0.231888	-0.144438	0.754289	-0.343806	-0.071012	-0.669027	0.161436	-0.321235	0.0746424	-0.025691	-0.672037	0.0137839
F8VQJ3	Laminin subunit gamma-1	no	-1.25635	-2.175	-0.503658	-1.13435	-1.19595	-1.53177	0.133727	-1.28019	-0.0109683	0.631611	0.650958	-0.14798	0	Laminin subunit gamma-1	-1.26734	-0.968545	0.344584	0.374284	0.578551	0	0	-0.298794	0	1		Q9CQQ7	ATP synthase subunit b, mitochondrial	-1.11344	-2.00285	0.0454429	-0.826111	-1.04189	-1.3916	0.297368	-0.876723	0.0381553	0.663663	0.365021	0.0169242
Q9Z1Q9	Valine--tRNA ligase	no	0.229375	1.11852	0.046307	0.847453	0.550901	1.42086	0.0772229	1.11222	0.441036	0.129642	-0.190059	0.267841	0	Valine--tRNA ligase	0.560414	0.790302	0.252944	0.298193	0.578583	0	0	-0.229887	0	1		Q62048	Astrocytic phosphoprotein PEA-15	0.372283	1.29067	0.595408	1.15569	0.70496	1.56103	0.240864	1.51569	0.490159	0.161694	-0.475996	0.432746
Q8BJU0	Small glutamine-rich tetratricopeptide repeat-containing protein alpha	no	-0.256616	-1.32187	-0.130102	-0.807922	-0.158626	-0.9944	0.168981	-0.64957	0.329721	0.3224	0.444792	0.170579	0	Small glutamine-rich tetratricopeptide repeat-containing protein alpha	-0.629127	-0.408404	0.273808	0.257765	0.578712	0	0	-0.220723	0	1		Q9CQI6	Coactosin-like protein	-0.113707	-1.14972	0.419	-0.49968	-0.00456613	-0.854235	0.332622	-0.246104	0.378844	0.354452	0.158854	0.335483
P58771	Tropomyosin alpha-1 chain	no	-0.457551	-2.03121	-0.516295	-0.834712	-1.9367	-1.49766	-0.727991	-0.780534	-1.5151	0.541904	-0.0986081	0.0276686	0	Tropomyosin alpha-1 chain	-0.959941	-1.23572	0.366573	0.292258	0.578847	0	0	0.275781	1	0	O08529	E9Q5L3	Short/branched chain specific acyl-CoA dehydrogenase, mitochondrial	-0.314643	-1.85905	0.0328061	-0.52647	-1.78265	-1.3575	-0.56435	-0.377068	-1.46598	0.573956	-0.384546	0.192573
F6YBI4	EH domain-containing protein 1	no	-0.103489	0.88212	0.749968	1.27241	-0.0652395	0.821034	1.82989	1.40033	0.00967778	-0.0644406	1.13514	0.178788	0	EH domain-containing protein 1	0.700253	0.996503	0.289959	0.409847	0.578959	0	0	-0.29625	0	1		Q9R0P3	S-formylglutathione hydrolase	0.0394191	1.05427	1.29907	1.58065	0.0888201	0.961199	1.99353	1.8038	0.0588013	-0.0323887	0.849199	0.343692
P17182	Alpha-enolase;Enolase	no	0.286199	0.559557	0.34154	-0.340625	-0.000902826	0.605919	-0.0389158	-0.37892	-0.240912	-0.0209858	-0.288646	-0.0165559	0	Alpha-enolase;Enolase	0.211668	0.046795	0.193321	0.204832	0.5797	0	0	0.164873	1	0		P40124	Adenylyl cyclase-associated protein 1	0.429107	0.731709	0.890641	-0.0323829	0.153157	0.746083	0.124725	0.0245459	-0.191788	0.0110662	-0.574584	0.148348
Q60631	Growth factor receptor-bound protein 2	no	-0.00134475	-1.56144	-0.953521	-0.916484	-0.325656	-1.52902	-0.105809	-0.418535	-0.313237	0.219516	0.69834	0.369456	0	Growth factor receptor-bound protein 2	-0.858198	-0.594754	0.321615	0.318248	0.581602	0	0	-0.263444	0	1		P36552	Coproporphyrinogen-III oxidase, mitochondrial	0.141564	-1.38929	-0.40442	-0.608241	-0.171596	-1.38885	0.0578315	-0.0150693	-0.264114	0.251568	0.412402	0.534361
Q9WUR2	Enoyl-CoA delta isomerase 2, mitochondrial	no	-0.411169	-0.295288	-1.32865	-0.337801	-0.150889	-0.394637	-0.462491	-0.716364	0.179972	-0.112872	0.664117	-0.330646	0	Enoyl-CoA delta isomerase 2, mitochondrial	-0.593226	-0.431095	0.246306	0.116264	0.581763	0	0	-0.162131	0	1		Q6NZJ6	Eukaryotic translation initiation factor 4 gamma 1	-0.268261	-0.123136	-0.779546	-0.0295589	0.00317045	-0.254473	-0.29885	-0.312897	0.229096	-0.0808201	0.378179	-0.165742
E9QA63	Microtubule-actin cross-linking factor 1	no	-0.75981		-1.04922	-0.356339	-0.62747		-0.66443	-0.474954	0.250121		0.374894	-0.272801	0	Microtubule-actin cross-linking factor 1	-0.721788	-0.588951	0.200918	0.0579886	0.582038	0	0	-0.132837	0	1		P50396	Rab GDP dissociation inhibitor alpha	-0.616901		-0.500116	-0.0480967	-0.47341		-0.500789	-0.0714881	0.299245		0.0889556	-0.107897
Q8BWF0	Succinate-semialdehyde dehydrogenase, mitochondrial	no	-0.0316099	0.311712	-0.795462	-0.523734	-0.268829	-0.180846	-0.387823	-0.891673	-0.170673	-0.476569	0.535929	-0.42933	0	Succinate-semialdehyde dehydrogenase, mitochondrial	-0.259774	-0.432293	0.247537	0.15889	0.582468	0	0	0.172519	1	0		Q99L45	Eukaryotic translation initiation factor 2 subunit 2	0.111298	0.483864	-0.246361	-0.215492	-0.114769	-0.040682	-0.224183	-0.488206	-0.121549	-0.444518	0.249991	-0.264426
Q8VCA8	Secernin-2	no	0.0958785	0.670597	-0.487809	0.0803589	0.0268521	0.521679	-0.50904	-0.463237	-0.042646	-0.247481	0.0222744	-0.196629	0	Secernin-2	0.0897565	-0.105936	0.236482	0.241814	0.583929	0	0	0.195693	1	0		Q9R0P9	Ubiquitin carboxyl-terminal hydrolase isozyme L1	0.238787	0.842749	0.0612924	0.388601	0.180912	0.661844	-0.3454	-0.0597706	0.00647761	-0.215429	-0.263663	-0.0317248
P47791	Glutathione reductase, mitochondrial	no	-0.254167	0.0354923	0.0290163	-0.0861983	-0.0298638	-0.0715147	-0.187761	-0.169154	0.153388	0.102957	-0.300836	-0.0604335	0	Glutathione reductase, mitochondrial	-0.0689642	-0.114573	0.067767	0.0380408	0.584223	0	0	0.0456092	1	0		P47199	Quinone oxidoreductase	-0.111259	0.207644	0.578117	0.222044	0.124196	0.0686497	-0.0241204	0.234313	0.202512	0.135009	-0.586774	0.104471
Q8JZN5	Acyl-CoA dehydrogenase family member 9, mitochondrial	no	-0.269394	-0.00828626	-0.468444	-0.358012	-0.238133	0.177316	-0.261946	-0.410949	0.0098163	0.146822	0.313941	-0.0450834	0	Acyl-CoA dehydrogenase family member 9, mitochondrial	-0.276034	-0.183428	0.0980964	0.126181	0.584627	0	0	-0.0926062	0	1		Q9D273	Cob(I)yrinic acid a,c-diamide adenosyltransferase, mitochondrial	-0.126486	0.163866	0.0806577	-0.0497701	-0.0840738	0.317481	-0.0983047	-0.00748262	0.0589399	0.178874	0.0280033	0.119821
F8WI94	Sarcoplasmic/endoplasmic reticulum calcium ATPase 2	no	0.124448	0.819533	1.79342	1.38673	1.20546	0.995073	1.12908	1.73152	1.02401	0.0547319	-0.653323	0.316808	0	Sarcoplasmic/endoplasmic reticulum calcium ATPase 2	1.03103	1.26528	0.362215	0.161379	0.585404	0	0	-0.234249	0	1		Q8K3C3	Protein LZIC	0.267356	0.991685	2.34253	1.69497	1.35952	1.13524	1.29272	2.13498	1.07313	0.0867838	-0.939261	0.481712
Q9D404	3-oxoacyl-[acyl-carrier-protein] synthase, mitochondrial	no	-0.255929	-0.520838	-0.519542	-0.412176	-0.232974	-0.44339	-0.10304	-0.623177	-0.0432207	-0.187972	0.404829	-0.176492	0	3-oxoacyl-[acyl-carrier-protein] synthase, mitochondrial	-0.427121	-0.350645	0.0624864	0.114757	0.585686	0	0	-0.0764762	0	1		P60843	Eukaryotic initiation factor 4A-I	-0.113021	-0.348686	0.0295589	-0.103934	-0.0789141	-0.303225	0.0606008	-0.219711	0.00590291	-0.15592	0.118891	-0.011588
O08677	Kininogen-1;Kininogen-1 heavy chain;Bradykinin;Kininogen-1 light chain	no	-0.00173705	-0.574001	1.28795	-0.146492	0.271292	-0.805648	0.497105	-0.572365	0.235509	-0.255796	-0.556501	-0.449134	0	Kininogen-1;Kininogen-1 heavy chain;Bradykinin;Kininogen-1 light chain	0.141431	-0.152404	0.401015	0.316817	0.587302	0	0	0.293835	1	0		Q9DAR7	m7GpppX diphosphatase	0.141171	-0.401849	1.83706	0.16175	0.425352	-0.665484	0.660746	-0.168899	0.284633	-0.223744	-0.842439	-0.28423
F8WGX5	DmX-like protein 1	no		-0.945473	-1.30076	-0.41043		-0.929101	-0.434841	-0.757693		-0.128535	1.36311	-0.51045	0	DmX-like protein 1	-0.885555	-0.707211	0.258757	0.144896	0.588228	0	0	-0.178343	0	1		Q9WUL7	ADP-ribosylation factor-like protein 3		-0.773321	-0.75166	-0.102188		-0.788936	-0.2712	-0.354226		-0.0964835	1.07717	-0.345546
Q9CQ65	S-methyl-5-thioadenosine phosphorylase	no		0.790733	0.000321458	-0.29399		1.16391	0.093249	0.0904803		0.212104	0.0818544	0.316705	0	S-methyl-5-thioadenosine phosphorylase	0.165688	0.449214	0.323865	0.35735	0.588478	0	0	-0.283526	0	1		Q99KQ4	Nicotinamide phosphoribosyltransferase		0.962885	0.549423	0.0142518		1.30408	0.25689	0.493947		0.244156	-0.204084	0.481609
Q9D273	Cob(I)yrinic acid a,c-diamide adenosyltransferase, mitochondrial	no	-0.136431		-0.830014	-0.84529	-0.449613		-0.684307	-1.27365	-0.174083		0.207252	-0.2823	0	Cob(I)yrinic acid a,c-diamide adenosyltransferase, mitochondrial	-0.603912	-0.802524	0.233782	0.245114	0.589197	0	0	0.198613	1	0		P56399	Ubiquitin carboxyl-terminal hydrolase 5;Ubiquitin carboxyl-terminal hydrolase	0.00647761		-0.280913	-0.537048	-0.295553		-0.520666	-0.870187	-0.124959		-0.0786856	-0.117396
Q02819	Nucleobindin-1	no	-0.217304	-0.888572	0.49123	-0.208361	-0.430056	-0.989123	0.0624977	-0.281352	-0.169967	-0.0124212	-0.286048	-0.0203358	0	Nucleobindin-1	-0.205752	-0.409508	0.281687	0.219011	0.589913	0	0	0.203756	1	0		Q9Z0J0	Epididymal secretory protein E1	-0.0743955	-0.71642	1.04033	0.0998809	-0.275996	-0.848958	0.226139	0.122114	-0.120843	0.0196308	-0.571986	0.144568
Q8C845	EF-hand domain-containing protein D2	no	-1.53838	1.22059	1.81227	0.543461	-0.531392	0.516598	-0.0528768	0.302198	0.908568	-0.637889	-2.212	-0.0254348	0	EF-hand domain-containing protein D2	0.509486	0.0586321	0.730174	0.22906	0.590863	0	0	0.450854	1	0		E9Q9M1	Cytosolic purine 5-nucleotidase	-1.39547	1.39274	2.36137	0.851704	-0.377332	0.656763	0.110764	0.705665	0.957692	-0.605837	-2.49793	0.139469
E9Q7L0	0	no	-0.0189773	2.91626	-0.858622		0.412317	2.05697	-4.4434		0.508654	-1.13858	-3.52064		0	0	0.679552	-0.658037	1.14432	1.95132	0.593164	1	1	1.33759	1	0		P47738	Aldehyde dehydrogenase, mitochondrial	0.123931	3.08841	-0.30952		0.566377	2.19714	-4.27976		0.557778	-1.10653	-3.80658
P14824	Annexin A6	no	0.163121	-0.269763	-0.0814044	-0.56646	-0.426793	-0.421002	-0.00130205	-0.323409	-0.637827	-0.212825	0.0189278	0.203585	0	Annexin A6	-0.188627	-0.293126	0.153992	0.100124	0.593315	0	0	0.1045	1	0		P06330	Ig heavy chain V region AC38 205.12;Ig heavy chain V region MOPC 104E;Ig heavy chain V region J558	0.306029	-0.0976109	0.467697	-0.258217	-0.272733	-0.280838	0.162339	0.0800574	-0.588704	-0.180773	-0.26701	0.368489
Q8CBU2	Deoxyguanosine kinase, mitochondrial;Deoxycytidine kinase	no	-0.107003	0.101331	-0.599365	0.602938	-0.139133	-0.316232	-0.271569	0.108224	-0.191111	-0.388694	0.526924	-0.364209	0	Deoxyguanosine kinase, mitochondrial;Deoxycytidine kinase	-0.000524768	-0.154677	0.24908	0.09536	0.595309	0	0	0.154152	1	0		P46638	Ras-related protein Rab-11B;Ras-related protein Rab-11A	0.0359054	0.273483	-0.0502634	0.91118	0.0149266	-0.176067	-0.107928	0.511691	-0.141987	-0.356642	0.240986	-0.199305
P21300	Aldose reductase-related protein 1	no	-0.0389743		-0.927408	-0.0315123	-0.0470413		-0.223993	-0.16579	-0.039633		0.771262	-0.103888	0	Aldose reductase-related protein 1	-0.332632	-0.145608	0.297396	0.0520687	0.59557	0	0	-0.187024	0	1		Q9Z0P4	Paralemmin-1	0.103934		-0.378307	0.27673	0.107018		-0.0603522	0.237677	0.00949053		0.485324	0.0610158
Q9JJU8	SH3 domain-binding glutamic acid-rich-like protein	no	0.400984	-0.91295	0.764261	-0.289116	0.114854	-0.850249	0.135955	-0.435003	-0.269368	0.123568	-0.587935	-0.0652725	0	SH3 domain-binding glutamic acid-rich-like protein	-0.00920536	-0.258611	0.372112	0.237401	0.596018	0	0	0.249405	1	0		E9Q120	Lon protease homolog;Lon protease homolog, mitochondrial	0.543892	-0.740798	1.31336	0.0191265	0.268913	-0.710085	0.299596	-0.0315363	-0.220244	0.15562	-0.873873	0.0996318
Q8R001	Microtubule-associated protein RP/EB family member 2	no	-0.170377	-0.318416	-0.892889	0.0781509	-0.638266	-0.0965929	-0.368389	0.52403	-0.43431	0.254829	0.525947	0.467922	0	Microtubule-associated protein RP/EB family member 2	-0.325883	-0.144805	0.205948	0.248857	0.596071	0	0	-0.181078	0	1		Q9DB20	ATP synthase subunit O, mitochondrial	-0.0274691	-0.146264	-0.343787	0.386393	-0.484207	0.0435716	-0.204748	0.927496	-0.385186	0.286881	0.240009	0.632827
Q99L13	3-hydroxyisobutyrate dehydrogenase, mitochondrial	no	-0.0677179	0.653058	-0.426627	-0.575598	-0.126481	0.271012	-0.362019	-1.07991	-0.0916546	-0.589825	-0.0163595	-0.524283	0	3-hydroxyisobutyrate dehydrogenase, mitochondrial	-0.104221	-0.32435	0.274005	0.283711	0.596992	0	0	0.220129	1	0		O88712	C-terminal-binding protein 1	0.0751904	0.82521	0.122474	-0.267356	0.0275787	0.411176	-0.198378	-0.676448	-0.0425311	-0.557773	-0.302297	-0.359379
Q9R0P9	Ubiquitin carboxyl-terminal hydrolase isozyme L1	no	0.826251	-0.155961	1.41917	-0.0822552	0.848966	0.359972	0.925043	0.795359	-0.115642	0.515595	-0.57365	0.776503	0	Ubiquitin carboxyl-terminal hydrolase isozyme L1	0.501802	0.732335	0.378661	0.12694	0.597359	0	0	-0.230533	0	1		Q7TSZ0	Stress-70 protein, mitochondrial	0.96916	0.016191	1.96827	0.225987	1.00303	0.500136	1.08868	1.19883	-0.066518	0.547647	-0.859588	0.941407
P85094	Isochorismatase domain-containing protein 2A, mitochondrial	no	-0.254073	0.239965	-1.26435	-0.505353	-0.472476	-0.235616	-0.822999	-1.07476	-0.237866	-0.459259	0.4833	-0.577943	0	Isochorismatase domain-containing protein 2A, mitochondrial	-0.445953	-0.651463	0.313662	0.185645	0.597825	0	0	0.20551	1	0		P16125	L-lactate dehydrogenase B chain;L-lactate dehydrogenase	-0.111165	0.412117	-0.715249	-0.19711	-0.318416	-0.0954519	-0.659358	-0.671293	-0.188743	-0.427207	0.197362	-0.413038
Q9DB77	Cytochrome b-c1 complex subunit 2, mitochondrial	no	0.0606061	0.210643	-1.81393	0.911902	1.03731	0.365389	-1.45499	1.31615	0.923937	0.336884	0.284018	0.314844	0	Cytochrome b-c1 complex subunit 2, mitochondrial	-0.157693	0.315966	0.582413	0.623125	0.598834	0	0	-0.47366	0	1		P05201	Aspartate aminotransferase, cytoplasmic	0.203514	0.382796	-1.26482	1.22014	1.19137	0.505554	-1.29134	1.71961	0.97306	0.368936	-0.00192009	0.479748
Q99KR7	Peptidyl-prolyl cis-trans isomerase F, mitochondrial	no	-0.251085	-1.0295	-0.961659	-0.930704	-0.119703	-1.05626	-0.25772	-1.05359	0.0988343	0.0920115	0.754261	-0.127733	0	Peptidyl-prolyl cis-trans isomerase F, mitochondrial	-0.793236	-0.621817	0.181891	0.251636	0.60272	0	0	-0.171419	0	1		O89053	Coronin-1A	-0.108176	-0.857344	-0.412558	-0.622462	0.0343565	-0.916094	-0.0940793	-0.650121	0.147958	0.124063	0.468323	0.0371714
E9QMV2	Costars family protein ABRACL	no	0.3723	-1.00896	0.456874	-1.01947	-0.154608	-1.10955	-0.329949	-0.640908	-0.259403	-0.20783	-0.271177	0.261092	0	Costars family protein ABRACL	-0.299816	-0.558752	0.412827	0.209325	0.602863	0	0	0.258936	1	0		Q8K411	Presequence protease, mitochondrial	0.515208	-0.836813	1.00598	-0.711231	-0.000548299	-0.969381	-0.166308	-0.237441	-0.210279	-0.175778	-0.557115	0.425996
P62334	26S protease regulatory subunit 10B	no	-0.351636	0.805743		1.80998	1.02711	1.11409		1.27096	1.48489	-0.139187		-0.672015	0	26S protease regulatory subunit 10B	0.754697	1.13739	0.624528	0.0713524	0.603208	0	0	-0.38269	0	1		Q8BPD5	Apolipoprotein A-I;Truncated apolipoprotein A-I	-0.208728	0.977895		2.11823	1.18117	1.25425		1.67443	1.53401	-0.107135		-0.507111
Q8BTM8	Filamin-A	no	0.928099	0.152466	1.01805	-0.336104	0.75859	1.03521	0.00961435	0.81883	-0.297986	0.877836	-1.07252	1.15344	0	Filamin-A	0.440629	0.65556	0.323702	0.223355	0.606818	0	0	-0.214931	0	1		Q99L47	Hsc70-interacting protein	1.07101	0.324618	1.56716	-0.0278618	0.91265	1.17537	0.173255	1.2223	-0.248862	0.909888	-1.35845	1.31835
P50516	V-type proton ATPase catalytic subunit A	no	0.145509	1.14733	0.904864	1.21551	0.143191	1.10367	0.721855	0.757864	0.134585	-0.145182	-0.344635	-0.670499	0	V-type proton ATPase catalytic subunit A	0.853302	0.681644	0.245166	0.199052	0.607125	0	0	0.171658	1	0	Q9JM76	Q6ZWZ6	40S ribosomal protein S12	0.288418	1.31948	1.45396	1.52375	0.29725	1.24383	0.885496	1.16133	0.183709	-0.11313	-0.630573	-0.505595
Q9DAR7	m7GpppX diphosphatase	no	0.112895	0.893641	0.177904	-0.131763	0.0998087	0.649147	0.00204595	-0.347455	0.0437603	-0.0869837	-0.0754229	-0.0899878	0	m7GpppX diphosphatase	0.263169	0.100887	0.220477	0.206432	0.610473	0	0	0.162282	1	0		Q8K2C6	NAD-dependent protein deacylase sirtuin-5, mitochondrial	0.255803	1.06579	0.727005	0.176479	0.253868	0.789312	0.165687	0.0560112	0.0928839	-0.0549317	-0.361361	0.0749164
Q8BTY1	Kynurenine--oxoglutarate transaminase 1	no	0.00517995	0.634543	-1.1776	0.343593	-0.158148	0.802891	0.0729436	0.0674025	0.148742	-0.126316	1.05198	-0.084656	0	Kynurenine--oxoglutarate transaminase 1	-0.0485704	0.196272	0.397705	0.209248	0.611529	0	0	-0.244843	0	1		Q8VDC3	Cytoplasmic aconitate hydratase	0.148088	0.806695	-0.628497	0.651836	-0.00408866	0.943056	0.236585	0.470869	0.197865	-0.094264	0.766044	0.0802483
Q11011	Puromycin-sensitive aminopeptidase	no	-0.127839	0.379158	-0.400883	-0.474701	-0.00362993	0.432852	0.0415013	-0.510083	0.135474	-0.0703842	0.379363	-0.0415029	0	Puromycin-sensitive aminopeptidase	-0.156066	-0.00983985	0.193375	0.193411	0.612114	0	0	-0.146226	0	1		Q9DB60	Prostamide/prostaglandin F synthase	0.0150693	0.551311	0.148218	-0.166458	0.15043	0.573016	0.205142	-0.106616	0.184598	-0.0383323	0.093425	0.123401
B9EIE8	LYR motif-containing protein 7	no	-0.505252	-1.2699		-1.32631	-0.560907	-1.80296		-1.49486	-0.158622	-0.609345		-0.24362	0	LYR motif-containing protein 7	-1.03382	-1.28624	0.264785	0.373415	0.613712	0	0	0.252425	1	0		P45952	Medium-chain specific acyl-CoA dehydrogenase, mitochondrial	-0.362343	-1.09775		-1.01806	-0.406847	-1.6628		-1.09139	-0.109499	-0.577293		-0.078716
Q9DB60	Prostamide/prostaglandin F synthase	no	0.116635	0.734748	0.412522	1.24493	0.611305	0.627224	-0.854884	1.08318	0.357848	-0.0579338	-1.20695	-0.237114	0	Prostamide/prostaglandin F synthase	0.627209	0.366707	0.241509	0.421636	0.615886	0	0	0.260501	1	0		P17751	Triosephosphate isomerase	0.259544	0.9069	0.961623	1.55317	0.765365	0.767388	-0.691243	1.48665	0.406972	-0.0258819	-1.49289	-0.0722098
P26516	26S proteasome non-ATPase regulatory subunit 7	no	-0.0877126	0.749457	0.173015	0.108374	0.57373	0.660839	-0.121697	0.361419	0.626512	-0.162102	-0.178288	0.291902	0	26S proteasome non-ATPase regulatory subunit 7	0.235783	0.368573	0.179973	0.175101	0.615917	0	0	-0.13279	0	1	P24549	O35206	Collagen alpha-1(XV) chain;Endostatin	0.0551957	0.921609	0.722116	0.416616	0.72779	0.801003	0.0419438	0.764886	0.675635	-0.13005	-0.464226	0.456806
D3Z576	Filamin-C	no	0.14125	-0.69792	0.687545	-0.487626	-0.00168143	-0.12549	0.539637	-0.0261155	0.0326251	0.599192	-0.0270731	0.383828	0	Filamin-C	-0.0891877	0.0965875	0.314341	0.15009	0.620191	0	0	-0.185775	0	1		Q99MN9	Propionyl-CoA carboxylase beta chain, mitochondrial	0.284159	-0.525768	1.23665	-0.179384	0.152378	0.0146744	0.703278	0.377351	0.0817487	0.631244	-0.313011	0.548733
P10833	Ras-related protein R-Ras	no	-0.042738	-0.858316	0.471099		-0.644171	-0.93277	0.290746		-0.551792	-0.0409519	-0.313874		0	Ras-related protein R-Ras	-0.143319	-0.428732	0.38705	0.36926	0.621986	0	0	0.285413	1	0		P14152	Malate dehydrogenase, cytoplasmic	0.10017	-0.686164	1.0202		-0.490112	-0.792605	0.454387		-0.502669	-0.00889998	-0.599812
O08795	Glucosidase 2 subunit beta	no	0.530467		1.26914	0.0228037	0.34613		0.383118	0.46927	-0.0771662		-0.833666	0.375123	0	Glucosidase 2 subunit beta	0.607469	0.399506	0.361839	0.0364797	0.624123	0	0	0.207963	1	0		Q9CZU6	Citrate synthase, mitochondrial	0.673376		1.81824	0.331046	0.50019		0.546759	0.872737	-0.0280426		-1.1196	0.540027
Q8CI51	PDZ and LIM domain protein 5	no		1.32794	-1.0651	-1.05033		2.13018	-0.0688645	-0.932138		1.00308	1.02189	0.332632	0	PDZ and LIM domain protein 5	-0.262496	0.376394	0.795231	0.911618	0.625839	1	1	-0.63889	0	1		F7BX26	Serine/threonine-protein phosphatase		1.50009	-0.515996	-0.742093		2.27035	0.0947765	-0.528671		1.03513	0.735955	0.497536
P97290	Plasma protease C1 inhibitor	no	0.821897	-0.817946	0.798338		0.304007	-0.771874	0.239081		-0.594863	0.211373	-0.706321		0	Plasma protease C1 inhibitor	0.26743	-0.0762618	0.54273	0.348311	0.626886	0	0	0.343691	1	0		Q9EPB4	Apoptosis-associated speck-like protein containing a CARD	0.964805	-0.645794	1.34744		0.458067	-0.63171	0.402722		-0.54574	0.243425	-0.992259
Q91X72	Hemopexin	no	0.0759348	-0.288916	1.01572	-0.824459	0.173628	-0.840249	0.461255	-0.879174	0.12426	-0.553877	-0.528348	-0.0113583	0	Hemopexin	-0.00543112	-0.271135	0.387356	0.344941	0.627002	0	0	0.265704	1	0		Q8K1M3	cAMP-dependent protein kinase type II-alpha regulatory subunit	0.218843	-0.116764	1.56482	-0.516217	0.327687	-0.700085	0.624896	-0.475708	0.173383	-0.521826	-0.814286	0.153546
P34022	Ran-specific GTPase-activating protein	no	0.19976	-1.09435	0.269586	-0.711619	0.515511	-0.785405	0.358013	-0.479752	0.110506	0.197905	0.0171385	0.157947	0	Ran-specific GTPase-activating protein	-0.334156	-0.097908	0.337879	0.316571	0.628178	0	0	-0.236248	0	1		P24527	Leukotriene A-4 hydrolase	0.342668	-0.922198	0.818687	-0.403377	0.669571	-0.64524	0.521654	-0.0762854	0.159629	0.229957	-0.268799	0.322851
Q9CZS1	Aldehyde dehydrogenase X, mitochondrial	no	0.51656	0.957582	0.325735	-0.614038	0.254761	0.271991	0.528518	-0.760061	-0.120317	-0.677916	0.0172254	-0.204897	0	Aldehyde dehydrogenase X, mitochondrial	0.29646	0.0738023	0.331083	0.284915	0.628819	0	0	0.222658	1	0		Q9CQM5	Thioredoxin domain-containing protein 17	0.659468	1.12973	0.874836	-0.305795	0.40882	0.412155	0.692159	-0.356595	-0.0711939	-0.645864	-0.268713	-0.0399925
Q9DCB8	Iron-sulfur cluster assembly 2 homolog, mitochondrial	no	-0.517507	-1.67148	-0.755646	-1.08595	-0.0904187	-1.48981	-0.0181591	-1.44653	0.383943	-0.0522168	0.728696	-0.31281	0	Iron-sulfur cluster assembly 2 homolog, mitochondrial	-1.00764	-0.76123	0.25009	0.408515	0.628983	0	0	-0.246413	0	1		Q5SPV7	Acylphosphatase;Acylphosphatase-2	-0.374599	-1.49932	-0.206545	-0.777704	0.063641	-1.34965	0.145482	-1.04306	0.433066	-0.0201649	0.442758	-0.147905
Q9D997	N-acetyl-D-glucosamine kinase	no	-0.161304	0.544543	-0.0271459	0.115807	0.141193	0.955163	-0.302035	0.299918	-0.014767	0.154702	-0.278412	0.0671424	0	N-acetyl-D-glucosamine kinase	0.117975	0.27356	0.153031	0.260466	0.629137	0	0	-0.155585	0	1		Q99KB8	Hydroxyacylglutathione hydrolase, mitochondrial	-0.0183957	0.716695	0.521955	0.424049	0.295253	1.09533	-0.138394	0.703384	0.0343565	0.186754	-0.56435	0.232047
Q99J39	Malonyl-CoA decarboxylase, mitochondrial	no	-0.346045	-0.0300694	-2.11589	-0.560294	-0.445581	-0.051971	-0.626951	-0.888584	-0.0376279	-0.0196978	1.45285	-0.271231	0	Malonyl-CoA decarboxylase, mitochondrial	-0.763073	-0.503272	0.463899	0.175775	0.629219	0	0	-0.259802	0	1		Q9EQP2	EH domain-containing protein 4	-0.203136	0.142083	-1.56678	-0.252052	-0.291521	0.0881934	-0.463311	-0.485118	0.0114957	0.0123541	1.16691	-0.106327
P23927	Alpha-crystallin B chain	no	-1.36134	1.34188	-0.0834923	1.23186	-0.548774	0.129052	-0.163064	0.314913	0.848272	-1.11333	0.20087	-0.88942	0	Alpha-crystallin B chain	0.28223	-0.0669683	0.63638	0.188332	0.630143	0	0	0.349198	1	0	P12265	A2ASS6	Titin	-1.21843	1.51404	0.465609	1.54011	-0.394714	0.269217	0.000576887	0.718379	0.897395	-1.08128	-0.0850681	-0.724516
Q9R0P5	Destrin	no	0.21177	-0.0852464	0.525815	-0.169737	0.263428	-0.0627733	0.536266	0.153967	0.109472	0.254356	0.165016	0.397668	0	Destrin	0.12065	0.222722	0.157897	0.124566	0.630846	0	0	-0.102072	0	1		O35639	Annexin A3	0.354678	0.0869057	1.07492	0.138505	0.417488	0.0773911	0.699907	0.557433	0.158596	0.286408	-0.120922	0.562572
Q99NF7	Protein phosphatase 1B	no	-0.252578	-0.275146	-0.26364	-0.864647	-0.298628	-0.378829	0.0530933	-0.619455	-0.0536028	0.111211	0.318462	0.291166	0	Protein phosphatase 1B	-0.414003	-0.310955	0.150285	0.139183	0.632942	0	0	-0.103048	0	1		Q9DCX2	ATP synthase subunit d, mitochondrial	-0.10967	-0.102994	0.285461	-0.556405	-0.144568	-0.238665	0.216734	-0.215989	-0.00447927	0.143263	0.032524	0.45607
Q60605	Myosin light polypeptide 6;Myosin light chain 6B	no	1.34705	-0.247753	2.11392	0.656387	1.07393	0.333647	0.347928	1.0026	-0.329195	0.518061	-2.10302	0.535713	0	Myosin light polypeptide 6;Myosin light chain 6B	0.967401	0.689525	0.502658	0.201891	0.635361	0	0	0.277876	1	0	P53986	P97372	Proteasome activator complex subunit 2	1.48995	-0.0756011	2.66303	0.96463	1.22799	0.473811	0.511569	1.40606	-0.280072	0.550113	-2.38896	0.700617
E9Q616	0	no	-0.163454	-0.780204	0.764029	-0.557505	0.339998	-0.298889	0.0621276	-0.0890924	0.479648	0.556848	-0.629181	0.48632	0	0	-0.184284	0.00353587	0.34085	0.134375	0.635802	0	0	-0.187819	0	1		E9Q7Q3		-0.0205453	-0.608052	1.31313	-0.249263	0.494057	-0.158725	0.225769	0.314374	0.528771	0.5889	-0.915119	0.651224
P59999	Actin-related protein 2/3 complex subunit 4	no	0.100639	1.11683	0.895513	0.908511	0.348067	1.42555	0.552516	1.41812	0.171949	0.320255	-0.130158	0.439262	0	Actin-related protein 2/3 complex subunit 4	0.755373	0.936063	0.224057	0.283552	0.635808	0	0	-0.18069	0	1		P09528	Ferritin heavy chain	0.243547	1.28898	1.44461	1.21675	0.502127	1.56572	0.716157	1.82159	0.221073	0.352307	-0.416096	0.604166
O09111	NADH dehydrogenase [ubiquinone] 1 beta subcomplex subunit 11, mitochondrial	no	0.167199	1.47022		1.87697	1.83355	1.43515		1.1304	1.62583	-0.0355041		-0.745926	0	NADH dehydrogenase [ubiquinone] 1 beta subcomplex subunit 11, mitochondrial	1.17146	1.46637	0.515678	0.203581	0.636692	0	0	-0.294906	0	1		Q60936	Chaperone activity of bc1 complex-like, mitochondrial	0.310107	1.64237		2.18521	1.98761	1.57531		1.53387	1.67496	-0.00345221		-0.581022
D3YTT7	40S ribosomal protein SA	no	0.0854486	0.250484	0.141092	0.294656	-1.06245	0.36036	0.229665	0.489757	-1.35427	-0.0306099	0.150653	0.226534	0	40S ribosomal protein SA	0.19292	0.00433347	0.0482183	0.359535	0.637919	0	0	0.188587	1	0		P28474	Alcohol dehydrogenase class-3	0.228357	0.422636	0.690194	0.602898	-0.908388	0.500524	0.393306	0.893223	-1.30515	0.00144204	-0.135285	0.391438
Q91VF2	Histamine N-methyltransferase	no		0.054493	-1.22332	-0.0221138		-0.123521	-0.84949	-0.978101		-0.261959	0.561541	-0.784884	0	Histamine N-methyltransferase	-0.396981	-0.65037	0.413762	0.266028	0.638011	0	0	0.253389	1	0	Q61233	Q9D7G0	Ribose-phosphate pyrophosphokinase 1		0.226645	-0.674222	0.286128		0.0166434	-0.685849	-0.574634		-0.229907	0.275603	-0.61998
Q9Z1Q5	Chloride intracellular channel protein 1	no	0.693743	1.13678	1.0373	0.544503	0.54407	1.19059	0.455161	0.794068	-0.122912	0.0706734	-0.542061	0.225653	0	Chloride intracellular channel protein 1	0.853082	0.745972	0.13995	0.164655	0.638207	0	0	0.107109	1	0		Q99KR7	Peptidyl-prolyl cis-trans isomerase F, mitochondrial	0.836651	1.30893	1.5864	0.852745	0.69813	1.33075	0.618802	1.19753	-0.073788	0.102725	-0.827999	0.390558
O35593	26S proteasome non-ATPase regulatory subunit 14	no	-0.24092	0.729644	0.541888	0.362462	0.588895	0.97609	0.123477	0.264393	0.684838	0.315047	-0.351441	0.0557971	0	26S proteasome non-ATPase regulatory subunit 14	0.348269	0.488214	0.210214	0.18958	0.638797	0	0	-0.139945	0	1		F6ZSC6	Calcium-binding mitochondrial carrier protein Aralar2	-0.0980114	0.901796	1.09099	0.670704	0.742955	1.11625	0.287118	0.667859	0.733962	0.347099	-0.637379	0.220701
Q8C166	Copine-1	no	0.155164	0.357337	0.604899	0.123648	0.402836	0.518032	0.237553	0.334293	0.3016	-0.0922687	-0.266197	0.0815646	0	Copine-1	0.310262	0.373178	0.111021	0.0589975	0.639925	0	0	-0.0629165	0	1		P16015	Carbonic anhydrase 3	0.298072	0.529489	1.154	0.43189	0.556895	0.658196	0.401194	0.737759	0.350724	-0.0602168	-0.552135	0.246469
P29758	Ornithine aminotransferase, mitochondrial	no	-0.0719694	0.385897	-0.0998831	0.0962352	-0.358758	-0.0841383	0.398931	-0.0253845	-0.371954	-0.406856	0.661116	-0.0482734	0	Ornithine aminotransferase, mitochondrial	0.0775699	-0.0173374	0.111529	0.156624	0.640943	0	0	0.0949074	1	0		P03953	Complement factor D	0.0709388	0.558049	0.449218	0.404477	-0.204699	0.0560262	0.562572	0.378082	-0.32283	-0.374804	0.375179	0.116631
P99028	Cytochrome b-c1 complex subunit 6, mitochondrial	no	-0.232421	-1.33752	0.482506	-0.836813	0.717547	-1.3924	0.30739	-0.371505	0.911833	-0.0526411	0.0269949	0.293688	0	Cytochrome b-c1 complex subunit 6, mitochondrial	-0.481061	-0.184741	0.392679	0.460944	0.642387	0	0	-0.29632	0	1		Q9CXT8	Mitochondrial-processing peptidase subunit beta	-0.0895129	-1.16536	1.03161	-0.528571	0.871607	-1.25223	0.471031	0.0319609	0.960956	-0.0205892	-0.258943	0.458592
Q9CPT4	UPF0556 protein C19orf10 homolog	no	0.667329	-0.101276	0.641008	0.307598	0.450486	0.0601514	0.374698	0.232387	-0.260906	0.193593	-0.276664	0.103889	0	UPF0556 protein C19orf10 homolog	0.378665	0.279431	0.179709	0.085942	0.642763	0	0	0.0992337	1	0	Q8QZT1	A6ZI44	Fructose-bisphosphate aldolase;Fructose-bisphosphate aldolase A	0.810237	0.0708756	1.19011	0.61584	0.604546	0.200316	0.538339	0.635853	-0.211782	0.225645	-0.562602	0.268794
Q9DCV4	Regulator of microtubule dynamics protein 1	no	-0.15818	-1.34662	-0.648302	-0.769142	-0.389357	-0.708391	-0.182928	-1.03945	-0.222996	0.0780441	0.610633	-0.325654	0	Regulator of microtubule dynamics protein 1	-0.730562	-0.580032	0.244166	0.187437	0.643303	0	0	-0.150529	0	1		Q8BMS1	Trifunctional enzyme subunit alpha, mitochondrial;Long-chain enoyl-CoA hydratase;Long chain 3-hydroxyacyl-CoA dehydrogenase	-0.0152721	-1.17447	-0.0992008	-0.4609	-0.235297	-0.568227	-0.0192873	-0.635987	-0.173873	0.110096	0.324696	-0.16075
Q8BVQ9	26S protease regulatory subunit 7	no	-0.367698	0.464935	0.807043	0.647825	0.573817	0.475609	0.818796	0.254411	0.964231	0.128997	0.0288409	-0.63176	0	26S protease regulatory subunit 7	0.388026	0.530658	0.261423	0.116986	0.643688	0	0	-0.142632	0	1		Q8BKZ9	Pyruvate dehydrogenase protein X component, mitochondrial	-0.224789	0.637087	1.35614	0.956068	0.727877	0.615773	0.982437	0.657878	1.01336	0.161049	-0.257097	-0.466855
P24527	Leukotriene A-4 hydrolase	no	0.386963	0.683384	0.885834	0.27877	0.140958	0.273758	1.22405	-0.0239212	-0.262444	-0.300052	0.121862	-0.166449	0	Leukotriene A-4 hydrolase	0.558738	0.403712	0.138569	0.280142	0.643723	0	0	0.155026	1	0		P10605	Cathepsin B;Cathepsin B light chain;Cathepsin B heavy chain	0.529871	0.855536	1.43494	0.587013	0.295018	0.413922	1.38769	0.379545	-0.21332	-0.268	-0.164076	-0.00154454
P36552	Coproporphyrinogen-III oxidase, mitochondrial	no	0.043085	0.993962	-0.902662	0.393076	-0.0572581	0.402777	-0.562439	-0.132022	-0.262761	-0.758023	0.312809	-0.595102	0	Coproporphyrinogen-III oxidase, mitochondrial	0.131865	-0.0872355	0.396818	0.19766	0.644803	0	0	0.219101	1	0		Q9Z2Y8	Proline synthase co-transcribed bacterial homolog protein	0.185993	1.16611	-0.353561	0.701318	0.0968015	0.542942	-0.398798	0.271444	-0.213638	-0.725971	0.0268709	-0.430198
P62814	V-type proton ATPase subunit B, brain isoform	no	0.120487		0.958668	0.707103	0.580422		0.261496	0.529281	0.363387		-0.506444	-0.212586	0	V-type proton ATPase subunit B, brain isoform	0.595419	0.457066	0.248322	0.0988933	0.645225	0	0	0.138353	1	0		P26645	Myristoylated alanine-rich C-kinase substrate	0.263395		1.50777	1.01534	0.734482		0.425137	0.932747	0.412511		-0.792382	-0.0476813
P80316	T-complex protein 1 subunit epsilon	no	-0.00908165	0.414059	0.106709	-0.228673	-0.258741	0.349684	0.0680373	-0.256568	-0.367557	-0.318215	-0.0220456	-0.242783	0	T-complex protein 1 subunit epsilon	0.0707533	-0.024397	0.13391	0.14643	0.648676	0	0	0.0951503	1	0		Q99LB4	Macrophage-capping protein	0.133827	0.586211	0.65581	0.0795694	-0.104682	0.489848	0.231678	0.146899	-0.318434	-0.286164	-0.307984	-0.0778783
Q91VH6	Protein MEMO1	no	0.622966	1.16533		0.275913	0.43071	1.39041		0.804695	-0.366065	0.0969013		0.659741	0	Protein MEMO1	0.68807	0.875271	0.258809	0.279279	0.648867	0	0	-0.1872	0	1		Q9DBD0	Inhibitor of carbonic anhydrase	0.765874	1.33749		0.584155	0.58477	1.53057		1.20816	-0.316941	0.128953		0.824646
Q924D0	Reticulon-4-interacting protein 1, mitochondrial	no	0.129115	1.10934	-0.488362	1.19144	-0.138277	0.939192	-0.443205	0.593738	-0.323601	-0.237915	0.0341071	-0.593451	0	Reticulon-4-interacting protein 1, mitochondrial	0.485384	0.237862	0.404449	0.319354	0.648896	0	0	0.247522	1	0		Q8QZR5	Alanine aminotransferase 1	0.272023	1.28149	0.0607391	1.49969	0.015783	1.07936	-0.279564	0.997204	-0.274477	-0.205863	-0.251831	-0.428546
P32261	Antithrombin-III	no	-0.248614	-0.827321	0.274485	-0.0514899	-0.143423	-0.910021	-0.0502071	-0.324186	0.125027	0.128223	-0.430875	-0.309632	0	Antithrombin-III	-0.213235	-0.356959	0.23137	0.192926	0.650705	0	0	0.143724	1	0		P61971	Nuclear transport factor 2	-0.105706	-0.655169	0.823586	0.256752	0.0106367	-0.769856	0.113434	0.0792799	0.174151	0.160275	-0.716813	-0.144728
F8WIA1	CAP-Gly domain-containing linker protein 1	no	-0.0740311	-1.24034	-0.542337	-0.502707	0.241003	-1.15745	0.0260255	-0.700716	0.379876	-0.0647948	0.477374	-0.0436236	0	CAP-Gly domain-containing linker protein 1	-0.589854	-0.397783	0.241361	0.323589	0.652372	0	0	-0.192071	0	1		Q99JY9	Actin-related protein 3	0.0688771	-1.06819	0.0067647	-0.194465	0.395063	-1.01728	0.189666	-0.29725	0.429	-0.0327429	0.191436	0.121281
Q561M1	Low molecular weight phosphotyrosine protein phosphatase	no	-0.135282	0.0109615	-0.117104		-0.0941506	0.942152	-0.436984		0.0718918	0.976722	-0.182194		0	Low molecular weight phosphotyrosine protein phosphatase	-0.0804748	0.137006	0.0460184	0.414559	0.652971	0	0	-0.21748	0	1		O88696	Putative ATP-dependent Clp protease proteolytic subunit, mitochondrial	0.00762616	0.183114	0.431997		0.059909	1.08232	-0.273343		0.121015	1.00877	-0.468132
P61979	Heterogeneous nuclear ribonucleoprotein K	no	0.0875407	-0.694308	0.507274	-0.251211	-0.303852	-0.367782	-0.206098	0.00623359	-0.41143	0.151784	-0.532591	0.114864	0	Heterogeneous nuclear ribonucleoprotein K	-0.0876761	-0.217875	0.254855	0.0817658	0.654677	0	0	0.130199	1	0		O70435	Proteasome subunit alpha type-3	0.230449	-0.522156	1.05638	0.0570314	-0.149793	-0.227618	-0.0424568	0.4097	-0.362306	0.183836	-0.818528	0.279768
Q9DCM2	Glutathione S-transferase kappa 1	no	-0.492695	-0.0384983	-1.38156	-0.0818334	-0.718346	-0.446427	-0.685756	-0.769271	-0.201319	-0.352772	0.813209	-0.708245	0	Glutathione S-transferase kappa 1	-0.498648	-0.65495	0.311588	0.0716003	0.655453	0	0	0.156302	1	0	P09470	Q8BHG2	UPF0587 protein C1orf123 homolog	-0.349787	0.133654	-0.832462	0.226409	-0.564286	-0.306262	-0.522115	-0.365804	-0.152196	-0.32072	0.527271	-0.543341
Q91VB8	Hemoglobin subunit alpha	no	0.370279	-0.579342	0.2944	0.424713	0.13294	-0.0174218	-0.372752	0.249458	-0.247899	0.745904	-0.541575	-0.113741	0	Hemoglobin subunit alpha	0.127513	-0.0019441	0.237128	0.135134	0.656216	0	0	0.129457	1	0		F7AXC4	Parathymosin	0.513188	-0.40719	0.843502	0.732956	0.287	0.122743	-0.209111	0.652924	-0.198775	0.777956	-0.827512	0.0511633
Q8VDN2	Sodium/potassium-transporting ATPase subunit alpha-1	no	-0.0536813	0.532548	1.52725	0.991922	0.724626	0.666026	1.00776	1.30215	0.739813	0.166191	-0.450138	0.338953	0	Sodium/potassium-transporting ATPase subunit alpha-1	0.74951	0.925141	0.336134	0.146148	0.656287	0	0	-0.17563	0	1		Q8VCW8	Acyl-CoA synthetase family member 2, mitochondrial	0.0892269	0.7047	2.07635	1.30016	0.878686	0.80619	1.1714	1.70562	0.788936	0.198243	-0.736076	0.503857
P55264	Adenosine kinase	no	-0.1809	-0.0229675	-0.600261	-0.634665	-0.355835	-0.214807	-0.393159	-0.861638	-0.172998	-0.09525	0.167321	-0.160727	0	Adenosine kinase	-0.359698	-0.45636	0.152434	0.140445	0.657519	0	0	0.0966614	1	0		O35855	Branched-chain-amino-acid aminotransferase, mitochondrial;Branched-chain-amino-acid aminotransferase	-0.0379915	0.149185	-0.05116	-0.326422	-0.201775	-0.0746424	-0.229518	-0.458172	-0.123874	-0.0631981	-0.118617	0.00417777
Q9R0P3	S-formylglutathione hydrolase	no	0.186617	1.43731	-0.135724	1.28956	-0.00831693	1.33553	-0.764743	1.05647	-0.220801	-0.153538	-0.528525	-0.313193	0	S-formylglutathione hydrolase	0.694441	0.404734	0.392968	0.485578	0.659842	0	0	0.289707	1	0		Q69Z91	Acetyl-coenzyme A synthetase 2-like, mitochondrial	0.329526	1.60946	0.413377	1.5978	0.145743	1.47569	-0.601102	1.45993	-0.171677	-0.121486	-0.814463	-0.148289
P68510	14-3-3 protein eta	no	0.974987	-0.680986	0.488773	-0.451244	0.050582	-0.706151	0.142971	0.0213183	-0.954563	0.207468	-0.221706	0.43184	0	14-3-3 protein eta	0.0828824	-0.12282	0.390447	0.196164	0.660095	0	0	0.205702	1	0		Q9R1P0	Proteasome subunit alpha type-4;Proteasome subunit alpha type	1.1179	-0.508834	1.03787	-0.143002	0.204642	-0.565987	0.306612	0.424785	-0.90544	0.23952	-0.507644	0.596744
P97379	Ras GTPase-activating protein-binding protein 2	no	-0.717707	-0.800692	-0.148454		-1.05788	-0.586315	-0.420221		-0.289337	0.344016	-0.393751		0	Ras GTPase-activating protein-binding protein 2	-0.555618	-0.688138	0.204986	0.190987	0.660986	0	0	0.13252	1	0		Q62446	Peptidyl-prolyl cis-trans isomerase FKBP3	-0.574799	-0.62854	0.400647		-0.903819	-0.44615	-0.25658		-0.240213	0.376068	-0.679689
P52503	NADH dehydrogenase [ubiquinone] iron-sulfur protein 6, mitochondrial	no	-0.465107	-1.9273	-1.08222	-1.11667	0.0330747	-2.1397	-0.192081	-1.2197	0.864752	-0.0371826	0.993021	-0.00359707	0	NADH dehydrogenase [ubiquinone] iron-sulfur protein 6, mitochondrial	-1.14782	-0.8796	0.299855	0.500763	0.665488	0	0	-0.268223	0	1		P52503	NADH dehydrogenase [ubiquinone] iron-sulfur protein 6, mitochondrial	-0.322199	-1.75514	-0.533117	-0.808426	0.187134	-1.99953	-0.0284399	-0.816231	0.913875	-0.00513067	0.707083	0.161307
Q9WVA2	Mitochondrial import inner membrane translocase subunit Tim8 A;Putative mitochondrial import inner membrane translocase subunit Tim8 A-B	no	-0.408808	-1.56073	-0.368699	-0.436536	-0.642855	-1.17937	0.334303	-0.513829	-0.159681	0.243909	0.741482	0.0166435	0	Mitochondrial import inner membrane translocase subunit Tim8 A;Putative mitochondrial import inner membrane translocase subunit Tim8 A-B	-0.693692	-0.500439	0.289347	0.313343	0.666491	0	0	-0.193254	0	1		Q3UER8	Fibrinogen gamma chain	-0.2659	-1.38857	0.180403	-0.128294	-0.488795	-1.03921	0.497944	-0.110363	-0.110558	0.275961	0.455544	0.181548
Q99KK7	Dipeptidyl peptidase 3	no	0.590706	1.22195	0.581369	1.01282	0.804746	1.20937	0.180847	0.730378	0.115405	-0.039675	-0.55588	-0.183709	0	Dipeptidyl peptidase 3	0.851713	0.731334	0.159229	0.21153	0.666515	0	0	0.120379	1	0		Q58A65	C-Jun-amino-terminal kinase-interacting protein 4	0.733615	1.39411	1.13047	1.32106	0.958805	1.34953	0.344488	1.13384	0.164529	-0.00762311	-0.841818	-0.0188049
Q9WUM3	Coronin-1B	no	0.0614828	1.68751	0.813453	1.11169	-1.82389	1.92403	0.444033	1.4584	-1.81435	0.38349	-0.390911	0.222017	0	Coronin-1B	0.918535	0.500643	0.338405	0.834166	0.66685	0	0	0.417892	1	0		Q02566	Myosin-6	0.204391	1.85967	1.36255	1.41993	-1.66983	2.06419	0.607674	1.86187	-1.76523	0.415542	-0.676849	0.386921
P63328	Serine/threonine-protein phosphatase 2B catalytic subunit alpha isoform	no	0.124088	0.726601		0.448649	-0.308839	0.451385		0.670565	-0.235976	-0.0615811		0.0135873	0	Serine/threonine-protein phosphatase 2B catalytic subunit alpha isoform	0.433113	0.271037	0.174104	0.296761	0.667592	0	0	0.162076	1	0		Q8CIB5	Fermitin family homolog 2	0.266996	0.898753		0.756892	-0.154779	0.591549		1.07403	-0.186853	-0.0295291		0.178492
Q64442	Sorbitol dehydrogenase	no	0.38306	-0.343615	-0.0589418	-0.534504	-0.131159	0.149451	-0.191463	-0.927731	-0.131516	0.142227	0.0613846	-0.420381	0	Sorbitol dehydrogenase	-0.1385	-0.275225	0.199425	0.229834	0.669278	0	0	0.136725	1	0		Q9Z2I8	Succinyl-CoA ligase [GDP-forming] subunit beta, mitochondrial	0.525969	-0.171463	0.490159	-0.226262	0.0229004	0.289616	-0.0278221	-0.524264	-0.0823925	0.174279	-0.224553	-0.255477
Q00897	Alpha-1-antitrypsin 1-4	no	-0.39632	-0.635774	0.551137	0.129655	-0.351908	-0.555923	0.145186	-0.143815	-0.0582123	0.0886981	-0.427843	-0.200232	0	Alpha-1-antitrypsin 1-4	-0.0878258	-0.226615	0.2663	0.149787	0.669747	0	0	0.138789	1	0		Q99L13	3-hydroxyisobutyrate dehydrogenase, mitochondrial	-0.253412	-0.463622	1.10024	0.437897	-0.197848	-0.415759	0.308827	0.259651	-0.0090887	0.12075	-0.713781	-0.0353278
Q3TMH2	Secernin-3	no	0.00908035	0.336128	-0.803012	0.127233	-0.134002	0.184977	-0.360067	-0.551815	-0.0851464	-0.104762	0.35921	-0.408086	0	Secernin-3	-0.0826425	-0.215226	0.24946	0.158385	0.672148	0	0	0.132584	1	0		O09061	Proteasome subunit beta type-1	0.151989	0.50828	-0.253911	0.435476	0.0200577	0.325142	-0.196426	-0.148348	-0.0360229	-0.0727103	0.0732718	-0.243182
Q99KB8	Hydroxyacylglutathione hydrolase, mitochondrial	no	-0.465341	0.43903	-0.114006	0.0843495	-0.249017	0.151481	-0.0220774	-0.328235	0.186849	-0.469636	0.16068	-0.39959	0	Hydroxyacylglutathione hydrolase, mitochondrial	-0.0139919	-0.111962	0.188993	0.109178	0.673057	0	0	0.0979703	1	0		D3Z7X0		-0.322433	0.611182	0.435095	0.392592	-0.0949573	0.291645	0.141564	0.0752312	0.235972	-0.437584	-0.125258	-0.234686
E9QA16	0	no	0.448197		1.02243	-0.133995	0.0989615		0.2467	0.487454	-0.289746		-0.701937	0.675297	0	0	0.445544	0.277705	0.333834	0.113215	0.673082	0	0	0.167838	1	0		Q8CC13	AP-1 complex subunit beta-1;AP-2 complex subunit beta	0.591105		1.57153	0.174247	0.253021		0.410341	0.89092	-0.240623		-0.987875	0.840201
Q9CQ60	6-phosphogluconolactonase	no	0.0141354	0.305491	0.107075	-0.18539	0.100897	0.073875	0.141921	-0.345909	0.257372	-0.220236	0.0430978	-0.078664	0	6-phosphogluconolactonase	0.0603279	-0.00730402	0.101981	0.113732	0.673647	0	0	0.0676319	1	0		P62960	Nuclease-sensitive element-binding protein 1	0.157044	0.477643	0.656176	0.122853	0.254957	0.214039	0.305562	0.0575568	0.306496	-0.188184	-0.24284	0.0862402
P54775	26S protease regulatory subunit 6B	no	-0.60296	0.709116		0.890748	0.761194	0.493718		0.437835	1.45783	0.308681		-0.615639	0	26S protease regulatory subunit 6B	0.332301	0.564249	0.470561	0.0997851	0.673788	0	0	-0.231947	0	1		Q6P8J7	Creatine kinase S-type, mitochondrial	-0.460052	0.881268		1.19899	0.915253	0.633882		0.841301	1.50696	0.340733		-0.450735
Q9CQ62	2,4-dienoyl-CoA reductase, mitochondrial	no	-0.520147	-0.156705	-1.70191	-0.593585	-0.959998	-0.599071	-0.904459	-1.15167	-0.455875	-0.333834	0.735579	-0.592538	0	2,4-dienoyl-CoA reductase, mitochondrial	-0.743086	-0.903799	0.333571	0.114549	0.674084	0	0	0.160714	1	0		P21300	Aldose reductase-related protein 1	-0.377238	0.0154471	-1.15281	-0.285343	-0.805938	-0.458907	-0.740818	-0.748204	-0.406751	-0.301782	0.449641	-0.427634
E9PX78	Eukaryotic translation initiation factor 3 subunit B	no	0.473826		-0.687829	0.692335	-0.584763		0.12324	2.27904	-1.08766		0.66345	1.26618	0	Eukaryotic translation initiation factor 3 subunit B	0.159444	0.605841	0.428307	0.861206	0.674847	0	0	-0.446397	0	1		P19783	Cytochrome c oxidase subunit 4 isoform 1, mitochondrial	0.616734		-0.138727	1.00058	-0.430703		0.286881	2.68251	-1.03854		0.377512	1.43109
Q9Z0S1	3(2),5-bisphosphate nucleotidase 1	no	-0.218352	0.0584316	-0.386633	-0.128106	-0.198747	-0.263301	-0.149571	-0.23863	0.126177	-0.250264	0.286659	0.113913	0	3(2),5-bisphosphate nucleotidase 1	-0.168665	-0.212562	0.0927348	0.024854	0.674949	0	0	0.0438973	1	0		Q9CR24	Nucleoside diphosphate-linked moiety X motif 8, mitochondrial	-0.075444	0.230584	0.162468	0.180136	-0.0446872	-0.123136	0.0140695	0.164836	0.175301	-0.218212	0.000721115	0.278817
Q8BKC5	Importin-5	no	0.0624842	-0.345791	0.548712	0.47123	0.209952	-0.343679	-0.839084	0.935332	0.120417	0.0679838	-0.981593	0.242394	0	Importin-5	0.184159	-0.0093696	0.206349	0.380871	0.675196	0	0	0.193528	1	0		P51125	Calpastatin	0.205393	-0.173639	1.09781	0.779472	0.364012	-0.203514	-0.675443	1.3388	0.16954	0.100036	-1.26753	0.407298
O70435	Proteasome subunit alpha type-3	no	0.182133	0.592709	0.136166	0.104335	0.204674	0.689013	0.0528451	0.380346	0.0849658	0.0897592	-0.0446361	0.167145	0	Proteasome subunit alpha type-3	0.253836	0.33172	0.114081	0.136606	0.677455	0	0	-0.0778838	0	1		Q8C1A5	Thimet oligopeptidase	0.325041	0.764861	0.685267	0.412577	0.358734	0.829178	0.216486	0.783812	0.134089	0.121811	-0.330574	0.332049
Q9CZ04	COP9 signalosome complex subunit 7a	no	-0.595893		0.091242	-0.53549	-0.719605		-0.363692	-0.301109	-0.108904		-0.19048	0.179811	0	COP9 signalosome complex subunit 7a	-0.346714	-0.461469	0.219671	0.130326	0.681498	0	0	0.114755	1	0		P63017	Heat shock cognate 71 kDa protein	-0.452985		0.640343	-0.227248	-0.565545		-0.200051	0.102357	-0.0597806		-0.476418	0.344715
Q00519	Xanthine dehydrogenase/oxidase;Xanthine dehydrogenase;Xanthine oxidase	no	0.375526	-1.06015	0.436108	0.449235	-0.110435	-0.855003	0.280814	0.113087	-0.548627	-0.229834	-0.0642719	-0.242493	0	Xanthine dehydrogenase/oxidase;Xanthine dehydrogenase;Xanthine oxidase	0.0501808	-0.142884	0.370457	0.250534	0.683055	0	0	0.193065	1	0		P19096	Fatty acid synthase;[Acyl-carrier-protein] S-acetyltransferase;[Acyl-carrier-protein] S-malonyltransferase;3-oxoacyl-[acyl-carrier-protein] synthase;3-oxoacyl-[acyl-carrier-protein] reductase;3-hydroxypalmitoyl-[acyl-carrier-protein] dehydratase;Enoyl-[acyl-carrier-protein] reductase;Oleoyl-[acyl-carrier-protein] hydrolase	0.518434	-0.887993	0.985209	0.757477	0.0436244	-0.714839	0.444455	0.516553	-0.499504	-0.197782	-0.35021	-0.077589
O08807	Peroxiredoxin-4	no	-0.127268	-0.374288	0.0390317		0.0454401	-0.296949	0.00127395		0.152761	0.258373	-0.0612039		0	Peroxiredoxin-4	-0.154175	-0.0834118	0.120071	0.107527	0.683574	0	0	-0.0707629	0	1		Q9DB15	39S ribosomal protein L12, mitochondrial	0.0156403	-0.202136	0.588133		0.1995	-0.156785	0.164915		0.201885	0.290424	-0.347142
P07901	Heat shock protein HSP 90-alpha	no	0.290372	0.186524	0.785696	-0.0260666	-0.00142183	0.194588	0.392666	0.317812	-0.280876	0.0674453	-0.095955	0.2295	0	Heat shock protein HSP 90-alpha	0.309131	0.225911	0.171963	0.0860786	0.685508	0	0	0.0832202	1	0		Q8QZV3	Enoyl-CoA delta isomerase 1, mitochondrial	0.43328	0.358676	1.3348	0.282176	0.152638	0.334753	0.556307	0.721278	-0.231752	0.0994973	-0.381893	0.394404
B1AQZ0	Septin-8	no		0.412306	1.43622	0.16922		0.83702	0.689077	1.04603		0.555025	-0.572106	1.01027	0	Septin-8	0.672581	0.857375	0.388213	0.103544	0.685704	0	0	-0.184794	0	1		Q9JLT4	Thioredoxin reductase 2, mitochondrial		0.584458	1.98532	0.477462		0.977185	0.852718	1.44949		0.587077	-0.858044	1.17517
F8WGL3	Cofilin-1	no	0.48049	-0.37942	0.689441	-0.033259	0.17902	-0.12019	0.318071	-0.0796613	-0.341175	0.181077	-0.272196	-0.130125	0	Cofilin-1	0.189313	0.0743102	0.242883	0.10485	0.685774	0	0	0.115003	1	0		O08804		0.623399	-0.207268	1.23854	0.274983	0.33308	0.0199747	0.481712	0.323805	-0.292051	0.213129	-0.558134	0.0347792
P63280	SUMO-conjugating enzyme UBC9	no		1.48288	0.845962	1.01116		1.32661	0.466298	1.12357		-0.24158	-0.459129	0.0769359	0	SUMO-conjugating enzyme UBC9	1.11334	0.972159	0.190828	0.259633	0.685808	0	0	0.141177	1	0		Q8VE95	UPF0598 protein C8orf82 homolog		1.65504	1.39506	1.31941		1.46678	0.629939	1.52703		-0.209528	-0.745067	0.24184
Q9QYJ0	DnaJ homolog subfamily A member 2	no	-1.08275	-0.116111		0.118422	-0.528696	0.0944197		-0.0953219	0.678056	-0.0694511		-0.0260899	0	DnaJ homolog subfamily A member 2	-0.360146	-0.176533	0.367591	0.184404	0.686021	0	0	-0.183614	0	1		P84084	ADP-ribosylation factor 5	-0.939842	0.0560412		0.426664	-0.374636	0.234584		0.308144	0.72718	-0.0373992		0.138814
Q9WUM5	Succinyl-CoA ligase [ADP/GDP-forming] subunit alpha, mitochondrial	no	-0.0907706	0.721982	-1.20753	2.02135	-0.108197	0.124764	0.102276	0.113335	0.0301691	-0.614089	1.4218	-1.93234	0	Succinyl-CoA ligase [ADP/GDP-forming] subunit alpha, mitochondrial	0.36126	0.0580443	0.680162	0.0556037	0.686543	0	0	0.303215	1	0		O08528	Hexokinase-2	0.0521377	0.894134	-0.658424	2.32959	0.0458623	0.264929	0.265917	0.516801	0.0792927	-0.582037	1.13586	-1.76744
Q9QZ88	Vacuolar protein sorting-associated protein 29	no	0.00596085	0.643073	0.12852	0.211203	-0.322053	0.650519	0.258592	0.922399	-0.311523	0.195319	0.102038	0.535624	0	Vacuolar protein sorting-associated protein 29	0.247189	0.377364	0.138532	0.270026	0.687819	0	0	-0.130175	0	1	Q9WV32	Q9Z0F7	Gamma-synuclein	0.148869	0.815225	0.677621	0.519445	-0.167993	0.790684	0.422233	1.32587	-0.2624	0.227371	-0.1839	0.700528
Q5EBG6	Heat shock protein beta-6	no	-1.06635	-0.738236	-0.355266	0.729083	-0.553276	-1.3386	-0.0354795	-0.315395	0.488123	-0.680718	0.16464	-1.13738	0	Heat shock protein beta-6	-0.357692	-0.560687	0.390309	0.280061	0.688797	0	0	0.202994	1	0		Q8CI51	PDZ and LIM domain protein 5	-0.923441	-0.566084	0.193835	1.03733	-0.399216	-1.19843	0.128161	0.0880707	0.537246	-0.648666	-0.121298	-0.972478
P58252	Elongation factor 2	no	0.775631	0.96648	-0.295354	0.340129	-0.113658	0.592503	0.635612	1.35941	-0.869027	-0.138006	0.8445	1.0221	0	Elongation factor 2	0.446722	0.618467	0.279936	0.300828	0.690605	0	0	-0.171746	0	1		P17183	Gamma-enolase;Enolase	0.918539	1.13863	0.253747	0.648372	0.0404014	0.732668	0.799253	1.76288	-0.819903	-0.105954	0.558562	1.18701
P53996	Cellular nucleic acid-binding protein	no	0.608127	-1.7586	-0.674879		0.664218	-1.77638	0.651688		-0.101929	0.21709	1.53751		0	Cellular nucleic acid-binding protein	-0.608452	-0.153492	0.684023	0.811454	0.690829	0	0	-0.45496	0	1		P15105	Glutamine synthetase	0.751035	-1.58645	-0.125777		0.818278	-1.63622	0.815329		-0.0528051	0.249142	1.25157
P19221	Prothrombin;Activation peptide fragment 1;Activation peptide fragment 2;Thrombin light chain;Thrombin heavy chain	no		0.149037	0.749675	0.424761		0.394436	0.545385	0.632823		0.114994	-0.0206353	0.0749825	0	Prothrombin;Activation peptide fragment 1;Activation peptide fragment 2;Thrombin light chain;Thrombin heavy chain	0.441158	0.524214	0.173583	0.0696258	0.690962	0	0	-0.0830567	0	1		P63073	Eukaryotic translation initiation factor 4E		0.321189	1.29878	0.733004		0.5346	0.709026	1.03629		0.147046	-0.306573	0.239887
Q9CR98	Protein FAM136A	no	-0.51906	-2.12739	-1.04854	-1.47367	-0.583694	-2.1429	-0.26958	-1.27515	0.0770564	0.0278571	0.765893	0.231475	0	Protein FAM136A	-1.29217	-1.06783	0.340048	0.415367	0.691108	0	0	-0.224334	0	1		Q9ERE7	LDLR chaperone MESD	-0.376152	-1.95524	-0.499443	-1.16543	-0.429634	-2.00274	-0.105939	-0.871686	0.12618	0.059909	0.479955	0.396379
P14211	Calreticulin	no	0.631932	-0.502825	0.896626	-0.0612818	0.218892	-0.760939	0.516503	0.279739	-0.439406	-0.0732909	-0.482482	0.321759	0	Calreticulin	0.241113	0.0635491	0.319808	0.282226	0.69189	0	0	0.177563	1	0	Q9CPQ8	P70122	Ribosome maturation protein SBDS	0.77484	-0.330673	1.44573	0.24696	0.372952	-0.620774	0.680144	0.683205	-0.390283	-0.041239	-0.76842	0.486663
Q3UGR5	Haloacid dehalogenase-like hydrolase domain-containing protein 2	no	-0.209562	-0.0676719	-0.364631	0.119955	-0.17462	-0.226269	0.160594	-0.592373	-0.0713088	-0.338251	0.429984	-0.586632	0	Haloacid dehalogenase-like hydrolase domain-containing protein 2	-0.130477	-0.208167	0.103176	0.154124	0.691928	0	0	0.0776896	1	0		P61982	14-3-3 protein gamma;14-3-3 protein gamma, N-terminally processed	-0.066654	0.10448	0.184471	0.428197	-0.02056	-0.0861043	0.324234	-0.188907	-0.0221852	-0.306199	0.144046	-0.421728
Q9Z0P4	Paralemmin-1	no	-0.0463765	-0.560286		-0.154362	0.383982	-0.456426		-0.299265	0.354689	0.325894		-0.00566257	0	Paralemmin-1	-0.253675	-0.123903	0.156443	0.257963	0.693685	0	0	-0.129772	0	1		P40936	Indolethylamine N-methyltransferase	0.0965318	-0.388134		0.15388	0.538041	-0.316262		0.104201	0.403813	0.357946		0.159242
Q62523	Zyxin	no	-0.152883	0.0849966		2.53352	0.991161	-0.153091		0.41374	0.851598	0.0642099		-1.96473	0	Zyxin	0.821879	0.41727	0.858573	0.330322	0.694253	0	0	0.404609	1	0	P68372	Q5XJY5	Coatomer subunit delta	-0.00997457	0.257149		2.84177	1.14522	-0.0129261		0.817206	0.900722	0.0962619		-1.79982
P61148	Fibroblast growth factor 1	no	-0.0372303	-0.59223	-1.287	-0.834611	-0.162031	-0.7411	-0.548677	-0.802911	-0.178794	-0.386664	0.783269	-0.0521374	0	Fibroblast growth factor 1	-0.687769	-0.56368	0.260284	0.144412	0.695165	0	0	-0.12409	0	1		Q8CJ53	Cdc42-interacting protein 4	0.105678	-0.420078	-0.737904	-0.526369	-0.00797119	-0.600936	-0.385036	-0.399445	-0.129671	-0.354612	0.497331	0.112767
Q8BHG2	UPF0587 protein C1orf123 homolog	no	-0.304449	-0.571487	-0.662621	-0.388627	-0.411381	-0.458394	-0.252816	-0.621814	0.301374	0.0461479	0.22739	-0.277597	0	UPF0587 protein C1orf123 homolog	-0.481796	-0.436101	0.0820949	0.0759334	0.697087	0	0	-0.0456948	0	1		Q8BG32	26S proteasome non-ATPase regulatory subunit 11	-0.16154	-0.399335	-0.11352	-0.0803848	-0.257321	-0.31823	-0.0891752	-0.218347	0.350497	0.0781998	-0.0585481	-0.112693
Q9D1Q6	Endoplasmic reticulum resident protein 44	no	0.0558372	0.498254	0.764783	0.0627137	-0.138134	0.442974	0.387752	0.329921	-0.112216	0.161026	-0.340909	0.170693	0	Endoplasmic reticulum resident protein 44	0.345397	0.255628	0.173926	0.133268	0.697189	0	0	0.0897684	1	0	Q9DC70	O35226	26S proteasome non-ATPase regulatory subunit 4	0.198745	0.670406	1.31388	0.370956	0.0159258	0.583139	0.551393	0.733387	-0.0630926	0.193078	-0.626847	0.335597
O55137	Acyl-coenzyme A thioesterase 1	no	-0.649138	-0.259072	-2.69069	-1.34218	-0.827384	-1.09533	-1.73853	-2.31408	-0.252277	-0.458173	0.921924	-1.06791	0	Acyl-coenzyme A thioesterase 1	-1.23527	-1.49383	0.534337	0.333622	0.698369	0	0	0.258562	1	0		E9PX78	Eukaryotic translation initiation factor 3 subunit B	-0.50623	-0.0869197	-2.14159	-1.03393	-0.673325	-0.955164	-1.57489	-1.91062	-0.203153	-0.426121	0.635987	-0.90301
Q9CY75	Glycine cleavage system H protein, mitochondrial	no		-2.1426	-1.18294	-1.25938		-2.03294	-0.0958646	-1.60748		0.0601555	1.17712	-0.204052	0	Glycine cleavage system H protein, mitochondrial	-1.52831	-1.24543	0.307939	0.587759	0.698433	0	0	-0.282877	0	1		P07309	Transthyretin		-1.97045	-0.633837	-0.95114		-1.89278	0.0677764	-1.20402		0.0922074	0.891186	-0.0391473
Q9CQB4	Cytochrome b-c1 complex subunit 7	no	0.174512	-0.27917	0.126263	0.0286046	1.32972	-0.215902	-0.573667	0.227531	1.16836	0.275377	-0.758184	0.17035	0	Cytochrome b-c1 complex subunit 7	0.0125522	0.19192	0.101866	0.413148	0.698884	0	0	-0.179368	0	1	Q08879	Q91VR2	ATP synthase subunit gamma, mitochondrial;ATP synthase gamma chain	0.31742	-0.107018	0.675364	0.336847	1.48378	-0.075738	-0.410026	0.630997	1.21748	0.307428	-1.04412	0.335255
E9PZF0	Nucleoside diphosphate kinase;Nucleoside diphosphate kinase B	no	-0.54966	-1.25226	-0.539181	-0.915158	-0.375868	-1.226	-0.118897	-1.02789	0.145972	0.126802	0.397103	-0.076627	0	Nucleoside diphosphate kinase;Nucleoside diphosphate kinase B	-0.814066	-0.687164	0.170223	0.262404	0.701272	0	0	-0.126901	0	1		Q9WUM3	Coronin-1B	-0.406751	-1.08011	0.00992034	-0.606916	-0.221808	-1.08583	0.0447438	-0.624429	0.195096	0.158854	0.111165	0.0882773
Q64433	10 kDa heat shock protein, mitochondrial	no	-0.491409	-1.57373	-0.774582	-1.05464	-0.789555	-1.92131	-0.280677	-1.61952	-0.261541	-0.122578	0.535929	-0.520494	0	10 kDa heat shock protein, mitochondrial	-0.97359	-1.15277	0.23073	0.376495	0.701775	0	0	0.179176	1	0		Q8R5L1	Complement component 1 Q subcomponent-binding protein, mitochondrial	-0.3485	-1.40158	-0.225481	-0.746399	-0.635495	-1.78115	-0.117036	-1.21605	-0.212417	-0.0905264	0.249991	-0.35559
Q91V64	Isochorismatase domain-containing protein 1	no	-0.297302	-0.148017	-0.83581	-0.885586	-0.475231	-0.403439	-0.424519	-1.33326	-0.096611	-0.273834	0.519581	-0.402071	0	Isochorismatase domain-containing protein 1	-0.541679	-0.659111	0.186966	0.22522	0.702634	0	0	0.117433	1	0		Q9DBJ1	Phosphoglycerate mutase 1	-0.154394	0.0241351	-0.286709	-0.577344	-0.321171	-0.263275	-0.260878	-0.929791	-0.0474875	-0.241782	0.233643	-0.237166
O55042	Alpha-synuclein;Beta-synuclein	no		-2.01042	-0.675178	-0.533394		-1.15823	-1.3294	0.0561891		0.868284	-0.0694859	0.595274	0	Alpha-synuclein;Beta-synuclein	-1.073	-0.810479	0.470494	0.436142	0.703475	0	0	-0.262517	0	1		Q8K2B3	Succinate dehydrogenase [ubiquinone] flavoprotein subunit, mitochondrial		-1.83827	-0.126077	-0.225152		-1.01806	-1.16576	0.459655		0.900336	-0.355424	0.760178
Q99KC8	von Willebrand factor A domain-containing protein 5A	no	0.125287	1.18047	0.649582	0.420045	0.358319	1.56409	0.222618	0.831882	0.180095	0.271641	-0.699507	0.403906	0	von Willebrand factor A domain-containing protein 5A	0.593846	0.744227	0.223045	0.302883	0.70433	0	0	-0.150381	0	1		P62192	26S protease regulatory subunit 4	0.268195	1.35262	1.19868	0.728287	0.512379	1.70425	0.386259	1.23535	0.229219	0.303693	-0.985445	0.56881
Q7TSV4	Phosphoglucomutase-2	no	0.379549	0.382481	0.810701	0.173122	0.289759	0.474349	0.517763	0.221133	0.0339876	0.107156	-0.44709	0.0431134	0	Phosphoglucomutase-2	0.436463	0.375751	0.134026	0.0714087	0.707285	0	0	0.0607122	1	0		Q9R0X4	Acyl-coenzyme A thioesterase 9, mitochondrial;Acyl-coenzyme A thioesterase 10, mitochondrial	0.522458	0.554634	1.3598	0.481364	0.443819	0.614514	0.681404	0.624599	0.0831111	0.139208	-0.733028	0.208018
O35350	Calpain-1 catalytic subunit	no		0.740602	0.123641	0.510795		0.922492	-0.00130205	0.886361		0.0253636	0.100168	0.233774	0	Calpain-1 catalytic subunit	0.458346	0.602517	0.180022	0.30209	0.707288	0	0	-0.144171	0	1		Q9QXC1	Fetuin-B		0.912754	0.672742	0.819037		1.06266	0.162339	1.28983		0.0574155	-0.18577	0.398679
P30416	Peptidyl-prolyl cis-trans isomerase FKBP4;Peptidyl-prolyl cis-trans isomerase FKBP4, N-terminally processed;Peptidyl-prolyl cis-trans isomerase	no	-0.363371	-0.786532	-1.12747	-1.3919	-0.468469	-0.944218	-0.28956	-1.43189	0.00773737	-0.154229	0.694215	-0.12212	0	Peptidyl-prolyl cis-trans isomerase FKBP4;Peptidyl-prolyl cis-trans isomerase FKBP4, N-terminally processed;Peptidyl-prolyl cis-trans isomerase	-0.917318	-0.783535	0.222365	0.256493	0.707397	0	0	-0.133783	0	1		P31001	Desmin	-0.220463	-0.61438	-0.57837	-1.08366	-0.31441	-0.804054	-0.125919	-1.02843	0.0568609	-0.122177	0.408277	0.0427844
Q8CGA0	Protein phosphatase 1F	no		-0.325179	0.179908	-0.44509		-0.218911	0.170927	-0.256791		0.0679838	0.0120715	0.547824	0	Protein phosphatase 1F	-0.196787	-0.101592	0.191502	0.136698	0.708537	0	0	-0.0951954	0	1		Q9CU62	Structural maintenance of chromosomes protein 1A		-0.153027	0.729009	-0.136848		-0.0787465	0.334568	0.146675		0.100036	-0.273866	0.712728
P15327	Bisphosphoglycerate mutase;Phosphoglycerate mutase	no	0.407007	0.0920138	0.319744	0.927412	0.139782	0.770419	-0.431902	0.737487	-0.259102	0.627964	-0.824199	-0.264105	0	Bisphosphoglycerate mutase;Phosphoglycerate mutase	0.436544	0.303946	0.17658	0.284894	0.708687	0	0	0.132598	1	0		P32261	Antithrombin-III	0.549916	0.264166	0.868845	1.23565	0.293841	0.910583	-0.268261	1.14095	-0.209979	0.660016	-1.11014	-0.0992008
P07310	Creatine kinase M-type	no	-0.446327	-0.358272	-0.788054	-0.541394	-0.310832	-0.688108	0.333179	-0.98737	0.134712	-0.24579	1.09428	-0.445309	0	Creatine kinase M-type	-0.533512	-0.413283	0.0927201	0.284723	0.710546	0	0	-0.120229	0	1		P70404	Isocitrate dehydrogenase [NAD] subunit gamma 1, mitochondrial	-0.303419	-0.18612	-0.238953	-0.233152	-0.156772	-0.547943	0.49682	-0.583904	0.183836	-0.213738	0.808344	-0.280405
Q8QZR5	Alanine aminotransferase 1	no	-0.253886	0.0644363	-1.21882	-0.649317	-0.41755	-0.383346	-0.524798	-1.2746	-0.118076	-0.557756	0.679793	-0.688139	0	Alanine aminotransferase 1	-0.514396	-0.650074	0.276485	0.210345	0.71055	0	0	0.135677	1	0		Q9ERS2	NADH dehydrogenase [ubiquinone] 1 alpha subcomplex subunit 13	-0.110978	0.236588	-0.669717	-0.341075	-0.26349	-0.243181	-0.361157	-0.871134	-0.0689524	-0.525704	0.393856	-0.523235
E9QMK9	UPF0317 protein C14orf159 homolog, mitochondrial	no	-0.761603	-0.322322	-1.07294	-0.963044	-0.311507	-0.628371	-0.0555514	-1.54712	0.39321	-0.293846	1.035	-0.536271	0	UPF0317 protein C14orf159 homolog, mitochondrial	-0.779976	-0.635638	0.165611	0.32563	0.71097	0	0	-0.144339	0	1		O54724	Polymerase I and transcript release factor	-0.618694	-0.15017	-0.523836	-0.654802	-0.157447	-0.488206	0.10809	-1.14366	0.442333	-0.261794	0.749062	-0.371366
Q3UHX2	28 kDa heat- and acid-stable phosphoprotein	no	-0.347823	-1.02455	-0.757879	-0.933232	-0.625308	-1.00933	0.231531	-1.12059	-0.300233	0.189887	0.959947	0.0115462	0	28 kDa heat- and acid-stable phosphoprotein	-0.765871	-0.630923	0.149931	0.306434	0.711027	0	0	-0.134948	0	1		Q9CYR0	Single-stranded DNA-binding protein, mitochondrial	-0.204915	-0.852398	-0.208778	-0.62499	-0.471249	-0.869161	0.395172	-0.717123	-0.251109	0.221939	0.674009	0.176451
Q08857	Platelet glycoprotein 4	no	0.0636099	-1.11649	0.453565	0.300474	-0.152618	-0.801914	-0.019203	0.0405803	-0.197333	0.245219	-0.164955	-0.205015	0	Platelet glycoprotein 4	-0.0747093	-0.233289	0.356402	0.193795	0.713203	0	0	0.158579	1	0		E9PWE8	Dihydropyrimidinase-related protein 3	0.206518	-0.944334	1.00267	0.608716	0.00144204	-0.66175	0.144438	0.444047	-0.148209	0.277271	-0.450893	-0.0401111
Q9Z0F7	Gamma-synuclein	no	-0.119582	-0.343999	-1.11894		-0.233644	-0.780785	-1.01949		-0.0334832	-0.434106	-0.259823		0	Gamma-synuclein	-0.527509	-0.677973	0.302731	0.232606	0.714862	0	0	0.150465	1	0		P11352	Glutathione peroxidase 1	0.0233263	-0.171847	-0.569843		-0.0795847	-0.640621	-0.855849		0.0156403	-0.402054	-0.545761
Q3UQY4	Acylpyruvase FAHD1, mitochondrial	no	0.335391	1.28846	-0.580015	0.370638	-0.873673	0.892254	-0.301955	0.813991	-1.219	-0.327215	0.274292	0.437172	0	Acylpyruvase FAHD1, mitochondrial	0.353617	0.132654	0.381468	0.432319	0.714946	0	0	0.220963	1	0		D3YU59	LIM and calponin homology domains-containing protein 1	0.478299	1.46061	-0.030914	0.67888	-0.719614	1.03242	-0.138315	1.21746	-1.16987	-0.295164	-0.0116462	0.602077
O88456	Calpain small subunit 1;Calpain small subunit 2	no	0.738756	0.203588	0.61999	-0.17107	0.550281	0.198433	0.703307	0.306652	-0.0439392	0.140052	-0.108151	0.452582	0	Calpain small subunit 1;Calpain small subunit 2	0.347816	0.439668	0.207557	0.114611	0.715467	0	0	-0.0918522	0	1		Q61239	Protein farnesyltransferase/geranylgeranyltransferase type-1 subunit alpha	0.881665	0.37574	1.16909	0.137172	0.704341	0.338597	0.866947	0.710118	0.00518438	0.172103	-0.394089	0.617487
P49443	Protein phosphatase 1A	no	0.0323927	-0.213956	-0.118388	-0.363021	-0.188116	-0.166044	-0.00659725	-0.506863	-0.38046	-0.0697325	-0.0481418	-0.0690474	0	Protein phosphatase 1A	-0.165743	-0.216905	0.0830379	0.10477	0.715795	0	0	0.0511622	1	0		F6YBI4	EH domain-containing protein 1	0.175301	-0.0418037	0.430714	-0.054779	-0.0340569	-0.0258793	0.157044	-0.103397	-0.331336	-0.0376805	-0.33408	0.0958569
Q9DCS3	Trans-2-enoyl-CoA reductase, mitochondrial	no	-0.631784	-0.343103	-1.29424	-0.728105	-0.801075	-0.806557	-0.50421	-1.27318	-0.300285	-0.486795	1.19067	-0.501787	0	Trans-2-enoyl-CoA reductase, mitochondrial	-0.749308	-0.846255	0.19921	0.15887	0.717323	0	0	0.0969473	1	0		Q8BXK9	Chloride intracellular channel protein 5	-0.488876	-0.170951	-0.74514	-0.419863	-0.647016	-0.666393	-0.340569	-0.869714	-0.251161	-0.454743	0.904735	-0.336883
Q61598	Rab GDP dissociation inhibitor beta	no	0.435982	1.00338	0.311186	0.478778	0.162434	0.861424	0.200932	0.655097	-0.24924	-0.0739739	-0.142104	0.149154	0	Rab GDP dissociation inhibitor beta	0.557332	0.469971	0.152874	0.171869	0.71735	0	0	0.0873606	1	0		Q9JHR7	Insulin-degrading enzyme	0.57889	1.17553	0.860287	0.78702	0.316493	1.00159	0.364573	1.05856	-0.200117	-0.041922	-0.428042	0.314058
Q9D892	Inosine triphosphate pyrophosphatase	no	-0.590354	0.211039	-0.347216	-0.22198	-0.661212	0.219344	-0.496176	-0.396481	0.0271618	0.0539166	-0.250565	-0.0717498	0	Inosine triphosphate pyrophosphatase	-0.237128	-0.333631	0.167822	0.192237	0.718553	0	0	0.0965031	1	0		Q61553	Fascin	-0.447446	0.383191	0.201885	0.0862623	-0.507152	0.359509	-0.332535	0.0069851	0.0762854	0.0859685	-0.536503	0.0931545
O55126	Protein NipSnap homolog 2	no	0.768208	1.23579	-1.30134	0.388532	-0.0396926	0.636487	-0.78933	0.31774	-0.816635	-0.507026	0.708171	-0.0600309	0	Protein NipSnap homolog 2	0.272796	0.0313011	0.552577	0.306427	0.719029	0	0	0.241495	1	0		Q811I0	ATP synthase mitochondrial F1 complex assembly factor 1	0.911116	1.40794	-0.752243	0.696775	0.114367	0.776652	-0.625689	0.721206	-0.767511	-0.474974	0.422233	0.104873
P45376	Aldose reductase	no	-0.289408	0.101365	-0.88872	-0.279479	-0.384508	-0.250127	-0.373953	-0.694244	-0.0577768	-0.20638	0.405228	-0.352529	0	Aldose reductase	-0.33906	-0.425708	0.204556	0.0945677	0.719184	0	0	0.0866479	1	0	Q62059	Q8K182	Complement component C8 alpha chain	-0.146499	0.273518	-0.339619	0.0287636	-0.230448	-0.109962	-0.210312	-0.290778	-0.00865324	-0.174328	0.11929	-0.187625
P10518	Delta-aminolevulinic acid dehydratase	no	-0.141322	0.186061	-0.997039	-0.0536946	-0.26535	0.0678965	-0.674694	-0.603091	0.0358932	-0.292342	0.33166	-0.409367	0	Delta-aminolevulinic acid dehydratase	-0.251499	-0.36881	0.257966	0.170751	0.719512	0	0	0.117311	1	0		P60335	Poly(rC)-binding protein 1	0.00158601	0.358214	-0.447938	0.254547	-0.11129	0.208061	-0.511053	-0.199625	0.0850168	-0.26029	0.0457225	-0.244463
P61982	14-3-3 protein gamma;14-3-3 protein gamma, N-terminally processed	no	0.629822	-0.843083	0.170389	-0.880647	-0.259502	-0.916437	-0.00349515	-0.385626	-0.979504	-0.110997	-0.0763314	0.425338	0	14-3-3 protein gamma;14-3-3 protein gamma, N-terminally processed	-0.23088	-0.391265	0.376255	0.192259	0.721622	0	0	0.160385	1	0		Q05816	Fatty acid-binding protein, epidermal	0.77273	-0.670931	0.71949	-0.572405	-0.105442	-0.776273	0.160146	0.0178406	-0.93038	-0.0789446	-0.362269	0.590243
A2AUC9	0	no	0.0177538		-0.890949	-0.84946	-0.75005		-0.0772648	-0.483987	-0.91204		1.07337	0.3312	0	0	-0.574218	-0.437101	0.296228	0.195626	0.721827	0	0	-0.137117	0	1	O88492	A3KMP2	Tetratricopeptide repeat protein 38	0.160662		-0.341848	-0.541217	-0.595991		0.0863761	-0.0805212	-0.862916		0.787432	0.496104
Q9D0S9	Histidine triad nucleotide-binding protein 2, mitochondrial	no	-0.206106	-0.10167	-0.649848	-0.743444	-0.285768	-0.562182	-0.183191	-1.04242	-0.146255	-0.359925	0.445955	-0.383167	0	Histidine triad nucleotide-binding protein 2, mitochondrial	-0.425267	-0.51839	0.159274	0.192136	0.722301	0	0	0.0931232	1	0		Q8CI94	Glycogen phosphorylase, brain form	-0.0631981	0.0704817	-0.100747	-0.435202	-0.131708	-0.422018	-0.0195505	-0.638954	-0.0971315	-0.327873	0.160017	-0.218263
Q9CZ13	Cytochrome b-c1 complex subunit 1, mitochondrial	no	0.0942882	-0.262735	-1.19763	0.343571	0.379803	-0.0209048	-1.06959	0.406665	0.20547	0.117728	0.231935	0.171379	0	Cytochrome b-c1 complex subunit 1, mitochondrial	-0.255627	-0.0760078	0.33775	0.345324	0.722787	0	0	-0.179619	0	1		Q9CQA3	Succinate dehydrogenase [ubiquinone] iron-sulfur subunit, mitochondrial	0.237197	-0.0905825	-0.64853	0.651813	0.533862	0.11926	-0.905953	0.810131	0.254594	0.14978	-0.0540028	0.336283
P20108	Thioredoxin-dependent peroxide reductase, mitochondrial	no	0.0154288	-0.783608	-0.493211	-1.51025	-0.607834	-0.835624	0.500842	-1.12182	-0.662533	-0.293535	1.02172	0.295367	0	Thioredoxin-dependent peroxide reductase, mitochondrial	-0.692911	-0.516108	0.318577	0.354915	0.723729	0	0	-0.176802	0	1		Q80Y14	Glutaredoxin-related protein 5, mitochondrial	0.158337	-0.611456	0.0558898	-1.20201	-0.453775	-0.695459	0.664483	-0.718351	-0.61341	-0.261483	0.735782	0.460271
Q9D1I5	Methylmalonyl-CoA epimerase, mitochondrial	no	-0.42263	-1.12038	-0.931182	-1.05464	-0.724053	-1.58335	-0.247699	-1.51196	-0.330282	-0.280588	0.642533	-0.424883	0	Methylmalonyl-CoA epimerase, mitochondrial	-0.882208	-1.01676	0.158132	0.321892	0.725036	0	0	0.134556	1	0		Q8CGC7	Bifunctional glutamate/proline--tRNA ligase;Glutamate--tRNA ligase;Proline--tRNA ligase	-0.279722	-0.948227	-0.382081	-0.746399	-0.569993	-1.44318	-0.0840585	-1.10849	-0.281158	-0.248536	0.356595	-0.259979
Q9JK42	[Pyruvate dehydrogenase [lipoamide]] kinase isozyme 2, mitochondrial	no	-0.163893	0.562027	-0.66348	0.0454477	-0.234209	0.235838	-0.434684	-0.220238	-0.111101	-0.237332	0.311534	-0.361313	0	[Pyruvate dehydrogenase [lipoamide]] kinase isozyme 2, mitochondrial	-0.0549745	-0.163323	0.253791	0.141783	0.725559	0	0	0.108349	1	0	P01867	Q8BTY1	Kynurenine--oxoglutarate transaminase 1	-0.0209844	0.734179	-0.114379	0.35369	-0.0801489	0.376002	-0.271043	0.183228	-0.0619777	-0.205281	0.0255958	-0.196409
Q8BH58	TIP41-like protein	no	-0.0539527	0.102447	-0.369718	-0.0178857	-0.115764	0.13954	-0.302607	-0.269892	-0.138053	0.236622	0.0522023	-0.321033	0	TIP41-like protein	-0.0847772	-0.137181	0.100693	0.100834	0.725691	0	0	0.0524034	1	0		Q9WVA4	Transgelin-2	0.0889556	0.274599	0.179384	0.290356	0.0382958	0.279704	-0.138966	0.133575	-0.0889297	0.268674	-0.233736	-0.156129
D3Z041	Long-chain-fatty-acid--CoA ligase 1	no	-0.0100024	1.31899	0.947566	1.30603	1.17035	1.37206	-0.0137312	1.76045	1.08615	0.210764	-0.870721	0.261844	0	Long-chain-fatty-acid--CoA ligase 1	0.890646	1.07228	0.312307	0.382152	0.725971	0	0	-0.181635	0	1		Q9QUM9	Proteasome subunit alpha type-6	0.132906	1.49114	1.49667	1.61427	1.32441	1.51223	0.14991	2.16391	1.13527	0.242816	-1.15666	0.426748
P62737	Actin, aortic smooth muscle;Actin, alpha cardiac muscle 1;Actin, gamma-enteric smooth muscle	no	0.0872947	0.279826	-0.464221	0.436414	-0.76758	0.697651	-0.341865	0.196149	-0.891019	0.467322	0.0499273	-0.149692	0	Actin, aortic smooth muscle;Actin, alpha cardiac muscle 1;Actin, gamma-enteric smooth muscle	0.0848286	-0.0539113	0.196447	0.318802	0.726214	0	0	0.13874	1	0	P07356	E9QPE4	Meiosis arrest female protein 1	0.230203	0.451978	0.0848807	0.744656	-0.61352	0.837816	-0.178225	0.599615	-0.841896	0.499374	-0.236011	0.015212
P17183	Gamma-enolase;Enolase	no	-0.305853	0.311671	-1.11292	-0.719234	-0.217454	0.241822	-0.26764	-0.99811	0.107144	-0.0912462	0.58072	-0.212451	0	Gamma-enolase;Enolase	-0.456584	-0.310345	0.304507	0.256314	0.726278	0	0	-0.146238	0	1		Q99KC8	von Willebrand factor A domain-containing protein 5A	-0.162945	0.483823	-0.563817	-0.410992	-0.0633941	0.381987	-0.103999	-0.594644	0.156267	-0.0591943	0.294782	-0.0475471
P08249	Malate dehydrogenase, mitochondrial	no	-0.38336	-0.365356	-1.09413	-0.64795	-0.367999	-0.492471	-0.312554	-0.984191	0.000646565	-0.0939694	0.725508	-0.314857	0	Malate dehydrogenase, mitochondrial	-0.622698	-0.539303	0.169899	0.152992	0.727938	0	0	-0.0833944	0	1		Q9D0I9	Arginine--tRNA ligase, cytoplasmic	-0.240452	-0.193204	-0.545024	-0.339707	-0.213939	-0.352307	-0.148913	-0.580724	0.0497701	-0.0619175	0.43957	-0.149953
Q8VCT3	Aminopeptidase B	no	0.200329	-0.04617	0.257429	0.136059	0.347354	-0.403319	0.635778	0.315411	0.409153	-0.0547647	0.572937	0.16703	0	Aminopeptidase B	0.136912	0.223806	0.0658697	0.221107	0.727979	0	0	-0.0868942	0	1		P54728	UV excision repair protein RAD23 homolog B	0.343237	0.125982	0.80653	0.444302	0.501414	-0.263155	0.799419	0.718877	0.458277	-0.0227127	0.287	0.331935
P23591	GDP-L-fucose synthase	no		0.203214	0.287792	0.670051		0.77278	0.0376166	0.656179		0.637519	-0.268929	-0.0908099	0	GDP-L-fucose synthase	0.387019	0.488859	0.143607	0.228118	0.728137	0	0	-0.10184	0	1	P97443	Q9D113	DNL-type zinc finger protein		0.375366	0.836894	0.978293		0.912945	0.201258	1.05964		0.669571	-0.554867	0.0740944
E9QJT5	Acylphosphatase;Acylphosphatase-1	no	-0.125271	-1.32874	-0.393741	-0.765574	-0.51505	-1.35454	-0.206142	-1.07277	-0.406967	-0.0900142	0.384223	-0.282613	0	Acylphosphatase;Acylphosphatase-1	-0.653332	-0.787124	0.260611	0.260626	0.729049	0	0	0.133791	1	0		P09470	Angiotensin-converting enzyme;Angiotensin-converting enzyme, soluble form	0.0176369	-1.15659	0.155361	-0.457332	-0.36099	-1.21437	-0.0425014	-0.669299	-0.357844	-0.0579623	0.0982848	-0.117709
Q8BIJ6	Isoleucine--tRNA ligase, mitochondrial	no	0.691641	1.22864	-0.333236	0.402608	0.198134	0.584399	0.0616341	0.61995	-0.283215	-0.609625	0.385974	0.0722922	0	Isoleucine--tRNA ligase, mitochondrial	0.497414	0.366029	0.325498	0.139346	0.729122	0	0	0.131385	1	0		Q8K0Z7	Translational activator of cytochrome c oxidase 1	0.83455	1.4008	0.215865	0.71085	0.352193	0.724564	0.225275	1.02342	-0.234092	-0.577573	0.100036	0.237197
P17563	Selenium-binding protein 1;Selenium-binding protein 2	no	-0.429811	0.18139	-1.06479	-0.262602	-0.193756	0.0282015	-0.370419	-0.610984	0.25223	-0.132397	0.661228	-0.491221	0	Selenium-binding protein 1;Selenium-binding protein 2	-0.393953	-0.286739	0.258131	0.135392	0.729544	0	0	-0.107213	0	1		Q8VCA8	Secernin-2	-0.286903	0.353542	-0.515687	0.0456399	-0.0396959	0.168366	-0.206778	-0.207518	0.301354	-0.100345	0.37529	-0.326317
Q9EQH2	Endoplasmic reticulum aminopeptidase 1	no	0.00387735		-0.531892	-0.671021	-0.218253		-0.205207	-0.514631	-0.320306		0.154356	-0.178996	0	Endoplasmic reticulum aminopeptidase 1	-0.399678	-0.312697	0.205736	0.101037	0.730304	0	0	-0.0869815	0	1		O88342	WD repeat-containing protein 1	0.146786		0.0172092	-0.362779	-0.0641933		-0.0415656	-0.111165	-0.271183		-0.131582	-0.0140916
P34884	Macrophage migration inhibitory factor	no	0.184549	0.994739	-0.0567865	0.237477	0.156862	1.34297	0.00410225	0.398819	-0.277441	0.164303	-0.0361344	0.059383	0	Macrophage migration inhibitory factor	0.339995	0.475689	0.227449	0.300297	0.731907	0	0	-0.135695	0	1		P97384	Annexin A11;Annexin	0.327457	1.16689	0.492315	0.545719	0.310922	1.48314	0.167743	0.802285	-0.228317	0.196355	-0.322072	0.224287
O35459	Delta(3,5)-Delta(2,4)-dienoyl-CoA isomerase, mitochondrial	no	-0.597909	-0.448708	-1.75593	-0.489154	-0.637681	-0.533361	-0.601381	-1.03182	0.00953924	-0.0781237	1.07128	-0.664388	0	Delta(3,5)-Delta(2,4)-dienoyl-CoA isomerase, mitochondrial	-0.822925	-0.701061	0.312593	0.112353	0.733409	0	0	-0.121864	0	1		Q9CQM9	Glutaredoxin-3	-0.455	-0.276556	-1.20683	-0.180912	-0.483622	-0.393197	-0.43774	-0.628354	0.0586628	-0.0460718	0.785341	-0.499483
Q61553	Fascin	no	0.480678	1.0821	0.85553	0.378582	0.331573	1.14438	0.239736	0.709414	-0.272548	0.0575818	-0.561606	0.110341	0	Fascin	0.699223	0.606276	0.163708	0.206157	0.736706	0	0	0.0929469	1	0		P21981	Protein-glutamine gamma-glutamyltransferase 2	0.623586	1.25425	1.40463	0.686824	0.485633	1.28455	0.403377	1.11288	-0.223424	0.0896338	-0.847544	0.275245
Q62048	Astrocytic phosphoprotein PEA-15	no	0.365419	-1.09967	0.770748	-0.449544	0.229327	-1.09644	0.205295	-0.489163	-0.20379	0.14593	-0.417141	0.142058	0	Astrocytic phosphoprotein PEA-15	-0.103262	-0.287746	0.417961	0.316888	0.737912	0	0	0.184485	1	0		P51881	ADP/ATP translocase 2	0.508327	-0.927517	1.31985	-0.141302	0.383386	-0.95628	0.368936	-0.0856966	-0.154667	0.177981	-0.703079	0.306962
Q9D8W5	26S proteasome non-ATPase regulatory subunit 12	no	-0.070871	0.943852	-0.0190305		0.648671	1.11089	-0.326295		0.793091	0.117337	-0.308658		0	26S proteasome non-ATPase regulatory subunit 12	0.28465	0.477757	0.32994	0.423591	0.738322	0	0	-0.193106	0	1		Q3UZG4	Aminoacyl tRNA synthase complex-interacting multifunctional protein 1;Endothelial monocyte-activating polypeptide 2	0.0720372	1.116	0.530071		0.802731	1.25106	-0.162654		0.842214	0.149389	-0.594596
P54822	Adenylosuccinate lyase	no	0.00205175	0.735532	-0.772003	0.567112	-0.431646	0.805418	-0.0250885	0.827643	-0.309638	0.130674	0.963559	0.327616	0	Adenylosuccinate lyase	0.133173	0.294081	0.340058	0.312877	0.73965	0	0	-0.160908	0	1		Q64433	10 kDa heat shock protein, mitochondrial	0.14496	0.907684	-0.222902	0.875354	-0.277586	0.945582	0.138552	1.23111	-0.260515	0.162726	0.677621	0.49252
Q9R1P1	Proteasome subunit beta type-3	no	0.104412	0.860886	0.147338	0.56743	0.496337	1.29443	-0.340104	0.774187	0.217873	0.223993	-0.160407	0.26613	0	Proteasome subunit beta type-3	0.420016	0.556214	0.180291	0.341498	0.740058	0	0	-0.136197	0	1		Q11011	Puromycin-sensitive aminopeptidase	0.24732	1.03304	0.696439	0.875672	0.650397	1.4346	-0.176463	1.17765	0.266996	0.256045	-0.446345	0.431034
Q9DB15	39S ribosomal protein L12, mitochondrial	no	-0.395615	-1.23137		-0.954128	0.381297	-1.50932		-0.790498	0.918857	-0.098857		0.231036	0	39S ribosomal protein L12, mitochondrial	-0.860371	-0.639508	0.245774	0.550972	0.740489	0	0	-0.220863	0	1		P10649	Glutathione S-transferase Mu 1	-0.252707	-1.05922		-0.645886	0.535356	-1.36916		-0.387032	0.96798	-0.0668051		0.39594
P51174	Long-chain specific acyl-CoA dehydrogenase, mitochondrial	no	-0.182841	0.652675	-1.05414	0.394202	-0.0206276	0.269976	-0.131258	0.253228	0.231476	-0.150826	1.00744	-0.126468	0	Long-chain specific acyl-CoA dehydrogenase, mitochondrial	-0.0475268	0.0928297	0.378263	0.100082	0.740845	0	0	-0.140357	0	1		P61205	ADP-ribosylation factor 3;ADP-ribosylation factor 1;ADP-ribosylation factor 2	-0.0399332	0.824827	-0.505042	0.702445	0.133432	0.410141	0.0323829	0.656695	0.2806	-0.118774	0.721504	0.0384361
Q9JLZ3	Methylglutaconyl-CoA hydratase, mitochondrial	no	-0.494204	-0.231923	-0.875436	-0.0570124	-0.611455	-0.255331	-0.5892	-0.479067	-0.13922	-0.137991	0.312384	-0.53366	0	Methylglutaconyl-CoA hydratase, mitochondrial	-0.414644	-0.483763	0.177939	0.0814584	0.740944	0	0	0.0691196	1	0	E9QLJ0	A2BIN1	Major urinary protein 6;Major urinary protein 2;Major urinary protein 1;Major urinary proteins 11 and 8	-0.351295	-0.0597706	-0.326335	0.25123	-0.457395	-0.115166	-0.425559	-0.0756011	-0.0900964	-0.105939	0.0264459	-0.368756
F7DBB3	0	no		0.240368	2.08978	0.445362		1.01859	0.911481	1.52812		0.674501	-1.01625	1.17771	0	0	0.925171	1.15273	0.585305	0.190227	0.741506	0	0	-0.22756	0	1		Q8BP40	Lysophosphatidic acid phosphatase type 6		0.41252	2.63889	0.753604		1.15875	1.07512	1.93159		0.706553	-1.30219	1.34261
Q9CZL5	Pterin-4-alpha-carbinolamine dehydratase 2	no	-0.379973	-2.03355	-0.90639	-1.70867	-0.975874	-1.88204	0.158518	-1.52951	-0.688815	-0.110296	1.13993	-0.0384601	0	Pterin-4-alpha-carbinolamine dehydratase 2	-1.25715	-1.05723	0.376292	0.446097	0.743935	0	0	-0.199919	0	1		Q9QYJ0	DnaJ homolog subfamily A member 2	-0.237065	-1.8614	-0.357289	-1.40043	-0.821815	-1.74188	0.322159	-1.12605	-0.639692	-0.0782438	0.853996	0.126444
F8WIT2	Annexin	no		-0.160695	0.0996403	-0.236199		-0.258258	0.1614	-0.411379		-0.0564658	0.136817	-0.0496047	0	Annexin	-0.0990847	-0.169413	0.101725	0.171211	0.745628	0	0	0.0703279	1	0		Q9D967	Magnesium-dependent phosphatase 1		0.0114571	0.648741	0.0720429		-0.118094	0.325041	-0.00791302		-0.0244139	-0.149121	0.1153
Q8R3B1	1-phosphatidylinositol 4,5-bisphosphate phosphodiesterase delta-1	no	-0.0454322	1.12354	-0.170701	1.34693	-0.107499	1.17597	-0.0984822	0.608791	-0.0912535	0.155082	-0.0980808	-0.686709	0	1-phosphatidylinositol 4,5-bisphosphate phosphodiesterase delta-1	0.563585	0.394695	0.391286	0.309791	0.747171	0	0	0.16889	1	0		Q8BT60	Copine-3	0.097476	1.2957	0.378401	1.65517	0.0465609	1.31613	0.0651587	1.01226	-0.0421299	0.187134	-0.384019	-0.521805
O35226	26S proteasome non-ATPase regulatory subunit 4	no	0.211882	-0.594385	-1.76901		0.916673	-0.640253	-1.4864		0.754847	0.0501056	0.391884		0	26S proteasome non-ATPase regulatory subunit 4	-0.717171	-0.403326	0.57512	0.703749	0.747905	0	0	-0.313845	0	1		Q62234	Myomesin-1	0.354791	-0.422233	-1.21991		1.07073	-0.500088	-1.32276		0.803971	0.0821575	0.105946
Q8CAK1	Putative transferase CAF17 homolog, mitochondrial	no	0.0362205	0.258649	-1.23235	0.110841	-0.00207103	0.452842	-0.518991	-0.216416	-0.0171638	0.105714	0.717828	-0.378141	0	Putative transferase CAF17 homolog, mitochondrial	-0.206661	-0.0711591	0.345007	0.204329	0.749482	0	0	-0.135502	0	1		P19123	Troponin C, slow skeletal and cardiac muscles	0.179129	0.430801	-0.683252	0.419083	0.151989	0.593006	-0.35535	0.18705	0.0319598	0.137766	0.43189	-0.213236
Q99LX0	Protein DJ-1	no	-0.246117	-1.47304	-0.362094	-0.867097	-0.456304	-1.55987	-0.225393	-1.27389	-0.28629	0.0387495	0.202078	-0.322239	0	Protein DJ-1	-0.737086	-0.878863	0.27991	0.319556	0.750122	0	0	0.141777	1	0		Q9DCZ1	GMP reductase 1	-0.103209	-1.30089	0.187007	-0.558855	-0.302244	-1.4197	-0.0617518	-0.870424	-0.237166	0.0708015	-0.0838597	-0.157335
Q61247	Alpha-2-antiplasmin	no	-0.339995	-0.650451	0.518744	-0.0962595	-0.258168	-0.675421	0.336141	-0.4075	-0.0482582	-0.186574	-0.307939	-0.225422	0	Alpha-2-antiplasmin	-0.141991	-0.251237	0.247723	0.213973	0.750163	0	0	0.109246	1	0		Q9WTP6	Adenylate kinase 2, mitochondrial	-0.197087	-0.478299	1.06784	0.211983	-0.104108	-0.535257	0.499782	-0.00403388	0.000865329	-0.154522	-0.593877	-0.0605176
Q61171	Peroxiredoxin-2	no	-0.22385	-1.1064	-0.0837013	-0.879191	-0.0145901	-0.805921	-0.15415	-0.875434	0.209094	0.406134	-0.0450535	-0.0183794	0	Peroxiredoxin-2	-0.573287	-0.462524	0.248259	0.220635	0.750262	0	0	-0.110763	0	1	P00405	Q9D8U8	Sorting nexin-5	-0.0809422	-0.934252	0.4654	-0.570949	0.139469	-0.665757	0.00949053	-0.471968	0.258217	0.438186	-0.330991	0.146525
Q9D0F9	Phosphoglucomutase-1	no	-0.330599	-0.236759	-0.658647	-0.56887	-0.425155	-0.366673	-0.348459	-0.863947	-0.0874262	-0.0476303	0.312101	-0.352661	0	Phosphoglucomutase-1	-0.448719	-0.501058	0.0989045	0.122064	0.750824	0	0	0.0523397	1	0	Q62465	A2AQ53	Fibrillin-1	-0.187691	-0.0646069	-0.109546	-0.260628	-0.271096	-0.226509	-0.184818	-0.460481	-0.0383026	-0.0155783	0.0261627	-0.187756
Q8BT60	Copine-3	no	0.333214	0.794957	0.476353	-0.226995	0.336202	0.919782	0.280072	0.200637	0.0900839	0.0464212	-0.284098	0.348182	0	Copine-3	0.344382	0.434173	0.213508	0.164241	0.750943	0	0	-0.089791	0	1		F6Y3F4	Ribosyldihydronicotinamide dehydrogenase [quinone]	0.476122	0.967109	1.02545	0.0812474	0.490262	1.05995	0.443713	0.604104	0.139208	0.0784732	-0.570036	0.513086
F7AXC4	Parathymosin	no	0.454504	0.0752363	0.716216	-0.0107224	0.352847	0.0350596	0.174698	0.416488	-0.231599	0.381217	-0.595676	0.307376	0	Parathymosin	0.308808	0.244773	0.169279	0.0866296	0.751531	0	0	0.0640353	1	0		P62071	Ras-related protein R-Ras2	0.597412	0.247388	1.26532	0.29752	0.506907	0.175224	0.338339	0.819954	-0.182475	0.413269	-0.881614	0.47228
Q62261	Spectrin beta chain, brain 1	no	-0.364313	-0.774799	0.665335	-0.502455	-0.742829	-0.381639	-0.351693	0.0274316	-0.448778	0.524941	-1.07975	0.635758	0	Spectrin beta chain, brain 1	-0.244058	-0.362182	0.314896	0.157369	0.752571	0	0	0.118124	1	0		E9Q3P4		-0.221405	-0.602647	1.21444	-0.194213	-0.588769	-0.241474	-0.188052	0.430898	-0.399654	0.556993	-1.36569	0.800662
Q01279	Epidermal growth factor receptor	no	-0.441475	-1.48621	0.40584	0.0291878	-0.298532	-1.12879	0.560136	0.0900944	0.202202	0.21709	0.261715	-0.0924555	0	Epidermal growth factor receptor	-0.373164	-0.194274	0.409499	0.357561	0.753488	0	0	-0.17889	0	1		F7DBB3		-0.298566	-1.31406	0.954941	0.33743	-0.144473	-0.98863	0.723777	0.493561	0.251325	0.249142	-0.0242231	0.0724488
D3Z7X0	0	no	-0.187982	0.134974	-1.25277	-0.0692039	-0.478009	0.0766556	-1.05729	-0.424093	-0.324857	-0.168859	0.373401	-0.406021	0	0	-0.343745	-0.470685	0.310259	0.232005	0.755158	0	0	0.12694	1	0		Q6P8I4	PEST proteolytic signal-containing nuclear protein	-0.0450741	0.307127	-0.703666	0.239038	-0.323949	0.21682	-0.893652	-0.0206267	-0.275734	-0.136807	0.0874628	-0.241117
Q3ULJ0	Glycerol-3-phosphate dehydrogenase 1-like protein	no	-0.37678	-0.288783	-0.450682	-0.746216	-0.188515	-0.594867	-0.245224	-1.1569	0.0827293	-0.191883	0.325778	-0.451525	0	Glycerol-3-phosphate dehydrogenase 1-like protein	-0.465615	-0.546376	0.099214	0.222457	0.756299	0	0	0.0807615	1	0		Q9CR21	Acyl carrier protein, mitochondrial;Acyl carrier protein	-0.233871	-0.116631	0.0984196	-0.437973	-0.0344558	-0.454702	-0.0815832	-0.753433	0.131853	-0.159831	0.0398403	-0.286621
P61161	Actin-related protein 2	no	0.3723	1.09163	0.932766	1.2212	0.281782	1.19452	0.982362	1.59169	-0.10539	0.251633	0.506763	0.461301	0	Actin-related protein 2	0.904476	1.01259	0.18694	0.274386	0.757193	0	0	-0.108113	0	1		E9QMK9	UPF0317 protein C14orf159 homolog, mitochondrial	0.515208	1.26378	1.48187	1.52945	0.435842	1.33468	1.146	1.99516	-0.0562662	0.283685	0.220825	0.626205
P10711	Transcription elongation factor A protein 1	no	0.272742	-0.813975	0.482153		0.15663	-0.762439	0.0519756		-0.0272174	0.167071	-0.0663332		0	Transcription elongation factor A protein 1	-0.0196935	-0.184611	0.401716	0.290489	0.757637	0	0	0.164918	1	0		P26883	Peptidyl-prolyl cis-trans isomerase FKBP1A	0.41565	-0.641823	1.03125		0.310689	-0.622274	0.215616		0.0219061	0.199123	-0.352271
P10605	Cathepsin B;Cathepsin B light chain;Cathepsin B heavy chain	no	0.329372	-0.56315	-0.0437184	-0.526341	-0.173844	-0.500585	0.052224	-0.505923	-0.524157	0.0447808	0.0641465	-0.00540427	0	Cathepsin B;Cathepsin B light chain;Cathepsin B heavy chain	-0.20096	-0.282032	0.212727	0.135808	0.760791	0	0	0.0810725	1	0		P16675	Lysosomal protective protein;Lysosomal protective protein 32 kDa chain;Lysosomal protective protein 20 kDa chain	0.47228	-0.390998	0.505383	-0.218099	-0.0197846	-0.36042	0.215865	-0.102457	-0.475034	0.0768327	-0.221791	0.1595
Q7TQI3	Ubiquitin thioesterase OTUB1	no	-0.263469	-0.290778	-0.39154	-0.4422	0.00544037	-0.464514	-0.148572	-0.591487	0.198196	-0.226859	0.0563187	-0.0652725	0	Ubiquitin thioesterase OTUB1	-0.346997	-0.299783	0.0420171	0.137917	0.761685	0	0	-0.0472136	0	1		P54775	26S protease regulatory subunit 6B	-0.120561	-0.118626	0.157561	-0.133958	0.1595	-0.32435	0.0150693	-0.188021	0.24732	-0.194807	-0.229619	0.0996318
Q8QZS1	3-hydroxyisobutyryl-CoA hydrolase, mitochondrial	no	-0.336741	0.182183	-0.683911	-0.328869	-0.110295	0.12414	-0.319545	-0.567609	0.183046	-0.102155	0.294998	-0.265249	0	3-hydroxyisobutyryl-CoA hydrolase, mitochondrial	-0.291834	-0.218327	0.178373	0.147535	0.761952	0	0	-0.0735072	0	1		Q8WTY4	Anamorsin	-0.193833	0.354335	-0.13481	-0.0206267	0.0437644	0.264304	-0.155904	-0.164143	0.23217	-0.0701029	0.00906043	-0.100345
P97493	Thioredoxin, mitochondrial	no	-0.446451	-1.56546	-1.24676	-1.09709	-0.898353	-1.72267	-0.976152	-1.13934	-0.235353	-0.0954913	0.640954	0.139607	0	Thioredoxin, mitochondrial	-1.08894	-1.18413	0.235378	0.186404	0.762513	0	0	0.0951859	1	0		P24369	Peptidyl-prolyl cis-trans isomerase B	-0.303543	-1.39331	-0.697663	-0.788853	-0.744294	-1.58251	-0.812511	-0.735869	-0.186229	-0.0634393	0.355016	0.304511
P47738	Aldehyde dehydrogenase, mitochondrial	no	-0.225774	0.136403	-0.565146	-0.30479	-0.148875	0.012865	-0.0125615	-0.562062	0.0781135	-0.171463	0.56428	-0.267664	0	Aldehyde dehydrogenase, mitochondrial	-0.239827	-0.177658	0.144856	0.132963	0.762657	0	0	-0.0621685	0	1		P70168	Importin subunit beta-1	-0.0828661	0.308555	-0.0160451	0.00345221	0.00518438	0.153029	0.151079	-0.158596	0.127237	-0.139411	0.278342	-0.10276
Q9DCL8	Protein phosphatase inhibitor 2	no	-0.236356		-0.598678	-1.11097	-0.216083		-0.0378576	-1.24785	0.143197		0.60648	-0.0798875	0	Protein phosphatase inhibitor 2	-0.648669	-0.500597	0.253714	0.377153	0.763124	0	0	-0.148072	0	1		P15327	Bisphosphoglycerate mutase;Phosphoglycerate mutase	-0.093448		-0.0495763	-0.802731	-0.0620229		0.125783	-0.844386	0.192321		0.320543	0.0850168
O09131	Glutathione S-transferase omega-1	no	-0.00684815	0.744464	-0.38973	0.306227	-0.0551012	0.763655	-0.386375	-0.102289	-0.0226776	0.0902895	0.083947	-0.457768	0	Glutathione S-transferase omega-1	0.163528	0.0549724	0.240308	0.247296	0.76357	0	0	0.108556	1	0		F8WI94	Sarcoplasmic/endoplasmic reticulum calcium ATPase 2	0.13606	0.916616	0.159371	0.61447	0.0989585	0.903819	-0.222734	0.301177	0.0264459	0.122341	-0.201991	-0.292864
Q61425	Hydroxyacyl-coenzyme A dehydrogenase, mitochondrial	no	-0.274822	0.254163	-1.20794	-0.417402	-0.397395	-0.210829	-0.681929	-0.778645	-0.12437	-0.421503	0.52668	-0.364242	0	Hydroxyacyl-coenzyme A dehydrogenase, mitochondrial	-0.411499	-0.517199	0.302232	0.13029	0.763878	0	0	0.1057	1	0		Q9Z1A1		-0.131914	0.426315	-0.658834	-0.10916	-0.243335	-0.0706641	-0.518288	-0.375179	-0.0752464	-0.389451	0.240742	-0.199338
Q8BYM8	Probable cysteine--tRNA ligase, mitochondrial	no	0.172194	1.14312	-0.697502	0.691383	-0.0833955	1.18187	0.17561	0.64015	-0.448835	-0.11243	0.708386	0.181173	0	Probable cysteine--tRNA ligase, mitochondrial	0.327298	0.478559	0.39501	0.278138	0.765967	0	0	-0.151261	0	1		Q3TMH2	Secernin-3	0.315102	1.31527	-0.148401	0.999625	0.0706641	1.32204	0.339251	1.04362	-0.399711	-0.0803777	0.422448	0.346078
Q9D6J6	NADH dehydrogenase [ubiquinone] flavoprotein 2, mitochondrial	no	-0.258506	-1.8657	-0.560137	-1.18048	-0.14328	-1.65446	-0.257135	-1.17561	0.220388	0.17259	0.306849	-0.0882084	0	NADH dehydrogenase [ubiquinone] flavoprotein 2, mitochondrial	-0.966204	-0.807621	0.355988	0.364799	0.766238	0	0	-0.158583	0	1		Q60864	Stress-induced-phosphoprotein 1	-0.115598	-1.69354	-0.0110354	-0.872238	0.0107799	-1.5143	-0.0934941	-0.772139	0.269512	0.204642	0.0209111	0.0766959
Q9QUH0	Glutaredoxin-1	no	-0.131269	-0.794052	-0.520249	-0.622533	-0.113237	-0.727529	0.0473713	-0.930937	-0.0259393	0.0683876	0.720606	-0.0976785	0	Glutaredoxin-1	-0.517026	-0.431083	0.140444	0.235881	0.767148	0	0	-0.0859426	0	1		Q80X50	Ubiquitin-associated protein 2-like	0.0116388	-0.6219	0.028852	-0.31429	0.0408223	-0.587365	0.211012	-0.527471	0.0231843	0.10044	0.434668	0.0672257
P11152	Lipoprotein lipase	no		0.730884	-0.284985	0.119722		0.74982	-0.204034	0.405906		-0.719851	-0.036856	0.436887	0	Lipoprotein lipase	0.18854	0.317231	0.295268	0.278901	0.767259	0	0	-0.12869	0	1		P63254	Cysteine-rich protein 1		0.903037	0.264116	0.427964		0.889984	-0.040393	0.809373		-0.6878	-0.322794	0.601792
Q3U3G8	Serine hydrolase-like protein	no	0.242136	0.875693	-0.45149	0.979153	0.253674	0.918489	-0.51216	0.438688	-0.0980133	-0.166814	-0.113336	-0.367825	0	Serine hydrolase-like protein	0.411373	0.274673	0.330548	0.297342	0.768995	0	0	0.1367	1	0		O70492	Sorting nexin-3	0.385044	1.04784	0.0976109	1.2874	0.407733	1.05865	-0.348519	0.842154	-0.0488897	-0.134762	-0.399274	-0.202921
P17742	Peptidyl-prolyl cis-trans isomerase A;Peptidyl-prolyl cis-trans isomerase	no	0.386563	0.131534	0.423371	-0.459062	0.131283	0.110258	0.197454	-0.23876	-0.252327	-0.0209858	-0.254987	0.126581	0	Peptidyl-prolyl cis-trans isomerase A;Peptidyl-prolyl cis-trans isomerase	0.120601	0.0500589	0.203825	0.0980488	0.769615	0	0	0.0705424	1	0		Q9D0S9	Histidine triad nucleotide-binding protein 2, mitochondrial	0.529471	0.303686	0.972472	-0.15082	0.285343	0.250423	0.361095	0.164707	-0.203203	0.0110662	-0.540925	0.291486
F7ABS0	SH3 domain-binding glutamic acid-rich protein	no	-0.309702	-1.60265	-1.29245	-0.776773	-0.549191	-1.48471	-0.0842117	-1.32916	-0.0865968	0.365203	1.38543	-0.352332	0	SH3 domain-binding glutamic acid-rich protein	-0.995395	-0.861819	0.28504	0.330254	0.77002	0	0	-0.133576	0	1		Q8K1Z0	Ubiquinone biosynthesis protein COQ9, mitochondrial	-0.166794	-1.4305	-0.743352	-0.468531	-0.395132	-1.34455	0.0794293	-0.925696	-0.0374732	0.397255	1.0995	-0.187428
Q9D0K2	Succinyl-CoA:3-ketoacid-coenzyme A transferase 1, mitochondrial	no	-0.053817	0.349197	-0.228328	0.0436238	-0.162814	0.246625	0.0232399	-0.18926	0.0515849	-0.0765903	0.138656	-0.149121	0	Succinyl-CoA:3-ketoacid-coenzyme A transferase 1, mitochondrial	0.027669	-0.0205524	0.12104	0.100831	0.770201	0	0	0.0482214	1	0		Q9CZL5	Pterin-4-alpha-carbinolamine dehydratase 2	0.0890913	0.521349	0.320773	0.351866	-0.0087548	0.386789	0.186881	0.214207	0.100709	-0.0445384	-0.147282	0.015783
Q9CRC3	UPF0235 protein C15orf40 homolog	no		-1.31972	-0.683262	-0.921302		-1.32876	-0.446431	-1.50559		0.0230049	0.39376	-0.637894	0	UPF0235 protein C15orf40 homolog	-0.974761	-1.09359	0.185664	0.327582	0.771993	0	0	0.11883	1	0		Q9D8S9	BolA-like protein 1		-1.14757	-0.13416	-0.61306		-1.18859	-0.28279	-1.10212		0.0550568	0.107822	-0.47299
Q9D819	Inorganic pyrophosphatase	no	-0.0935562	-0.994107	-0.0326826	-0.788404	-0.177066	-0.754356	0.238863	-0.795564	-0.00354085	0.15989	-0.0128591	0.178333	0	Inorganic pyrophosphatase	-0.477187	-0.372031	0.24304	0.247783	0.772142	0	0	-0.105157	0	1		Q8R2Y2	Cell surface glycoprotein MUC18	0.049352	-0.821955	0.516419	-0.480162	-0.0230059	-0.614192	0.402504	-0.392097	0.0455827	0.191942	-0.298797	0.343237
E9Q3H6	0	no	0.275552	0.767247	-1.27347	0.782377	-0.00792573	0.723408	-0.509499	1.07778	-0.440049	-0.170081	0.662451	0.273495	0	0	0.137925	0.32094	0.48497	0.35737	0.772411	0	0	-0.183015	0	1		F8VPN4		0.41846	0.939399	-0.724373	1.09062	0.146134	0.863572	-0.345858	1.48124	-0.390926	-0.138029	0.376513	0.438399
Q3TZ89	Protein transport protein Sec31B	no	0.240589	1.19238	-0.950164	0.19457	0.619684	0.825732	-0.215234	0.0604411	0.430935	-0.0882131	0.802155	-0.181898	0	Protein transport protein Sec31B	0.169344	0.322656	0.438332	0.241418	0.772518	0	0	-0.153312	0	1		Q8QZT1	Acetyl-CoA acetyltransferase, mitochondrial	0.383497	1.36453	-0.401063	0.502812	0.773743	0.965897	-0.0515936	0.463907	0.480058	-0.0561612	0.516217	-0.0169936
P00493	Hypoxanthine-guanine phosphoribosyltransferase	no	0.448101	0.751782	0.547498	0.511839	0.688718	0.920414	-0.0345557	0.987687	0.155893	0.245576	-0.508595	0.359159	0	Hypoxanthine-guanine phosphoribosyltransferase	0.564805	0.640566	0.0656284	0.233972	0.773034	0	0	-0.0757608	0	1		Q9DAK9	14 kDa phosphohistidine phosphatase	0.591009	0.923934	1.0966	0.820081	0.842778	1.06058	0.129085	1.39115	0.205017	0.277628	-0.794532	0.524064
Q99JI4	26S proteasome non-ATPase regulatory subunit 6	no	-0.121002	1.09441	0.311186	0.563887	0.594573	0.986795	-0.114707	0.795789	0.555992	0.0112926	-0.501978	0.135044	0	26S proteasome non-ATPase regulatory subunit 6	0.46212	0.565612	0.253797	0.240494	0.777239	0	0	-0.103493	0	1		Q99JW2	Aminoacylase-1	0.0219061	1.26656	0.860287	0.872129	0.748633	1.12696	0.0489337	1.19925	0.605115	0.0433446	-0.787916	0.299948
Q61166	Microtubule-associated protein RP/EB family member 1	no	0.427458		0.138945	0.0388263	-0.0974761		-0.258151	0.671902	-0.300645		-0.391695	0.529397	0	Microtubule-associated protein RP/EB family member 1	0.201743	0.105425	0.116499	0.287011	0.778728	0	0	0.0963181	1	0		O35215	D-dopachrome decarboxylase	0.570366		0.688046	0.347068	0.0565835		-0.0945104	1.07537	-0.251522		-0.677633	0.694301
Q07417	Short-chain specific acyl-CoA dehydrogenase, mitochondrial	no	-0.224736	0.364707	-0.999205	-0.117179	-0.548338	0.137195	-0.48994	-0.460605	-0.399297	-0.257752	0.493081	-0.294212	0	Short-chain specific acyl-CoA dehydrogenase, mitochondrial	-0.244103	-0.340422	0.282447	0.160246	0.779297	0	0	0.0963185	1	0		Q9CQC7	NADH dehydrogenase [ubiquinone] 1 beta subcomplex subunit 4	-0.0818275	0.536859	-0.450104	0.191063	-0.394278	0.277359	-0.326299	-0.0571383	-0.350173	-0.2257	0.207143	-0.129308
Q6GT24	Peroxiredoxin-6	no	-0.132988		-0.405969	-0.719885	-0.28291		-0.275476	-0.953283	-0.13508		0.116988	-0.186445	0	Peroxiredoxin-6	-0.419614	-0.50389	0.16956	0.224707	0.780625	0	0	0.0842757	1	0	Q8BG40	Q8BTM8	Filamin-A	0.00992034		0.143132	-0.411643	-0.12885		-0.111835	-0.549817	-0.085956		-0.16895	-0.0215407
Q8BMS1	Trifunctional enzyme subunit alpha, mitochondrial;Long-chain enoyl-CoA hydratase;Long chain 3-hydroxyacyl-CoA dehydrogenase	no	0.391651	1.11429	-1.23737	0.390521	0.961706	0.759988	-1.05917	0.793935	0.652559	-0.315614	0.232235	0.405559	0	Trifunctional enzyme subunit alpha, mitochondrial;Long-chain enoyl-CoA hydratase;Long chain 3-hydroxyacyl-CoA dehydrogenase	0.164775	0.364115	0.497495	0.476473	0.78205	0	0	-0.19934	0	1		Q9D404	3-oxoacyl-[acyl-carrier-protein] synthase, mitochondrial	0.53456	1.28645	-0.688264	0.698763	1.11577	0.900153	-0.895529	1.1974	0.701682	-0.283562	-0.0537033	0.570463
P35700	Peroxiredoxin-1	no	-0.0621141	-0.554211	0.0544005	-0.926293	-0.0207592	-0.527306	0.169439	-0.750452	0.0540047	0.122531	0.0712457	0.0788867	0	Peroxiredoxin-1	-0.372054	-0.28227	0.226989	0.214411	0.783397	0	0	-0.0897848	0	1		Q91V41	Ras-related protein Rab-14	0.0807941	-0.382059	0.603502	-0.618051	0.1333	-0.387142	0.33308	-0.346985	0.103128	0.154583	-0.214692	0.243791
Q9CZD3	Glycine--tRNA ligase	no	-0.100544		0.0943857	-0.521869	-0.0889009		-0.0232548	-0.23939	0.223975		-0.0274137	0.23749	0	Glycine--tRNA ligase	-0.176009	-0.117182	0.181855	0.0639752	0.783949	0	0	-0.0588273	0	1	Q91WD5	Q561M1	Low molecular weight phosphotyrosine protein phosphatase	0.0423642		0.643487	-0.213627	0.0651587		0.140386	0.164076	0.273098		-0.313352	0.402395
P08207	Protein S100-A10	no	0.328019	-0.384535	1.49941	0.435979	0.0870484	-0.225725	0.867825	0.620009	-0.305238	0.138258	-0.798702	0.288218	0	Protein S100-A10	0.469719	0.337289	0.388505	0.248496	0.78529	0	0	0.13243	1	0		P97927	Laminin subunit alpha-4	0.470927	-0.212383	2.04852	0.744221	0.241108	-0.0855606	1.03147	1.02347	-0.256115	0.17031	-1.08464	0.453122
Q64726	Zinc-alpha-2-glycoprotein	no	0.396722	-0.858944	0.527458		0.86051	-0.563904	0.294321		0.731774	0.322852	-0.13844		0	Zinc-alpha-2-glycoprotein	0.0217454	0.196976	0.441959	0.414064	0.786756	0	0	-0.17523	0	1		P48774	Glutathione S-transferase Mu 5	0.53963	-0.686792	1.07656		1.01457	-0.423739	0.457962		0.780898	0.354903	-0.424378
F6Y3F4	Ribosyldihydronicotinamide dehydrogenase [quinone]	no	-0.192738	0.271541	-1.09957	-0.180969	-0.347975	0.209733	-0.779547	-0.697896	-0.151666	-0.197066	0.416342	-0.330824	0	Ribosyldihydronicotinamide dehydrogenase [quinone]	-0.300433	-0.403921	0.287466	0.224948	0.786844	0	0	0.103488	1	0		E9QK48	Echinoderm microtubule-associated protein-like 2	-0.0498302	0.443693	-0.550465	0.127274	-0.193915	0.349897	-0.615906	-0.29443	-0.102543	-0.165014	0.130404	-0.16592
Q99JX3	Golgi reassembly-stacking protein 2	no		-0.624431	0.120198	-0.565615		-0.445727	0.0310766	-0.407644		0.232665	-0.198915	0.196752	0	Golgi reassembly-stacking protein 2	-0.356616	-0.274098	0.239011	0.152983	0.788055	0	0	-0.0825181	0	1		Q3U1J4	DNA damage-binding protein 1		-0.452279	0.669299	-0.257373		-0.305562	0.194717	-0.00417777		0.264717	-0.484853	0.361656
Q9JMH6	Thioredoxin reductase 1, cytoplasmic	no	-0.00724205	0.657666	-0.388052	-0.0572528	-0.0317182	0.614023	-0.765006	-0.0146386	-0.0758135	-0.0350848	-0.418997	0.237381	0	Thioredoxin reductase 1, cytoplasmic	0.0512799	-0.0493349	0.219074	0.28192	0.788117	0	0	0.100615	1	0	Q61941	E9Q5J9		0.135666	0.829819	0.161049	0.250989	0.122341	0.754188	-0.601365	0.388828	-0.0266899	-0.00303283	-0.704935	0.402286
Q9Z2I8	Succinyl-CoA ligase [GDP-forming] subunit beta, mitochondrial	no	-0.484464	-1.6919	-0.984538	0.522782	-0.273758	-1.57125	0.548294	-2.21921	0.244835	0.270004	1.60694	-2.83267	0	Succinyl-CoA ligase [GDP-forming] subunit beta, mitochondrial	-0.659529	-0.87898	0.465467	0.624423	0.78833	0	0	0.219452	1	0	Q9D0M3	P12265	Beta-glucuronidase	-0.341555	-1.51974	-0.435437	0.831024	-0.119698	-1.43109	0.711935	-1.81574	0.293959	0.302056	1.321	-2.66777
P06745	Glucose-6-phosphate isomerase	no	0.284805	0.654388	-0.264587	-0.0475891	0.0883904	0.567195	0.0443768	0.191543	-0.18693	-0.0179824	0.388395	0.221796	0	Glucose-6-phosphate isomerase	0.156754	0.222876	0.200691	0.118844	0.788444	0	0	-0.0661222	0	1		Q61578	NADPH:adrenodoxin oxidoreductase, mitochondrial	0.427714	0.82654	0.284514	0.260653	0.24245	0.70736	0.208018	0.59501	-0.137806	0.0140695	0.102457	0.386701
Q8K4Z3	NAD(P)H-hydrate epimerase	no	-0.0451627	0.295022	-0.534889	-0.0703102	-0.132296	-0.0273153	-0.309182	-0.0943749	-0.11187	-0.0516317	0.204767	-0.145985	0	NAD(P)H-hydrate epimerase	-0.0888349	-0.140792	0.170431	0.0601796	0.788988	0	0	0.0519572	1	0		Q9CPT4	UPF0556 protein C19orf10 homolog	0.0977456	0.467174	0.0142124	0.237932	0.021764	0.112849	-0.145541	0.309091	-0.062746	-0.0195798	-0.0811711	0.018919
Q3UM45	Protein phosphatase 1 regulatory subunit 7	no	-0.287812	0.376265	-0.35716	-0.1688	-0.20189	0.363404	-0.102349	-0.252777	0.275226	-0.01413	0.354815	-0.179302	0	Protein phosphatase 1 regulatory subunit 7	-0.109376	-0.0484029	0.166487	0.140778	0.789381	0	0	-0.0609736	0	1		O35593	26S proteasome non-ATPase regulatory subunit 14	-0.144903	0.548417	0.191942	0.139442	-0.0478305	0.503568	0.0612924	0.150689	0.32435	0.017922	0.0688771	-0.0143976
P26883	Peptidyl-prolyl cis-trans isomerase FKBP1A	no	-0.199399	-1.3931	0.183298	-0.56477	-0.333542	-1.26297	-0.109835	-0.738606	-0.143203	-0.109443	-0.244864	-0.201001	0	Peptidyl-prolyl cis-trans isomerase FKBP1A	-0.493493	-0.611238	0.336516	0.253229	0.789884	0	0	0.117745	1	0		Q3ULJ0	Glycerol-3-phosphate dehydrogenase 1-like protein	-0.0564912	-1.22095	0.732399	-0.256528	-0.179482	-1.12281	0.0538064	-0.33514	-0.0940793	-0.0773911	-0.530802	-0.0360968
Q62165	Dystroglycan;Alpha-dystroglycan;Beta-dystroglycan	no	-0.181522	-1.37754	-0.248919	-0.428461	-0.377602	-1.38919	-0.0761781	-0.835464	-0.224559	0.0253636	0.0362529	-0.256168	0	Dystroglycan;Alpha-dystroglycan;Beta-dystroglycan	-0.559112	-0.669607	0.277743	0.286171	0.791028	0	0	0.110496	1	0		Q9QUI0	Transforming protein RhoA	-0.0386137	-1.20539	0.300182	-0.120219	-0.223542	-1.24902	0.0874628	-0.431997	-0.175436	0.0574155	-0.249685	-0.0912639
P48774	Glutathione S-transferase Mu 5	no	-0.181744	0.409777	-0.488224	0.265117	-0.0851825	0.49052	-0.187072	0.0679625	0.103514	0.0225881	0.314507	-0.180278	0	Glutathione S-transferase Mu 5	0.00123151	0.071557	0.206073	0.149164	0.792358	0	0	-0.0703255	0	1		Q8CBU2	Deoxyguanosine kinase, mitochondrial;Deoxycytidine kinase	-0.038836	0.581929	0.0608775	0.57336	0.0688771	0.630684	-0.0234311	0.471429	0.152638	0.0546401	0.0285691	-0.0153741
Q01853	Transitional endoplasmic reticulum ATPase	no	0.497805	0.636108	0.382431	1.04707	-0.08532	0.806696	0.491894	1.83243	-0.599251	0.175466	0.130629	0.677552	0	Transitional endoplasmic reticulum ATPase	0.640854	0.761424	0.144994	0.401945	0.792629	0	0	-0.12057	0	1		E9QN70	Laminin subunit beta-1	0.640714	0.80826	0.931532	1.35531	0.0687396	0.946861	0.655535	2.23589	-0.550127	0.207518	-0.155309	0.842456
Q76LV0	Glutathione peroxidase;Phospholipid hydroperoxide glutathione peroxidase, nuclear;Phospholipid hydroperoxide glutathione peroxidase, mitochondrial	no	0.263193	0.738648	0.946236	0.304748	0.186332	1.32761	0.380548	0.686354	0.103255	0.160773	-0.328532	0.264846	0	Glutathione peroxidase;Phospholipid hydroperoxide glutathione peroxidase, nuclear;Phospholipid hydroperoxide glutathione peroxidase, mitochondrial	0.563206	0.64521	0.166908	0.249662	0.795254	0	0	-0.0820041	0	1		Q9R0Q7	Prostaglandin E synthase 3	0.406101	0.9108	1.49534	0.61299	0.340391	1.46777	0.544189	1.08982	0.152378	0.192825	-0.61447	0.42975
P59325	Eukaryotic translation initiation factor 5	no	-0.138874	-1.37573	0.218723	-0.543724	-0.447365	-0.880099	0.227357	-0.291631	-0.186375	0.48608	-0.0445999	0.281034	0	Eukaryotic translation initiation factor 5	-0.459901	-0.347935	0.342704	0.228622	0.796192	0	0	-0.111967	0	1	Q80XN0	Q9JKR6	Hypoxia up-regulated protein 1	0.00403388	-1.20358	0.767824	-0.235482	-0.293306	-0.739934	0.390998	0.111835	-0.137251	0.518132	-0.330538	0.445939
Q62426	Cystatin-B	no	0.357588	-0.295156	0.309994	0.0658889	0.539349	-0.300439	-0.217794	0.154158	0.127072	0.14975	-0.563944	0.0681248	0	Cystatin-B	0.109579	0.0438187	0.149274	0.192501	0.796783	0	0	0.06576	1	0		Q8R001	Microtubule-associated protein RP/EB family member 2	0.500496	-0.123004	0.859095	0.374131	0.693409	-0.160275	-0.0541526	0.557624	0.176195	0.181802	-0.849882	0.233029
Q8CC36	Cerebral dopamine neurotrophic factor	no	-0.490601	-1.72517	-1.12364	-1.16088	-0.897049	-1.90188	-0.802704	-1.2794	-0.236404	-0.221913	0.596976	-0.234962	0	Cerebral dopamine neurotrophic factor	-1.12507	-1.22026	0.252315	0.249486	0.797489	0	0	0.0951851	1	0		P68372	Tubulin beta-4B chain;Tubulin beta-5 chain;Tubulin beta-4A chain;Tubulin beta-2A chain;Tubulin beta-2B chain	-0.347693	-1.55302	-0.574541	-0.852638	-0.742989	-1.76171	-0.639063	-0.875937	-0.18728	-0.189861	0.311038	-0.0700575
Q9CQM9	Glutaredoxin-3	no	-0.0245486	-0.946992	-0.00392364	-0.727026	0.262996	-1.04675	-0.0252196	-0.491336	0.240711	-0.11634	-0.184251	0.287059	0	Glutaredoxin-3	-0.425622	-0.325077	0.241757	0.286385	0.797717	0	0	-0.100546	0	1	P40124	P49813	Tropomodulin-1	0.11836	-0.77484	0.545178	-0.418784	0.417056	-0.906583	0.138421	-0.0878702	0.289834	-0.0842879	-0.470189	0.451963
Q02053	Ubiquitin-like modifier-activating enzyme 1	no	0.211544	0.563035	0.155859	0.199607	0.22423	0.502655	-0.0524759	0.297617	0.111151	-0.0733652	-0.317091	0.0831447	0	Ubiquitin-like modifier-activating enzyme 1	0.282511	0.243007	0.0942709	0.114769	0.79948	0	0	0.0395047	1	0	P70670	A3KGQ6	Actin-related protein 2/3 complex subunit 5;Actin-related protein 2/3 complex subunit 5-like protein	0.354452	0.735187	0.70496	0.507849	0.37829	0.64282	0.111165	0.701084	0.160275	-0.0413132	-0.603029	0.248049
P54071	Isocitrate dehydrogenase [NADP], mitochondrial	no	0.106476	1.03985	-0.921569	0.0922496	0.494774	0.696337	-0.167455	-0.211827	0.388743	-0.140742	0.735473	-0.318014	0	Isocitrate dehydrogenase [NADP], mitochondrial	0.0792509	0.202957	0.400551	0.230548	0.800093	0	0	-0.123706	0	1		E9Q3X0	Major vault protein	0.249385	1.212	-0.372468	0.400492	0.648833	0.836501	-0.00381376	0.19164	0.437867	-0.10869	0.449535	-0.15311
Q8VDC3	Cytoplasmic aconitate hydratase	no	-0.0668965	0.517089	-0.256437	0.782377	0.223564	0.464137	-0.04701	0.639347	0.190275	-0.237715	0.227059	-0.108876	0	Cytoplasmic aconitate hydratase	0.244033	0.320009	0.243502	0.149096	0.800847	0	0	-0.0759763	0	1		E9Q9F5	Septin-7	0.0760118	0.689241	0.292664	1.09062	0.377624	0.604301	0.116631	1.04281	0.239398	-0.205663	-0.0588787	0.0560286
Q8BWT1	3-ketoacyl-CoA thiolase, mitochondrial	no	0.08434	0.626164	-1.29698	-0.561989	0.132112	-0.566483	-0.0402395	-1.20504	-0.0212618	-1.1115	1.21163	-0.847068	0	3-ketoacyl-CoA thiolase, mitochondrial	-0.287115	-0.419912	0.415074	0.300941	0.805087	0	0	0.132797	1	0	Q9CPQ1	Q91VK1	Basic leucine zipper and W2 domain-containing protein 2	0.227248	0.798316	-0.747875	-0.253747	0.286172	-0.426318	0.123401	-0.801573	0.0278618	-1.07945	0.925696	-0.682164
Q9Z1A1	0	no	-0.264348	-0.940993	-0.274452	-0.902409	0.144716	-1.31329	0.41467	-1.12794	0.395649	0.17659	0.725082	-0.119881	0	0	-0.59555	-0.470462	0.188479	0.43823	0.805884	0	0	-0.125088	0	1		E9Q5D9	Insulin-like growth factor-binding protein 7	-0.12144	-0.768841	0.274649	-0.594166	0.298776	-1.17313	0.578311	-0.724476	0.444773	0.208642	0.439144	0.0450235
P47811	Mitogen-activated protein kinase 14	no	0.0582237	0.932297	-0.646788		0.109095	0.828186	-0.161767		-0.139896	-0.193382	0.292559		0	Mitogen-activated protein kinase 14	0.114577	0.258505	0.456713	0.295378	0.80645	0	0	-0.143927	0	1		Q80W21	Glutathione S-transferase Mu 7	0.201132	1.10445	-0.0976871		0.263155	0.968351	0.00187425		-0.0907722	-0.16133	0.00662125
Q792Z0	0	no	-1.33312		-1.86147	1.65433	-1.88311		-1.7894	0.998093	-0.681037		0.17095	-0.62127	0	0	-0.513416	-0.891472	1.09455	0.94517	0.806938	0	0	0.378056	1	0		Q9CWJ9	Bifunctional purine biosynthesis protein PURH;Phosphoribosylaminoimidazolecarboxamide formyltransferase;IMP cyclohydrolase	-1.19021		-1.31237	1.96258	-1.72905		-1.62576	1.40156	-0.631913		-0.114988	-0.456365
E9PX89	BolA-like protein 3	no	-0.589253	-1.76651	-0.632701	-1.52112	-0.279507	-1.83936	0.00024425	-1.79946	0.128603	0.12719	0.797204	-0.237433	0	BolA-like protein 3	-1.1274	-0.979521	0.302463	0.488329	0.807087	0	0	-0.147876	0	1		P17563	Selenium-binding protein 1;Selenium-binding protein 2	-0.446345	-1.59436	-0.0835998	-1.21288	-0.125447	-1.6992	0.163885	-1.396	0.177727	0.159242	0.511266	-0.0725283
P05125	Natriuretic peptides A;Atrial natriuretic factor;Auriculin-B;Auriculin-A;Atriopeptin-1;Atriopeptin-2;Natriuretic peptide	no	0.982941	1.17892	4.5739	0.68643	1.45792	1.34301	1.49669	2.13992	0.592052	-0.0715847	-2.78309	1.34195	0	Natriuretic peptides A;Atrial natriuretic factor;Auriculin-B;Auriculin-A;Atriopeptin-1;Atriopeptin-2;Natriuretic peptide	1.85555	1.60938	0.911755	0.179829	0.807098	0	0	0.246164	1	0		Q8C605	6-phosphofructokinase;6-phosphofructokinase type C	1.12585	1.35107	5.123	0.994672	1.61197	1.48318	1.66033	2.54338	0.641176	-0.0395328	-3.06903	1.50686
Q60864	Stress-induced-phosphoprotein 1	no	0.0396569	-1.79405	0.0139592	-1.07928	-0.299075	-1.26991	0.185838	-0.876162	-0.368691	0.40283	0.18403	0.128348	0	Stress-induced-phosphoprotein 1	-0.704929	-0.564827	0.446984	0.319921	0.808182	0	0	-0.140102	0	1		P23591	GDP-L-fucose synthase	0.182565	-1.6219	0.56306	-0.77104	-0.145015	-1.12974	0.349479	-0.472696	-0.319568	0.434882	-0.101908	0.293253
P61222	ATP-binding cassette sub-family E member 1	no	0.441092	0.963656	-0.352117	0.960401	0.610541	0.964037	-0.0316563	0.858173	-0.0178695	-0.00986176	0.230991	0.0301912	0	ATP-binding cassette sub-family E member 1	0.503258	0.600274	0.31044	0.223285	0.809024	0	0	-0.0970155	0	1		P49443	Protein phosphatase 1A	0.584	1.13581	0.196985	1.26864	0.764601	1.1042	0.131985	1.26164	0.0312541	0.0221902	-0.0549468	0.195096
Q5SPV7	Acylphosphatase;Acylphosphatase-2	no	-0.334202	-1.90902	-0.905873	-1.45607	-0.399822	-1.851	-0.119177	-1.67232	-0.0615262	0.0632649	0.834769	-0.296233	0	Acylphosphatase;Acylphosphatase-2	-1.15129	-1.01058	0.340943	0.438922	0.809084	0	0	-0.140711	0	1		Q7TQI3	Ubiquitin thioesterase OTUB1	-0.191294	-1.73687	-0.356772	-1.14783	-0.245762	-1.71083	0.044464	-1.26885	-0.0124026	0.0953169	0.548831	-0.131329
P06151	L-lactate dehydrogenase A chain;L-lactate dehydrogenase	no	-0.0250802	0.732774	-0.204386	-0.0570296	0.0338347	0.592647	0.0215913	0.0532359	0.0183774	-0.0347523	0.208288	-0.0639267	0	L-lactate dehydrogenase A chain;L-lactate dehydrogenase	0.11157	0.175327	0.210717	0.139259	0.810384	0	0	-0.0637578	0	1		Q9JII6	Alcohol dehydrogenase [NADP(+)]	0.117828	0.904926	0.344715	0.251213	0.187894	0.732812	0.185232	0.456702	0.067501	-0.00270033	-0.0776499	0.100978
P70695	Fructose-1,6-bisphosphatase isozyme 2	no	-0.562936	-0.657476	-2.4596	-1.09216	-0.320838	-0.921566	-1.72479	-2.43377	0.238585	-0.217838	0.69964	-1.25469	0	Fructose-1,6-bisphosphatase isozyme 2	-1.19304	-1.35024	0.437628	0.461677	0.813081	0	0	0.157198	1	0		Q8BGQ7	Alanine--tRNA ligase, cytoplasmic	-0.420028	-0.485324	-1.9105	-0.783918	-0.166778	-0.781402	-1.56115	-2.0303	0.287709	-0.185786	0.413702	-1.08979
Q64514	Tripeptidyl-peptidase 2	no	-0.0229546	1.01526	-0.0409768	0.206022	0.35173	0.803169	0.169668	0.1244	0.379448	-0.069925	0.0647857	0.0571583	0	Tripeptidyl-peptidase 2	0.289337	0.362242	0.248418	0.154968	0.813215	0	0	-0.0729042	0	1		Q9CQN1	Heat shock protein 75 kDa, mitochondrial	0.119954	1.18741	0.508124	0.514264	0.505789	0.943333	0.333309	0.527866	0.428571	-0.037873	-0.221152	0.222063
Q9D3D9	ATP synthase subunit delta, mitochondrial	no	-0.530811	-2.05944	-0.833296	-1.60361	-1.19468	-1.81458	-0.737774	-1.70593	-0.57905	0.211983	0.211436	-0.0942402	0	ATP synthase subunit delta, mitochondrial	-1.25679	-1.36324	0.350111	0.248456	0.813309	0	0	0.10645	1	0		E9PV24		-0.387902	-1.88729	-0.284194	-1.29537	-1.04062	-1.67441	-0.574133	-1.30246	-0.529926	0.244034	-0.0745018	0.0706641
Q9CZ42	ATP-dependent (S)-NAD(P)H-hydrate dehydratase	no	-0.265761	0.352763	-0.657853	0.44349	-0.499514	0.107635	-0.242022	0.20191	-0.324316	-0.191415	0.485061	-0.0497379	0	ATP-dependent (S)-NAD(P)H-hydrate dehydratase	-0.0318402	-0.107998	0.261481	0.161706	0.814204	0	0	0.0761575	1	0		P70195	Proteasome subunit beta type-7	-0.122853	0.524915	-0.108752	0.751732	-0.345454	0.2478	-0.0783809	0.605376	-0.275193	-0.159363	0.199123	0.115166
Q80Y14	Glutaredoxin-related protein 5, mitochondrial	no	-0.113067	-1.40812	-0.312272	-0.774687	0.0809322	-1.34581	0.0438772	-0.939022	0.232782	-0.300278	0.244833	-0.0396499	0	Glutaredoxin-related protein 5, mitochondrial	-0.652037	-0.540005	0.287611	0.357656	0.815646	0	0	-0.112032	0	1		P57759	Endoplasmic reticulum resident protein 29	0.0298416	-1.23597	0.236829	-0.466444	0.234992	-1.20564	0.207518	-0.535555	0.281906	-0.268226	-0.0411054	0.125254
P14602	Heat shock protein beta-1	no	-1.288	0.0258946	0.359481	0.991673	-0.150457	-0.111563	0.4108	0.447014	1.16891	-0.222028	0.000759318	-0.534275	0	Heat shock protein beta-1	0.0222614	0.148948	0.480476	0.161998	0.816044	0	0	-0.126687	0	1		Q9DBG5	Perilipin-3	-1.14509	0.198047	0.908582	1.29991	0.00360232	0.0286018	0.574441	0.85048	1.21804	-0.189976	-0.285179	-0.369371
P63101	14-3-3 protein zeta/delta	no	0.892716	-0.873834	0.441708	-0.708124	-0.00662273	-0.671833	0.183458	-0.217319	-0.901843	0.144143	-0.246386	0.48586	0	14-3-3 protein zeta/delta	-0.0618835	-0.178079	0.432219	0.183811	0.816638	0	0	0.116196	1	0		P17182	Alpha-enolase;Enolase	1.03562	-0.701682	0.99081	-0.399882	0.147437	-0.531668	0.347099	0.186147	-0.852719	0.176195	-0.532324	0.650765
F8WJ05	Inter-alpha-trypsin inhibitor heavy chain H1	no	0.385063		1.22776	0.603453	0.523742		0.866271	1.04784	-0.217295		-0.242823	0.583042	0	Inter-alpha-trypsin inhibitor heavy chain H1	0.738759	0.812618	0.252498	0.153654	0.817428	0	0	-0.0738589	0	1		Q8CAK1	Putative transferase CAF17 homolog, mitochondrial	0.527971		1.77686	0.911695	0.677801		1.02991	1.45131	-0.168171		-0.528761	0.747946
P09671	Superoxide dismutase [Mn], mitochondrial	no	-0.0126364	-0.0836059	-1.22951	-0.962678	-0.442406	-0.520451	-0.300575	-1.40462	-0.360469	-0.315632	0.760711	-0.439259	0	Superoxide dismutase [Mn], mitochondrial	-0.572107	-0.667013	0.307728	0.250045	0.81912	0	0	0.0949063	1	0		Q9R111	Guanine deaminase	0.130272	0.0885462	-0.680405	-0.654435	-0.288347	-0.380286	-0.136934	-1.00115	-0.311345	-0.28358	0.474774	-0.274355
P99026	Proteasome subunit beta type-4	no		0.971986	0.41563	0.62467		0.971936	0.459196	0.740895		-0.0767242	-0.0136934	0.203249	0	Proteasome subunit beta type-4	0.670762	0.724009	0.162251	0.148256	0.820579	0	0	-0.0532467	0	1		P42932	T-complex protein 1 subunit theta		1.14414	0.964731	0.932912		1.1121	0.622837	1.14436		-0.0446723	-0.299631	0.368154
Q9JII6	Alcohol dehydrogenase [NADP(+)]	no	0.584272	0.783972	0.567064	0.933199	0.368599	0.873432	0.197678	1.19224	-0.300439	0.0925409	-0.373557	0.0883589	0	Alcohol dehydrogenase [NADP(+)]	0.717126	0.657987	0.0872376	0.228669	0.821368	0	0	0.0591391	1	0		P12787	Cytochrome c oxidase subunit 5A, mitochondrial	0.72718	0.956124	1.11617	1.24144	0.522658	1.0136	0.361319	1.59571	-0.251316	0.124593	-0.659495	0.253263
Q9DCM0	Protein ETHE1, mitochondrial	no	-0.145262	-0.158556	-0.849319	-0.491443	-0.256556	-0.3423	-0.380159	-0.870119	-0.140649	-0.0879581	0.418975	-0.159576	0	Protein ETHE1, mitochondrial	-0.411145	-0.462284	0.166568	0.138382	0.821426	0	0	0.0511389	1	0		O88492	Perilipin-4	-0.00235352	0.0135963	-0.300217	-0.183201	-0.102496	-0.202136	-0.216518	-0.466653	-0.0915252	-0.0559062	0.133037	0.00532815
P26350	Prothymosin alpha;Thymosin alpha	no	1.16574	-0.192494	0.666081	0.599307	0.782983	0.394582	0.326416	1.04595	-0.386171	0.770927	-0.180558	0.480705	0	Prothymosin alpha;Thymosin alpha	0.559659	0.637482	0.280768	0.169258	0.821917	0	0	-0.0778229	0	1		P54822	Adenylosuccinate lyase	1.30865	-0.0203421	1.21518	0.907549	0.937043	0.534746	0.490057	1.44941	-0.337047	0.802979	-0.466496	0.645609
P83940	Transcription elongation factor B polypeptide 1	no	-0.297446	-0.821446	-0.109638		-0.163018	-0.947519	0.16772		0.166244	-0.113711	0.214971		0	Transcription elongation factor B polypeptide 1	-0.40951	-0.314272	0.212984	0.330705	0.822515	0	0	-0.0952377	0	1		Q924M7	Mannose-6-phosphate isomerase	-0.154538	-0.649293	0.439464		-0.00895804	-0.807355	0.331361		0.215368	-0.0816595	-0.0709665
A8DUK4	0	no	0.556732	-0.666824	0.209458	0.421504	0.152319	7.27793e-05	-0.239495	0.32334	-0.388542	0.852429	-0.454904	-0.0812484	0	0	0.130218	0.0590592	0.275124	0.119428	0.823868	0	0	0.0711584	1	0		P63328	Serine/threonine-protein phosphatase 2B catalytic subunit alpha isoform	0.69964	-0.494672	0.758559	0.729746	0.306379	0.140237	-0.0758545	0.726806	-0.339418	0.884481	-0.740842	0.0836559
Q9CT10	Ran-binding protein 3	no		-1.44984	0.0260175	-0.67203		-1.17036	0.00153135	-0.53795		0.471297	-0.0711296	0.239018	0	Ran-binding protein 3	-0.698617	-0.568926	0.42625	0.33865	0.823979	0	0	-0.129691	0	1		O70251	Elongation factor 1-beta		-1.27769	0.575119	-0.363788		-1.03019	0.165172	-0.134484		0.503349	-0.357067	0.403922
O88544	COP9 signalosome complex subunit 4	no	-0.322521	-1.3544	0.666764	-0.74579	-0.121959	-0.943805	0.167835	-0.407069	0.304087	0.336996	-0.250042	0.471732	0	COP9 signalosome complex subunit 4	-0.438986	-0.326249	0.425084	0.236953	0.826552	0	0	-0.112737	0	1		Q9CY75	Glycine cleavage system H protein, mitochondrial	-0.179613	-1.18225	1.21586	-0.437547	0.0321009	-0.80364	0.331476	-0.00360232	0.35321	0.369048	-0.53598	0.636636
Q9D172	ES1 protein homolog, mitochondrial	no	0.240478	-0.95607	-0.598006	-0.331285	-0.428083	-1.35205	0.725365	-1.07793	-0.639955	-0.41609	1.43604	-0.707405	0	ES1 protein homolog, mitochondrial	-0.411221	-0.533173	0.252133	0.462085	0.826656	0	0	0.121953	1	0		P97450	ATP synthase-coupling factor 6, mitochondrial	0.383386	-0.783918	-0.0489047	-0.0230425	-0.274023	-1.21188	0.889006	-0.674461	-0.590832	-0.384038	1.1501	-0.5425
Q9D113	DNL-type zinc finger protein	no	-0.206544	-0.844532	-0.337591		-0.797555	-0.622806	-0.158888		-0.243187	0.248786	0.296288		0	DNL-type zinc finger protein	-0.462889	-0.526416	0.194535	0.190562	0.826998	0	0	0.0635276	1	0		P09542	Myosin light chain 3	-0.0636353	-0.67238	0.211511		-0.643495	-0.482642	0.00475299		-0.194064	0.280838	0.0103502
Q9Z1N5	Spliceosome RNA helicase Ddx39b;ATP-dependent RNA helicase DDX39A	no	0.244675	0.483565	0.343329	-0.178603	-0.088763	0.578998	-0.512564	0.628864	-0.337999	0.0423164	-0.887381	0.405462	0	Spliceosome RNA helicase Ddx39b;ATP-dependent RNA helicase DDX39A	0.223241	0.151634	0.142632	0.275278	0.827464	0	0	0.0716076	1	0		P07310	Creatine kinase M-type	0.387583	0.655717	0.89243	0.129639	0.0652966	0.719162	-0.348923	1.03233	-0.288875	0.0743684	-1.17332	0.570366
P56380	Bis(5-nucleosyl)-tetraphosphatase [asymmetrical]	no	-0.158807	-0.284519	-0.763676	-0.327019	-0.22759	-0.556139	-0.257951	-0.646038	-0.154861	-0.221124	0.398438	-0.330403	0	Bis(5-nucleosyl)-tetraphosphatase [asymmetrical]	-0.383505	-0.42193	0.131659	0.105235	0.827594	0	0	0.0384243	1	0		Q9CZ30	Obg-like ATPase 1	-0.0158992	-0.112366	-0.214575	-0.0187766	-0.0735299	-0.415975	-0.0943102	-0.242572	-0.105737	-0.189072	0.1125	-0.165499
Q91ZJ5	UTP--glucose-1-phosphate uridylyltransferase	no	0.164054	1.06946	0.223291	0.589248	0.319364	1.03423	0.104674	0.323818	0.156769	-0.015413	-0.111339	-0.316314	0	UTP--glucose-1-phosphate uridylyltransferase	0.511513	0.445521	0.208396	0.202789	0.828003	0	0	0.0659923	1	0		F8WGX5	DmX-like protein 1	0.306962	1.24161	0.772392	0.89749	0.473423	1.17439	0.268315	0.727284	0.205893	0.016639	-0.397277	-0.15141
Q9CPU0	Lactoylglutathione lyase	no	-0.182204	-0.911482	-0.224176	-1.14731	-0.970783	-0.705469	0.0322107	-0.527927	-0.806869	0.0332447	0.218906	0.596296	0	Lactoylglutathione lyase	-0.616294	-0.542992	0.243466	0.212228	0.82813	0	0	-0.073302	0	1		P50462	Cysteine and glycine-rich protein 3	-0.0392956	-0.73933	0.324926	-0.839073	-0.816723	-0.565305	0.195852	-0.124461	-0.757745	0.0652966	-0.0670318	0.7612
P26040	Ezrin	no	0.0983218	-0.434585	-0.472816	-0.472127	-0.101644	-0.435417	-0.130271	-0.459217	-0.202361	-0.117518	0.310541	-0.026483	0	Ezrin	-0.320302	-0.281637	0.139827	0.0959567	0.828169	0	0	-0.0386644	0	1		F8WGT0	Talin-1	0.24123	-0.262433	0.0762854	-0.163885	0.0524158	-0.295253	0.0333701	-0.0557509	-0.153238	-0.0854661	0.0246034	0.138421
P07309	Transthyretin	no	-0.707344	-0.280911	0.203048	0.474527	-0.460276	-0.14103	-0.161334	0.182571	0.206438	0.396412	-0.46628	-0.436069	0	Transthyretin	-0.0776698	-0.145017	0.261649	0.131334	0.828316	0	0	0.0673474	1	0		P61087	Ubiquitin-conjugating enzyme E2 K	-0.564435	-0.108759	0.752149	0.782769	-0.306217	-0.000865329	0.00230651	0.586038	0.255561	0.428464	-0.752218	-0.271165
Q6R0H7	Guanine nucleotide-binding protein G(s) subunit alpha isoforms XLas;Guanine nucleotide-binding protein G(s) subunit alpha isoforms short	no	-0.00356975	1.3672		0.859719	0.0431767	0.80806		1.02735	-0.0786233	-0.244185		0.206264	0	Guanine nucleotide-binding protein G(s) subunit alpha isoforms XLas;Guanine nucleotide-binding protein G(s) subunit alpha isoforms short	0.741116	0.626197	0.400126	0.298305	0.830058	0	0	0.11492	1	0		P19324	Serpin H1	0.139339	1.53935		1.16796	0.197236	0.948224		1.43082	-0.0294997	-0.212133		0.371169
Q99LB2	Dehydrogenase/reductase SDR family member 4	no	-0.536333	0.676665	-2.13114	-0.393667	-1.00127	0.160497	-0.713029	-0.257462	-0.457712	-0.508008	1.57021	-0.00863707	0	Dehydrogenase/reductase SDR family member 4	-0.596118	-0.452815	0.578851	0.255412	0.831597	0	0	-0.143304	0	1		P80316	T-complex protein 1 subunit epsilon	-0.393425	0.848817	-1.58204	-0.0854246	-0.847207	0.300662	-0.549388	0.146004	-0.408589	-0.475956	1.28428	0.156267
Q6P1B1	Xaa-Pro aminopeptidase 1	no	-0.0147469	0.486955	-0.294991	-0.138741	0.354775	0.374697	-0.27188	-0.204807	0.252347	-0.13382	0.0757757	-0.138883	0	Xaa-Pro aminopeptidase 1	0.0096191	0.0631963	0.169126	0.174679	0.832907	0	0	-0.0535772	0	1		Q99NF7	Protein phosphatase 1B	0.128161	0.659107	0.25411	0.169501	0.508834	0.514862	-0.108239	0.198659	0.30147	-0.101768	-0.210162	0.026021
Q9JI46	Diphosphoinositol polyphosphate phosphohydrolase 1	no	-0.363254	-0.220249	-0.243306	-0.998078	-0.341274	-0.775872	0.00153135	-0.959086	0.0327615	-0.346677	1.2089	-0.102644	0	Diphosphoinositol polyphosphate phosphohydrolase 1	-0.456222	-0.518675	0.183318	0.216448	0.833222	0	0	0.0624537	1	0		Q564G0	Guanylate kinase	-0.220345	-0.0480967	0.305795	-0.689836	-0.187214	-0.635708	0.165172	-0.55562	0.081885	-0.314625	0.922959	0.06226
P62196	26S protease regulatory subunit 8	no	-0.456905	1.05024		1.83157	0.963236	0.997135		0.941109	1.41602	-0.0380371		-0.769732	0	26S protease regulatory subunit 8	0.808302	0.96716	0.671609	0.0162918	0.835061	0	0	-0.158858	0	1		Q91ZX7	Prolow-density lipoprotein receptor-related protein 1;Low-density lipoprotein receptor-related protein 1 85 kDa subunit;Low-density lipoprotein receptor-related protein 1 515 kDa subunit;Low-density lipoprotein receptor-related protein 1 intracellular domain	-0.313997	1.2224		2.13981	1.1173	1.1373		1.34458	1.46514	-0.00598518		-0.604827
P26443	Glutamate dehydrogenase 1, mitochondrial	no	-0.332391	0.902517	0.672714	1.51579	0.00414817	0.86907	0.404975	1.08314	0.249769	-0.237516	-0.19728	-0.403755	0	Glutamate dehydrogenase 1, mitochondrial	0.689658	0.590334	0.384348	0.241269	0.835327	0	0	0.099324	1	0		Q99J39	Malonyl-CoA decarboxylase, mitochondrial	-0.189483	1.07467	1.22182	1.82404	0.158208	1.00923	0.568616	1.48661	0.298893	-0.205464	-0.483218	-0.238851
Q91XH5	Sepiapterin reductase	no	-0.303158	0.380131	-0.58939	0.226609	-0.350882	0.252844	-0.340055	-0.0815201	-0.0119522	-0.0734097	0.397771	-0.277722	0	Sepiapterin reductase	-0.0714522	-0.129903	0.226332	0.14196	0.835399	0	0	0.058451	1	0		E9Q0S6		-0.16025	0.552283	-0.0402892	0.534851	-0.196823	0.393008	-0.176414	0.321946	0.0371714	-0.0413577	0.111833	-0.112818
E9PXE5	Dystonin	no	-0.593131	0.314377	-1.05664	0.240322	-1.43481	0.292173	-0.310763	-0.0745603	-0.81472	0.174966	-0.101606	0.12032	0	Dystonin	-0.273768	-0.381991	0.332301	0.372214	0.835567	0	0	0.108223	1	0		P97823	Acyl-protein thioesterase 1	-0.450222	0.48653	-0.507542	0.548565	-1.28076	0.432338	-0.147122	0.328906	-0.765597	0.207018	-0.387544	0.285225
Q71RI9	Kynurenine--oxoglutarate transaminase 3	no	0.411435	1.04068	-0.88841	0.2981	0.493025	0.429529	0.272841	0.0379331	-0.0331978	-0.385852	1.02406	-0.214959	0	Kynurenine--oxoglutarate transaminase 3	0.215452	0.308332	0.402571	0.101314	0.83582	0	0	-0.0928798	0	1	Q9CPU5	B1AX58	Plastin-3	0.554343	1.21284	-0.339309	0.606342	0.647084	0.569693	0.436482	0.441399	0.0159258	-0.353801	0.738119	-0.0500543
P34914	Epoxide hydrolase 2	no	-0.243485	0.707257	-0.867589	0.0997147	0.201521	0.43993	-0.0931143	-0.513829	0.561482	-0.246376	0.645572	-0.626148	0	Epoxide hydrolase 2	-0.0760256	0.00862674	0.329018	0.205455	0.835823	0	0	-0.0846524	0	1		P10107	Annexin A1;Annexin	-0.100577	0.879409	-0.318488	0.407957	0.35558	0.580094	0.0705267	-0.110363	0.610606	-0.214324	0.359634	-0.461243
Q9R1P3	Proteasome subunit beta type-2	no	0.227256	1.06245	0.041429	0.535128	0.230985	0.904017	-0.0881768	0.553945	0.126944	0.0310368	-0.176895	0.0838734	0	Proteasome subunit beta type-2	0.466566	0.400192	0.223194	0.213036	0.836817	0	0	0.066373	1	0		E9QAQ5	Glycogen synthase kinase-3 beta	0.370164	1.2346	0.59053	0.84337	0.385044	1.04418	0.0754641	0.957412	0.176067	0.0630887	-0.462833	0.248778
E9Q5L3	Short/branched chain specific acyl-CoA dehydrogenase, mitochondrial	no	0.032776	0.0640795	-0.572283		-0.496749	-0.0248952	0.24148		-0.507668	-0.428208	0.915971		0	Short/branched chain specific acyl-CoA dehydrogenase, mitochondrial	-0.158476	-0.093388	0.207101	0.215843	0.838414	0	0	-0.0650878	0	1		E9QPX3	NADH dehydrogenase [ubiquinone] iron-sulfur protein 4, mitochondrial	0.175684	0.236232	-0.0231818		-0.342689	0.115269	0.405121		-0.458545	-0.396157	0.630033
P20029	78 kDa glucose-regulated protein	no	0.161252	-0.707906	0.749029	-0.41325	0.0564539	-0.692148	0.404391	-0.321104	-0.0825012	0.0741625	-0.307634	0.106163	0	78 kDa glucose-regulated protein	-0.0527188	-0.138102	0.322469	0.23675	0.83867	0	0	0.085383	1	0		Q8BMF3	NADP-dependent malic enzyme, mitochondrial	0.304161	-0.535754	1.29813	-0.105008	0.210513	-0.551983	0.568032	0.0823621	-0.0333776	0.106214	-0.593572	0.271067
Q921H8	3-ketoacyl-CoA thiolase A, peroxisomal;3-ketoacyl-CoA thiolase B, peroxisomal	no	-0.409294	-0.163818	-0.624864		-0.255766	-0.401394	-0.656227		0.0283929	-0.167067	-0.030698		0	3-ketoacyl-CoA thiolase A, peroxisomal;3-ketoacyl-CoA thiolase B, peroxisomal	-0.399325	-0.437796	0.133186	0.117027	0.839006	0	0	0.0384704	1	0		Q9D7J9	Enoyl-CoA hydratase domain-containing protein 3, mitochondrial	-0.266385	0.00833397	-0.0757632		-0.101707	-0.26123	-0.492586		0.0775164	-0.135016	-0.316636
Q8QZV3	Enoyl-CoA delta isomerase 1, mitochondrial	no	-0.0293411	0.677002	-1.03414	-0.258979	-0.323431	0.326651	-0.509994	-0.484942	-0.347282	-0.33604	0.358112	-0.275945	0	Enoyl-CoA delta isomerase 1, mitochondrial	-0.161363	-0.247929	0.352556	0.195937	0.839077	0	0	0.0865656	1	0		P51150	Ras-related protein Rab-7a	0.113567	0.849155	-0.485034	0.0492628	-0.169372	0.466815	-0.346353	-0.081476	-0.298158	-0.303988	0.0721745	-0.111041
Q9JHI5	Isovaleryl-CoA dehydrogenase, mitochondrial	no	-0.117454	0.154871	-1.02608	-0.451244	-0.264321	-0.203943	-0.315965	-0.913517	-0.220508	-0.334598	0.720179	-0.482439	0	Isovaleryl-CoA dehydrogenase, mitochondrial	-0.359977	-0.424437	0.254282	0.164626	0.839673	0	0	0.0644594	1	0		Q9DC61	Mitochondrial-processing peptidase subunit alpha	0.0254541	0.327023	-0.47698	-0.143002	-0.110262	-0.063779	-0.152324	-0.51005	-0.171385	-0.302546	0.434241	-0.317535
Q9DBG5	Perilipin-3	no	-0.24299	-0.901422	-0.134749	-0.835413	-0.416356	-0.5583	-0.295033	-1.06339	-0.197716	0.17309	-0.166099	-0.12128	0	Perilipin-3	-0.528643	-0.58327	0.197868	0.168839	0.840776	0	0	0.0546265	1	0		P00405	Cytochrome c oxidase subunit 2	-0.100082	-0.72927	0.414352	-0.52717	-0.262296	-0.418136	-0.131392	-0.659925	-0.148593	0.205142	-0.452037	0.0436244
P17751	Triosephosphate isomerase	no	-0.228956	-0.584121	-0.614185	-0.830398	-0.335144	-0.647985	-0.0883138	-0.990447	-0.124917	-0.035345	0.472692	-0.110125	0	Triosephosphate isomerase	-0.564415	-0.515472	0.124548	0.195393	0.840908	0	0	-0.0489427	0	1		Q76MZ3	Serine/threonine-protein phosphatase 2A 65 kDa regulatory subunit A alpha isoform	-0.0860479	-0.411969	-0.0650835	-0.522156	-0.181084	-0.50782	0.0753272	-0.586981	-0.0757937	-0.0032931	0.186754	0.054779
P09542	Myosin light chain 3	no	-0.186629	-1.71466	-0.0693532	-0.87715	-0.0969213	-1.39959	0.199474	-1.10328	0.0868051	0.438771	0.26687	-0.186255	0	Myosin light chain 3	-0.711947	-0.60008	0.378771	0.385668	0.842898	0	0	-0.111868	0	1		P26443	Glutamate dehydrogenase 1, mitochondrial	-0.0437203	-1.54251	0.479748	-0.568908	0.0571383	-1.25942	0.363115	-0.699818	0.135929	0.470823	-0.0190681	-0.0213504
Q9Z2U1	Proteasome subunit alpha type-5;Proteasome subunit alpha type	no	0.0866796	-0.341564	0.389674	-0.686421	-0.0998362	-0.249458	0.0819765	-0.507937	-0.151202	0.206001	-0.12712	0.0740048	0	Proteasome subunit alpha type-5;Proteasome subunit alpha type	-0.137908	-0.193814	0.236489	0.12472	0.843405	0	0	0.0559059	1	0		P62858	40S ribosomal protein S28	0.229588	-0.169412	0.938775	-0.378179	0.0542234	-0.109294	0.245617	-0.104471	-0.102078	0.238053	-0.413058	0.238909
Q99LD8	N(G),N(G)-dimethylarginine dimethylaminohydrolase 2	no	0.584533	0.225524	1.04277	0.281829	0.448682	0.565218	0.589792	0.368349	-0.0638272	0.344572	-0.501879	0.0650526	0	N(G),N(G)-dimethylarginine dimethylaminohydrolase 2	0.533664	0.49301	0.187116	0.0517092	0.845876	0	0	0.0406537	1	0		P21614	Vitamin D-binding protein	0.727441	0.397676	1.59187	0.590071	0.602742	0.705382	0.753433	0.771815	-0.0147036	0.376624	-0.787817	0.229957
Q9CQI3	Glia maturation factor beta	no	0.277278	-0.346814	0.515092	-0.17734	0.189405	-0.0642035	0.180165	-0.219435	-0.00675931	0.127061	-0.330499	0.000911128	0	Glia maturation factor beta	0.0670539	0.0214828	0.199154	0.0994826	0.84691	0	0	0.0455711	1	0		Q3UGR5	Haloacid dehalogenase-like hydrolase domain-containing protein 2	0.420186	-0.174662	1.06419	0.130903	0.343465	0.0759609	0.343806	0.184031	0.0423642	0.159112	-0.616437	0.165815
Q9WVA4	Transgelin-2	no	0.993349	0.31796	1.84016	0.257346	0.602708	0.685404	1.01096	0.794796	-0.407707	0.375573	-0.856224	0.459524	0	Transgelin-2	0.852204	0.773466	0.36915	0.088398	0.847678	0	0	0.0787383	1	0		P11499	Heat shock protein HSP 90-beta	1.13626	0.490112	2.38926	0.565588	0.756767	0.825568	1.1746	1.19826	-0.358583	0.407625	-1.14216	0.624429
Q8R1H0	Homeodomain-only protein	no	-0.437594	-1.42324	-0.880002	-2.10629	-0.621633	-2.17944	-0.122118	-2.46524	-0.155917	-0.644447	0.59255	-0.684536	0	Homeodomain-only protein	-1.21178	-1.34711	0.359897	0.575175	0.84971	0	0	0.135328	1	0		P30416	Peptidyl-prolyl cis-trans isomerase FKBP4;Peptidyl-prolyl cis-trans isomerase FKBP4, N-terminally processed;Peptidyl-prolyl cis-trans isomerase	-0.294686	-1.25108	-0.330901	-1.79805	-0.467573	-2.03928	0.0415233	-2.06178	-0.106793	-0.612395	0.306612	-0.519631
Q9D7X8	Gamma-glutamylcyclotransferase	no	-0.100404	-0.283183	-1.06225	-1.26623	-0.393626	-0.653453	-0.475326	-1.48739	-0.245566	-0.162654	0.533258	-0.347281	0	Gamma-glutamylcyclotransferase	-0.678018	-0.75245	0.286235	0.250914	0.851529	0	0	0.0744319	1	0		P58771	Tropomyosin alpha-1 chain	0.0425042	-0.111031	-0.513152	-0.957989	-0.239566	-0.513289	-0.311685	-1.08393	-0.196442	-0.130602	0.24732	-0.182377
P14152	Malate dehydrogenase, cytoplasmic	no	-0.386329	-0.353191	-0.980797	-0.741415	-0.43713	-0.426572	-0.296994	-1.11558	-0.0407801	-0.0922988	0.71	-0.388986	0	Malate dehydrogenase, cytoplasmic	-0.615433	-0.569069	0.150173	0.184935	0.852374	0	0	-0.0463644	0	1		F6ZR71	NHL repeat-containing protein 2	-0.243421	-0.181039	-0.431696	-0.433173	-0.283071	-0.286408	-0.133353	-0.712112	0.00834347	-0.0602468	0.424062	-0.224081
Q9CQM5	Thioredoxin domain-containing protein 17	no	-0.160895	-0.888397	-0.048809	-0.602554	-0.0176057	-1.01272	-0.148001	-0.762762	0.338239	-0.060948	0.207846	-0.220676	0	Thioredoxin domain-containing protein 17	-0.425164	-0.485272	0.195263	0.239385	0.8524	0	0	0.0601078	1	0		Q91ZE0	Trimethyllysine dioxygenase, mitochondrial	-0.0179867	-0.716245	0.500292	-0.294312	0.136454	-0.872553	0.0156403	-0.359296	0.387362	-0.0288961	-0.0780915	-0.0557712
P32020	Non-specific lipid-transfer protein	no	-0.405845	-1.78351	-1.16636	-1.12168	-0.996007	-1.64641	-0.630875	-1.48767	-0.661055	0.171588	0.373129	-0.439416	0	Non-specific lipid-transfer protein	-1.11935	-1.19024	0.281724	0.23223	0.85268	0	0	0.07089	1	0		P68510	14-3-3 protein eta	-0.262936	-1.61136	-0.617255	-0.813443	-0.841947	-1.50625	-0.467234	-1.0842	-0.611932	0.20364	0.0871912	-0.274512
Q99KI0	Aconitate hydratase, mitochondrial	no	-0.271948	0.435201	-0.751242	-0.353406	-0.152041	0.183496	-0.204227	-0.545945	0.114762	-0.178919	0.580132	-0.22102	0	Aconitate hydratase, mitochondrial	-0.235349	-0.179679	0.246823	0.14928	0.854655	0	0	-0.0556692	0	1		Q8BJU0	Small glutamine-rich tetratricopeptide repeat-containing protein alpha	-0.12904	0.607353	-0.20214	-0.0451634	0.00201835	0.32366	-0.0405859	-0.142479	0.163885	-0.146867	0.294194	-0.0561162
Q9DBP5	UMP-CMP kinase	no	-0.253793	-0.939468	0.297693	-0.55057	0.00272527	-0.930353	0.332873	-0.557661	0.253634	0.0163238	0.250743	0.0472293	0	UMP-CMP kinase	-0.361535	-0.288104	0.260757	0.282155	0.854766	0	0	-0.0734307	0	1		O35864	COP9 signalosome complex subunit 5	-0.110885	-0.767316	0.846794	-0.242328	0.156785	-0.790188	0.496513	-0.154194	0.302758	0.0483758	-0.0351948	0.212134
Q8BFP9	[Pyruvate dehydrogenase [lipoamide]] kinase isozyme 1, mitochondrial	no	0.125526	0.550911	-0.42623	0.321303	0.256173	0.986795	-0.599604	0.223337	-0.0533568	0.001882	-0.116307	-0.237766	0	[Pyruvate dehydrogenase [lipoamide]] kinase isozyme 1, mitochondrial	0.142878	0.216675	0.208669	0.324166	0.855552	0	0	-0.0737974	0	1		Q9CPQ8	ATP synthase subunit g, mitochondrial	0.268434	0.723063	0.122871	0.629545	0.410232	1.12696	-0.435963	0.626803	-0.00423328	0.0339339	-0.402245	-0.0728621
Q8BYC3	Peroxisomal acyl-coenzyme A oxidase 1;Acyl-coenzyme A oxidase	no	0.614371	0.815952	-1.0573	1.50973	-0.108197	0.739749	0.228896	1.51907	-0.715929	-0.316036	1.25148	0.169435	0	Peroxisomal acyl-coenzyme A oxidase 1;Acyl-coenzyme A oxidase	0.470688	0.59488	0.544227	0.353951	0.855601	0	0	-0.124192	0	1		Q20BD0	Heterogeneous nuclear ribonucleoprotein A/B	0.757279	0.988104	-0.508198	1.81797	0.0458623	0.879914	0.392537	1.92254	-0.666805	-0.283984	0.965544	0.334339
Q8BL66	Early endosome antigen 1	no	-0.077336	-1.25765		-1.31163	0.184165	-1.01429		-1.45094	0.267833	0.383382		-0.302266	0	Early endosome antigen 1	-0.882203	-0.760354	0.402735	0.488792	0.857133	0	0	-0.121849	0	1		Q9D1X0	Nucleolar protein 3	0.0655723	-1.08549		-1.00339	0.338225	-0.874128		-1.04747	0.316957	0.415434		-0.137362
E9QN99	Abhydrolase domain-containing protein 14B	no	-0.201471	0.595998	-0.133992		-0.210371	0.640175	-0.405918		-0.0840819	0.163296	-0.29666		0	Abhydrolase domain-containing protein 14B	0.0868449	0.00796197	0.255321	0.321107	0.857338	0	0	0.078883	1	0		O09111	NADH dehydrogenase [ubiquinone] 1 beta subcomplex subunit 11, mitochondrial	-0.0585631	0.76815	0.41511		-0.0563112	0.780339	-0.242277		-0.0349583	0.195348	-0.582598
Q60994	Adiponectin	no	-0.0593885	-0.737554	-0.325185	-0.505227	-0.274103	-0.589383	-0.17196	-0.738263	-0.24881	0.0307605	0.0782102	-0.26593	0	Adiponectin	-0.406839	-0.443427	0.143307	0.132475	0.857498	0	0	0.0365888	1	0		Q61129	Complement factor I;Complement factor I heavy chain;Complement factor I light chain	0.0835197	-0.565402	0.223917	-0.196985	-0.120043	-0.449218	-0.00831944	-0.334797	-0.199686	0.0628125	-0.207728	-0.101026
Q8BTS3	0	no	0.121088	0.986793		-0.0358577	0.116888	0.623472		0.121262	-0.0485467	-0.0989174		0.053443	0	0	0.357341	0.287207	0.31797	0.168137	0.85772	0	0	0.0701338	1	0		E9QMV2	Costars family protein ABRACL	0.263996	1.15894		0.272384	0.270947	0.763636		0.524728	0.000576887	-0.0668655		0.218347
Q9CQZ5	NADH dehydrogenase [ubiquinone] 1 alpha subcomplex subunit 6	no	0.0382579	0.830505	-0.672488	0.705296	0.499092	0.690244	-0.616606	0.676256	0.497931	-0.0562751	-0.104818	0.0726594	0	NADH dehydrogenase [ubiquinone] 1 alpha subcomplex subunit 6	0.225393	0.312247	0.346131	0.312658	0.858479	0	0	-0.0868539	0	1		Q6GT24	Peroxiredoxin-6	0.181166	1.00266	-0.123387	1.01354	0.653152	0.830408	-0.452965	1.07972	0.547055	-0.0242231	-0.390756	0.237564
Q8R123	FAD synthase;Molybdenum cofactor biosynthesis protein-like region;FAD synthase region	no	-2.32858	1.28402	-1.36288	0.117162	-2.92656	0.349461	-0.443152	-0.0751219	-0.695371	-0.257465	-0.0124154	-0.293644	0	FAD synthase;Molybdenum cofactor biosynthesis protein-like region;FAD synthase region	-0.57257	-0.773844	0.797433	0.735617	0.858971	0	0	0.201274	1	0		Q61292	Laminin subunit beta-2	-2.18567	1.45617	-0.813778	0.425404	-2.77251	0.489625	-0.279511	0.328344	-0.646248	-0.225413	-0.298353	-0.12874
Q9D1E6	Tubulin-folding cofactor B	no	-0.268686		-0.334603	-0.583011	0.0171473		-0.344823	-0.723084	0.107402		0.0590566	-0.213152	0	Tubulin-folding cofactor B	-0.395433	-0.350253	0.0956996	0.213704	0.860262	0	0	-0.0451799	0	1		Q76LV0	Glutathione peroxidase;Phospholipid hydroperoxide glutathione peroxidase, nuclear;Phospholipid hydroperoxide glutathione peroxidase, mitochondrial	-0.125777		0.214498	-0.274769	0.171207		-0.181182	-0.319618	0.156526		-0.226881	-0.0482481
Q9JLT4	Thioredoxin reductase 2, mitochondrial	no	-0.0733436	0.50689	-0.638752	-0.322455	-0.223602	0.272816	-0.380511	-0.410375	-0.185772	-0.0583158	0.324374	0.036855	0	Thioredoxin reductase 2, mitochondrial	-0.131915	-0.185418	0.242331	0.158141	0.860355	0	0	0.0535028	1	0		Q9D892	Inosine triphosphate pyrophosphatase	0.0695647	0.679042	-0.0896511	-0.0142124	-0.0695427	0.412981	-0.21687	-0.00690831	-0.136648	-0.0262638	0.0384361	0.201759
Q60590	Alpha-1-acid glycoprotein 1	no	-0.800422	-0.685238	-0.300081	0.176187	-0.0873849	-0.839627	-0.198407	-0.282545	0.725716	-0.227453	0.115154	-0.480768	0	Alpha-1-acid glycoprotein 1	-0.402389	-0.351991	0.220539	0.167386	0.861975	0	0	-0.0503976	0	1		Q9EQH2	Endoplasmic reticulum aminopeptidase 1	-0.657513	-0.513086	0.249021	0.484429	0.0666747	-0.699463	-0.0347662	0.120922	0.77484	-0.195401	-0.170784	-0.315864
Q6ZWZ6	40S ribosomal protein S12	no	-0.0918842	-1.70646	0.0349954		0.0535835	-1.53955	0.158518		0.140416	0.121753	0.485438		0	40S ribosomal protein S12	-0.587784	-0.442484	0.560537	0.549371	0.862141	0	0	-0.1453	0	1		P62137	Serine/threonine-protein phosphatase PP1-alpha catalytic subunit;Serine/threonine-protein phosphatase	0.051024	-1.53431	0.584097		0.207643	-1.39939	0.322159		0.18954	0.153805	0.1995
Q8R146	Acylamino-acid-releasing enzyme	no	0.0587255	0.806141	-0.129778	0.543436	0.0838711	0.824493	-0.109279	0.265815	-0.00970445	-0.0189828	-0.135461	-0.147552	0	Acylamino-acid-releasing enzyme	0.319631	0.266225	0.215411	0.201229	0.862224	0	0	0.0534058	1	0		P52196	Thiosulfate sulfurtransferase;Sulfurtransferase	0.201634	0.978293	0.419323	0.851678	0.237931	0.964658	0.0543624	0.669281	0.0394191	0.0130691	-0.421399	0.0173518
Q9D881	Cytochrome c oxidase subunit 5B, mitochondrial	no	-0.072519	-0.792081	0.865522	-0.0125475	0.944764	-0.791939	0.170927	0.0206793	0.886789	0.0223104	-0.804742	0.168977	0	Cytochrome c oxidase subunit 5B, mitochondrial	-0.00290656	0.0861079	0.33935	0.355871	0.862324	0	0	-0.0890145	0	1		Q8K4Z3	NAD(P)H-hydrate epimerase	0.0703893	-0.619929	1.41462	0.295695	1.09882	-0.651775	0.334568	0.424146	0.935912	0.0543624	-1.09068	0.333882
Q8BH64	EH domain-containing protein 2	no	0.204077	0.673083	-0.430874	1.48232	0.0701042	0.901283	-0.295555	1.682	-0.184012	0.12279	0.205911	0.141125	0	EH domain-containing protein 2	0.482151	0.589458	0.402878	0.441952	0.86355	0	0	-0.107307	0	1	F6ZSC6	P97379	Ras GTPase-activating protein-binding protein 2	0.346985	0.845235	0.118227	1.79056	0.224164	1.04145	-0.131914	2.08547	-0.134889	0.154842	-0.0800269	0.306029
E9QK48	Echinoderm microtubule-associated protein-like 2	no	0.19166	0.590505	-0.343584	0.447967	0.0460681	0.656146	-0.238325	0.22657	-0.181496	-0.0319076	0.0197954	-0.212168	0	Echinoderm microtubule-associated protein-like 2	0.221637	0.172615	0.205682	0.187439	0.86601	0	0	0.0490222	1	0		Q60932	Voltage-dependent anion-selective channel protein 1	0.334568	0.762657	0.205518	0.756209	0.200128	0.79631	-0.0746842	0.630037	-0.132372	0.000144286	-0.266143	-0.0472639
P48722	Heat shock 70 kDa protein 4L	no	-0.348322	0.695074		0.0399645	-0.00414993	0.658503		-0.0607221	0.300355	-0.0663304		0.0148615	0	Heat shock 70 kDa protein 4L	0.128905	0.197877	0.304468	0.230891	0.866141	0	0	-0.0689715	0	1		P23927	Alpha-crystallin B chain	-0.205414	0.867226		0.348207	0.14991	0.798667		0.342744	0.349479	-0.0342785		0.179766
Q8R164	Valacyclovir hydrolase	no	0.217063	1.03438	-0.727375	0.434651	0.230322	0.780352	-0.403463	0.0399916	-0.00479932	-0.173673	0.405626	-0.360652	0	Valacyclovir hydrolase	0.239679	0.161801	0.365748	0.245231	0.866252	0	0	0.0778783	1	0		Q9DCL8	Protein phosphatase inhibitor 2	0.359971	1.20653	-0.178274	0.742893	0.384381	0.920516	-0.239822	0.443458	0.0443242	-0.141621	0.119688	-0.195748
O88543	COP9 signalosome complex subunit 3	no		0.298797	-0.332367	0.090746		0.560239	-0.598141	0.312091		-0.173721	-0.356814	0.356046	0	COP9 signalosome complex subunit 3	0.0190585	0.0913962	0.185693	0.352132	0.867279	0	0	-0.0723377	0	1		Q60668	Heterogeneous nuclear ribonucleoprotein D0		0.470949	0.216734	0.398988		0.700404	-0.4345	0.715557		-0.141669	-0.642752	0.52095
P60335	Poly(rC)-binding protein 1	no	-0.122139	-0.73316	0.367605	-0.315725	0.220674	-0.487944	-0.414974	0.079107	0.438569	0.122661	-0.838817	0.164966	0	Poly(rC)-binding protein 1	-0.200855	-0.150784	0.22838	0.176612	0.868363	0	0	-0.0500709	0	1		Q8BTS3		0.0207689	-0.561008	0.916706	-0.00748262	0.374733	-0.347779	-0.251333	0.482573	0.487692	0.154713	-1.12475	0.32987
Q64010	Adapter molecule crk	no	0.372804	-1.40696	-0.0499313	-0.737135	0.092531	-1.25879	0.418048	-0.697543	-0.243782	0.108858	0.146337	0.112961	0	Adapter molecule crk	-0.455306	-0.361439	0.391064	0.379901	0.868972	0	0	-0.0938669	0	1		P27612	Phospholipase A-2-activating protein	0.515712	-1.23481	0.49917	-0.428893	0.246591	-1.11863	0.581689	-0.294077	-0.194658	0.140909	-0.139601	0.277866
E9QAQ5	Glycogen synthase kinase-3 beta	no	0.761749		-0.521098	0.728787	-0.68983		-0.0236476	1.3014	-1.45875		0.237466	0.684214	0	Glycogen synthase kinase-3 beta	0.323146	0.195974	0.422229	0.585213	0.869481	0	0	0.127172	1	0	Q9QUI0	P97290	Plasma protease C1 inhibitor	0.904658		0.0280033	1.03703	-0.535771		0.139993	1.70487	-1.40962		-0.0484719	0.849118
Q9JHW2	Omega-amidase NIT2	no	-0.242264	0.48143	-0.910833	-0.106351	-0.126481	-0.0377146	-0.316526	-0.510217	0.0241482	-0.457941	0.564518	-0.42791	0	Omega-amidase NIT2	-0.194504	-0.247735	0.285783	0.105055	0.870143	0	0	0.0532302	1	0		Q8VDM4	26S proteasome non-ATPase regulatory subunit 2	-0.0993554	0.653582	-0.361731	0.201891	0.0275787	0.10245	-0.152885	-0.10675	0.0732718	-0.425889	0.27858	-0.263006
O09174	Alpha-methylacyl-CoA racemase	no	-0.0213623	-0.0506028	-1.2871	0.191527	-0.411777	0.0172187	-0.73945	-0.287697	-0.368169	-0.0131329	0.456504	-0.52199	0	Alpha-methylacyl-CoA racemase	-0.291885	-0.355426	0.336098	0.156552	0.871792	0	0	0.0635415	1	0		P35486	Pyruvate dehydrogenase E1 component subunit alpha, somatic form, mitochondrial	0.121546	0.121549	-0.738	0.499769	-0.257718	0.157383	-0.575809	0.115769	-0.319046	0.018919	0.170566	-0.357086
Q8CIB5	Fermitin family homolog 2	no	-0.084384	0.753781	0.370353	0.350273	-0.276614	0.967515	-0.00375345	0.950925	-0.124431	0.132091	-0.241865	0.513077	0	Fermitin family homolog 2	0.347506	0.409518	0.171298	0.322238	0.872332	0	0	-0.0620122	0	1		Q8CIN4	Serine/threonine-protein kinase PAK 2;PAK-2p27;PAK-2p34	0.0585242	0.925933	0.919454	0.658515	-0.122554	1.10768	0.159887	1.35439	-0.0753072	0.164143	-0.527803	0.677982
P50247	Adenosylhomocysteinase	no	0.15399	0.345702	-0.175592	0.190507	0.0149674	0.442801	-0.109835	0.0583732	-0.0699323	0.0382001	0.0722833	-0.094515	0	Adenosylhomocysteinase	0.128652	0.101577	0.109599	0.119198	0.872739	0	0	0.0270748	1	0		P45376	Aldose reductase	0.296898	0.517854	0.373509	0.498749	0.169027	0.582966	0.0538064	0.461839	-0.0208088	0.070252	-0.213655	0.0703893
P99027	60S acidic ribosomal protein P2	no		-1.32706	0.735887	-0.312132		-0.768985	0.171728	-0.653821		0.632249	-0.518588	-0.144135	0	60S acidic ribosomal protein P2	-0.301101	-0.417026	0.595547	0.296248	0.872979	0	0	0.115925	1	0		Q9D0F9	Phosphoglucomutase-1		-1.15491	1.28499	-0.00388999		-0.62882	0.335369	-0.250355		0.664301	-0.804526	0.0207689
P48036	Annexin A5	no	0.418491	-0.475728	0.970139	-0.0958083	0.321855	-0.438353	0.525479	0.155454	-0.122987	0.119027	-0.434864	0.179924	0	Annexin A5	0.204273	0.141109	0.314231	0.207443	0.873109	0	0	0.0631645	1	0	O70423	Q9D0I6	WD repeat, SAM and U-box domain-containing protein 1	0.5614	-0.303576	1.51924	0.212434	0.475915	-0.298189	0.68912	0.55892	-0.0738639	0.151079	-0.720802	0.344828
P09103	Protein disulfide-isomerase	no	0.424442	0.0767784	1.45443	0.0132172	0.351933	0.157799	0.747705	0.469614	-0.0502205	0.205512	-0.747868	0.428497	0	Protein disulfide-isomerase	0.492217	0.431763	0.333226	0.123383	0.873561	0	0	0.060454	1	0		F8WGC2	Annexin;Annexin A7	0.567351	0.24893	2.00353	0.321459	0.505992	0.297963	0.911346	0.87308	-0.00109689	0.237564	-1.03381	0.593402
P42932	T-complex protein 1 subunit theta	no	0.0443527	0.0853069	0.0251456	-0.311701	-0.550748	0.271683	-0.303926	0.273152	-0.717395	-0.239696	-0.416812	0.376016	0	T-complex protein 1 subunit theta	-0.0392238	-0.0774595	0.0916878	0.20819	0.874448	0	0	0.0382357	1	0		P51885	Lumican	0.187261	0.257459	0.574247	-0.00345838	-0.396688	0.411848	-0.140285	0.676618	-0.668272	-0.207644	-0.70275	0.54092
P97823	Acyl-protein thioesterase 1	no	-0.161728	-0.08924	-0.566183	-0.458022	-0.299378	-0.050805	-0.300194	-0.746476	-0.113935	-0.0981168	0.159751	-0.308978	0	Acyl-protein thioesterase 1	-0.318793	-0.349213	0.114728	0.144842	0.874914	0	0	0.0304201	1	0		P70670	Nascent polypeptide-associated complex subunit alpha, muscle-specific form	-0.0188196	0.0829121	-0.0170813	-0.14978	-0.145318	0.0893595	-0.136553	-0.34301	-0.0648118	-0.0660648	-0.126187	-0.144074
Q9WV98	Mitochondrial import inner membrane translocase subunit Tim9	no	-0.530867	-1.57307	-0.751258	-1.39101	-1.21407	-2.13032	0.0407502	-1.27956	-0.402961	-0.344866	0.847728	0.219588	0	Mitochondrial import inner membrane translocase subunit Tim9	-1.06155	-1.1458	0.249684	0.447189	0.876178	0	0	0.0842463	1	0		Q6P1B1	Xaa-Pro aminopeptidase 1	-0.387959	-1.40092	-0.202157	-1.08277	-1.06001	-1.99016	0.204391	-0.876094	-0.353837	-0.312814	0.56179	0.384492
P07758	Alpha-1-antitrypsin 1-1	no	-0.5651	-0.751042		0.222143	-0.431471	-0.457932		-0.0368881	0.20305	0.373723		-0.183431	0	Alpha-1-antitrypsin 1-1	-0.364667	-0.308764	0.298274	0.136152	0.87619	0	0	-0.055903	0	1		Q8R146	Acylamino-acid-releasing enzyme	-0.422192	-0.57889		0.530385	-0.277411	-0.317767		0.366578	0.252173	0.405775		-0.0185272
P54728	UV excision repair protein RAD23 homolog B	no	-0.436921	-0.948761	-0.35615	-0.814031	-0.31489	-1.25926	-0.133941	-1.04778	-0.0422152	-0.268436	0.175365	-0.0585559	0	UV excision repair protein RAD23 homolog B	-0.638966	-0.688968	0.143593	0.27416	0.878604	0	0	0.0500015	1	0		P10518	Delta-aminolevulinic acid dehydratase	-0.294013	-0.776609	0.192952	-0.505789	-0.16083	-1.11909	0.0297002	-0.644318	0.00690831	-0.236384	-0.110573	0.106348
Q9QUM9	Proteasome subunit alpha type-6	no	0.173817	0.841503	0.125902	0.297463	0.226559	0.810093	0.132082	0.411581	0.0631094	0.0851111	-0.184391	0.198996	0	Proteasome subunit alpha type-6	0.359671	0.395079	0.164626	0.150021	0.878951	0	0	-0.0354076	0	1		P97807	Fumarate hydratase, mitochondrial	0.316725	1.01365	0.675003	0.605705	0.380619	0.950258	0.295723	0.815047	0.112233	0.117163	-0.470329	0.3639
Q9R1P4	Proteasome subunit alpha type-1;Proteasome subunit alpha type	no	-0.0512422	1.13649	0.17284	0.373806	0.183709	1.21113	-0.0572925	0.533224	0.219311	0.0300698	0.0200383	0.14985	0	Proteasome subunit alpha type-1;Proteasome subunit alpha type	0.407974	0.467693	0.257888	0.27587	0.87956	0	0	-0.0597186	0	1		Q9QUH0	Glutaredoxin-1	0.091666	1.30865	0.721941	0.682048	0.337768	1.35129	0.106348	0.93669	0.268434	0.0621218	-0.2659	0.314755
F8WGT0	Talin-1	no	0.376432	-0.921729	0.467894	-0.455419	0.409782	-0.626415	-0.568271	-0.0109126	0.0561522	0.25908	-1.02736	0.473401	0	Talin-1	-0.133205	-0.198954	0.334993	0.245804	0.879911	0	0	0.0657489	1	0		Q9DCB8	Iron-sulfur cluster assembly 2 homolog, mitochondrial	0.519341	-0.749577	1.017	-0.147176	0.563841	-0.486251	-0.40463	0.392554	0.105276	0.291132	-1.3133	0.638305
Q60692	Proteasome subunit beta type-6	no	-0.0781634	0.52495	0.0683853	-0.0921262	0.14037	0.245663	-1.335e-05	-0.0650517	0.339231	0.0825817	-0.0227423	0.0557971	0	Proteasome subunit beta type-6	0.105761	0.0802419	0.144368	0.0698395	0.880718	0	0	0.0255194	1	0		O35129	Prohibitin-2	0.0647449	0.697102	0.617487	0.216116	0.29443	0.385827	0.163628	0.338415	0.388355	0.114634	-0.30868	0.220701
Q9WTR5	Cadherin-13	no	-0.2719	-1.5801	-0.171811	-0.575958	-0.547712	-1.22695	-0.189141	-0.882179	-0.340716	0.347125	-0.308113	-0.163751	0	Cadherin-13	-0.649943	-0.711495	0.32174	0.22258	0.880765	0	0	0.0615522	1	0		Q8VEM8	Phosphate carrier protein, mitochondrial	-0.128992	-1.40795	0.37729	-0.267715	-0.393653	-1.08678	-0.0255001	-0.478713	-0.291592	0.379177	-0.594051	0.00115371
O35129	Prohibitin-2	no	-2.89408	3.41436	-0.0252381	2.26222	-0.662812	1.44824	-1.08788	2.05865	2.21964	-2.20446	-1.11273	-0.135063	0	Prohibitin-2	0.689315	0.43905	1.39198	0.773906	0.881671	0	0	0.250265	1	0		P01873	Ig mu chain C region membrane-bound form;Ig mu chain C region secreted form	-2.75117	3.58651	0.523863	2.57046	-0.508752	1.5884	-0.924235	2.46212	2.26876	-2.17241	-1.39867	0.0298416
P09411	Phosphoglycerate kinase 1	no	-0.232314	-0.0964192	-0.146925	-0.485969	-0.341159	-0.270436	0.0755127	-0.517967	-0.112503	-0.0684594	0.207085	-0.0175977	0	Phosphoglycerate kinase 1	-0.240407	-0.263512	0.0865243	0.124419	0.884403	0	0	0.0231057	1	0		Q91XE4	Aspartoacylase-2	-0.0894055	0.0757329	0.402176	-0.177727	-0.187099	-0.130272	0.239154	-0.1145	-0.063379	-0.0364075	-0.0788531	0.147307
Q63918	Serum deprivation-response protein	no	-0.603933	-1.00492	-0.530182	-0.96771	-0.657526	-1.2398	-0.445062	-0.637109	-0.107191	-0.17353	0.0768434	0.246847	0	Serum deprivation-response protein	-0.776687	-0.744873	0.122198	0.171775	0.885505	0	0	-0.0318132	0	1		Q9R0P5	Destrin	-0.461025	-0.832769	0.018919	-0.659468	-0.503466	-1.09963	-0.281421	-0.233643	-0.0580674	-0.141478	-0.209094	0.411752
Q99LC5	Electron transfer flavoprotein subunit alpha, mitochondrial	no	-0.602385	-0.758364	-1.05504	-1.00361	-0.500156	-1.00053	-0.376827	-1.74295	0.0480827	-0.272981	0.680342	-0.701282	0	Electron transfer flavoprotein subunit alpha, mitochondrial	-0.854851	-0.905115	0.106167	0.310127	0.886139	0	0	0.0502637	1	0		P49182	Heparin cofactor 2	-0.459477	-0.586212	-0.505943	-0.69537	-0.346096	-0.860367	-0.213186	-1.33948	0.0972062	-0.240929	0.394404	-0.536378
P62141	Serine/threonine-protein phosphatase PP1-beta catalytic subunit	no	0.588449	0.970297	0.0921674	0.847999	0.251933	1.19732	-0.286054	1.09357	-0.339304	0.224838	-0.166198	0.210497	0	Serine/threonine-protein phosphatase PP1-beta catalytic subunit	0.624728	0.564193	0.194552	0.353732	0.887073	0	0	0.0605351	1	0		Q61599	Rho GDP-dissociation inhibitor 2	0.731357	1.14245	0.641269	1.15624	0.405992	1.33749	-0.122413	1.49704	-0.29018	0.25689	-0.452136	0.375401
Q8BZA9	Probable fructose-2,6-bisphosphatase TIGAR	no	-0.477261	0.165588	-0.58146	-0.312564	-0.0880738	0.294082	-0.477495	-0.766132	0.306907	0.0313129	0.260908	-0.241169	0	Probable fructose-2,6-bisphosphatase TIGAR	-0.301424	-0.259405	0.165218	0.230947	0.887697	0	0	-0.0420197	0	1		Q8BHN3	Neutral alpha-glucosidase AB	-0.334353	0.33774	-0.0323592	-0.00432164	0.0659858	0.434247	-0.313854	-0.362666	0.356031	0.0633648	-0.0250302	-0.0762651
Q811I0	ATP synthase mitochondrial F1 complex assembly factor 1	no	-0.147967	-1.00225	-0.615801	-0.46942	-0.377855	-0.945952	0.169554	-0.896396	-0.281282	-0.0551898	0.972013	-0.468127	0	ATP synthase mitochondrial F1 complex assembly factor 1	-0.558858	-0.512662	0.177169	0.261181	0.889053	0	0	-0.0461959	0	1		Q6WVG3	BTB/POZ domain-containing protein KCTD12	-0.00505827	-0.830093	-0.0666993	-0.161178	-0.223795	-0.805788	0.333195	-0.49293	-0.232159	-0.0231379	0.686075	-0.303223
Q62234	Myomesin-1	no	-0.447128	-0.885408	-0.300324	-1.40004	-1.05367	-0.113768	-0.619017	-1.05377	-0.569996	0.687175	-0.268484	0.345551	0	Myomesin-1	-0.758226	-0.710058	0.247413	0.223618	0.889933	0	0	-0.0481681	0	1	P51150	P01867	Ig gamma-2B chain C region	-0.30422	-0.713256	0.248778	-1.0918	-0.899614	0.0263961	-0.455376	-0.650305	-0.520873	0.719227	-0.554422	0.510456
B1B1A8	Myosin light chain kinase, smooth muscle;Myosin light chain kinase, smooth muscle, deglutamylated form	no	0.123848	0.520233	-0.0259407	-0.866902	0.0190679	0.674882	-0.646537	-0.537424	-0.0996409	-0.299965	-0.792321	0.260985	0	Myosin light chain kinase, smooth muscle;Myosin light chain kinase, smooth muscle, deglutamylated form	-0.0621903	-0.122503	0.291933	0.303128	0.890742	0	0	0.0603123	1	0		O08749	Dihydrolipoyl dehydrogenase, mitochondrial;Dihydrolipoyl dehydrogenase	0.266757	0.692385	0.523161	-0.558659	0.173127	0.815047	-0.482896	-0.133958	-0.0505174	-0.267913	-1.07826	0.425889
A2ASS6	Titin	no	-1.22544	-0.915452	-0.719089	-1.19421	-1.28383	-0.538624	-0.970992	-1.38868	-0.327427	0.224355	-0.224293	-0.455808	0	Titin	-1.01355	-1.04553	0.120369	0.190841	0.892749	0	0	0.0319827	1	0		Q91VD9	NADH-ubiquinone oxidoreductase 75 kDa subunit, mitochondrial	-1.08253	-0.7433	-0.169988	-0.885965	-1.12977	-0.39846	-0.807351	-0.985209	-0.278304	0.256407	-0.510231	-0.290903
Q8R016	Bleomycin hydrolase	no	-0.062387	0.526073	0.0904089		-0.0836704	0.66016	0.100235		-0.0980431	0.100327	0.00442892		0	Bleomycin hydrolase	0.184698	0.225575	0.176294	0.223684	0.893175	0	0	-0.0408766	0	1	P21981	Q60631	Growth factor receptor-bound protein 2	0.0805212	0.698225	0.63951		0.0703893	0.800324	0.263876		-0.0489195	0.132379	-0.281509
D3Z7Q5	Programmed cell death protein 5	no	-0.566493	-1.4667	-0.233535		-0.780306	-1.46353	-0.241915		-0.027786	-0.19917	0.115528		0	Programmed cell death protein 5	-0.755576	-0.828585	0.368324	0.353476	0.893203	0	0	0.0730096	1	0		P00920	Carbonic anhydrase 2	-0.423584	-1.29455	0.315566		-0.626246	-1.32337	-0.0782743		0.0213375	-0.167118	-0.17041
Q9Z2M7	Phosphomannomutase 2	no	0.0404193	0.778245	-0.168815	-0.0614187	0.0358598	0.785906	-0.0151623	-0.0540837	-0.0595776	-0.080494	0.126816	-0.012656	0	Phosphomannomutase 2	0.147108	0.18813	0.214672	0.200108	0.893429	0	0	-0.0410222	0	1		D3YTN4	GTPase IMAP family member 4	0.183328	0.950397	0.380286	0.246823	0.189919	0.92607	0.148479	0.349382	-0.010454	-0.0484421	-0.159122	0.152248
Q91V16	LYR motif-containing protein 5	no	-0.222737	0.395038	-0.676737	0.403269	-0.286274	-0.400431	0.416311	0.357282	-0.123154	-0.718202	0.839593	-0.0326566	0	LYR motif-containing protein 5	-0.0252917	0.0217222	0.261997	0.212402	0.893891	0	0	-0.0470139	0	1		Q9DC69	NADH dehydrogenase [ubiquinone] 1 alpha subcomplex subunit 9, mitochondrial	-0.0798287	0.56719	-0.127636	0.711512	-0.132214	-0.260267	0.579952	0.760749	-0.0740309	-0.68615	0.553655	0.132248
Q60759	Glutaryl-CoA dehydrogenase, mitochondrial	no	-0.221563	0.574754	-0.883181	-0.160832	-0.534618	0.489716	-0.37392	-0.485351	-0.427618	-0.196532	0.723592	-0.418815	0	Glutaryl-CoA dehydrogenase, mitochondrial	-0.172706	-0.226043	0.298049	0.240942	0.894064	0	0	0.0533378	1	0		Q5EBP8	Heterogeneous nuclear ribonucleoprotein A1	-0.0786551	0.746906	-0.33408	0.14741	-0.380559	0.62988	-0.210279	-0.081885	-0.378494	-0.16448	0.437654	-0.253911
P70349	Histidine triad nucleotide-binding protein 1	no	-0.435684	-0.898547	-0.48105	-1.117	-0.643867	-0.973014	-0.234001	-1.23275	-0.0891012	-0.0185539	0.432724	-0.0697225	0	Histidine triad nucleotide-binding protein 1	-0.73307	-0.770908	0.165009	0.215745	0.894068	0	0	0.0378379	1	0		Q9CQZ5	NADH dehydrogenase [ubiquinone] 1 alpha subcomplex subunit 6	-0.292776	-0.726395	0.0680517	-0.808756	-0.489808	-0.83285	-0.0703604	-0.829281	-0.0399777	0.013498	0.146786	0.0951818
P51859	Hepatoma-derived growth factor	no	0.0996637	-1.49518	0.248576	-0.893012	0.121663	-1.23595	0.0901063	-0.721696	0.0350767	0.441995	0.106897	0.222569	0	Hepatoma-derived growth factor	-0.509987	-0.43647	0.414769	0.330318	0.894482	0	0	-0.073517	0	1		Q8C878	NEDD8-activating enzyme E1 catalytic subunit	0.242572	-1.32302	0.797677	-0.58477	0.275722	-1.09579	0.253747	-0.31823	0.0842003	0.474047	-0.179041	0.387473
Q9R0Q7	Prostaglandin E synthase 3	no	0.490477	0.227978	0.473373	0.0354904	0.183594	0.221938	0.0937318	0.840536	-0.265675	0.171087	-0.219903	0.712526	0	Prostaglandin E synthase 3	0.306829	0.33495	0.108515	0.170656	0.894751	0	0	-0.0281206	0	1		P08228	Superoxide dismutase [Cu-Zn]	0.633385	0.40013	1.02247	0.343732	0.337654	0.362102	0.257373	1.244	-0.216552	0.203139	-0.505841	0.87743
Q20BD0	Heterogeneous nuclear ribonucleoprotein A/B	no	-0.0652551	-0.943362	0.838096	-0.146411	0.402836	-0.723972	0.243113	0.00581199	0.57839	0.131189	-0.607982	-0.0152547	0	Heterogeneous nuclear ribonucleoprotein A/B	-0.0792331	-0.0180528	0.364339	0.249039	0.894856	0	0	-0.0611802	0	1		F8WIS7	Nesprin-1	0.0776532	-0.771209	1.3872	0.161831	0.556895	-0.583808	0.406754	0.409278	0.627513	0.163241	-0.89392	0.14965
P62259	14-3-3 protein epsilon	no	0.483858	-1.33662	-0.192169	-1.15383	-0.485178	-1.3147	0.0199409	-0.68798	-0.987251	0.066637	0.0519648	0.468108	0	14-3-3 protein epsilon	-0.54969	-0.616979	0.426251	0.276118	0.899625	0	0	0.0672891	1	0		Q9QZ88	Vacuolar protein sorting-associated protein 29	0.626766	-1.16446	0.356932	-0.845591	-0.331118	-1.17453	0.183582	-0.284514	-0.938127	0.098689	-0.233973	0.633013
D3YXK8	Eukaryotic translation initiation factor 1;Eukaryotic translation initiation factor 1b	no	-0.36763	-1.03141		-0.428461	-0.503865	-0.812182		-0.412813	-0.0900805	0.309592		0.256252	0	Eukaryotic translation initiation factor 1;Eukaryotic translation initiation factor 1b	-0.609166	-0.576287	0.211849	0.120841	0.900854	0	0	-0.032879	0	1		P51174	Long-chain specific acyl-CoA dehydrogenase, mitochondrial	-0.224722	-0.859254		-0.120219	-0.349805	-0.672018		-0.00934718	-0.0409569	0.341644		0.421156
P60840	Alpha-endosulfine	no	-0.724448	-1.69089		-1.08569	-0.302189	-1.58796		-1.41525	0.394377	0.306059		-0.0699927	0	Alpha-endosulfine	-1.16701	-1.1018	0.281935	0.402901	0.901612	0	0	-0.0652128	0	1		P16332	Methylmalonyl-CoA mutase, mitochondrial	-0.58154	-1.51874		-0.777451	-0.148129	-1.44779		-1.01178	0.443501	0.33811		0.0949116
Q8K182	Complement component C8 alpha chain	no		0.78885	0.372335	0.968802		1.03459	0.425164	0.767935		0.0055411	-0.268992	-0.170049	0	Complement component C8 alpha chain	0.709996	0.742562	0.176641	0.176382	0.9025	0	0	-0.0325663	0	1		P20029	78 kDa glucose-regulated protein		0.961002	0.921436	1.27704		1.17475	0.588804	1.1714		0.037593	-0.55493	-0.00514517
Q8CG76	Aflatoxin B1 aldehyde reductase member 2	no	0.131264	0.247953	-0.850705	-0.106318	0.144012	0.109075	-0.408771	-0.277075	-0.124568	-0.263601	0.582718	-0.267989	0	Aflatoxin B1 aldehyde reductase member 2	-0.144451	-0.10819	0.246686	0.138348	0.903268	0	0	-0.0362617	0	1		Q00898	Alpha-1-antitrypsin 1-5	0.274172	0.420105	-0.301604	0.201925	0.298072	0.249239	-0.24513	0.126391	-0.075444	-0.231549	0.29678	-0.103085
E9Q3P4	0	no		-0.232199	-1.5413	-0.527085		-0.347808	-1.42871	-0.720655		-0.106204	0.275629	-0.125906	0	0	-0.766863	-0.83239	0.396467	0.316991	0.903804	0	0	0.0655274	1	0		Q9D6J6	NADH dehydrogenase [ubiquinone] flavoprotein 2, mitochondrial		-0.0600474	-0.992202	-0.218843		-0.207643	-1.26507	-0.317188		-0.0741525	-0.0103088	0.038998
P99029	Peroxiredoxin-5, mitochondrial	no	-0.401057	-1.22325	-0.829559	-1.08443	-0.470767	-1.46774	-0.386964	-1.38408	-0.156321	-0.201667	0.383953	-0.263209	0	Peroxiredoxin-5, mitochondrial	-0.884573	-0.927386	0.180614	0.288834	0.904851	0	0	0.0428131	1	0		Q6P069	Sorcin	-0.258149	-1.05109	-0.280457	-0.776188	-0.316708	-1.32757	-0.223323	-0.98061	-0.107197	-0.169615	0.0980152	-0.0983047
P80315	T-complex protein 1 subunit delta	no	0.0555859	0.437532	-0.505617	-0.0259963	-0.649307	0.517781	-0.510251	0.421948	-0.65062	-0.0421573	0.133566	0.583557	0	T-complex protein 1 subunit delta	-0.00962369	-0.054957	0.193752	0.304961	0.904963	0	0	0.0453333	1	0		P37804	Transgelin	0.198494	0.609684	0.0434844	0.282246	-0.495247	0.657946	-0.34661	0.825415	-0.601496	-0.0101053	-0.152372	0.748461
Q99JY0	Trifunctional enzyme subunit beta, mitochondrial;3-ketoacyl-CoA thiolase	no	0.383461	0.650606	-1.09864	0.589033	0.0227737	0.511649	-0.60062	0.847695	-0.34388	-0.277284	0.510102	0.26431	0	Trifunctional enzyme subunit beta, mitochondrial;3-ketoacyl-CoA thiolase	0.131116	0.195374	0.413877	0.314768	0.905962	0	0	-0.0642586	0	1		Q91VI7	Ribonuclease inhibitor	0.526369	0.822758	-0.549536	0.897275	0.176833	0.651813	-0.436979	1.25116	-0.294756	-0.245232	0.224164	0.429214
Q9CZN7	Serine hydroxymethyltransferase	no	0.344784		-0.64218	1.03769	-0.660289		0.0901063	1.62574	-1.07201		0.843127	0.547383	0	Serine hydroxymethyltransferase	0.246764	0.351852	0.487407	0.672771	0.906005	0	0	-0.105088	0	1	Q91XV3	B7ZCF1	26S protease regulatory subunit 6A	0.487692		-0.0930786	1.34593	-0.50623		0.253747	2.02921	-1.02289		0.55719	0.712288
O70475	UDP-glucose 6-dehydrogenase	no	0.738208		2.35361	0.534714	0.923867		1.45126	1.01762	0.269685		-0.985767	0.344031	0	UDP-glucose 6-dehydrogenase	1.20884	1.13092	0.575389	0.162441	0.906754	0	0	0.0779276	1	0		Q792Z0		0.881116		2.90271	0.842956	1.07793		1.6149	1.42109	0.318808		-1.27171	0.508936
P70168	Importin subunit beta-1	no	-0.234326	0.678979	1.28719	0.398222	0.266665	0.738979	0.665803	0.624856	0.466387	0.0346228	-0.539502	0.166113	0	Importin subunit beta-1	0.532516	0.574076	0.31584	0.105153	0.907201	0	0	-0.0415602	0	1		Q9R1P3	Proteasome subunit beta type-2	-0.0914176	0.851131	1.83629	0.706465	0.420725	0.879144	0.829444	1.02832	0.515511	0.0666747	-0.82544	0.331017
Q04447	Creatine kinase B-type	no	0.0737017	-0.149381	0.83644	-0.138222	-0.0371625	0.0300023	0.874795	-0.0886439	-0.0590255	0.119547	0.161498	0.124222	0	Creatine kinase B-type	0.155635	0.194748	0.232665	0.22798	0.908346	0	0	-0.0391129	0	1		P32921	Tryptophan--tRNA ligase, cytoplasmic;T1-TrpRS;T2-TrpRS	0.21661	0.0227713	1.38554	0.170021	0.116897	0.170167	1.03844	0.314822	-0.00990192	0.151599	-0.12444	0.289126
P68037	Ubiquitin-conjugating enzyme E2 L3	no	-0.107847	-0.889187	-0.21419	-0.723676	-0.0969213	-0.94999	-0.0987581	-0.936731	-0.000468905	0.0646148	-0.162531	-0.00695507	0	Ubiquitin-conjugating enzyme E2 L3	-0.483725	-0.5206	0.190593	0.244096	0.909328	0	0	0.036875	1	0		Q8BG40	Katanin p80 WD40-containing subunit B1	0.0350608	-0.717035	0.334911	-0.415434	0.0571383	-0.809826	0.0648829	-0.533264	0.0486547	0.0966667	-0.448469	0.157949
Q564G0	Guanylate kinase	no	0.0979555		-0.549549	-0.771237	-0.245739		-0.254797	-0.616098	-0.461816		-0.100813	-0.10458	0	Guanylate kinase	-0.40761	-0.372211	0.260758	0.121971	0.910328	0	0	-0.0353987	0	1		P06151	L-lactate dehydrogenase A chain;L-lactate dehydrogenase	0.240864		-0.00044731	-0.462995	-0.0916789		-0.0911564	-0.212632	-0.412693		-0.386751	0.0603242
O09061	Proteasome subunit beta type-1	no	0.20691	0.632727	0.129692	0.299748	0.28551	0.470203	-0.147287	0.570201	-0.0149078	0.0578529	-0.266388	0.181514	0	Proteasome subunit beta type-1	0.317269	0.294657	0.110749	0.158677	0.911224	0	0	0.0226126	1	0		Q9CPX4	Ferritin;Ferritin light chain 1;Ferritin light chain 2	0.349818	0.804879	0.678793	0.60799	0.43957	0.610367	0.0163537	0.973667	0.0342158	0.0899048	-0.552326	0.346418
P29699	Alpha-2-HS-glycoprotein	no	-0.4324	-0.698421	1.10868	-0.0262419	0.115692	-0.944466	0.863867	-0.334832	0.510026	-0.12607	-0.182833	-0.225076	0	Alpha-2-HS-glycoprotein	-0.0120969	-0.0749347	0.398333	0.380933	0.912957	0	0	0.0628377	1	0		F8WJ05	Inter-alpha-trypsin inhibitor heavy chain H1	-0.289492	-0.526269	1.65778	0.282	0.269751	-0.804301	1.02751	0.0686346	0.559149	-0.0940177	-0.468771	-0.0601716
Q8BK30	NADH dehydrogenase [ubiquinone] flavoprotein 3, mitochondrial	no	0.154929	-1.53291	-0.174145	-0.615204	0.492932	-1.48896	0.0571844	-0.964572	0.180833	0.121883	0.906055	-0.206604	0	NADH dehydrogenase [ubiquinone] flavoprotein 3, mitochondrial	-0.541833	-0.475855	0.366093	0.455331	0.913936	0	0	-0.0659779	0	1		Q9DB77	Cytochrome b-c1 complex subunit 2, mitochondrial	0.297837	-1.36076	0.374956	-0.306962	0.646992	-1.3488	0.220825	-0.561106	0.229957	0.153935	0.620117	-0.0416993
Q9JKB1	Ubiquitin carboxyl-terminal hydrolase isozyme L3;Ubiquitin carboxyl-terminal hydrolase isozyme L4	no	-0.150807	-1.20517	-0.281506	-1.19171	-0.294694	-1.33816	-0.0654909	-1.32741	-0.114222	-0.155989	0.292416	-0.212675	0	Ubiquitin carboxyl-terminal hydrolase isozyme L3;Ubiquitin carboxyl-terminal hydrolase isozyme L4	-0.707297	-0.756439	0.284826	0.336034	0.914908	0	0	0.0491414	1	0		P50247	Adenosylhomocysteinase	-0.00789873	-1.03302	0.267596	-0.883464	-0.140635	-1.19799	0.09815	-0.923948	-0.0650986	-0.123937	0.00647761	-0.0477708
P16045	Galectin-1	no	0.283732	-1.01026	0.760948	-0.545561	0.215546	-0.700977	0.30343	-0.539264	-0.0849541	0.429581	-0.393473	0.0367295	0	Galectin-1	-0.127784	-0.180316	0.399216	0.256685	0.916078	0	0	0.0525317	1	0		Q8BVI4	Dihydropteridine reductase	0.42664	-0.838105	1.31005	-0.237319	0.369606	-0.560813	0.467071	-0.135798	-0.0358306	0.461633	-0.679411	0.201634
P40336	Vacuolar protein sorting-associated protein 26A	no	0.505281	1.1376	0.155859	0.949631	-0.758185	1.48697	0.470395	1.30008	-1.39081	0.192112	0.497199	0.430408	0	Vacuolar protein sorting-associated protein 26A	0.687093	0.624816	0.221199	0.511194	0.916255	0	0	0.0622768	1	0		Q78J03	Methionine-R-sulfoxide reductase B2, mitochondrial	0.648189	1.30975	0.70496	1.25787	-0.604126	1.62714	0.634036	1.70355	-1.34168	0.224164	0.211261	0.595313
O70318	Band 4.1-like protein 2	no	-0.209033	0.996068	2.51435	1.01188	0.8829	1.20584	0.671475	1.82592	0.822405	0.276425	-1.55738	0.467178	0	Band 4.1-like protein 2	1.07832	1.14653	0.557572	0.251704	0.916371	0	0	-0.0682156	0	1		Q91W90	Thioredoxin domain-containing protein 5	-0.0661252	1.16822	3.06345	1.32013	1.03696	1.346	0.835116	2.22938	0.871528	0.308477	-1.84332	0.632082
D3Z494	0	no	-0.0316099	0.400928	-1.0474	0.181282	-0.0966441	0.355591	-0.464107	-0.131099	-0.0429333	0.0466945	0.535565	-0.14627	0	0	-0.1242	-0.0840647	0.32015	0.16835	0.916383	0	0	-0.0401357	0	1		P62737	Actin, aortic smooth muscle;Actin, alpha cardiac muscle 1;Actin, gamma-enteric smooth muscle	0.111298	0.57308	-0.498301	0.489524	0.0574155	0.495756	-0.300466	0.272367	0.00619029	0.0787465	0.249627	0.0186342
E9Q120	Lon protease homolog;Lon protease homolog, mitochondrial	no	-0.237788	0.113554	0.146358	0.487868	-0.130024	-0.0870749	0.694579	-0.0757195	0.115148	-0.135586	0.541741	-0.595199	0	Lon protease homolog;Lon protease homolog, mitochondrial	0.127498	0.10044	0.148282	0.198391	0.916848	0	0	0.0270576	1	0		Q64514	Tripeptidyl-peptidase 2	-0.0948802	0.285706	0.695459	0.79611	0.024036	0.0530895	0.85822	0.327747	0.164271	-0.103534	0.255803	-0.430295
P07759	Serine protease inhibitor A3K	no	-0.446861	-0.694208	0.255696	0.393639	-0.426218	-0.72031	0.295371	0.2027	-0.032342	0.155462	0.0870469	-0.11625	0	Serine protease inhibitor A3K	-0.122933	-0.162114	0.26481	0.24558	0.917166	0	0	0.0391806	1	0		Q9CQ92	Mitochondrial fission 1 protein	-0.303953	-0.522056	0.804797	0.701881	-0.272158	-0.580145	0.459012	0.606167	0.0167816	0.187514	-0.198891	0.0486547
P48758	Carbonyl reductase [NADPH] 1	no	-0.360181	0.164312	-0.481738	-0.149909	-0.192451	0.158792	-0.265611	-0.619083	0.122339	-0.242632	0.130966	-0.434364	0	Carbonyl reductase [NADPH] 1	-0.206879	-0.229588	0.141444	0.159484	0.918683	0	0	0.022709	1	0		Q8VDN2	Sodium/potassium-transporting ATPase subunit alpha-1	-0.217273	0.336464	0.0673633	0.158333	-0.0383915	0.298957	-0.10197	-0.215616	0.171463	-0.21058	-0.154972	-0.26946
P62858	40S ribosomal protein S28	no		-1.10686	-0.343208	-0.774269		-1.30521	-0.016204	-1.05239		-0.185145	0.198511	-0.258737	0	40S ribosomal protein S28	-0.741445	-0.791268	0.221057	0.394344	0.918905	0	0	0.0498233	1	0		Q9CQI3	Glia maturation factor beta		-0.934705	0.205893	-0.466027		-1.16504	0.147437	-0.648926		-0.153093	-0.0874267	-0.0938328
Q8VE95	UPF0598 protein C8orf82 homolog	no	-0.357852	0.10491	-1.24728	-0.295665	-0.363504	-0.184209	-0.418309	-0.697778	-0.342536	-0.428038	0.683193	-0.382663	0	UPF0598 protein C8orf82 homolog	-0.448972	-0.41595	0.285173	0.106414	0.919068	0	0	-0.0330214	0	1		E9QK49	Eukaryotic peptide chain release factor GTP-binding subunit ERF3A;Eukaryotic peptide chain release factor GTP-binding subunit ERF3B	-0.214943	0.277062	-0.698178	0.0125772	-0.209445	-0.0440444	-0.254668	-0.294312	-0.293412	-0.395986	0.397255	-0.217759
P11531	Dystrophin	no	0.290799	-0.191213	-0.16229	-1.16312	-0.0144591	-0.0459774	-0.512858	-0.806188	-0.0910753	0.242597	-0.434531	0.381756	0	Dystrophin	-0.306455	-0.344871	0.306138	0.191386	0.919372	0	0	0.0384158	1	0		Q62465	Synaptic vesicle membrane protein VAT-1 homolog	0.433707	-0.0190613	0.386811	-0.854873	0.1396	0.094187	-0.349217	-0.402722	-0.0419517	0.274649	-0.720469	0.54666
Q9ES46	Beta-parvin	no	0.347148	-0.873302	-0.895729		-0.650263	-0.549311	-0.0765856		-0.951351	0.395662	0.661673		0	Beta-parvin	-0.473961	-0.425387	0.410606	0.176819	0.920996	0	0	-0.0485744	0	1	Q9CQC7	Q9Z1D1	Eukaryotic translation initiation factor 3 subunit G	0.490057	-0.70115	-0.346628		-0.496204	-0.409147	0.0870554		-0.902227	0.427714	0.375735
P70122	Ribosome maturation protein SBDS	no	-0.123989	0.424253	0.508107		0.223453	0.982704	-0.265564		-0.287685	0.527097	-0.876619		0	Ribosome maturation protein SBDS	0.269457	0.313531	0.198207	0.363148	0.921694	0	0	-0.0440739	0	1		Q3TJM2	Ubiquinone biosynthesis monooxygenase COQ6	0.018919	0.596405	1.05721		0.377512	1.12287	-0.101923		-0.238562	0.559149	-1.16256
Q99JW2	Aminoacylase-1	no	-0.14956		-1.35154	-0.462177	-0.249171		-0.531913	-1.04668	-0.148633		0.621421	-0.236432	0	Aminoacylase-1	-0.654425	-0.609253	0.36005	0.233445	0.922025	0	0	-0.0451718	0	1		Q60931	Voltage-dependent anion-selective channel protein 3	-0.00665169		-0.802436	-0.153935	-0.0951113		-0.368272	-0.64321	-0.0995099		0.335483	-0.0715274
F8WIS7	Nesprin-1	no	-0.255711	-0.480862		0.291089	-0.742699	-0.30688		0.472974	0.0903459	-0.035938		-0.148551	0	Nesprin-1	-0.148495	-0.192202	0.229201	0.355588	0.923486	0	0	0.0437069	1	0		O35350	Calpain-1 catalytic subunit	-0.112802	-0.30871		0.599331	-0.588639	-0.166715		0.87644	0.139469	-0.0038861		0.0163537
Q9EQH3	Vacuolar protein sorting-associated protein 35	no	-0.912558	1.24786	-0.114006	1.1161	-1.94437	1.17435	0.583274	1.91702	-1.1337	0.0016001	0.746628	0.61549	0	Vacuolar protein sorting-associated protein 35	0.334348	0.432569	0.516513	0.837973	0.924401	0	0	-0.0982216	0	1	P08003	P10833	Ras-related protein R-Ras	-0.769649	1.42001	0.435095	1.42434	-1.79031	1.31452	0.746915	2.32049	-1.08458	0.033652	0.46069	0.780394
P56382	ATP synthase subunit epsilon, mitochondrial	no	-0.133274	-1.45424	-1.64338	-1.22892	-0.719178	-1.68475	-0.733827	-1.16083	-0.582262	0.0152073	1.07145	0.0386101	0	ATP synthase subunit epsilon, mitochondrial	-1.11495	-1.07465	0.338012	0.2277	0.924881	0	0	-0.0403058	0	1		P05125	Natriuretic peptides A;Atrial natriuretic factor;Auriculin-B;Auriculin-A;Atriopeptin-1;Atriopeptin-2;Natriuretic peptide	0.00963388	-1.28208	-1.09428	-0.920674	-0.565118	-1.54458	-0.570186	-0.757365	-0.533138	0.0472592	0.785509	0.203514
Q7TSZ0	Stress-70 protein, mitochondrial	no	-0.277575	-1.41192	-0.277436	-1.01797	-0.406595	-1.50087	0.00435915	-1.25411	-0.107957	-0.133728	0.351372	-0.245831	0	Stress-70 protein, mitochondrial	-0.746226	-0.789302	0.28231	0.353403	0.927377	0	0	0.0430761	1	0		Q9Z1Q5	Chloride intracellular channel protein 1	-0.134667	-1.23977	0.271665	-0.709732	-0.252535	-1.3607	0.168	-0.850639	-0.0588336	-0.101676	0.0654344	-0.0809269
P28474	Alcohol dehydrogenase class-3	no	-0.155544	0.151761	-0.418302	-0.106832	-0.179795	0.171915	-0.191228	-0.392329	0.104163	-0.113635	0.220009	-0.231528	0	Alcohol dehydrogenase class-3	-0.132229	-0.147859	0.116789	0.117233	0.927825	0	0	0.0156299	1	0		P26040	Ezrin	-0.0126354	0.323913	0.130799	0.20141	-0.025735	0.312079	-0.0275867	0.0111372	0.153286	-0.0815832	-0.0659289	-0.0666238
Q8R086	Sulfite oxidase, mitochondrial	no	-0.218748	-0.161901	-0.731789	-0.878802	-0.460116	-0.595919	-0.00233375	-1.0375	-0.0733907	-0.349964	0.791727	-0.114855	0	Sulfite oxidase, mitochondrial	-0.49781	-0.523968	0.180419	0.213126	0.928498	0	0	0.0261575	1	0		Q9WTP7	GTP:AMP phosphotransferase, mitochondrial	-0.0758393	0.0102506	-0.182688	-0.57056	-0.306056	-0.455755	0.161307	-0.634036	-0.0242671	-0.317912	0.505789	0.0500489
Q9QXC1	Fetuin-B	no	-0.0405861	-0.767274	0.375607	0.160788	0.0741741	-0.476676	0.415346	-0.167388	0.108955	0.379808	0.0840631	-0.235204	0	Fetuin-B	-0.0678662	-0.0386359	0.248137	0.188698	0.928559	0	0	-0.0292303	0	1		P63158	High mobility group protein B1	0.102322	-0.595122	0.924708	0.46903	0.228234	-0.336512	0.578987	0.236079	0.158079	0.41186	-0.201875	-0.0702998
Q62446	Peptidyl-prolyl cis-trans isomerase FKBP3	no	-0.262528	-2.0052	-1.35106	-1.44489	-1.00558	-2.08228	-0.35972	-1.42622	-0.758864	0.135563	0.774556	0.0188045	0	Peptidyl-prolyl cis-trans isomerase FKBP3	-1.26592	-1.21845	0.364305	0.361952	0.929362	0	0	-0.047469	0	1		Q3UKW2	Calmodulin;Calmodulin-like protein 3	-0.11962	-1.83305	-0.801959	-1.13665	-0.851521	-1.94212	-0.196079	-1.02276	-0.709741	0.167615	0.488618	0.183709
Q8BPD5	Apolipoprotein A-I;Truncated apolipoprotein A-I	no	0.549162	-0.613211	0.728348	1.71614	0.848318	-0.633299	0.149605	1.76181	0.328722	0.155589	-0.494401	0.122923	0	Apolipoprotein A-I;Truncated apolipoprotein A-I	0.59511	0.531608	0.477547	0.509626	0.930524	0	0	0.0635026	1	0		Q8BH95	Enoyl-CoA hydratase, mitochondrial	0.69207	-0.441059	1.27745	2.02438	1.00238	-0.493135	0.313246	2.16527	0.377846	0.187641	-0.780339	0.287827
P05202	Aspartate aminotransferase, mitochondrial	no	0.0381306	0.72609	-0.962044	0.0277484	-0.107918	0.28811	-0.296377	-0.191651	-0.156647	-0.446051	0.659001	-0.23672	0	Aspartate aminotransferase, mitochondrial	-0.0425185	-0.0769588	0.347338	0.127649	0.930552	0	0	0.0344403	1	0		Q9QYB1	Chloride intracellular channel protein 4	0.181039	0.898242	-0.412942	0.335991	0.0461418	0.428275	-0.132736	0.211815	-0.107523	-0.413999	0.373063	-0.0718155
Q8BZF8	Phosphoglucomutase-like protein 5	no	-0.00881885	0.83198	-0.555391	0.386803	-0.437253	0.82593	0.025646	0.384251	-0.594274	0.0177182	0.639374	0.0349721	0	Phosphoglucomutase-like protein 5	0.163643	0.199643	0.294848	0.268053	0.930981	0	0	-0.036	0	1		P48962	ADP/ATP translocase 1	0.134089	1.00413	-0.00628942	0.695045	-0.283193	0.966094	0.189287	0.787717	-0.54515	0.0497701	0.353436	0.199876
P50396	Rab GDP dissociation inhibitor alpha	no	-0.176655	0.265217	-0.0738087	-0.161391	-0.0992806	0.215112	-0.0742784	-0.237919	-0.205252	-0.0619345	0.0977213	0.0357255	0	Rab GDP dissociation inhibitor alpha	-0.0366595	-0.0490914	0.103145	0.0951369	0.932304	0	0	0.012432	1	0		Q9D6S7	Ribosome-recycling factor, mitochondrial	-0.0337467	0.437369	0.475293	0.146851	0.054779	0.355276	0.0893625	0.165548	-0.156129	-0.0298826	-0.188217	0.20063
Q69Z91	Acetyl-coenzyme A synthetase 2-like, mitochondrial	no	-0.186272	0.132691	-0.994837	-0.163801	-0.130733	-0.209867	-0.171424	-0.802364	0.0950534	-0.315052	0.948873	-0.664918	0	Acetyl-coenzyme A synthetase 2-like, mitochondrial	-0.303055	-0.328597	0.241776	0.158747	0.932942	0	0	0.0255423	1	0		F8WIY0	Isocitrate dehydrogenase [NADP];Isocitrate dehydrogenase [NADP] cytoplasmic	-0.0433634	0.304843	-0.445735	0.144441	0.0233263	-0.0697022	-0.00778262	-0.398898	0.144177	-0.283	0.662935	-0.500014
P62827	GTP-binding nuclear protein Ran	no	0.253361	0.713614	-0.0733937	0.592126	0.0868042	0.661492	0.0492397	0.605245	-0.256102	-0.0124212	0.0176425	0.0764479	0	GTP-binding nuclear protein Ran	0.371427	0.350695	0.17739	0.163784	0.934383	0	0	0.0207316	1	0		P62334	26S protease regulatory subunit 10B	0.396269	0.885766	0.475708	0.900368	0.240864	0.801657	0.212881	1.00871	-0.206978	0.0196308	-0.268295	0.241352
P63330	Serine/threonine-protein phosphatase 2A catalytic subunit alpha isoform;Serine/threonine-protein phosphatase 2A catalytic subunit beta isoform	no	0.292934	1.01677	-0.0264428	0.566292	0.290607	0.945057	0.142971	0.56754	0.132043	-0.0688146	0.23763	0.129996	0	Serine/threonine-protein phosphatase 2A catalytic subunit alpha isoform;Serine/threonine-protein phosphatase 2A catalytic subunit beta isoform	0.462389	0.486544	0.220946	0.176358	0.93482	0	0	-0.0241552	0	1		E9PX89	BolA-like protein 3	0.435842	1.18892	0.522658	0.874534	0.444667	1.08522	0.306612	0.971007	0.181166	-0.0367627	-0.0483078	0.2949
B8JJN0	Complement factor B;Complement factor B Ba fragment;Complement factor B Bb fragment	no	-0.414962	0.138835	0.0363421	0.673694	-0.145286	0.15755	-0.198348	0.524689	0.485635	0.0665024	-0.203829	-0.289565	0	Complement factor B;Complement factor B Ba fragment;Complement factor B Bb fragment	0.108477	0.0846514	0.223529	0.16631	0.934855	0	0	0.0238259	1	0		P17710	Hexokinase-1	-0.272053	0.310987	0.585443	0.981936	0.00877379	0.297715	-0.034707	0.928155	0.534759	0.0985544	-0.489767	-0.12466
Q9R0X4	Acyl-coenzyme A thioesterase 9, mitochondrial;Acyl-coenzyme A thioesterase 10, mitochondrial	no	0.0337975	0.970361	-0.0803615	1.15877	0.354673	1.10592	0.0550783	0.699278	0.18844	0.205145	0.0769435	-0.416838	0	Acyl-coenzyme A thioesterase 9, mitochondrial;Acyl-coenzyme A thioesterase 10, mitochondrial	0.520642	0.553738	0.317238	0.22627	0.935361	0	0	-0.0330955	0	1		P27773	Protein disulfide-isomerase A3	0.176706	1.14251	0.46874	1.46701	0.508733	1.24609	0.218719	1.10274	0.237564	0.237197	-0.208994	-0.251934
Q9D6Y9	1,4-alpha-glucan-branching enzyme	no	0.446568	1.88434	0.599117	1.72308	0.526355	1.31973	1.09198	1.8719	0.0781135	-0.4402	0.642194	-0.0685074	0	1,4-alpha-glucan-branching enzyme	1.16328	1.20249	0.372521	0.278572	0.93577	0	0	-0.0392143	0	1		Q99LC5	Electron transfer flavoprotein subunit alpha, mitochondrial	0.589476	2.05649	1.14822	2.03133	0.680414	1.45989	1.25562	2.27537	0.127237	-0.408148	0.356256	0.0963968
Q922B1	O-acetyl-ADP-ribose deacetylase MACROD1	no	-0.369942	-0.334491	-1.27235	-0.378494	-0.456019	-0.709169	-0.465849	-0.643231	-0.11673	-0.212874	0.693128	-0.224279	0	O-acetyl-ADP-ribose deacetylase MACROD1	-0.58882	-0.568567	0.228044	0.0636145	0.936537	0	0	-0.0202532	0	1		P62141	Serine/threonine-protein phosphatase PP1-beta catalytic subunit	-0.227033	-0.162339	-0.723253	-0.070252	-0.301959	-0.569005	-0.302208	-0.239765	-0.0676062	-0.180822	0.40719	-0.0593746
P22907	Porphobilinogen deaminase	no	-0.287556	-0.11746	-0.501982	-0.340907	-0.257067	0.0259659	-0.205385	-0.750452	-0.0843627	0.0241154	0.023365	-0.265852	0	Porphobilinogen deaminase	-0.311976	-0.296734	0.0792527	0.163277	0.936806	0	0	-0.015242	0	1	Q9ERS2	Q9CPW4	Actin-related protein 2/3 complex subunit 5	-0.144648	0.0546919	0.0471196	-0.0326651	-0.103008	0.16613	-0.0417438	-0.346985	-0.0352391	0.0561673	-0.262573	-0.100948
Q61206	Platelet-activating factor acetylhydrolase IB subunit beta	no	0.140302	-0.9981	0.380235	-0.431644	0.0209858	-0.543869	0.131141	-0.633546	-0.224413	0.116036	-0.340174	-0.181475	0	Platelet-activating factor acetylhydrolase IB subunit beta	-0.227302	-0.256322	0.308237	0.194081	0.939556	0	0	0.0290203	1	0		O08677	Kininogen-1;Kininogen-1 heavy chain;Bradykinin;Kininogen-1 light chain	0.283211	-0.825948	0.929337	-0.123401	0.175045	-0.403704	0.294782	-0.23008	-0.175289	0.148088	-0.626112	-0.0165704
Q91VT4	Carbonyl reductase family member 4	no	-0.158282	0.114909	-1.26931	0.441112	-0.528546	0.23137	-0.558469	-0.147334	-0.458229	-0.101443	0.784291	-0.793267	0	Carbonyl reductase family member 4	-0.217893	-0.250745	0.371267	0.185965	0.940397	0	0	0.0328521	1	0		Q63918	Serum deprivation-response protein	-0.0153741	0.287061	-0.720208	0.749354	-0.374486	0.371534	-0.394828	0.256132	-0.409106	-0.0693913	0.498353	-0.628363
P52480	Pyruvate kinase isozymes M1/M2	no	-0.297928	0.219587	-0.302511	-0.386442	-0.194809	0.121145	-0.0910549	-0.542281	0.053736	-0.103458	0.283006	-0.126328	0	Pyruvate kinase isozymes M1/M2	-0.191823	-0.17675	0.138638	0.138451	0.941178	0	0	-0.0150736	0	1		F8WIA1	CAP-Gly domain-containing linker protein 1	-0.15502	0.39174	0.246591	-0.0781998	-0.0407491	0.26131	0.072586	-0.138814	0.10286	-0.0714061	-0.00293167	0.0385766
Q8CHT0	Delta-1-pyrroline-5-carboxylate dehydrogenase, mitochondrial	no	-0.182545	0.347293	-1.23467	-0.0430363	-0.0773637	0.0743771	-0.595006	-0.633054	0.0320796	-0.264228	0.648043	-0.567397	0	Delta-1-pyrroline-5-carboxylate dehydrogenase, mitochondrial	-0.27824	-0.307762	0.337951	0.179684	0.94178	0	0	0.0295218	1	0		F8WJI6		-0.0396366	0.519445	-0.68557	0.265206	0.0766959	0.214541	-0.431365	-0.229588	0.0812032	-0.232176	0.362105	-0.402493
P49442	Inositol polyphosphate 1-phosphatase	no	-0.18299		0.0239824	0.152842	-0.0408926		0.151461	-0.0881593	-0.0638564		0.0497404	-0.343635	0	Inositol polyphosphate 1-phosphatase	-0.00205505	0.00746984	0.0978166	0.0732774	0.941904	0	0	-0.00952489	0	1		E9Q5W3	Cathepsin Z	-0.0400815		0.573084	0.461084	0.113167		0.315102	0.315307	-0.0147328		-0.236198	-0.178731
P50171	Estradiol 17-beta-dehydrogenase 8	no	-0.404962	0.133351	-1.2852	-0.0614701	-0.64063	0.155194	-0.593236	-0.652729	-0.155606	-0.0660941	0.671203	-0.650686	0	Estradiol 17-beta-dehydrogenase 8	-0.404571	-0.43285	0.313925	0.196435	0.942069	0	0	0.0282797	1	0		Q78IK2	Up-regulated during skeletal muscle growth protein 5	-0.262054	0.305503	-0.7361	0.246772	-0.48657	0.295358	-0.429595	-0.249263	-0.106482	-0.0340422	0.385265	-0.485782
Q9CPY7	Cytosol aminopeptidase	no	0.245557	0.364477	-0.444094	0.365957	0.133058	0.285298	-0.00556245	0.182268	0.0219526	-0.10663	0.297147	-0.184747	0	Cytosol aminopeptidase	0.132974	0.148765	0.194413	0.0604341	0.942319	0	0	-0.0157913	0	1		Q8BIJ6	Isoleucine--tRNA ligase, mitochondrial	0.388465	0.536629	0.105008	0.674199	0.287118	0.425463	0.158079	0.585735	0.0710762	-0.0745778	0.0112093	-0.0198431
Q61129	Complement factor I;Complement factor I heavy chain;Complement factor I light chain	no	-0.113773	-0.870282	0.172403	0.0286593	0.137308	-0.965299	0.125721	-0.184818	0.103255	-0.234109	-0.0136934	-0.18022	0	Complement factor I;Complement factor I heavy chain;Complement factor I light chain	-0.195748	-0.221772	0.232309	0.258826	0.942814	0	0	0.0260234	1	0		D3Z041	Long-chain-fatty-acid--CoA ligase 1	0.0291349	-0.69813	0.721504	0.336901	0.291368	-0.825134	0.289362	0.218649	0.152378	-0.202057	-0.299631	-0.0153158
F7BX26	Serine/threonine-protein phosphatase	no	-0.414073	0.391089		-0.228734	-0.122806	0.278552		-0.482622	0.41251	0.164933		-0.192226	0	Serine/threonine-protein phosphatase	-0.083906	-0.108959	0.24345	0.219841	0.942824	0	0	0.0250527	1	0		Q62009	Periostin	-0.271165	0.563241		0.0795085	0.0312541	0.418716		-0.0791561	0.461633	0.196985		-0.0273221
P10630	Eukaryotic initiation factor 4A-II	no	0.330307	0.754274	-0.306651	0.452898	-0.164848	0.601956	-0.151573	0.842929	-0.433575	-0.0973468	0.0159909	0.555374	0	Eukaryotic initiation factor 4A-II	0.307707	0.282116	0.223318	0.258952	0.942826	0	0	0.0255911	1	0		Q9CZ04	COP9 signalosome complex subunit 7a	0.473216	0.926427	0.24245	0.76114	-0.0107883	0.74212	0.012068	1.24639	-0.384452	-0.0652948	-0.269947	0.720279
Q9DBJ1	Phosphoglycerate mutase 1	no	0.147044	0.819275	0.121286	0.25255	-0.0996973	0.489828	0.424204	0.590142	-0.132433	-0.192866	0.186753	0.221796	0	Phosphoglycerate mutase 1	0.335039	0.351119	0.163891	0.154097	0.945346	0	0	-0.0160805	0	1		P61027	Ras-related protein Rab-10	0.289953	0.991427	0.670387	0.560792	0.0543624	0.629992	0.587845	0.993609	-0.0833094	-0.160814	-0.0991853	0.386701
Q8K411	Presequence protease, mitochondrial	no	-0.443996	0.210643	-0.587508	0.0342825	-0.293518	-0.0680457	-0.216192	-0.266199	0.343414	-0.0845727	0.320576	-0.197632	0	Presequence protease, mitochondrial	-0.196644	-0.210989	0.189993	0.0502652	0.945882	0	0	0.0143442	1	0		P59017	Bcl-2-like protein 13	-0.301088	0.382796	-0.0384063	0.342525	-0.139458	0.0721187	-0.0525508	0.137267	0.392537	-0.0525208	0.0346383	-0.0327281
Q5EBP8	Heterogeneous nuclear ribonucleoprotein A1	no	-0.737112	-0.691795	0.290052	-0.482776	-0.203308	-0.33463	-0.889946	-0.109789	0.231239	0.21891	-1.25371	0.221245	0	Heterogeneous nuclear ribonucleoprotein A1	-0.405408	-0.384418	0.238344	0.174704	0.945887	0	0	-0.0209896	0	1		Q9Z2U1	Proteasome subunit alpha type-5;Proteasome subunit alpha type	-0.594204	-0.519643	0.839153	-0.174534	-0.0492479	-0.194465	-0.726305	0.293677	0.280362	0.250962	-1.53964	0.386149
Q8C1A5	Thimet oligopeptidase	no	0.260905		0.105426	0.309478	0.450961		0.137127	0.114222	0.375906		-0.00830528	-0.143993	0	Thimet oligopeptidase	0.22527	0.234103	0.0615405	0.10863	0.94783	0	0	-0.00883378	0	1		Q04447	Creatine kinase B-type	0.403813		0.654527	0.61772	0.60502		0.300768	0.517689	0.42503		-0.294243	0.0209111
P21614	Vitamin D-binding protein	no	-0.456099	-1.40242	0.0490734	0.493867	-0.515532	-0.694999	-0.0296828	0.0465985	-0.111749	0.57997	-0.166158	-0.455437	0	Vitamin D-binding protein	-0.328894	-0.298404	0.407066	0.181583	0.948634	0	0	-0.03049	0	1	Q9R0Y5	Q8C166	Copine-1	-0.31319	-1.23026	0.598175	0.80211	-0.361472	-0.554834	0.133958	0.450065	-0.0626255	0.612022	-0.452096	-0.290533
Q9D6Y7	Mitochondrial peptide methionine sulfoxide reductase	no	-0.412316	-0.0616724	-0.544061	-0.311701	-0.392706	-0.290074	-0.115265	-0.496621	0.0311247	0.0224492	0.4606	-0.153409	0	Mitochondrial peptide methionine sulfoxide reductase	-0.332437	-0.323667	0.102025	0.0812605	0.948677	0	0	-0.00877087	0	1		Q71RI9	Kynurenine--oxoglutarate transaminase 3	-0.269408	0.11048	0.0050406	-0.00345838	-0.238647	-0.14991	0.0483758	-0.0931545	0.0802483	0.0545011	0.174662	0.0114957
Q8VE38	Oxidoreductase NAD-binding domain-containing protein 1	no	-0.211543	0.993833	-0.969091	0.292073	-0.405461	0.586881	-0.294938	0.090968	-0.113468	-0.209085	0.479268	-0.101677	0	Oxidoreductase NAD-binding domain-containing protein 1	0.026318	-0.00563763	0.413736	0.224344	0.948704	0	0	0.0319556	1	0		P08249	Malate dehydrogenase, mitochondrial	-0.0686346	1.16599	-0.41999	0.600315	-0.251401	0.727045	-0.131297	0.494434	-0.0643441	-0.177033	0.19333	0.0632269
Q8BVU5	ADP-ribose pyrophosphatase, mitochondrial	no	-0.176566	-1.45513		-1.08561	-0.37922	-1.13532		-1.1102	-0.253606	0.2451		0.176968	0	ADP-ribose pyrophosphatase, mitochondrial	-0.905767	-0.874913	0.379884	0.247953	0.949537	0	0	-0.0308539	0	1		Q9CZ42	ATP-dependent (S)-NAD(P)H-hydrate dehydratase	-0.0336582	-1.28297		-0.777367	-0.22516	-0.995159		-0.70673	-0.204482	0.277152		0.341872
E9Q8I0	Complement factor H	no	-0.203968	-0.0589129	0.556912	1.046	-0.450764	0.0676466	0.584047	1.26091	-0.401358	0.0945245	-0.0441464	0.503215	0	Complement factor H	0.335008	0.365461	0.288736	0.365665	0.950121	0	0	-0.0304529	0	1		Q9WUB3	Glycogen phosphorylase, muscle form;Phosphorylase	-0.0610594	0.113239	1.10601	1.35424	-0.296704	0.207811	0.747688	1.66438	-0.352234	0.126576	-0.330084	0.668119
P16125	L-lactate dehydrogenase B chain;L-lactate dehydrogenase	no	-0.413673	-0.190074	-1.2125	-1.02501	-0.594695	-0.436005	-0.357259	-1.54666	-0.120909	-0.199121	0.833289	-0.527303	0	L-lactate dehydrogenase B chain;L-lactate dehydrogenase	-0.710315	-0.733656	0.24322	0.275463	0.951448	0	0	0.0233409	1	0		Q9JHW2	Omega-amidase NIT2	-0.270765	-0.017922	-0.663397	-0.716771	-0.440635	-0.295841	-0.193618	-1.1432	-0.0717851	-0.16707	0.547351	-0.362399
P63085	Mitogen-activated protein kinase 1	no	-0.127839	1.51946	0.376139	1.04892	0.361552	1.53169	-0.10304	1.15505	0.173557	0.0730898	-0.54424	0.0860573	0	Mitogen-activated protein kinase 1	0.70417	0.736313	0.363249	0.371138	0.952659	0	0	-0.0321424	0	1		Q91XF0	Pyridoxine-5-phosphate oxidase	0.0150693	1.69162	0.92524	1.35716	0.515612	1.67185	0.0606008	1.55852	0.222681	0.105142	-0.830178	0.250962
Q9CQR4	Acyl-coenzyme A thioesterase 13	no	-0.185751	0.142168	-0.96512	-0.118266	-0.217288	0.0322767	-0.403309	-0.473718	0.00704379	-0.378148	0.344878	-0.370501	0	Acyl-coenzyme A thioesterase 13	-0.281742	-0.26551	0.23851	0.113042	0.953725	0	0	-0.0162326	0	1		Q149B8	Uncharacterized protein C1orf170 homolog	-0.0428431	0.31432	-0.416019	0.189976	-0.0632283	0.172441	-0.239668	-0.070252	0.0561673	-0.346096	0.0589399	-0.205597
Q8BVI4	Dihydropteridine reductase	no	-0.306435	0.144843	-0.720193	-0.14941	-0.374304	-0.00192932	-0.264512	-0.440497	-0.0476815	-0.224071	0.484432	-0.29295	0	Dihydropteridine reductase	-0.257799	-0.270311	0.180288	0.0965402	0.953789	0	0	0.0125118	1	0		Q8VEK3	Heterogeneous nuclear ribonucleoprotein U	-0.163526	0.316995	-0.171092	0.158832	-0.220244	0.138235	-0.100871	-0.0370308	0.00144204	-0.192019	0.198494	-0.128046
P05201	Aspartate aminotransferase, cytoplasmic	no	-0.374237	0.371652	-1.05958	-0.317876	-0.441842	0.10916	-0.251558	-0.716712	-0.122881	-0.280794	0.698015	-0.419813	0	Aspartate aminotransferase, cytoplasmic	-0.34501	-0.325238	0.292376	0.17344	0.955927	0	0	-0.019772	0	1		Q00915	Retinol-binding protein 1	-0.231329	0.543804	-0.510478	-0.00963388	-0.287783	0.249325	-0.0879174	-0.313246	-0.0737576	-0.248742	0.412077	-0.254909
A2AQ53	Fibrillin-1	no	-1.11002		1.0294	-0.718149	-1.51477		0.103475	0.456174	-0.47354		-0.798885	0.587587	0	Fibrillin-1	-0.266255	-0.318374	0.657631	0.606802	0.956363	0	0	0.0521195	1	0		Q9Z2I0	LETM1 and EF-hand domain-containing protein 1, mitochondrial	-0.967109		1.5785	-0.409907	-1.36071		0.267116	0.85964	-0.424416		-1.08482	0.752492
Q9CZ44	NSFL1 cofactor p47	no	-0.12684	-1.32187	-0.480087	-0.913736	-0.361387	-1.46526	-0.0134712	-0.913213	-0.24876	-0.0345066	0.641631	-0.0202053	0	NSFL1 cofactor p47	-0.710632	-0.688334	0.259619	0.318397	0.958545	0	0	-0.0222988	0	1		P34914	Epoxide hydrolase 2	0.0160683	-1.14972	0.0690147	-0.605494	-0.207328	-1.3251	0.15017	-0.509746	-0.199636	-0.00245465	0.355693	0.144699
Q99L47	Hsc70-interacting protein	no	0.283625	-1.28439	0.222784	-0.794596	0.0278699	-1.2536	0.234381	-0.691057	-0.335428	0.144654	-0.0364952	0.146017	0	Hsc70-interacting protein	-0.393143	-0.420601	0.386529	0.341218	0.959283	0	0	0.0274581	1	0		P50516	V-type proton ATPase catalytic subunit A	0.426533	-1.11223	0.771886	-0.486354	0.181929	-1.11343	0.398022	-0.287591	-0.286304	0.176706	-0.322433	0.310922
P62774	Myotrophin	no	0.261777	-0.564469		-0.155357	0.0203468	-0.40368		-0.11943	-0.275431	0.241404		-0.00656717	0	Myotrophin	-0.152683	-0.167588	0.238521	0.124752	0.959305	0	0	0.0149043	1	0		P51859	Hepatoma-derived growth factor	0.404685	-0.392317		0.152885	0.174406	-0.263515		0.284036	-0.226307	0.273456		0.158337
P37804	Transgelin	no	0.207363	-0.095674	1.29384	-0.183991	0.389238	0.368834	0.0506082	0.489837	0.180464	0.349785	-1.2443	0.729778	0	Transgelin	0.305384	0.324629	0.339974	0.0950919	0.959517	0	0	-0.0192455	0	1		P80315	T-complex protein 1 subunit delta	0.350271	0.0764781	1.84294	0.124251	0.543298	0.508999	0.214249	0.893303	0.229588	0.381837	-1.53024	0.894682
Q9CQF4	Uncharacterized protein C6orf203 homolog	no	-0.209713	-1.62696	-1.09957	-1.11469	-0.82481	-1.38396	-0.307285	-1.45303	-0.77221	0.183316	0.659558	-0.301188	0	Uncharacterized protein C6orf203 homolog	-1.01273	-0.992269	0.294399	0.268167	0.9607	0	0	-0.0204632	0	1		Q00897	Alpha-1-antitrypsin 1-4	-0.0668051	-1.45481	-0.550465	-0.806448	-0.67075	-1.24379	-0.143644	-1.04956	-0.723087	0.215368	0.373621	-0.136284
Q8VEK3	Heterogeneous nuclear ribonucleoprotein U	no	-0.64127	0.199196	0.34961	-0.0885018	0.0604383	0.0799624	-0.483407	0.217001	0.55048	-0.123116	-0.704772	0.469689	0	Heterogeneous nuclear ribonucleoprotein U	-0.0452416	-0.0315011	0.218476	0.154609	0.960901	0	0	-0.0137405	0	1		Q8BL66	Early endosome antigen 1	-0.498362	0.371348	0.898711	0.21974	0.214498	0.220127	-0.319766	0.620468	0.599603	-0.0910641	-0.99071	0.634593
Q8CIN4	Serine/threonine-protein kinase PAK 2;PAK-2p27;PAK-2p34	no	-0.112784	-0.262599	-0.00115794	-0.355641	-0.210296	-0.330337	-0.0401071	-0.131239	-0.0116711	-0.0384573	-0.118768	0.222789	0	Serine/threonine-protein kinase PAK 2;PAK-2p27;PAK-2p34	-0.183046	-0.177995	0.0786012	0.0615431	0.961381	0	0	-0.00505091	0	1		Q8BFP9	[Pyruvate dehydrogenase [lipoamide]] kinase isozyme 1, mitochondrial	0.0301242	-0.090447	0.547943	-0.0473989	-0.0562362	-0.190172	0.123534	0.272228	0.0374524	-0.00640533	-0.404706	0.387693
Q924M7	Mannose-6-phosphate isomerase	no	-0.153464	-0.101973	-0.682866	-0.823046	-0.256432	-0.35155	-0.255612	-0.945675	-0.0885674	-0.0659759	0.260159	-0.0485396	0	Mannose-6-phosphate isomerase	-0.440337	-0.452317	0.183047	0.165987	0.96292	0	0	0.01198	1	0		Q9JI46	Diphosphoinositol polyphosphate phosphohydrolase 1	-0.0105558	0.0701787	-0.133765	-0.514804	-0.102372	-0.211386	-0.0919711	-0.542208	-0.0394439	-0.0339239	-0.025779	0.116365
Q3TLP5	Enoyl-CoA hydratase domain-containing protein 2, mitochondrial	no		0.388895	-1.19282	-0.251091		0.532861	-0.791313	-0.705639		-0.232285	0.428417	-0.343292	0	Enoyl-CoA hydratase domain-containing protein 2, mitochondrial	-0.351673	-0.321364	0.459364	0.427828	0.963816	0	0	-0.030309	0	1		O08663	Methionine aminopeptidase 2		0.561047	-0.643721	0.0571515		0.673026	-0.627672	-0.302173		-0.200233	0.142479	-0.178388
Q8BFS6	Calcineurin-like phosphoesterase domain-containing protein 1	no	-0.0647084	-0.0282852	-0.179495	-0.605023	0.0804417	0.168194	-0.294812	-0.78486	0.192229	0.267544	0.119678	0.141708	0	Calcineurin-like phosphoesterase domain-containing protein 1	-0.219378	-0.207759	0.132524	0.216992	0.965333	0	0	-0.0116187	0	1		Q9WVQ5	Probable methylthioribulose-1-phosphate dehydratase	0.0781998	0.143867	0.369606	-0.29678	0.234501	0.308359	-0.131171	-0.381394	0.241352	0.299596	-0.16626	0.306612
P63017	Heat shock cognate 71 kDa protein	no	0.168013	-0.633681	0.148673	-0.547029	-0.0156383	-0.525761	0.101676	-0.376953	-0.142956	0.190629	-0.143133	0.15737	0	Heat shock cognate 71 kDa protein	-0.216006	-0.204169	0.216889	0.147863	0.965685	0	0	-0.0118369	0	1		Q8BMS4	Hexaprenyldihydroxybenzoate methyltransferase, mitochondrial	0.310922	-0.461529	0.697774	-0.238787	0.138421	-0.385597	0.265317	0.0265136	-0.0938328	0.222681	-0.429071	0.322274
Q8K0Z7	Translational activator of cytochrome c oxidase 1	no	-0.18901	0.186413	-0.727048	-0.382611	-0.1961	0.121993	-0.396546	-0.598184	-0.0496141	-0.112353	0.256158	-0.224399	0	Translational activator of cytochrome c oxidase 1	-0.278064	-0.267209	0.190654	0.153516	0.966132	0	0	-0.0108548	0	1		P10630	Eukaryotic initiation factor 4A-II	-0.0461015	0.358565	-0.177947	-0.0743684	-0.0420409	0.262157	-0.232905	-0.194717	-0.000490578	-0.0803014	-0.0297795	-0.059495
O35206	Collagen alpha-1(XV) chain;Endostatin	no	-0.27449	-0.614485	1.54294	1.00287	-1.29489	0.113953	0.907435	1.78464	-1.1406	0.596488	-0.300576	1.40279	0	Collagen alpha-1(XV) chain;Endostatin	0.414208	0.377785	0.512597	0.653656	0.966527	0	0	0.0364233	1	0		Q9QZ23	NFU1 iron-sulfur cluster scaffold homolog, mitochondrial	-0.131582	-0.442333	2.09204	1.31111	-1.14083	0.254117	1.07108	2.1881	-1.09148	0.62854	-0.586514	1.56769
P56392	Cytochrome c oxidase subunit 7A1, mitochondrial	no	-2.20246	0.758668	1.29323	0.365243	-1.16222	0.641166	0.756195	0.133204	1.16083	0.30982	-0.453314	-0.313161	0	Cytochrome c oxidase subunit 7A1, mitochondrial	0.0536706	0.0920863	0.775712	0.43946	0.967384	0	0	-0.0384158	0	1		Q99LC3	NADH dehydrogenase [ubiquinone] 1 alpha subcomplex subunit 10, mitochondrial	-2.05956	0.93082	1.84234	0.673486	-1.00816	0.78133	0.919836	0.53667	1.20995	0.341872	-0.739252	-0.148257
P62137	Serine/threonine-protein phosphatase PP1-alpha catalytic subunit;Serine/threonine-protein phosphatase	no	0.328748	1.12443	-2.45376	0.735374	0.120351	1.10969	-2.27375	0.961699	-0.185915	-0.12869	0.0756922	0.199444	0	Serine/threonine-protein phosphatase PP1-alpha catalytic subunit;Serine/threonine-protein phosphatase	-0.066302	-0.0205011	0.812226	0.782038	0.968918	0	0	-0.0458008	0	1		P70697	Uroporphyrinogen decarboxylase	0.471656	1.29658	-1.90466	1.04362	0.274411	1.24986	-2.11011	1.36516	-0.136791	-0.0966378	-0.210246	0.364348
Q3UDC3	Target of Myb protein 1	no	0.179481	-1.04455	-0.323826	-0.887905	-0.19097	-1.10342	-0.083529	-0.642253	-0.237949	0.00652468	0.231755	0.0381089	0	Target of Myb protein 1	-0.519199	-0.505042	0.279622	0.233308	0.970291	0	0	-0.0141572	0	1		O88569	Heterogeneous nuclear ribonucleoproteins A2/B1	0.32239	-0.872395	0.225275	-0.579663	-0.0369106	-0.963252	0.0801119	-0.238787	-0.188825	0.0385766	-0.0541826	0.203013
P18572	Basigin	no	0.19166	-1.24679	1.14502	0.478554	0.138487	-0.829106	0.811109	0.352889	0.193083	0.264376	-0.547989	-0.0335783	0	Basigin	0.14211	0.118345	0.504194	0.345567	0.970406	0	0	0.0237655	1	0		Q8BH58	TIP41-like protein	0.334568	-1.07464	1.69412	0.786796	0.292546	-0.688941	0.97475	0.756355	0.242206	0.296428	-0.833927	0.131326
P46656	Adrenodoxin, mitochondrial	no	0.00126875	-1.84914	-0.705359	-1.41533	-0.0318507	-2.34528	0.0621276	-1.54431	0.0179644	-0.0297454	0.655879	-0.3171	0	Adrenodoxin, mitochondrial	-0.992139	-0.964827	0.406473	0.589245	0.970954	0	0	-0.0273123	0	1		Q91XV3	Brain acid soluble protein 1	0.144177	-1.67699	-0.156257	-1.10709	0.122209	-2.20511	0.225769	-1.14084	0.067088	0.00230651	0.369941	-0.152196
Q9CPW4	Actin-related protein 2/3 complex subunit 5	no	1.04568	-0.657064	0.801792		0.698978	-0.0492847	0.609005		-0.230944	0.588816	-0.118119		0	Actin-related protein 2/3 complex subunit 5	0.396804	0.419566	0.531616	0.23586	0.971438	0	0	-0.0227624	0	1		O88456	Calpain small subunit 1;Calpain small subunit 2	1.18859	-0.484911	1.35089		0.853038	0.0908797	0.772646		-0.18182	0.620868	-0.404057
Q3UEB3	Poly(U)-binding-splicing factor PUF60	no	-1.57307	-0.550664		1.97743	-1.31156	-0.495406		1.50785	0.34572	0.107418		-0.543661	0	Poly(U)-binding-splicing factor PUF60	-0.0487673	-0.099704	1.05521	0.837595	0.971741	0	0	0.0509367	1	0		P08207	Protein S100-A10	-1.43016	-0.378512		2.28567	-1.1575	-0.355242		1.91132	0.394843	0.139469		-0.378757
A3KG59	Peptidase M20 domain-containing protein 2	no	-0.443641	-0.100594	-0.696959	-0.424341	-0.22333	-0.187284	-0.26702	-0.95781	0.177385	0.0724189	0.409074	-0.332703	0	Peptidase M20 domain-containing protein 2	-0.416384	-0.408861	0.12222	0.183708	0.974068	0	0	-0.00752273	0	1	P40142	Q9WUR9	Adenylate kinase isoenzyme 4, mitochondrial	-0.300733	0.0715576	-0.147857	-0.116098	-0.0692702	-0.0471196	-0.103379	-0.554343	0.226509	0.104471	0.123136	-0.167799
P17710	Hexokinase-1	no	-0.0974654	0.888757	0.69676	0.572256	-0.237094	1.41195	0.355901	0.579895	-0.126362	0.245933	-0.347608	0.0472293	0	Hexokinase-1	0.515077	0.527663	0.214306	0.341449	0.976291	0	0	-0.0125861	0	1		Q9DCM0	Protein ETHE1, mitochondrial	0.0454429	1.06091	1.24586	0.880498	-0.0830343	1.55211	0.519542	0.983361	-0.0772389	0.277985	-0.633546	0.212134
F6VW30	14-3-3 protein theta	no	0.892575	-0.859033	0.844809	-0.629824	0.387554	-0.475876	0.228457	0.0480183	-0.47571	0.301143	-0.52594	0.51605	0	14-3-3 protein theta	0.0621315	0.0470382	0.468114	0.187595	0.977578	0	0	0.0150933	1	0	Q78J03	Q3TLP5	Enoyl-CoA hydratase domain-containing protein 2, mitochondrial	1.03548	-0.686881	1.39391	-0.321582	0.541614	-0.335712	0.392097	0.451485	-0.426587	0.333195	-0.811878	0.680954
Q9QYR9	Acyl-coenzyme A thioesterase 2, mitochondrial	no	-0.278415	0.101662	-1.54991	-0.563441	-0.306544	-0.0350792	-0.826832	-1.07458	0.0205786	-0.376847	0.624733	-0.53698	0	Acyl-coenzyme A thioesterase 2, mitochondrial	-0.572526	-0.560758	0.353128	0.237306	0.978955	0	0	-0.0117674	0	1		P68037	Ubiquitin-conjugating enzyme E2 L3	-0.135507	0.273814	-1.00081	-0.255199	-0.152484	0.105085	-0.663191	-0.671112	0.0697022	-0.344795	0.338795	-0.372076
Q9CZU6	Citrate synthase, mitochondrial	no	0.109629	0.810724	-1.109	0.181363	-0.225905	0.390679	-0.132387	0.00655939	-0.347548	-0.305064	0.813709	-0.204823	0	Citrate synthase, mitochondrial	-0.00182097	0.00973654	0.401253	0.135663	0.979647	0	0	-0.0115575	0	1		P35505	Fumarylacetoacetase	0.252537	0.982876	-0.559898	0.489605	-0.0718457	0.530843	0.0312541	0.410026	-0.298424	-0.273012	0.527771	-0.0399183
F7AWB4	UDP-N-acetylhexosamine pyrophosphorylase-like protein 1	no	0.477584		0.902018	0.378698	0.616558		0.755051	0.401993	0.262845		-0.424275	-0.0689124	0	UDP-N-acetylhexosamine pyrophosphorylase-like protein 1	0.5861	0.591201	0.160518	0.102705	0.980141	0	0	-0.00510051	0	1		Q9D1Q6	Endoplasmic reticulum resident protein 44	0.620493		1.45112	0.68694	0.770618		0.918692	0.805459	0.311968		-0.710213	0.0959919
P70460	Vasodilator-stimulated phosphoprotein	no	0.0818729	-0.126125		-0.888581	-0.282941	-0.379318		-0.246598	-0.322205	-0.00858368		0.362066	0	Vasodilator-stimulated phosphoprotein	-0.310944	-0.302952	0.294994	0.039598	0.980942	0	0	-0.00799178	0	1		Q9Z2I9	Succinyl-CoA ligase [ADP-forming] subunit beta, mitochondrial	0.224781	0.0460271		-0.580338	-0.128882	-0.239154		0.156868	-0.273082	0.0234682		0.52697
Q9D8S9	BolA-like protein 1	no	-0.539274	-1.68842	-0.482289	-1.30217	-0.519299	-1.86869	-0.175694	-1.39993	-0.0327699	0.0445071	0.493706	-0.197411	0	BolA-like protein 1	-1.00304	-0.990904	0.295167	0.389957	0.981068	0	0	-0.0121341	0	1		P07758	Alpha-1-antitrypsin 1-1	-0.396365	-1.51627	0.0668125	-0.993928	-0.365239	-1.72853	-0.0120534	-0.996461	0.0163537	0.0765591	0.207768	-0.0325067
[truncated: 132 more rows]

## Sheet: fpr pdf
Additional file 2	Overview of proteins that were identified and quantified in at least three of the four replicate experiments. See main text for details on data analysis.
[truncated: 1,075 more rows]
